1 ACE2-lentiviral transduction enables mouse SARS-CoV-2 infection and mapping of receptor interactions

2

3 Short title: Mouse SARS-CoV-2 infection using ACE2-lentivirus

4

5 Daniel J. Rawle<sup>1\*</sup>, Thuy T. Le<sup>1</sup>, Troy Dumenil<sup>1</sup>, Kexin Yan<sup>1</sup>, Bing Tang<sup>1</sup>, Cameron Bishop<sup>1</sup>, Andreas  
6 Suhrbier<sup>1,2</sup>.

7

8 <sup>1</sup> Immunology Department, QIMR Berghofer Medical Research Institute, Brisbane, Queensland. 4029,  
9 Australia.

10 <sup>2</sup> Australian Infectious Disease Research Centre, GVN Center of Excellence, Brisbane, Queensland 4029  
11 and 4072, Australia.

12

13 \*Corresponding author. Email: [Daniel.Rawle@qimrberghofer.edu.au](mailto:Daniel.Rawle@qimrberghofer.edu.au)

14

15

16

17

18

19

20

21

22

23

24

25

26

27 **ABSTRACT**

28 SARS-CoV-2 uses the human ACE2 (hACE2) receptor for cell attachment and entry, with mouse ACE2  
29 (mACE2) unable to support infection. Herein we describe an ACE2-lentivirus system and illustrate its  
30 utility for *in vitro* and *in vivo* SARS-CoV-2 infection models. Transduction of non-permissive cell lines  
31 with hACE2 imparted replication competence, and transduction with mACE2 containing N30D, N31K,  
32 F83Y and H353K substitutions, to match hACE2, rescued SARS-CoV-2 replication. Intranasal hACE2-  
33 lentivirus transduction of C57BL/6J mice permitted significant virus replication in lungs. RNA-Seq  
34 analyses illustrated that the model involves an acute inflammatory disease followed by resolution and  
35 tissue repair, with a transcriptomic profile similar to that seen in COVID-19 patients. Intranasal hACE2-  
36 lentivirus transduction of IFNAR<sup>-/-</sup> and IL-28RA<sup>-/-</sup> mice lungs was used to illustrate that loss of type I or  
37 III interferon responses have no significant effect on virus replication. However, their importance in  
38 driving inflammatory responses was illustrated by RNA-Seq analyses. We also demonstrate the utility of  
39 the hACE2-lentivirus transduction system for vaccine evaluation in C57BL/6J mice. The ACE2-  
40 lentivirus system thus has broad application in SARS-CoV-2 research, providing a tool for both  
41 mutagenesis studies and mouse model development.

42

43 **AUTHOR SUMMARY**

44 SARS-CoV-2 uses the human ACE2 (hACE2) receptor to infect cells, but cannot infect mice because the  
45 virus cannot bind mouse ACE2 (mACE2). We use an ACE2-lentivirus system *in vitro* to identify four  
46 key amino acids in mACE2 that explain why SARS-CoV-2 cannot infect mice. hACE2-lentivirus was  
47 used to express hACE2 in mouse lungs *in vivo*, with the inflammatory responses after SARS-CoV-2  
48 infection similar to those seen in human COVID-19. Genetically modified mice were used to show that  
49 type I and III interferon signaling is required for the inflammatory responses. We also show that the  
50 hACE2-lentivirus mouse model can be used to test vaccines. Overall this paper demonstrates that our  
51 hACE2-lentivirus system has multiple applications in SARS-CoV-2 and COVID-19 research.

52

53 **INTRODUCTION**

54 Severe acute respiratory syndrome coronavirus 2 (SARS-CoV-2) has spread rapidly into a global  
55 pandemic (1). SARS-CoV-2 infection can be asymptomatic, but is also the etiological agent of  
56 coronavirus disease 2019 (COVID-19), with acute respiratory distress syndrome (ARDS) representing a  
57 common severe disease manifestation (2). The SARS-CoV-2 pandemic has sparked unprecedented global  
58 research into understanding mechanisms of virus replication and disease pathogenesis, with the aim of  
59 generating new vaccines and treatments. Key to these efforts has been the development of animal models  
60 of SARS-CoV-2 infection and COVID-19 disease (3).

61 The receptor binding domain (RBD) of the spike glycoprotein of SARS-CoV-2 binds human  
62 Angiotensin-Converting Enzyme 2 (hACE2) as the primary receptor for cell attachment and entry (4).  
63 Mice do not support productive virus replication because the SARS-CoV-2 spike does not bind to mouse  
64 ACE2 (mACE2) (5). Expression of hACE2 in mice via a transgene allows SARS-CoV-2 infection and  
65 provides mouse models that recapitulate aspects of COVID-19. In such models hACE2 is expressed  
66 under control of various promoters, including K18 (6-12), mACE2 (13, 14), HFH4 (15), or chicken  $\beta$ -  
67 actin (16). These mouse models all differ in various aspects including level of virus replication, disease  
68 manifestations and tissue tropisms (3), but do not provide a simple mechanism whereby genetically  
69 modified (GM) or knock-out mice can be exploited for SARS-CoV-2/COVID-19 research. Two systems  
70 that do allow the latter, involve transient hACE2 expression in mouse lungs using adenovirus vectors  
71 (Ad5) or adeno-associated virus (AAV), which impart the capacity for productive SARS-CoV-2  
72 replication in mouse lungs (10, 17, 18). A third model involves use of mouse adapted SARS-CoV-2 (19-  
73 21), although use of this mutated virus may complicate evaluation of interventions targeting human  
74 SARS-CoV-2.

75 Lentivirus-mediated gene expression in mice lung epithelium has been investigated as a treatment  
76 for cystic fibrosis and provides long term expression of the cystic fibrosis transmembrane conductance  
77 regulator (CFTR) (22-28). These studies demonstrated that VSV-G pseudotyped lentivirus can transduce  
78 mouse airway epithelial cells and their progenitors resulting in long-term gene expression. Herein we

79 describe an ACE2-lentiviral system that conveys SARS-CoV-2 replication competence *in vitro* and allows  
80 productive infection of mouse lungs *in vivo*. We illustrate that GM mice can thereby be accessed for  
81 SARS-CoV-2/COVID-19 research, with experiments using IFNAR<sup>-/-</sup> and IL-28RA<sup>-/-</sup> mice showing the  
82 importance of type I and III IFN responses for SARS-CoV-2-induced inflammation. We also illustrate  
83 the use of hACE2-lentiviral transduction of lungs of wild-type C57BL/6J mice for evaluation of vaccines.

84

## 85 **RESULTS**

### 86 **hACE2-lentiviruses for evaluating the role of RBD binding residues**

87 hACE2 coding sequence (optimized for mouse codon usage) was cloned into the dual promoter lentiviral  
88 vector pCDH-EF1 $\alpha$ -MCS-BGH-PGK-GFP-T2A-Puro (herein referred to as pCDH) (Figure 1A), which  
89 had been modified to contain the full length EF1 $\alpha$  promoter. Previous studies have shown that the EF1 $\alpha$   
90 promoter effectively drives gene expression after intranasal VSV-G pseudotyped lentivirus transduction  
91 of mouse lungs (29). The GFP marker and puromycin resistance gene (cleaved from GFP by T2A) are  
92 expressed from a separate 3-phosphoglycerate kinase (PGK) promoter (Figure 1A). VSV-G pseudotyped  
93 pCDH-hACE2 lentivirus was produced by co-transfection of the lentiviral vector with VSV-G and Gag-  
94 Pol-Rev plasmids in HEK293T cells, and was used to transduce HEK293T (human embryonic kidney)  
95 cells followed by puromycin selection. HEK293T cells do not express hACE2 (30) and therefore do not  
96 support SARS-CoV-2 replication, whereas HEK293T cells transduced with hACE2 supported significant  
97 virus replication (Figure 1B). A T92Q mutation in hACE2 was introduced to determine if removing the  
98 N90 glycosylation motif increased SARS-CoV-2 replication, as computer-based modelling predicted  
99 enhanced affinity for spike RBD with removal of this glycan (31, 32). We also introduced K31N/K353H  
100 and T27Y/L79Y/N330Y mutations into hACE2 as these changes were predicted by computer modeling to  
101 reduce and enhance affinity for spike RBD (31), respectively. HEK293T cells expressing these  
102 aforementioned hACE2 mutations did not significantly affect SARS-CoV-2 replication (Figure 1B),  
103 illustrating that *in silico* affinity predictions do not always translate to differences in virus replication.

104

105 **Characterizing residues responsible for the inability of mACE2 to support SARS-CoV-2 replication**

106 The ACE2-lentivirus system was used to introduce amino acid substitutions into mACE2 to identify the  
107 amino acids that are responsible for restricting SARS-CoV-2 replication in mACE2-expressing cells.  
108 Analysis of crystal structures and species susceptibilities has suggested residues that may be responsible  
109 for the differences in binding of the RBD to hACE2 and mACE2 (33-37). Based on these *in silico*  
110 studies, we identified seven residues potentially responsible for the human-mouse differences. mACE2-  
111 lentivirus vectors were then generated that contained all seven substitutions  
112 (N30D/N31K/T79L/S82M/F83Y/A329E/H353K), with two further vectors constructed to identify the  
113 minimum requirements for SARS-CoV-2 replication. The latter contained a subset of the seven changes;  
114 four amino acid changes (N30D/N31K/F83Y/H353K) and two amino acid changes (N31K/H353K).

115 As expected HEK293T cells expressing mACE2 did not support productive SARS-CoV-2  
116 replication, and CPE was not observed. In contrast, all three mACE2 mutants significantly rescued virus  
117 replication and infection resulted in CPE (Figure 1C-D). However, virus replication was significantly  
118 lower for cells expressing mACE2 with only two substitution (N31K/H353K) (Figure 1C) and infection  
119 produced less CPE (Figure 1D). Thus two amino acid changes (N31K and H353K) in mACE2 were  
120 sufficient to support SARS-CoV-2 replication; however, at least four changes  
121 (N30D/N31K/F83Y/H353K) were required for virus replication and CPE to be comparable to cells  
122 expressing hACE2. These studies highlight the utility of the ACE2-lentivirus system for studying the role  
123 of ACE2 residues in productive SARS-CoV-2 infections.

124

125 **Modeling the RBD:ACE2 key interactions for mouse, human and virus variants**

126 Of all the potential interactions between the RBD and ACE2 previously identify by X ray  
127 crystallography and of all the amino acid differences between human and mouse ACE2 (33, 37), our data  
128 identified a key role for 4 ACE2 mutations for conferring SARS-CoV-2 infectivity on mACE2 expressing  
129 cells. Modeling of the interactions between these 4 mutations and the RBD predict improved interactions  
130 between the virus and the receptor (Figure 1E), providing an explanation for the gain of function for the

131 mutated mACE2. The F83Y substitution replaced a non-polar interaction between mACE2-F83 and  
132 RBD-N487, with a polar interaction between hACE2-Y83 and RBD-N487. The N31K substitution  
133 created new interactions between ACE2-K31 and RBD-Q493. The N30D substitution created a salt  
134 bridge interaction between ACE2-D30 and RBD-K417. Lastly, the H353K substitution created a new  
135 hydrogen bond with RBD-G496.

136 Recently, SARS-CoV-2 variants have emerged with mutations in the RBD, with two of the key  
137 mutations involving interactions with hACE2 residues 30 and 353 (38). Republic of South Africa (RSA)  
138 variants (B.1.351 and 501Y.V2) have the RBD mutations K417N and N501Y, and the United Kingdom  
139 (UK) variants (B.1.1.7 and 501Y.V1) have the N501Y mutation (38). Modelling predicts that the K417N  
140 mutation would result in the gain of an interaction between RBD N417 and mACE2-Q34, whereas the  
141 interaction between K417 and hACE2-D30 would be lost (Figure 1F). The selection for RBD-K417N in  
142 humans may therefore be more related to antibody escape (39, 40), rather than improving interactions  
143 with hACE2. The N501Y mutation in the RBD is predicted to generate new interactions between Y501  
144 with mACE2-H353, and new polar interactions between Y501 and hACE2-K353 (Figure 1F). Our  
145 modeling supports the observation that viruses with K417N and N501Y mutations have increased affinity  
146 for mACE2, with both appearing in mouse-adapted SARS-CoV-2 (41).

147

#### 148 **hACE2-lentivirus transduction of mouse cell lines imparts SARS-CoV-2 replication competence**

149 To determine whether hACE2-lentivirus transduction could make mouse cell lines SARS-CoV-2  
150 replication competent and thus available for SARS-CoV-2 research, 3T3 (mouse embryonic fibroblasts)  
151 and AE17 (mouse lung mesothelioma cell line) cells were transduced with hACE2. Significant virus  
152 replication was seen in transduced cells (Supplementary Figure 1), although somewhat lower than that  
153 seen in transduced HEK293T cells. Overt CPE was not seen (Supplementary Figure 1). This illustrates  
154 that the hACE2-lentivirus system can be used for mouse cell lines, but that the efficiency of viral  
155 replication may be cell line or cell type dependent.

156

157 **SARS-CoV-2 replication in hACE2-lentivirus transduced C57BL/6J, IFNAR<sup>-/-</sup> and IL-28RA<sup>-/-</sup> mice**  
158 **lung**

159 To illustrate the utility of the hACE2-lentivirus system for use in GM mice, we investigated the role of  
160 type I and type III IFN receptor signaling in SARS-CoV-2 infections. C57BL/6J, IFNAR<sup>-/-</sup> and IL-28RA<sup>-/-</sup>  
161 <sup>-/-</sup> were inoculated intranasally (i.n.) with  $1.2-2.2 \times 10^4$  transduction units of hACE2-lentivirus, equivalent to  
162 approximately 190-350 ng of p24 per mice (Figure 2A). An hour prior to administration of lentivirus,  
163 mice were treated i.n. with 1% lysophosphatidylcholine (LPC) to enhance transduction efficiency (25,  
164 42). One week later mice were challenged with SARS-CoV-2 ( $10^5$  CCID<sub>50</sub> i.n. per mice), and lungs were  
165 collected at 2, 4 and 6 days post infection for C57BL/6J and IFNAR<sup>-/-</sup> mice and day 2 for IL-28RA<sup>-/-</sup>  
166 mice (Figure 2A). Mice did not display overt clinical symptoms or weight loss (Figure 2B), consistent  
167 with some studies using Ad5-hACE2 (10), but not others (43). RT-qPCR analyses indicated similar levels  
168 of hACE2 mRNA after transduction of mouse lungs in each of the 3 mouse strains, with expression  
169 maintained over the 6 day course of the experiment at levels significantly higher than untransduced mice  
170 (Figure 2C).

171 Lungs from infected C57BL/6J, IFNAR<sup>-/-</sup> and IL-28RA<sup>-/-</sup> were analyzed for infectious virus tissue  
172 titers. Untransduced lungs showed no detectable virus titers (Figure 2D), whereas hACE2-lentivirus  
173 transduced lungs showed significant viral titers ranging from  $10^2$  to  $10^5$  CCID<sub>50</sub>/g for all strains of mice on  
174 day 2, with titers dropping thereafter (Figure 2D). Viral RNA levels were measured using RT-qPCR, with  
175 untransduced lungs showing low and progressively decaying levels post-inoculation (Figure 2E). For all  
176 hACE2-lentivirus transduced lungs, significantly elevated and persistent viral RNA levels were seen for  
177 all strains and at all time points by RT-qPCR (Figure 2E). Reducing viral titers and lingering viral RNA  
178 have been reported previously for K18-hACE2 mice (9) and has also been suggested in human infections  
179 (44). RNA-Seq also illustrated that virus replication in hACE2-lentivirus transduced lungs, K18-hACE2  
180 transgenic mice and Ad5-hACE2 transduced lungs (43) were not significantly different when normalized  
181 to hACE2 mRNA expression (Figure 2F), suggesting comparable hACE2 translation efficiencies and  
182 SARS-CoV-2 replication efficiencies in these different expression systems.

183           Importantly, no significant differences in viral loads emerged between C57BL/6J, IFNAR<sup>-/-</sup> and  
184 IL-28RA<sup>-/-</sup> mice (Figure 2D, E). This remained true even when viral RNA levels were normalized to  
185 hACE2 mRNA levels (Supplementary Figure 2). Similar results were obtained by RNA-Seq, with viral  
186 read counts not significantly different for the 3 mouse strains (Supplementary Figure 3A-D). Thus using  
187 three different techniques, no significant effects on viral replication could be seen in mice with type I or  
188 type III IFN receptor deficiencies.

189

### 190 **SARS-CoV-2 replication in hACE2-lentivirus transduced mice lung induces inflammatory** 191 **signatures by day 2 post-infection**

192 To determine the innate responses to SARS-CoV-2 replication in hACE2-transduced mouse lungs, gene  
193 expression in lungs of infected hACE2-transduced mice was compared with infected untransduced mice  
194 on day 2 post-infection using RNA-Seq. Differentially expressed genes (DEGs) between these groups  
195 were identified using a false discovery rate (FDR, or q value) threshold of <0.05 (Figure 3A;  
196 Supplementary Table 1A-C). Of the 110 DEGs, 95 were upregulated, with ≈40% of these classified as  
197 type I IFN-stimulated genes (ISGs) as classified by Interferome (using conservative settings that only  
198 included genes validated *in vivo* for mice) (Figure 3B, full list in Supplementary Table 1D). Type III  
199 ISGs are known to be poorly annotated in this database, and so this analysis likely under-estimates the  
200 number of such ISGs.

201           Ingenuity Pathway Analysis (IPA) of the 110 DEGs produced a series of pro-inflammatory  
202 Upstream Regulators (USRs) (Supplementary Table 1E-F) and included Th1, Th2 and Th17-associated  
203 cytokine USRs, as well as type I IFN USRs (Figure 3C). SARS-CoV-2-specific T cells in humans were  
204 reported to be predominantly Th1-associated, but Th2-associated cytokines were also identified (45). A  
205 cytokine and type I IFN DEG list has been published for a RNA-Seq analysis of SARS-CoV-2 infected  
206 K18-hACE2 transgenic mice (9). These DEG lists were used to interrogate the full pre-ranked (fold  
207 change) gene list (Figure 3A, Supplementary Table 1B) by Gene Set Enrichment Analysis (GSEA).  
208 Significant enrichments were observed (Figure 3D), indicating similar cytokine and type I interferon



209 (IFN) responses after SARS-CoV-2 infection of K18-hACE2 transgenic and hACE2-lentivirus transduced  
210 mice.

211 *IPA Diseases and Functions* analysis of the 110 DEGs revealed a series of annotations dominated  
212 by cellular infiltration and innate responses signatures (Figure 3E, Supplementary Table 1G-H). Several  
213 of the annotations were associated with monocytes and macrophages (Figure 3E), consistent with a  
214 previous report showing that inflammatory monocyte-macrophages were the major source of  
215 inflammatory cytokines in mouse adapted SARS-CoV infected mice (46). The cellular infiltrates in  
216 COVID-19 patient lungs is also dominated by monocyte-macrophages with a suggested role in severe  
217 disease (47). Innate immune signaling was also the dominant signature in other analyses including GO  
218 Biological Processes and Cytoscape (Supplementary Table 1I-J).

219 GSEA analysis using the >31,000 gene signatures available from the molecular signatures  
220 database (MSigDB), indicated significant negative enrichment (negative NES scores) of gene sets  
221 associated with translation and mitochondrial electron transport chain function (Supplementary Table  
222 1K). Translation inhibition by SARS-CoV-2 Nsp1 via the blocking of mRNA access to ribosomes has  
223 been reported previously (48, 49). SARS-CoV-2 down-regulation of genes associated with cellular  
224 respiration and mitochondrial function has also been shown in human lung (50).

225 DEGs from human COVID-19 lung (51) were also enriched in our hACE2-lentivirus transduced  
226 mouse lungs, and analysis of the core enriched genes indicated the similarity was due to cytokine, IFN,  
227 chemokine and inflammatory signaling genes (Figure 3F, Supplementary Table 1L-M). Another human  
228 COVID-19 lung dataset was also interrogated (52) and the results again illustrated enrichment of immune-  
229 related DEGs in the hACE2-lentivirus transduced mice (Supplementary Table 1N).

230 Overall these analyses illustrate that SARS-CoV-2 infection in hACE2-lentivirus transduced  
231 C57BL/6J mice lungs significantly recapitulate responses seen in other murine models and in COVID-19  
232 patients.

233

234

235 **Day 6 post-infection is characterized by inflammation resolution and tissue repair signatures**

236 To determine how response profiles progress in the hACE2-lentivirus model, RNA-Seq was used to  
237 compare lungs on day 2 with lungs on day 6 post-infection, with day 6 broadly representing the time of  
238 severe lung disease in the K18-hACE2 model (9). As noted above (Figure 2D), the virus titers had  
239 dropped in hACE2-lentivirus transduced mice lung over this time period by  $\approx 2.8$  logs, and severe disease  
240 (typically measured by weight loss) was not evident in this hACE2-lentivirus model (Figure 2B). In both  
241 hACE2-lentivirus transduced and untransduced C57BL/6J mice there was a clear evolution of responses  
242 from day 2 to day 6 post-infection; however, DEGs obtained from the former were largely distinct from  
243 DEGs obtained from the latter (Figure 4A). The RNA-Seq data thus illustrated that the DEGs associated  
244 with virus infection were distinct from those associated with virus inoculation (Figure 4A). RNA-Seq of  
245 infected lungs provided 551 DEGs, 401 up-regulated and 150 down-regulated (Figure 4B, Supplementary  
246 Table 2A-C).

247 IPA USR analyses of the 551 DEGs showed a clear reduction in inflammatory cytokine  
248 annotations, although the IL4 signature remained a dominant feature on day 6 (Figure 4C, Supplementary  
249 Table 2D-E). A Th2 skew and IL-4 have both been associated with lung damage in COVID-19 patients  
250 (53). On day 6 there was an up-regulation of USRs primarily associated with tissue repair (Figure 4D,  
251 Supplementary Table 2F); MAPK1 (also known as ERK) and MAPK9 (54), BMP7 (55), TCF7L2 (56),  
252 and KLF4 (57, 58). B and T cell-associated USRs were also seen (Figure 4D, green circles) (59-61),  
253 consistent with development of an adaptive immune response. A relatively minor PARP1 signature was  
254 identified (Figure 4D), with PARP inhibitors being considered for COVID-19 therapy (62, 63). A strong  
255 signature associated with estrogen receptor 1 (ESR1) was observed (Figure 4D), with estrogen having  
256 anti-inflammatory properties and believed to be associated with reduced COVID-19 severity in women  
257 (64-66), and reduced SARS-CoV disease severity in female mice (46, 67). Follicle stimulating hormone  
258 (FSH) (Figure 4D) stimulates estrogen production, and inhibin subunit alpha (INHA) is involved in the  
259 negative feedback of FSH production (68). IPA Diseases and Functions analysis, Cytoscape, and GO  
260 Biological Processes analyses further supported the contention that on day 6 inflammation had abated and

261 tissue repair was underway (Supplementary Table 2G-L).

262 The >31,000 gene sets available in MSigDB were used to interrogate the complete gene list (pre-  
263 ranked by fold change) for day 6 versus day 2 (Supplementary Table 2B) by GSEA. A highly significant  
264 negative enrichment for inflammatory response, and a highly significant positive enrichment for cilium  
265 development was seen (Figure 4E). Cilia in mammals are found in the lining of the respiratory  
266 epithelium. These GSEAs thus provide further support for the conclusion above, together arguing that in  
267 the hACE2-lentivirus model, day 6 post infection is characterized by inflammation resolution and tissue  
268 repair.

269

### 270 **Type I and III IFN signaling is required for SARS-CoV-2-induced lung inflammation**

271 To determine what responses to SARS-CoV-2 infection are dependent on type I IFN signaling, the  
272 lentivirus system was used to analyze IFNAR<sup>-/-</sup> mice lung using RNA-Seq. IFNAR<sup>-/-</sup> and C57BL/6J mice  
273 were transduced with hACE2-lentivirus and were then infected with SARS-CoV-2 and lungs harvested  
274 for RNA-Seq on days 2 and 6 post-infection. The largest impact of type I IFN signaling deficiency was  
275 seen on day 2 post infection (Figure 5A), consistent with disease resolution on day 6 (Figure 4C-E). The  
276 total number of DEGs for IFNAR<sup>-/-</sup> versus C57BL/6J mouse lungs on day 2 was 192, with most of these  
277 down-regulated (Figure 5A, Supplementary Table 3A-C). Viral reads were not significantly different  
278 between these two mouse strains (Figure 5A), confirming that knocking out type I IFN signaling is  
279 insufficient to significantly affect SARS-CoV-2 replication (69).

280 We showed in Figure 3 that RNA-Seq analysis revealed 110 DEGs associated with inflammatory  
281 responses when hACE2-transduced versus untransduced C57BL/6J mouse lungs on day 2 post infection  
282 were compared. When the same comparison was made for hACE2-lentivirus transduced versus  
283 untransduced lungs in SARS-CoV-2 infected IFNAR<sup>-/-</sup> mice, only 1 DEG (Kcnk5) was identified (Figure  
284 5B). This clearly illustrated that the inflammatory responses on day 2 in C57BL/6J mice (Figure 3C)  
285 required intact type I IFN signaling.

286 As a control, the number of DEGs for IFNAR<sup>-/-</sup> mice versus C57BL/6J in untransduced lungs was

287 determined. Although virus replication (hACE2-lentivirus transduced lung) provided 192 DEGs, virus  
288 inoculation (untransduced lung) provided only 16 DEGs (Figure 5C). Thus again, virus inoculation had a  
289 limited effect on these analyses, with DEGs largely associated with virus infection.

290 Type III IFN is thought to act as a first-line of defense against infection at epithelial barriers, with  
291 the more potent and inflammatory type I IFN response kept in reserved in the event the first line of  
292 defense is breached (70, 71). As type III IFN signaling has been implicated in reducing SARS-CoV-2  
293 infection *in vitro* (72), the aforementioned analyses on day 2 was repeated in IL-28RA<sup>-/-</sup> mice. Viral reads  
294 were not significantly different between these two mouse strains (Figure 5D), confirming that knocking  
295 out type III IFN signaling was insufficient to significantly affect SARS-CoV-2 replication (69, 73). The  
296 DEG list for IL-28RA<sup>-/-</sup> versus C57BL/6J mice comprised 132 genes (Supplementary Table 4A-C), of  
297 which 84 were down-regulated (Figure 5D). Perhaps surprisingly, the DEGs were mostly different from  
298 that seen in IFNAR<sup>-/-</sup> mice (Figure 5D), arguing that the ISGs stimulated by type I and III IFNs are largely  
299 distinct.

300 The majority (90%) of the 178 down-regulated DEGs in IFNAR<sup>-/-</sup> versus C57BL/6J mice on day  
301 2 post infection were ISGs as defined by Interferome (using *in vivo* and mouse only settings) (Figure 5E,  
302 top and Supplementary Table 3D). Of the 84 down-regulated genes in IL-28RA<sup>-/-</sup> lungs, only 27% were  
303 identified as ISGs (Figure 5E, bottom and Supplementary Table 4D). However, there are no annotations  
304 in the Interferome database for type III ISGs in mice, and changing the settings to include human data  
305 (which is also under-annotated for type III IFN) did not increase the number of type III ISGs in our search  
306 using down DEGs from IL-28RA<sup>-/-</sup> lungs.

307 To determine the pathways regulated by type I and III IFN in response to SARS-CoV-2 infection,  
308 IPA USR analyses was performed on DEG lists from day 2 for hACE2-lentivirus transduced lungs for  
309 IFNAR<sup>-/-</sup> versus C57BL/6J (192 DEGs) and IL-28RA<sup>-/-</sup> versus C57BL/6J (132 DEGs). IPA USR  
310 signatures associated with pro-inflammatory cytokine signaling were significantly reduced in both  
311 IFNAR<sup>-/-</sup> and, to a lesser extent, IL-28RA<sup>-/-</sup> mice when compared to C57BL/6J mice (Figure 5F, full lists  
312 in Supplementary Table 3E and 4E). The USR annotations for type I and III IFN receptor deficiencies

313 were largely similar (Figure 5F), although they arose from a largely distinct set of DEGs (Figure 5D).  
314 This likely reflects expression of type I and type III IFN by different cell types with differing response  
315 profiles to the same cytokines (70).

316 Taken together these results illustrate that while there was no significant effects on viral  
317 replication, lungs from type I and type III IFN receptor knockout mice both had a significantly blunted  
318 acute pro-inflammatory response following SARS-CoV-2 infection. The importance of type I IFN for  
319 inflammation was reported previously using the AAV-hACE2 system (18).

320

### 321 **Immunization with infectious or UV-inactivated SARS-CoV-2 protects against virus infection**

322 To evaluate the utility of the hACE2-lentivirus mouse model of SARS-CoV-2 replication for vaccine  
323 studies, C57BL/6J mice were immunized twice subcutaneously (s.c.) with either infectious SARS-CoV-2  
324 or UV-inactivated SARS-CoV-2 (74) formulated with adjuvant (Figure 6A). Serum SARS-CoV-2  
325 neutralization titers were determined post-boost, and revealed all mice had significant serum  
326 neutralization titers (Figure 6B), comparable with the higher end levels seen in people with past SARS-  
327 CoV-2 infections (75). On day 2 post challenge all mice were sacrificed. All mouse lungs had detectable  
328 hACE2 mRNA by RT-qPCR, with levels higher in unvaccinated mice (Figure 6C), likely due to immune  
329 cell infiltrates (see below) diluting hACE2 mRNA. Mice immunized with either infectious or UV-  
330 inactivated SARS-CoV-2 showed significant reductions in viral RNA levels by RT-qPCR (Figure 6D) in  
331 tissue titrations (Figure 6E) and by RNA-Seq read counts (Figure 6F). These immunizations thus  
332 protected mice against significant viral infections and demonstrated the utility of hACE2-lentivirus  
333 transduced mice as a model for vaccine evaluation.

334 Lungs harvested on day 2 were also analyzed by RNA-Seq (Supplementary Table 5A-B), with  
335 1376 DEGs identified for infectious virus immunization versus unimmunized (DEGs in Supplementary  
336 Table 5C). The DEGs were analyzed by IPA canonical pathways, USR analysis, and the Diseases and  
337 Functions feature, which all showed infiltration signatures, dominated by T cell annotations  
338 (Supplementary Table 5D-F). This was confirmed by GSEA of human blood transcription modules (76)

339 against the pre-ranked (by fold change) gene list for immunized versus unvaccinated mice  
340 (Supplementary Table 5G). This showed the expected enrichment of T cell and B annotations in  
341 immunized mice (Figure 6F), and illustrated that protection against virus replication in lungs of  
342 immunized mice was associated with a significant infiltration of lymphocytes. This aligns with studies  
343 that suggest COVID-19 patients that induce an early SARS-CoV-2-specific T cell response have rapid  
344 viral clearance and mild disease (77).

345

## 346 **DISCUSSION**

347 Herein we describe a hACE2-lentivirus transduction system that allows the use of C57BL/6J and GM  
348 mice for SARS-CoV-2/COVID-19 research. Virus titer in hACE2-lentivirus transduced mice lung were  
349 comparable to other studies using mice transduced with Ad5 or AAV expressing hACE2 (10, 17, 18).  
350 These transduction methodologies avoid the fulminant brain infection seen in K18-hACE2 mice, with  
351 infection of this organ the major contributor to mortality in the K18-hACE2 model (78, 79). The key  
352 advantage of lentiviral over adenoviral systems is the integration of the lentiviral payload into the host cell  
353 genome, thereby providing long-term stable expression. The hACE2-lentivirus thus provides a new  
354 option for studying SARS-CoV-2 infection that can be readily applied using standard lentivirus  
355 technology. We characterize the lentivirus-hACE2 model of SARS-CoV-2 infection in C57BL/6J mice,  
356 and illustrate the use of lentivirus-hACE2 to assess the role of type I and type III IFNs in virus control and  
357 inflammatory responses using IFNAR<sup>-/-</sup> and IL-28RA<sup>-/-</sup> mice, respectively. We also illustrate the use of  
358 C57BL/6J mice transduced with lentivirus-hACE2 for SARS-CoV-2 vaccine evaluation.

359 The lentivirus-hACE2 C57BL/6J mouse model of SARS-CoV-2 infection shares many cytokine  
360 signatures with those seen in human COVID-19 patients; IL-2, IL-10, IL-6, TNF $\alpha$ , IL-4, IL-1 $\beta$ , IFN $\gamma$  and  
361 CSF3 signatures were found in SARS-CoV2-infected lentivirus-hACE2 transduced C57BL/6J mice on  
362 day 2 post infection, and elevated levels of these cytokines are found in COVID-19 patients (80, 81).  
363 Several of these cytokines have been implicated as mediators of COVID-19; for instance, IL-6 (82-84),  
364 IL-4 (53), IL-10 (85) and IFN $\gamma$  (86). On day 6 post infection the lentivirus-hACE2 C57BL/6J mouse

365 model showed a series of signatures associated with tissue repair. Thus our RNA-Seq analyses illustrated  
366 that this model involves an acute inflammatory disease followed by resolution and tissue repair.

367 hACE2-lentivirus transduction in IFNAR<sup>-/-</sup> and IL-28RA<sup>-/-</sup> mice was used to confirm that type I  
368 IFN signaling (18) and show that type III IFN signaling are involved in driving inflammatory responses.  
369 Virus replication was not significantly affected in IFNAR<sup>-/-</sup> and IL-28RA<sup>-/-</sup> mice, largely consistent with  
370 other studies using different model systems, which indicate that knocking out both pathways (STAT1<sup>-/-</sup>,  
371 STAT2<sup>-/-</sup>, or combined IFNAR<sup>-/-</sup>/IL-28RA<sup>-/-</sup>) is required before an impact on virus replication is seen (18,  
372 69, 73, 87). A high level of cross-compensation is thus implicated, as is described in influenza infection  
373 (71). *In vitro* experiments show that SARS-CoV-2 replication is sensitive to type I and III IFNs, although  
374 infection does not stimulate particularly high levels of IFN (72, 88, 89). A number of SARS-CoV-2  
375 encoded proteins inhibit IFN production and signaling (83, 90, 91). In infected cells, such inhibition of  
376 signaling would limit the antiviral activity of IFNs, as well as limiting the positive feedback amplification  
377 that is needed for high level IFN production (92). IFN therapies have been proposed for COVID-19  
378 patients (93) and such treatment may induce an antiviral state in uninfected cells, thereby perhaps limiting  
379 viral spread if given prophylactically or early during the course of infection (94). However, caution might  
380 be warranted for such therapy during later stage COVID-19 as type I and III IFN signaling are shown  
381 herein to drive inflammatory responses during SARS-CoV-2 infection, and are also known to have pro-  
382 inflammatory activities in other settings (92).

383 Herein we also illustrate the use of the hACE2-lentivirus system to study the role of ACE2  
384 residues on SARS-CoV-2 replication *in vitro*. Only four “mouse-to-human” changes in mACE2 (N30D,  
385 F83Y, N31K, H353K) enabled full SARS-CoV-2 replication to levels similar to those seen for infection  
386 of hACE2-expressing cells. These results suggest a CRISPR mouse with these substitutions would be  
387 able to support SARS-CoV-2 infection and provide a model of COVID-19. Remarkably, a minimum of  
388 only two substitutions in mACE2 (N31K, H353K) were sufficient for partial restoration of SARS-CoV-2  
389 infection. Changing the same residues in hACE2 to their mouse equivalents (K31N, K353H) did not affect  
390 virus replication compared to WT hACE2. Thus N31K and H353K allows binding of SARS-CoV2 to

391 mACE2, but K31N and K353H does not impair binding to hACE2. Both K31N and K353H substitutions  
392 were shown to be deleterious for SARS-CoV2 binding by *in silico* analyses. However, the same analyses  
393 implicated >25 other residues in hACE2 binding (31), with many of these potentially able to compensate  
394 for the loss of native residues at K31 and K353.

395 In conclusion, we describe the development of a mouse model using intranasal hACE2-lentivirus  
396 transduction to sensitize mice lung to SARS-CoV-2 infection, which recapitulated cytokine signatures  
397 seen in other mouse models and COVID-19. We demonstrate broad applicability of this new mouse  
398 model in vaccine evaluation, GM mice infection, and *in vitro* evaluation of ACE2 mutants.

### 399 **ACKNOWLEDGEMENTS**

400 We thank Dr I Anraku for his assistance in managing the PC3 (BSL3) facility at QIMR Berghofer MRI.  
401 We thank Dr Alyssa Pyke and Mr Fredrick Moore (Queensland Health, Brisbane) for providing the  
402 SARS-CoV-2 isolate. We thank Dr. David Harrich for providing the lentivirus vector system. We thank  
403 Dr. Simon Phipps for providing the IL-28RA<sup>-/-</sup> mice. We thank Monash Genome Modification Platform  
404 for providing the plasmid containing the mouse-codon optimized human ACE2 gene. We thank Clive  
405 Berghofer and Lyn Brazil (and many others) for their generous philanthropic donations to support SARS-  
406 CoV-2 research at QIMR Berghofer MRI. A.S. holds an Investigator grant from the National Health and  
407 Medical Research Council (NHMRC) of Australia (APP1173880).

408

### 409 **AUTHOR CONTRIBUTIONS**

410 Conceptualization, D.J.R.; Methodology, D.J.R. and A.S.; Formal analysis, D.J.R., A.S., and T.D.;  
411 Investigation, D.J.R., T.T.L., K.Y., B.T.; Data curation, D.J.R., A.S., and T.D.; Writing – original draft,  
412 D.J.R.; Writing – review and editing, A.S. and D.J.R.; Visualization, D.J.R., A.S., T.D., and C.B;  
413 Supervision, D.J.R. and A.S., Project administration, D.J.R. and A.S.; Funding acquisition, A.S. and  
414 D.J.R.

415



416 **DECLARATION OF INTERESTS**

417 The authors declare no competing interests.

418

419 **DATA AVAILABILITY**

420 All raw sequencing data (fastq files) are available from the Sequence Read Archive (SRA), BioProject  
421 accession: PRJNA701678. All other data is available within the paper and supporting information files.

422

423 **FIGURE LEGENDS**

424 **Figure 1. Mutational analyses of human and mouse ACE2 using ACE2-lentiviruses *in vitro*. A)**

425 Schematic of pCDH-EF1 $\alpha$ -ACE2-BGH-PGK-GFP-T2A-Puro lentiviral vector. **B-C)** Growth kinetics of  
426 SARS-CoV-2 over a three day time course in HEK293T cells transduced with WT or mutant hACE2 (**B**)  
427 or mACE2 (**C**) infected at MOI=0.1. Data is the mean of 1 (hACE2-T27Y/L79Y/N330Y and mACE2-  
428 N31K/H353K) or 2 (all others) independent experiments with 2-3 replicates in each and error bars  
429 represent SEM. Statistics was determined using Repeated Measures Two-Way ANOVA comparing  
430 untransduced (for B) or WT mACE2 (for C) with all others, and comparing mACE2-  
431 N30D/N31K/F83Y/H353K with mACE2-N31K/H353K. **D)** Inverted light microscopy images of  
432 HEK293T cells transduced with the indicated ACE2 lentivirus and infected with SARS-CoV-2 at  
433 MOI=0.1. Images were taken at day 3 post infection and were representative of triplicate wells. **E)**  
434 Crystal structure of the spike RBD:hACE2 complex (PBD: 6M0J) (95) viewed in PyMOL and zoomed in  
435 on key interactions between ACE2 residues identified in 'C-D' (hACE2 = blue, mACE2 = brown) and  
436 spike RBD residues (orange). Yellow dotted lines represent any contacts between chains within 3.5Å,  
437 and blue dotted lines represent polar contacts. Direction of black arrows indicate predicted enhanced  
438 interactions. **F)** K417N and N501Y mutations (magenta) were introduced in the spike RBD to mimic the  
439 Republic of South Africa (B.1.351 and 501Y.V2) and United Kingdom (B.1.1.7 and 501Y.V1) SARS-  
440 CoV-2 variants.

441

442 **Figure 2. SARS-CoV-2 replication in hACE2-lentivirus transduced C57BL/6J, IFNAR<sup>-/-</sup> and IL-**  
443 **28RA<sup>-/-</sup> mice lung. A)** Timeline of lentivirus transduction of mice lung and SARS-CoV-2 infection. **B)**  
444 Percent weight loss for mice in C-E. Data represents the mean percent weight loss from day 0 and error  
445 bars represent SEM. **C)** RT-qPCR of mice lung RNA using primers for hACE2 (introduced by lentivirus  
446 transduction) normalized to mRPL13a levels. Data is for individual mice and is expressed as RNA copy  
447 number calculated against a standard curve for each gene. Horizontal line indicates cut-off for reliable  
448 detection, with all untransduced mice falling below this line. Statistics are by Kolmogorov Smirnov test  
449 compared to untransduced samples. **D)** Titer of SARS-CoV-2 in mice lung determined using CCID<sub>50</sub>  
450 assay of lung homogenate. Horizontal line indicates the limit of detection of 1.57 log<sub>10</sub> CCID<sub>50</sub>/g.  
451 Statistics are by Kolmogorov Smirnov test compared to untransduced mice. IFNAR<sup>-/-</sup> versus  
452 untransduced mice at day 2 post infection reaches significance by Kruskal-Wallis test (p=0.018). **E)** RT-  
453 qPCR of mice lung RNA using primers for SARS-CoV-2 E gene normalized to mRPL13a levels. Data is  
454 individual mice and is expressed as RNA copy number calculated using a standard curve. Statistics are by  
455 Kolmogorov Smirnov test compared to untransduced mice. C57BL/6J hACE2-transduced versus  
456 untransduced mice at day 4 post infection reaches significance by Kruskal-Wallis test (p=0.046). See  
457 Supplementary Figure 2 for SARS-CoV-2 RNA copies normalised to hACE2 copies. **F)** SARS-CoV-2  
458 read counts (also see Supplementary Figure 3) normalized to hACE2 read counts from RNA-seq data for  
459 lentivirus-hACE2 transduced mice at day 2, K18-hACE2 transgenic mice at day 4, and Ad5-hACE2  
460 transduced mice at day 2 (43). Not significant by Kolmogorov Smirnov or Kruskal-Wallis tests.

461  
462 **Figure 3. SARS-CoV-2 replication in hACE2-lentivirus transduced mice lung induces**  
463 **inflammatory signatures by day 2 post-infection. A)** Volcano plot of gene expression from RNA-seq  
464 analyses of lung at day 2 comparing mice with and without hACE2-lentivirus transduction. Genes were  
465 considered DEGs if they had a FDR value < 0.05 (above horizontal dotted line) (see Supplementary Table  
466 1B-C for full gene and DEG lists). **B)** Interferome analysis of 95 up DEGs from 'A'. 38 of 95 up DEGs  
467 (40%) were ISGs. Red = type I IFN, blue = type II IFN, green = type III IFN (see Supplementary Table

468 1D for full Interferome ISG list). **C)** Cytokine signatures identified by IPA USR analysis (see  
469 Supplementary Table 1E-F for full and cytokine only USR lists) of 110 DEGs identified in ‘A’. Circle  
470 area reflects the number of DEGs associated with each USR annotation. USRs were grouped into three  
471 categories; red = Th1 associated, green = Th2 associated, blue = Th17 associated, and black =  
472 pleiotropic/other. The vertical dotted line indicates activation z-score of 0. **D)** GSEAs for cytokine-  
473 related DEGs or type I IFN-related DEGs from Winkler et al. supplemental data (9) against the pre-ranked  
474 all gene list (Supplementary Table 1B). Normalised enrichment score (NES) and nominal p-value are  
475 shown. **E)** IPA diseases and functions analysis (see Supplementary Table 1G-H for full lists) of 110  
476 DEGs identified in ‘A’. The 23 annotations with the most significant p-value and with an activation z-  
477 score of >2 were plotted with dots/lines indicating activation z-score and bars indicating  $-\log_{10}$  p-value.  
478 Annotations were grouped into two categories; cellular infiltration (blue) and innate responses (red). **F)**  
479 GSEA for DEGs from human COVID-19 lung versus healthy control from Blanco-Melo et al. (51)  
480 against the pre-ranked (by fold change) all gene list (Supplementary Table 1B). Normalised enrichment  
481 score (NES) and nominal p-value are shown. Core enriched genes (see Supplementary Table 1L for full  
482 core enriched gene list) determined by GSEA were entered into Enrichr and the top 10 GO Biological  
483 Processes annotations sorted by p-value are shown (see Supplementary Table 1M for full GO processes  
484 list).

485  
486 **Figure 4. Day 6 post-infection is characterized by inflammation resolution and tissue repair**  
487 **signatures.** **A)** Venn diagram for DEGs comparing day 6 versus 2 post infection with (red) and without  
488 (green) hACE2-lentivirus transduction. Number of DEGs that are FDR<0.05 are shown. Mean virus titer  
489 ( $\log_{10}$  CCID<sub>50</sub>/g) in lung tissue  $\pm$  SEM (represents data shown in Figure 2D) is shown for hACE2  
490 transduced mice at day 2 or 6 post infection. **B)** Volcano plot of gene expression from RNA-seq analyses  
491 of hACE2-lentivirus transduced lung RNA comparing day 6 with day 2 (see Supplementary Table 2B-C  
492 for gene and DEG lists). Genes were considered DEGs if they had a FDR value < 0.05 (above horizontal  
493 dotted line). **C)** Cytokine signatures identified by IPA USR analysis (see Supplementary Table 2D-E for

494 full and cytokine only lists) of 551 DEGs identified in ‘B’ (Supplementary Table 2C). Circle area reflects  
495 the number of DEGs associated with each USR annotation. USRs were grouped into four categories; red  
496 = Th1 associated, green = Th2 associated, blue = Th17 associated, and black = pleiotropic/other. The  
497 vertical dotted line indicates activation z-score of 0. **D)** Upregulated USR signatures identified using IPA  
498 analysis (see Supplementary Table 2F) of 551 DEGs identified in ‘B’. Circle area reflects the number of  
499 DEGs associated with each USR annotation. USRs (excluding chemicals) with an activation z-score of >2  
500 are shown and were grouped into five categories; green = B cell function, blue = tissue repair – endocrine  
501 signaling, orange = tissue repair – growth factor, red = tissue repair – kinase, purple = tissue repair – Wnt  
502 signaling. **E)** Selected plots from GSEA of entire MSigDB database using pre-ranked (by fold change)  
503 ‘all’ gene list (Supplementary Table 2B). NES score and p-value is shown for the  
504 “GO\_inflammatory\_response” and  
505 “Wp\_Genes\_Related\_To\_Primary\_Cilium\_Development\_Based\_On\_Crispr” annotations.

506  
507 **Figure 5. Type I and III IFN signaling is required for SARS-CoV-2-induced lung inflammation. A)**  
508 Venn diagram for number of DEGs (FDR<0.05) between IFNAR<sup>-/-</sup> versus C57BL/6J mice at day 2 or day  
509 6 (green). Mean log<sub>10</sub> SARS-CoV-2 read count in RNA-seq data ± SEM is shown (red text = day 2, green  
510 text = day 6). **B)** Venn diagram for number of DEGs (FDR<0.05) between plus versus minus hACE2-  
511 lentivirus transduction comparing C57BL/6J (red) and IFNAR<sup>-/-</sup> (green) mice at day 2. **C)** Venn diagram  
512 for IFNAR<sup>-/-</sup> versus C57BL/6J mice at day 2 comparing hACE2-lentivirus transduced (red) or  
513 untransduced (green) mice. **D)** Venn diagram comparing IFNAR<sup>-/-</sup> versus C57BL/6J (red) and IL-28RA<sup>-/-</sup>  
514 versus C57BL/6J (blue) (see Supplementary Table 3B-C and 4B-C for full gene and DEG lists) mice at  
515 day 2 (all mice had received hACE2-lentivirus transduction). Mean log<sub>10</sub> SARS-CoV-2 read count in  
516 RNA-seq data ± SEM is shown (red text = IFNAR<sup>-/-</sup>, black text = C57BL/6J, blue text = IL-28RA<sup>-/-</sup>). **E)**  
517 Interferome analysis of down DEGs from ‘D’. See supplementary Table 3D and 4D for full Interferome  
518 ISG list. **F)** Signatures identified using IPA USR analysis of DEGs identified in ‘D’ for IFNAR<sup>-/-</sup> versus  
519 C57BL/6J (red) and IL-28RA<sup>-/-</sup> versus C57BL/6J (blue). Circle area reflects the number of DEGs

520 associated with each USR annotation. Signatures were selected focusing on data previously identified in  
521 'Figure 3C' (entire list is in Supplementary Table 3E and 4E).

522

523 **Figure 6. Immunization with infectious or UV-inactivated SARS-CoV-2 protects against virus**

524 **infection.** **A)** Timeline of mice immunization, lentivirus transduction and SARS-CoV-2 infection. **B)**

525 Reciprocal 50% neutralization titers of naïve mice and infectious or UV SARS-CoV-2 immunized mice.

526 Horizontal dotted line represents the limit of detection (1 in 10). Statistics are by Kolmogorov Smirnov

527 test. **C)** RT-qPCR of mice lung RNA using primers for hACE2 introduced by lentivirus transduction

528 normalized to mRPL13a levels. Data is individual mice and is expressed as RNA copy number calculated

529 against a standard curve for each gene. Horizontal line indicates cut-off for reliable detection, with all

530 hACE2-negative mice falling below this line. Statistics are by Kolmogorov Smirnov test. **D)** RT-qPCR

531 of mice lung RNA using primers for SARS-CoV-2 E gene normalized to mRPL13a levels. Data is

532 individual mice and is expressed as RNA copy number calculated against a standard curve for each gene.

533 Statistics are by Kolmogorov Smirnov test. Unvaccinated versus UV-inactive CoV-2 vaccinated reaches

534 significance by Kruskal-Wallis test ( $p=0.034$ ). **E)** Titer of SARS-CoV-2 in mice lung determined using

535 CCID<sub>50</sub> assay of lung homogenate. Horizontal line indicates the limit of detection of 1.57 log<sub>10</sub> CCID<sub>50</sub>/g.

536 Statistics are by Kolmogorov Smirnov test. Unvaccinated versus UV-inactive CoV-2 vaccinated reaches

537 significance by Kruskal-Wallis test ( $p=0.028$ ). **F)** Mean log<sub>10</sub> SARS-CoV-2 read count at day 2 post-

538 infection in RNA-seq data  $\pm$  SEM is shown (blue text = unvaccinated mice, red text = infectious SARS-

539 CoV-2 immunized mice). GSEA for Blood Transcription Modules (BTMs) from Li et al. (76) against the

540 pre-ranked all gene list comparing unvaccinated versus infectious SARS-CoV-2 immunized (s.c) mice

541 lung at day 2 (all mice had hACE2-lentivirus transduction). Selected BTM modules with a positive NES

542 score and  $p < 0.05$  are shown (full list in Supplementary Table 5). See Supplementary Table 5 for full

543 gene and DEG lists and full downstream analyses lists.

544

545

## 546 **MATERIALS and METHODS**

### 547 **Ethics statement**

548 All mouse work was conducted in accordance with the “Australian code for the care and use of animals  
549 for scientific purposes” as defined by the National Health and Medical Research Council of Australia.  
550 Mouse work was approved by the QIMR Berghofer Medical Research Institute animal ethics committee  
551 (P3600, A2003-607). For intranasal inoculations, mice were anesthetized using isoflurane. Mice were  
552 euthanized using CO<sub>2</sub> or cervical dislocation.

553

### 554 **Cell lines and SARS-CoV-2 culture**

555 Vero E6 (C1008, ECACC, Wiltshire, England; Sigma Aldridge, St. Louis, MO, USA), HEK293T (a gift  
556 from Michel Rist, QIMR Berghofer), Lenti-X 293T (Takara Bio), AE17 (a gift from Delia Nelson,  
557 Faculty of Health Sciences, Curtin Medical School), and NIH-3T3 (American Type Culture Collection,  
558 ATCC, CRL-1658) cells were cultured in medium comprising DMEM for Lenti-X 293T cells or  
559 RPMI1640 for all others (Gibco) supplemented with 10% fetal calf serum (FCS), penicillin  
560 (100 IU/ml)/streptomycin (100 µg/ml) (Gibco/Life Technologies) and L-glutamine (2 mM) (Life  
561 Technologies). Cells were cultured at 37°C and 5% CO<sub>2</sub>. Cells were routinely checked for mycoplasma  
562 (MycoAlert Mycoplasma Detection Kit MycoAlert, Lonza) and FCS was assayed for endotoxin  
563 contamination before purchase (96). The SARS-CoV-2 isolate was kindly provided by Queensland  
564 Health Forensic & Scientific Services, Queensland Department of Health, Brisbane, Australia. The virus  
565 (hCoV-19/Australia/QLD02/2020) was isolated from a patient and sequence deposited at GISAID  
566 (<https://www.gisaid.org/>; after registration and login, sequence can be downloaded from  
567 <https://www.epicov.org/epi3/frontend#1707af>). Virus stock was generated by infection of Vero E6 cells  
568 at multiplicity of infection (MOI)≈0.01, with supernatant collected after 2-3 days, cell debris removed by  
569 centrifugation at 3000 x g for 15 min at 4°C, and virus aliquoted and stored at -80°C. Virus titers were  
570 determined using standard CCID<sub>50</sub> assays (see below). The virus was determined to be mycoplasma free  
571 using co-culture with a non-permissive cell line (i.e. HeLa) and Hoechst staining as described (97).

572

573 **CCID<sub>50</sub> assays**

574 Vero E6 cells were plated into 96 well flat bottom plates at  $2 \times 10^4$  cells per well in 100  $\mu$ l of medium. For  
575 tissue titer, tissue was homogenized in tubes each containing 4 ceramic beads twice at 6000 x g for 15  
576 seconds, followed by centrifugation twice at 21000 x g for 5 min before 5 fold serial dilutions in 100  $\mu$ l  
577 RPMI1640 supplemented with 2% FCS. For cell culture supernatant, 10 fold serial dilutions were  
578 performed in 100  $\mu$ l RPMI1640 supplemented with 2% FCS. 100  $\mu$ l of serially diluted samples were  
579 added to Vero E6 cells and the plates cultured for 5 days at 37°C and 5% CO<sub>2</sub>. The virus titer was  
580 determined by the method of Spearman and Karber (a convenient Excel CCID<sub>50</sub> calculator is available at  
581 [https://www.klinikum.uni-heidelberg.de/zentrum-fuer-infektiologie/molecular-](https://www.klinikum.uni-heidelberg.de/zentrum-fuer-infektiologie/molecular-virology/welcome/downloads)  
582 [virology/welcome/downloads](https://www.klinikum.uni-heidelberg.de/zentrum-fuer-infektiologie/molecular-virology/welcome/downloads)).

583

584 **Lentivirus cloning**

585 ACE2 genes were cloned into pCDH-EF1 $\alpha$ -MCS-BGH-PGK-GFP-T2A-Puro Cloning and Expression  
586 Lentivector (System Biosciences, catalogue number CD550A-1), where the EF1 $\alpha$  promoter was replaced  
587 with the full length EF1 $\alpha$  using NheI and ClaI restriction enzymes (New England Biolabs). Human ACE2  
588 coding sequence (codon optimized for mouse) was cloned into the pCDH lentivector with PCR fragments  
589 amplified using Q5® High-Fidelity 2X Master Mix (New England Biolabs) and the following primers;  
590 vector backbone (pCDH amplified with Forward 5' - TAAATCGGATCCGCGG -3' and Reverse 5' -  
591 AATTCGAATTCGCTAGC) and hACE2 insert (Forward 5' -  
592 GCTAGCGAATTCGAATTATGAGCAGCAGCTCTTGGC -3' and Reverse 5' -  
593 CCGCGGATCGCATTATCAGAAGCTTGTCTGCACGT -3'). The pCDH fragment was digested with  
594 DpnI (New England Biolabs) and was purified using QIAquick Gel Extraction Kit (QIAGEN), as was the  
595 hACE2 fragment. Fragments were recombined using NEBuilder HiFi DNA Assembly Cloning Kit as per  
596 manufacturer instructions. This was transformed into NEB® 10-beta Competent E. coli (High Efficiency)  
597 (New England Biolabs) as per manufacturer instructions and plated on ampicillin agar plates overnight.

598 Colony PCR was performed using Q5 High-Fidelity 2X Master Mix (New England Biolabs) and the  
599 hACE2 insert primers to identify a positive colony, which was grown in LB broth with ampicillin and  
600 plasmid was purified using NucleoBond Xtra Midi kit (Machery Nagel).  
601 All ACE2 mutant coding sequences were ordered from Twist Bioscience/Decode Science containing  
602 EcoRI upstream and BamHI downstream. Fragments were amplified using the using Q5® High-Fidelity  
603 2X Master Mix (New England Biolabs) and the following primers; Forward 5’-  
604 CCTGACCTTAGCGAATTCATG -3’ and Reverse 5’- ACCTAGCCTCGCGGATC -3’. PCR fragments  
605 were purified using Monarch DNA Gel Extraction Kit (New England Biolabs), and were digested with  
606 EcoRI and BamHI (New England Biolabs), as was the pCDH vector before purification again with  
607 Monarch® DNA Gel Extraction Kit (New England Biolabs). The ACE2 fragment was ligated with  
608 pCDH vector using T4 DNA Ligase (New England Biolabs) as per manufacturer instructions and then  
609 transformed into NEB® 10-beta Competent E. coli (High Efficiency) (New England Biolabs) as per  
610 manufacturer instructions and plated on ampicillin agar plates overnight. Colonies were grown in LB  
611 broth with ampicillin and plasmid was purified using NucleoBond Xtra Midi kit (Machery Nagel).  
612 Plasmids were confirmed by PCR with the cloning primers above and fragments were gel purified and  
613 confirmed by Sanger sequencing with the forward primer.

614

### 615 **Lentivirus production, titration and cell line transduction**

616 ACE2 lentivirus was produced by co-transfection of HEK293T or Lenti-X HEK293T cells with the  
617 pCDH-ACE2 plasmid, VSV-G and Gag-Pol using Lipofectamine 2000 Reagent (Thermo Fisher  
618 Scientific) or Xfect Transfection Reagent (Takara Bio) as per manufacturer instructions. Supernatant was  
619 collected 2 days after transfection and centrifuged at 500 x g for 10 min, and this was concentrated using  
620 Amicon Ultra-15 Centrifugal Filter Units with 100 kDa cutoff (Merck Millipore) as per manufacturer  
621 instructions. Lentivirus was titrated by serial dilution of lentivirus and incubating with 5000 HEK293T  
622 cells in 96 well plates with 8 µg/ml polybrene for 3 days followed by GFP detection by flow cytometry  
623 (BD Biosciences LSRFortessa). Transduction units (TU) per ml was calculated by percentage of 5000



624 cells that are GFP positive multiplied by the dilution. For example if 2  $\mu$ l lentivirus gives 5% GFP  
625 positive cells, the TU/ml is  $((5/100)*5000) * (1000/2) = 125,000$  TU/ml. The p24 equivalent (ng/ml) was  
626 measured using Lenti-X GoStix Plus (Takara Bio) as per manufacturer instructions.  
627 Cell lines were transduced by incubating with lentivirus and 8  $\mu$ g/ml polybrene for 2-3 days followed by 5  
628  $\mu$ g/ml puromycin treatment until most resistant cells expressed GFP. Cells were then infected with  
629 SARS-CoV-2 at MOI 0.1 for 1 hr at 37°C, cells were washed with PBS and media replaced. Culture  
630 supernatant was harvested at the indicated timepoints and titered by CCID<sub>50</sub> assay as described.

631

### 632 **SARS-CoV-2 spike RBD:ACE2 mutagenesis modeling**

633 PyMOL v4.60 (Schrodinger) was used for mutagenesis of the crystal structure of SARS-CoV-2 spike  
634 receptor-binding domain bound with ACE2 from the protein data bank (6M0J) (95). The side chain  
635 orientation (rotamer) with highest frequency of occurrence in proteins was chosen for all mutations. Polar  
636 interactions (blue lines) or any interactions within 3.5Å (yellow lines) were shown for selected residues.  
637 The K417N and N501Y mutations in the UK variant (B.1.1.7) and RSA variant (B.1.351) were introduced  
638 (38).

639

### 640 **UV-inactivated SARS-CoV-2 vaccine preparation and mice immunization**

641 120 ml of SARS-CoV-2 was inactivated with at least 7650 J/m<sup>2</sup> UVC in a UVC 500 Ultraviolet  
642 Crosslinker (Hoefer). Virus was determined to be inactivated by incubation with Vero E6 cells for 4 days  
643 without development of CPE. UV-inactive SARS-CoV-2 was then partially-purified using a 20% sucrose  
644 cushion centrifuged at 175,000 x g for 3-4 hr using SW32Ti rotor (Beckman Coulter). The sample that  
645 has passed through the sucrose was collected and concentrated using Amicon Ultra-15 Centrifugal Filter  
646 Units with 100 kDa cutoff (Merck Millipore). For infectious SARS-CoV-2 immunization, virus was also  
647 concentrated using Amicon Ultra-15 Centrifugal Filter Units with 100 kDa cutoff (Merck Millipore).  
648 Mice were injected s.c. in the base of the tail with 100  $\mu$ l of UV-inactive or infectious SARS-CoV-2 with  
649 25  $\mu$ g adjuvant in 50  $\mu$ l made with the same ingredients as AS01 (98) as described previously (99). A

650 boost was given 5-6 weeks after prime, and mice were bled to measure serum neutralizing titers 4-9  
651 weeks after boost.

652

### 653 **Neutralization assay**

654 Mouse serum was heat inactivated at 56°C for 30 min and incubated with 100 CCID<sub>50</sub> SARS-CoV-2 for 2  
655 hr at 37°C before adding 10<sup>5</sup> Vero cells/well in a 96 well plate to 200 µl. After 4 days cells were fixed and  
656 stained by adding 50 µl formaldehyde (15% w/v) and crystal violet (0.1% w/v) (Sigma-Aldrich)  
657 overnight. The plates were washed in tap water, dried overnight and 100 µl/well of 100% methanol added  
658 to dissolve the crystal violet and the OD was read at 595 nm using a 96-well plate reader (Biotek Synergy  
659 H4). The 50% neutralizing titers were interpolated from optical density (OD) versus dilution plots.

660

### 661 **Mice intranasal lentivirus transduction and SARS-CoV-2 infection**

662 C57BL/6J, IFNAR<sup>-/-</sup> (100) (originally provided by P. Hertzog, Monash University, Melbourne, VIC,  
663 Australia) and IL-28RA<sup>-/-</sup> mice (71, 101) were kindly provided by Bristol-Myers Squibb (102) and bred  
664 in-house at QIMRB. Female mice were 8 weeks to 1 year old (age matched between groups) at the start  
665 of the experiment. Mice were anesthetized using isoflurane and 4 µl of 1% L- $\alpha$ -Lysophosphatidylcholine  
666 from egg yolk (Sigma Aldrich) in water was administered intranasally. After 1 hour mice were inoculated  
667 intranasally with approximately 2×10<sup>4</sup> TU of hACE2-pCDH lentivirus in 50 µl, and 1 week later  
668 challenged with 10<sup>5</sup> CCID<sub>50</sub> SARS-CoV-2 intranasally in 50 µl. Mice were sacrificed by cervical  
669 dislocation at day 2, 4 or 6 and lungs were collected. Right lung was immediately homogenized in tubes  
670 each containing 4 beads twice at 6000 x g for 15 seconds, and used in tissue titration as described above.  
671 Left lung was placed in RNAprotect Tissue Reagent (QIAGEN) at 4°C overnight then -80°C.

672 K18-hACE2 mice (6) were purchased from The Jackson Laboratory and bred in-house at QIMRB with  
673 C57BL/6J mice. Mice were genotyped using Extract-N-Amp Tissue PCR Kit (Sigma Aldrich) according

674 to manufacturer instructions with the following primers; Forward 5'-CTTGGTGATATGTGGGGTAGA-  
675 3' and Reverse 5'-CGCTTCATCTCCCACCACTT-3'. hACE2 positive mice were infected with  $5 \times 10^4$   
676 SARS-CoV-2 i.n. as above and lung RNA was harvested at day 4 for RNA-seq.

677

#### 678 **RT-qPCR**

679 Mice lung was transferred from RNAlater to TRIzol (Life Technologies) and was homogenized twice at  
680 6000 x g for 15 sec. Homogenates were centrifuged at  $14,000 \times g$  for 10 min and RNA was isolated as  
681 per manufacturer's instructions. cDNA was synthesized using ProtoScript II First Strand cDNA Synthesis  
682 Kit (New England Biolabs) and qPCR performed using iTaq Universal SYBR Green Supermix (Bio-Rad)  
683 as per manufacturer instructions with the following primers; SARS-CoV-2 E Forward 5'-  
684 ACAGGTACGTTAATAGTTAATAGCGT -3' and Reverse 5'- ATATTGCAGCAGTACGCACACA,  
685 hACE2 Forward 5'- GATCACGATTCCCAGGACG -3' and Reverse 5'- TCCGGCTGAACGACAACCTC  
686 -3', mRPL13a (103) Forward 5'- GAGGTTCGGGTGGAAGTACCA -3' and Reverse 5'-  
687 TGCATCTTGGCCTTTTCCTT -3'. PCR fragments of SARS-CoV-2 E, ACE2 and mRPL13a using the  
688 same primers as above were gel purified and 10-fold serial dilutions of estimated copy numbers were used  
689 as standards in qPCR to calculate copies in samples reactions. SARS-CoV-2 E and ACE2 copies were  
690 normalized by mRPL13a copy number in each reaction. qPCR reactions were performed in duplicate and  
691 averaged to determine the copy number in each sample.

692

#### 693 **RNA-seq**

694 TRIzol extracted lung RNA was treated with DNase (RNase-Free DNase Set (Qiagen)) followed by  
695 purification using RNeasy MinElute Cleanup Kit (QIAGEN) as per manufacturer instructions. RNA  
696 concentration and quality was measured using TapeStation D1K TapeScreen assay (Agilent). cDNA  
697 libraries were prepared using the Illumina TruSeq Stranded mRNA library prep kit and the sequencing  
698 performed on the Illumina Nextseq 550 platform generating 75bp paired end reads. Per base sequence  
699 quality for >90% bases was above Q30 for all samples. The quality of raw sequencing reads was assessed

700 using FastQC (104) (v0.11.8) and trimmed using Cutadapt (105) (v2.3) to remove adapter sequences and  
701 low-quality bases. Trimmed reads were aligned using STAR (106) (v2.7.1a) to a combined reference that  
702 included the mouse GRCm38 primary assembly and the GENCODE M23 gene model (107), SARS-CoV-  
703 2 isolate Wuhan-Hu-1 (NC\_045512.2; 29903 bp) and the human ACE2 mouse codon optimized sequence  
704 (2418 bp). Mouse gene expression was estimated using RSEM (108) (v1.3.0). Reads aligned to SARS-  
705 CoV-2 and hACE2 were counted using SAMtools (109) (v1.9). Differential gene expression in the mouse  
706 was analyzed using EdgeR (3.22.3) and modelled using the likelihood ratio test, glmLRT().

707

### 708 **Analyses of K18-hACE2 and Ad5-hACE2 RNA-seq data**

709 RNA-seq datasets generated from the Winkler et al. study (9), and Sun et al. study (43) were obtained  
710 from the Gene Expression Omnibus (GSE154104 and GSE150847 respectively) and trimmed using  
711 Cutadapt (v2.3). Trimmed reads were aligned using STAR (v2.7.1a) to a combined reference that  
712 included the mouse GRCm38 primary assembly and the GENCODE M23 gene model, SARS-CoV-2  
713 isolate Wuhan-Hu-1 (NC\_045512.2; 29903 bp) and the human ACE2 transcript variant 1  
714 (NM\_001371415.1; 3339 bp). Mouse gene expression was estimated using RSEM (v1.3.0). Reads  
715 aligned to SARS-CoV-2 and hACE2 were counted using SAMtools (v1.9). Differential gene expression  
716 in the mouse was analyzed using EdgeR (3.22.3) and modelled using the likelihood ratio test, glmLRT().

717

### 718 **Pathway Analysis**

719 Up-Stream Regulators (USR), Diseases and Functions and canonical pathways enriched in differentially  
720 expressed genes in direct and indirect interactions were investigated using Ingenuity Pathway Analysis  
721 (IPA) (QIAGEN).

722

### 723 **Network Analysis**

724 Protein interaction networks of differentially expressed gene lists were visualized in Cytoscape (v3.7.2)  
725 (110). Enrichment for biological processes, molecular functions, KEGG pathways and other gene

726 ontology categories in DEG lists was elucidated using the STRING database (111) and GO enrichment  
727 analysis (112).

728

### 729 **Gene Set Enrichment Analysis**

730 Preranked GSEA (113) was performed on a desktop application (GSEA v4.0.3)

731 (<http://www.broadinstitute.org/gsea/>) using the “GSEAPreranked” module. Gene sets from the

732 supplemental materials from the Winkler et al. (9), Blanco-Melo et al. (51) and Wu et al. (52)

733 (filename.GMT) studies were investigated for enrichment in our pre-ranked all gene list for SARS-CoV-2

734 infected day 2 mice lung comparing plus versus minus ACE2 (Supplementary Table 2B). Li et al. (76)

735 blood transcription modules (BTM\_for\_GSEA\_20131008.gmt, n = 346) was also used in GSEA to

736 determine enrichment in our ‘immunized’ versus unvaccinated mice lung at day 2 (Supplementary Table

737 5B). The complete Molecular Signatures Database (MSigDB) v7.2 gene set collection (31,120 gene sets)

738 (msigdb.v7.2.symbols.gmt: <https://www.gsea->

739 [msigdb.org/gsea/msigdb/download\\_file.jsp?filePath=/msigdb/release/7.2/msigdb.v7.2.symbols.gmt](https://www.gsea-msigdb.org/gsea/msigdb/download_file.jsp?filePath=/msigdb/release/7.2/msigdb.v7.2.symbols.gmt)) was

740 used to run GSEAs on pre-ranked gene list for plus versus minus ACE2 at day 2 (Supplementary Table

741 1B), and day 6 versus day 2 (Supplementary Table 2B). Gene ontology (114, 115) and Enrichr (116, 117)

742 web-tools were also consulted.

743

### 744 **Interferome**

745 The indicated DEG lists were entered into Interferome ([www.interferome.org](http://www.interferome.org)) (118) with the following

746 parameters: *In Vivo*, Mus musculus, fold change 2 (up and down).

747

### 748 **Statistics**

749 Statistical analyses of experimental data were performed using IBM SPSS Statistics for Windows,

750 Version 19.0 (IBM Corp., Armonk, NY, USA). The t-test was used when the difference in variances was

751 <4, skewness was >2 and kurtosis was <2. Otherwise, the non-parametric Kolmogorov–Smirnov test or

752 Kruskal-Wallis test was used. Repeated Measures Two-Way ANOVA was used where indicated.

753

## 754 **SUPPLEMENTAL INFORMATION**

### 755 **Supplementary Figure 1. Replication of SARS-CoV-2 in hACE2-lentivirus transduced mouse cell**

756 **lines.** Growth kinetics of SARS-CoV-2 over a three day time course in untransduced or hACE2-lentivirus  
757 transduced 3T3 or AE17 cells infected at MOI=0.1. Data is the mean of triplicate wells and error bars  
758 represent SEM. Images of cells were taken using an inverted light microscope at day 3 post-infection and  
759 are representative of triplicate wells.

760

761 **Supplementary Figure 2. RT-qPCR of mice lung RNA using primers for SARS-CoV-2 normalized**  
762 **to hACE2 introduced by lentivirus transduction.** Data is individual mice from Figure 2E normalised  
763 to 2C, and is expressed as RNA copy number calculated against a standard curve for each gene.

764

765 **Supplementary Figure 3. SARS-CoV-2 and hACE2 read counts in RNA-Seq data.** RNA-Seq was  
766 performed on mice lung from the same mice as in 'Figure 2'. **A)** SARS-CoV-2 read counts normalized to  
767 total read count. Data points below the horizontal dotted line had read counts of zero. **B)** hACE2 read  
768 counts normalised to total read count. Data points below the horizontal dotted line had read counts of  
769 zero. **C)** SARS-CoV-2 read count normalised to hACE2 read count. Circle with pink dotted outline had  
770 hACE2 read count of 0, so the value was set to the SARS-CoV-2 read count (not normalised). **D)** SARS-  
771 CoV-2 reads aligned to reference genome viewed in Integrative Genome Viewer (IGV). Mice with  
772 hACE2 displayed reads mapped across the entire genome, with higher counts for structural gene sub-  
773 genomic RNA as also evident in hACE2-adenoviral vector transduced cell lines (51).

774

775 **Supplementary Table 1. RNA-Seq gene lists and downstream bioinformatic analyses of responses**  
776 **at day 2 post-infection.**

777

778 **Supplementary Table 2. RNA-Seq gene lists and downstream bioinformatic analyses of responses**  
779 **at day 6 post-infection.**

780

781 **Supplementary Table 3. RNA-Seq gene lists and downstream bioinformatic analyses of responses**  
782 **in IFNAR<sup>-/-</sup> versus C57BL/6J mice at day 2 post-infection.**

783

784 **Supplementary Table 4. RNA-Seq gene lists and downstream bioinformatic analyses of responses**  
785 **in IL-28RA<sup>-/-</sup> versus C57BL/6J mice at day 2 post-infection.**

786

787 **Supplementary Table 5. RNA-Seq gene lists and downstream bioinformatic analyses of responses**  
788 **in immunized versus unvaccinated mice at day 2 post-infection.**

789

## 790 **REFERENCES**

791

- 792 1. Wu F, Zhao S, Yu B, Chen Y-M, Wang W, Song Z-G, et al. A new coronavirus associated with  
793 human respiratory disease in China. *Nature*. 2020;579(7798):265-9. doi: 10.1038/s41586-020-2008-3.
- 794 2. Guan W-j, Ni Z-y, Hu Y, Liang W-h, Ou C-q, He J-x, et al. Clinical Characteristics of Coronavirus  
795 Disease 2019 in China. *New England Journal of Medicine*. 2020;382(18):1708-20. doi:  
796 10.1056/NEJMoa2002032.
- 797 3. Muñoz-Fontela C, Dowling WE, Funnell SGP, Gsell P-S, Riveros-Balta AX, Albrecht RA, et al.  
798 Animal models for COVID-19. *Nature*. 2020;586(7830):509-15. doi: 10.1038/s41586-020-2787-6.
- 799 4. Zhao X, Chen D, Szabla R, Zheng M, Li G, Du P, et al. Broad and Differential Animal Angiotensin-  
800 Converting Enzyme 2 Receptor Usage by SARS-CoV-2. *Journal of virology*. 2020;94(18). doi:  
801 10.1128/jvi.00940-20.
- 802 5. Zhou P, Yang X-L, Wang X-G, Hu B, Zhang L, Zhang W, et al. A pneumonia outbreak associated  
803 with a new coronavirus of probable bat origin. *Nature*. 2020;579(7798):270-3. doi: 10.1038/s41586-020-  
804 2012-7.
- 805 6. McCray PB, Jr., Pewe L, Wohlford-Lenane C, Hickey M, Manzel L, Shi L, et al. Lethal infection of  
806 K18-hACE2 mice infected with severe acute respiratory syndrome coronavirus. *Journal of virology*.  
807 2007;81(2):813-21. doi: 10.1128/jvi.02012-06.
- 808 7. Golden JW, Cline CR, Zeng X, Garrison AR, Carey BD, Mucker EM, et al. Human angiotensin-  
809 converting enzyme 2 transgenic mice infected with SARS-CoV-2 develop severe and fatal respiratory  
810 disease. *JCI insight*. 2020. doi: 10.1172/jci.insight.142032.

- 811 8. Moreau GB, Burgess SL, Sturek JM, Donlan AN, Petri WA, Mann BJ. Evaluation of K18-hACE2  
812 Mice as a Model of SARS-CoV-2 Infection. *The American journal of tropical medicine and hygiene*.  
813 2020;103(3):1215-9. doi: 10.4269/ajtmh.20-0762.
- 814 9. Winkler ES, Bailey AL, Kafai NM, Nair S, McCune BT, Yu J, et al. SARS-CoV-2 infection of human  
815 ACE2-transgenic mice causes severe lung inflammation and impaired function. *Nature immunology*.  
816 2020. doi: 10.1038/s41590-020-0778-2.
- 817 10. Rathnasinghe R, Strohmeier S, Amanat F, Gillespie VL, Krammer F, García-Sastre A, et al.  
818 Comparison of Transgenic and Adenovirus hACE2 Mouse Models for SARS-CoV-2 Infection. *Emerging*  
819 *microbes & infections*. 2020:1-19. doi: 10.1080/22221751.2020.1838955.
- 820 11. Oladunni FS, Park J-G, Pino PA, Gonzalez O, Akhter A, Allué-Guardia A, et al. Lethality of SARS-  
821 CoV-2 infection in K18 human angiotensin-converting enzyme 2 transgenic mice. *Nature*  
822 *Communications*. 2020;11(1):6122. doi: 10.1038/s41467-020-19891-7.
- 823 12. Yinda CK, Port JR, Bushmaker T, Offei Owusu I, Purushotham JN, Avanzato VA, et al. K18-hACE2  
824 mice develop respiratory disease resembling severe COVID-19. *PLoS Pathog*. 2021;17(1):e1009195. doi:  
825 10.1371/journal.ppat.1009195.
- 826 13. Bao L, Deng W, Huang B, Gao H, Liu J, Ren L, et al. The pathogenicity of SARS-CoV-2 in hACE2  
827 transgenic mice. *Nature*. 2020;583(7818):830-3. doi: 10.1038/s41586-020-2312-y.
- 828 14. Sun SH, Chen Q, Gu HJ, Yang G, Wang YX, Huang XY, et al. A Mouse Model of SARS-CoV-2  
829 Infection and Pathogenesis. *Cell host & microbe*. 2020;28(1):124-33.e4. doi:  
830 10.1016/j.chom.2020.05.020.
- 831 15. Jiang R-D, Liu M-Q, Chen Y, Shan C, Zhou Y-W, Shen X-R, et al. Pathogenesis of SARS-CoV-2 in  
832 Transgenic Mice Expressing Human Angiotensin-Converting Enzyme 2. *Cell*. 2020;182(1):50-8.e8. doi:  
833 10.1016/j.cell.2020.05.027.
- 834 16. Tseng CT, Huang C, Newman P, Wang N, Narayanan K, Watts DM, et al. Severe acute respiratory  
835 syndrome coronavirus infection of mice transgenic for the human Angiotensin-converting enzyme 2  
836 virus receptor. *Journal of virology*. 2007;81(3):1162-73. doi: 10.1128/jvi.01702-06.
- 837 17. Hassan AO, Case JB, Winkler ES, Thackray LB, Kafai NM, Bailey AL, et al. A SARS-CoV-2 Infection  
838 Model in Mice Demonstrates Protection by Neutralizing Antibodies. *Cell*. 2020;182(3):744-53.e4. doi:  
839 <https://doi.org/10.1016/j.cell.2020.06.011>.
- 840 18. Israelow B, Song E, Mao T, Lu P, Meir A, Liu F, et al. Mouse model of SARS-CoV-2 reveals  
841 inflammatory role of type I interferon signaling. *The Journal of experimental medicine*. 2020;217(12).  
842 doi: 10.1084/jem.20201241.
- 843 19. Leist SR, Dinnon KH, 3rd, Schäfer A, Tse LV, Okuda K, Hou YJ, et al. A Mouse-Adapted SARS-CoV-2  
844 Induces Acute Lung Injury and Mortality in Standard Laboratory Mice. *Cell*. 2020. doi:  
845 10.1016/j.cell.2020.09.050.
- 846 20. Dinnon KH, Leist SR, Schäfer A, Edwards CE, Martinez DR, Montgomery SA, et al. A mouse-  
847 adapted model of SARS-CoV-2 to test COVID-19 countermeasures. *Nature*. 2020;586(7830):560-6. doi:  
848 10.1038/s41586-020-2708-8.
- 849 21. Gu H, Chen Q, Yang G, He L, Fan H, Deng Y-Q, et al. Adaptation of SARS-CoV-2 in BALB/c mice for  
850 testing vaccine efficacy. *Science (New York, NY)*. 2020;369(6511):1603-7. doi: 10.1126/science.abc4730.
- 851 22. Copreni E, Palmieri L, Castellani S, Conese M. A VSV-G Pseudotyped Last Generation Lentiviral  
852 Vector Mediates High Level and Persistent Gene Transfer in Models of Airway Epithelium In Vitro and In  
853 Vivo. *Viruses*. 2010;2(8):1577-88. doi: 10.3390/v2081577.
- 854 23. Limberis MP, Bell CL, Heath J, Wilson JM. Activation of transgene-specific T cells following  
855 lentivirus-mediated gene delivery to mouse lung. *Mol Ther*. 2010;18(1):143-50. doi:  
856 10.1038/mt.2009.190.
- 857 24. Wilson JM. Adeno-associated virus and lentivirus pseudotypes for lung-directed gene therapy.  
858 *Proceedings of the American Thoracic Society*. 2004;1(4):309-14. doi: 10.1513/pats.200409-041MS.



- 859 25. Kremer KL, Dunning KR, Parsons DW, Anson DS. Gene delivery to airway epithelial cells in vivo: a  
860 direct comparison of apical and basolateral transduction strategies using pseudotyped lentivirus vectors.  
861 *The journal of gene medicine*. 2007;9(5):362-8. doi: 10.1002/jgm.1025.
- 862 26. Buckley SMK, Howe SJ, Sheard V, Ward NJ, Coutelle C, Thrasher AJ, et al. Lentiviral transduction  
863 of the murine lung provides efficient pseudotype and developmental stage-dependent cell-specific  
864 transgene expression. *Gene Therapy*. 2008;15(16):1167-75. doi: 10.1038/gt.2008.74.
- 865 27. Copreni E, Penzo M, Carrabino S, Conese M. Lentivirus-mediated gene transfer to the respiratory  
866 epithelium: a promising approach to gene therapy of cystic fibrosis. *Gene Therapy*. 2004;11(1):S67-S75.  
867 doi: 10.1038/sj.gt.3302372.
- 868 28. Alton EFW, Beekman JM, Boyd AC, Brand J, Carlon MS, Connolly MM, et al. Preparation for a  
869 first-in-man lentivirus trial in patients with cystic fibrosis. *Thorax*. 2017;72(2):137. doi:  
870 10.1136/thoraxjnl-2016-208406.
- 871 29. Alton EW, Beekman JM, Boyd AC, Brand J, Carlon MS, Connolly MM, et al. Preparation for a first-  
872 in-man lentivirus trial in patients with cystic fibrosis. *Thorax*. 2017;72(2):137-47. doi: 10.1136/thoraxjnl-  
873 2016-208406.
- 874 30. Crawford KHD, Eguia R, Dingens AS, Loes AN, Malone KD, Wolf CR, et al. Protocol and Reagents  
875 for Pseudotyping Lentiviral Particles with SARS-CoV-2 Spike Protein for Neutralization Assays. *Viruses*.  
876 2020;12(5). doi: 10.3390/v12050513.
- 877 31. Chan KK, Dorosky D, Sharma P, Abbasi SA, Dye JM, Kranz DM, et al. Engineering human ACE2 to  
878 optimize binding to the spike protein of SARS coronavirus 2. *Science (New York, NY)*.  
879 2020;369(6508):1261-5. doi: 10.1126/science.abc0870.
- 880 32. Mehdipour AR, Hummer G. Dual nature of human ACE2 glycosylation in binding to SARS-CoV-2  
881 spike. *bioRxiv*. 2020:2020.07.09.193680. doi: 10.1101/2020.07.09.193680.
- 882 33. Wang Q, Zhang Y, Wu L, Niu S, Song C, Zhang Z, et al. Structural and Functional Basis of SARS-  
883 CoV-2 Entry by Using Human ACE2. *Cell*. 2020;181(4):894-904.e9. doi:  
884 <https://doi.org/10.1016/j.cell.2020.03.045>.
- 885 34. Rodrigues JPGLM, Barrera-Vilarmau S, M. C. Teixeira J, Sorokina M, Seckel E, Kastiris PL, et al.  
886 Insights on cross-species transmission of SARS-CoV-2 from structural modeling. *PLOS Computational*  
887 *Biology*. 2020;16(12):e1008449. doi: 10.1371/journal.pcbi.1008449.
- 888 35. Griffin BD, Chan M, Taylor N, Mendoza EJ, Leung A, Warner BM, et al. North American deer mice  
889 are susceptible to SARS-CoV-2. *bioRxiv*. 2020:2020.07.25.221291. doi: 10.1101/2020.07.25.221291.
- 890 36. Alexander MR, Schoeder CT, Brown JA, Smart CD, Moth C, Wikswo JP, et al. Predicting  
891 susceptibility to SARS-CoV-2 infection based on structural differences in ACE2 across species. *The FASEB*  
892 *Journal*. 2020;34(12):15946-60. doi: <https://doi.org/10.1096/fj.202001808R>.
- 893 37. Damas J, Hughes GM, Keough KC, Painter CA, Persky NS, Corbo M, et al. Broad host range of  
894 SARS-CoV-2 predicted by comparative and structural analysis of ACE2 in vertebrates. *Proceedings of the*  
895 *National Academy of Sciences*. 2020;117(36):22311-22. doi: 10.1073/pnas.2010146117.
- 896 38. Plante JA, Mitchell BM, Plante KS, Debbink K, Weaver SC, Menachery VD. The Variant Gambit:  
897 COVID's Next Move. *Cell host & microbe*. doi: 10.1016/j.chom.2021.02.020.
- 898 39. Starr TN, Greaney AJ, Addetia A, Hannon WW, Choudhary MC, Dingens AS, et al. Prospective  
899 mapping of viral mutations that escape antibodies used to treat COVID-19. *Science (New York, NY)*.  
900 2021;371(6531):850-4. doi: 10.1126/science.abf9302.
- 901 40. Greaney AJ, Starr TN, Gilchuk P, Zost SJ, Binshtein E, Loes AN, et al. Complete Mapping of  
902 Mutations to the SARS-CoV-2 Spike Receptor-Binding Domain that Escape Antibody Recognition. *Cell*  
903 *host & microbe*. 2021;29(1):44-57.e9. doi: 10.1016/j.chom.2020.11.007.
- 904 41. Sun S, Gu H, Cao L, Chen Q, Yang G, Li R-T, et al. Characterization and structural basis of a lethal  
905 mouse-adapted SARS-CoV-2. *bioRxiv*. 2020:2020.11.10.377333. doi: 10.1101/2020.11.10.377333.

- 906 42. Limberis M, Anson DS, Fuller M, Parsons DW. Recovery of airway cystic fibrosis transmembrane  
907 conductance regulator function in mice with cystic fibrosis after single-dose lentivirus-mediated gene  
908 transfer. *Human gene therapy*. 2002;13(16):1961-70. doi: 10.1089/10430340260355365.
- 909 43. Sun J, Zhuang Z, Zheng J, Li K, Wong RL-Y, Liu D, et al. Generation of a Broadly Useful Model for  
910 COVID-19 Pathogenesis, Vaccination, and Treatment. *Cell*. 2020;182(3):734-43.e5. doi:  
911 <https://doi.org/10.1016/j.cell.2020.06.010>.
- 912 44. Jefferson T, Spencer E, Brassey J, Heneghan C. Viral cultures for COVID-19 infectivity assessment.  
913 Systematic review. medRxiv. 2020:2020.08.04.20167932. doi: 10.1101/2020.08.04.20167932.
- 914 45. Weiskopf D, Schmitz KS, Raadsen MP, Grifoni A, Okba NMA, Endeman H, et al. Phenotype and  
915 kinetics of SARS-CoV-2-specific T cells in COVID-19 patients with acute respiratory distress syndrome.  
916 *Science Immunology*. 2020;5(48):eabd2071. doi: 10.1126/sciimmunol.abd2071.
- 917 46. Channappanavar R, Fehr Anthony R, Vijay R, Mack M, Zhao J, Meyerholz David K, et al.  
918 Dysregulated Type I Interferon and Inflammatory Monocyte-Macrophage Responses Cause Lethal  
919 Pneumonia in SARS-CoV-Infected Mice. *Cell host & microbe*. 2016;19(2):181-93. doi:  
920 <https://doi.org/10.1016/j.chom.2016.01.007>.
- 921 47. Pence BD. Severe COVID-19 and aging: are monocytes the key? *Geroscience*. 2020;42(4):1051-  
922 61. doi: 10.1007/s11357-020-00213-0.
- 923 48. Banerjee AK, Blanco MR, Bruce EA, Honson DD, Chen LM, Chow A, et al. SARS-CoV-2 Disrupts  
924 Splicing, Translation, and Protein Trafficking to Suppress Host Defenses. *Cell*. 2020;183(5):1325-39.e21.  
925 doi: <https://doi.org/10.1016/j.cell.2020.10.004>.
- 926 49. Schubert K, Karousis ED, Jomaa A, Scaiola A, Echeverria B, Gurzeler L-A, et al. SARS-CoV-2 Nsp1  
927 binds the ribosomal mRNA channel to inhibit translation. *Nature Structural & Molecular Biology*.  
928 2020;27(10):959-66. doi: 10.1038/s41594-020-0511-8.
- 929 50. Miller B, Silverstein A, Flores M, Cao K, Kumagai H, Mehta HH, et al. Host mitochondrial  
930 transcriptome response to SARS-CoV-2 in multiple cell models and clinical samples. *Scientific Reports*.  
931 2021;11(1):3. doi: 10.1038/s41598-020-79552-z.
- 932 51. Blanco-Melo D, Nilsson-Payant BE, Liu WC, Uhl S, Hoagland D, Møller R, et al. Imbalanced Host  
933 Response to SARS-CoV-2 Drives Development of COVID-19. *Cell*. 2020;181(5):1036-45.e9. doi:  
934 [10.1016/j.cell.2020.04.026](https://doi.org/10.1016/j.cell.2020.04.026).
- 935 52. Wu M, Chen Y, Xia H, Wang C, Tan CY, Cai X, et al. Transcriptional and proteomic insights into the  
936 host response in fatal COVID-19 cases. *Proceedings of the National Academy of Sciences*.  
937 2020;117(45):28336. doi: 10.1073/pnas.2018030117.
- 938 53. Vaz de Paula CB, de Azevedo MLV, Nagashima S, Martins APC, Malaquias MAS, Miggiolaro  
939 AFRdS, et al. IL-4/IL-13 remodeling pathway of COVID-19 lung injury. *Scientific Reports*.  
940 2020;10(1):18689. doi: 10.1038/s41598-020-75659-5.
- 941 54. Lavoie H, Gagnon J, Therrien M. ERK signalling: a master regulator of cell behaviour, life and fate.  
942 *Nature Reviews Molecular Cell Biology*. 2020;21(10):607-32. doi: 10.1038/s41580-020-0255-7.
- 943 55. Sountoulidis A, Stavropoulos A, Giaglis S, Apostolou E, Monteiro R, Chuva de Sousa Lopes SM, et  
944 al. Activation of the Canonical Bone Morphogenetic Protein (BMP) Pathway during Lung Morphogenesis  
945 and Adult Lung Tissue Repair. *PLOS ONE*. 2012;7(8):e41460. doi: 10.1371/journal.pone.0041460.
- 946 56. Zhu Y, Wang W, Wang X. Roles of transcriptional factor 7 in production of inflammatory factors  
947 for lung diseases. *J Transl Med*. 2015;13:273-. doi: 10.1186/s12967-015-0617-7.
- 948 57. Lin L, Han Q, Xiong Y, Li T, Liu Z, Xu H, et al. Krüppel-like-factor 4 Attenuates Lung Fibrosis via  
949 Inhibiting Epithelial-mesenchymal Transition. *Scientific reports*. 2017;7(1):15847-. doi: 10.1038/s41598-  
950 017-14602-7.
- 951 58. Raslan AA, Yoon JK. WNT Signaling in Lung Repair and Regeneration. *Mol Cells*. 2020;43(9):774-  
952 83. doi: 10.14348/molcells.2020.0059.

- 953 59. Wang H, Kadlec TA, Au-Yeung BB, Goodfellow HES, Hsu L-Y, Freedman TS, et al. ZAP-70: an  
954 essential kinase in T-cell signaling. *Cold Spring Harb Perspect Biol.* 2010;2(5):a002279-a. doi:  
955 10.1101/cshperspect.a002279.
- 956 60. Nechanitzky R, Akbas D, Scherer S, Györy I, Hoyle T, Ramamoorthy S, et al. Transcription factor  
957 EBF1 is essential for the maintenance of B cell identity and prevention of alternative fates in committed  
958 cells. *Nature immunology.* 2013;14(8):867-75. doi: 10.1038/ni.2641.
- 959 61. Duperray C, Boiron JM, Boucheix C, Cantaloube JF, Lavabre-Bertrand T, Attal M, et al. The CD24  
960 antigen discriminates between pre-B and B cells in human bone marrow. *J Immunol.* 1990;145(11):3678-  
961 83. doi:
- 962 62. Curtin N, Bányai K, Thaventhiran J, Le Quesne J, Helyes Z, Bai P. Repositioning PARP inhibitors for  
963 SARS-CoV-2 infection(COVID-19); a new multi-pronged therapy for acute respiratory distress syndrome?  
964 *British Journal of Pharmacology.* 2020;177(16):3635-45. doi: <https://doi.org/10.1111/bph.15137>.
- 965 63. Badawy AAB. Immunotherapy of COVID-19 with poly (ADP-ribose) polymerase inhibitors:  
966 starting with nicotinamide. *Biosci Rep.* 2020;40(10):BSR20202856. doi: 10.1042/BSR20202856.
- 967 64. Pinna G. Sex and COVID-19: A Protective Role for Reproductive Steroids. *Trends in endocrinology  
968 and metabolism: TEM.* 2021;32(1):3-6. doi: 10.1016/j.tem.2020.11.004.
- 969 65. Peckham H, de Grujter NM, Raine C, Radziszewska A, Ciurtin C, Wedderburn LR, et al. Male sex  
970 identified by global COVID-19 meta-analysis as a risk factor for death and ICU admission. *Nature  
971 Communications.* 2020;11(1):6317. doi: 10.1038/s41467-020-19741-6.
- 972 66. Jin J-M, Bai P, He W, Wu F, Liu X-F, Han D-M, et al. Gender Differences in Patients With COVID-  
973 19: Focus on Severity and Mortality. *Frontiers in Public Health.* 2020;8(152). doi:  
974 10.3389/fpubh.2020.00152.
- 975 67. Channappanavar R, Fett C, Mack M, Ten Eyck PP, Meyerholz DK, Perlman S. Sex-Based  
976 Differences in Susceptibility to Severe Acute Respiratory Syndrome Coronavirus Infection. *J Immunol.*  
977 2017;198(10):4046-53. doi: 10.4049/jimmunol.1601896.
- 978 68. Nicks KM, Fowler TW, Akel NS, Perrien DS, Suva LJ, Gaddy D. Bone turnover across the  
979 menopause transition : The role of gonadal inhibins. *Ann N Y Acad Sci.* 2010;1192:153-60. doi:  
980 10.1111/j.1749-6632.2009.05349.x.
- 981 69. Frieman MB, Chen J, Morrison TE, Whitmore A, Funkhouser W, Ward JM, et al. SARS-CoV  
982 Pathogenesis Is Regulated by a STAT1 Dependent but a Type I, II and III Interferon Receptor Independent  
983 Mechanism. *PLOS Pathogens.* 2010;6(4):e1000849. doi: 10.1371/journal.ppat.1000849.
- 984 70. Lazear HM, Schoggins JW, Diamond MS. Shared and Distinct Functions of Type I and Type III  
985 Interferons. *Immunity.* 2019;50(4):907-23. doi: 10.1016/j.immuni.2019.03.025.
- 986 71. Galani IE, Triantafyllia V, Eleminiadou EE, Koltsida O, Stavropoulos A, Manioudaki M, et al.  
987 Interferon-λ Mediates Non-redundant Front-Line Antiviral Protection against Influenza Virus Infection  
988 without Compromising Host Fitness. *Immunity.* 2017;46(5):875-90.e6. doi:  
989 10.1016/j.immuni.2017.04.025.
- 990 72. Vanderheiden A, Ralfs P, Chirkova T, Upadhyay AA, Zimmerman MG, Bedoya S, et al. Type I and  
991 Type III Interferons Restrict SARS-CoV-2 Infection of Human Airway Epithelial Cultures. *Journal of  
992 virology.* 2020;94(19):e00985-20. doi: 10.1128/JVI.00985-20.
- 993 73. Boudewijns R, Thibaut HJ, Kaptein SJF, Li R, Vergote V, Seldeslachts L, et al. STAT2 signaling  
994 restricts viral dissemination but drives severe pneumonia in SARS-CoV-2 infected hamsters. *Nature  
995 Communications.* 2020;11(1):5838. doi: 10.1038/s41467-020-19684-y.
- 996 74. Takasuka N, Fujii H, Takahashi Y, Kasai M, Morikawa S, Itamura S, et al. A subcutaneously  
997 injected UV-inactivated SARS coronavirus vaccine elicits systemic humoral immunity in mice.  
998 *International immunology.* 2004;16(10):1423-30. doi: 10.1093/intimm/dxh143.

- 999 75. Wajnberg A, Amanat F, Firpo A, Altman DR, Bailey MJ, Mansour M, et al. Robust neutralizing  
1000 antibodies to SARS-CoV-2 infection persist for months. *Science* (New York, NY). 2020;370(6521):1227.  
1001 doi: 10.1126/science.abd7728.
- 1002 76. Li S, Roupheal N, Duraisingham S, Romero-Steiner S, Presnell S, Davis C, et al. Molecular  
1003 signatures of antibody responses derived from a systems biology study of five human vaccines. *Nature*  
1004 *immunology*. 2014;15(2):195-204. doi: 10.1038/ni.2789.
- 1005 77. Tan AT, Linster M, Tan CW, Le Bert N, Chia WN, Kunasegaran K, et al. Early induction of  
1006 functional SARS-CoV-2-specific T cells associates with rapid viral clearance and mild disease in COVID-19  
1007 patients. *Cell Reports*. 2021;34(6):108728. doi: <https://doi.org/10.1016/j.celrep.2021.108728>.
- 1008 78. Kumari P, Rothan HA, Natekar JP, Stone S, Pathak H, Strate PG, et al. Neuroinvasion and  
1009 encephalitis following intranasal inoculation of SARS-CoV-2 in K18-hACE2 mice. *bioRxiv*.  
1010 2020:2020.12.14.422714. doi: 10.1101/2020.12.14.422714.
- 1011 79. Carossino M, Montanaro P, O'Connell A, Kenney D, Gertje H, Grosz KA, et al. Fatal neuroinvasion  
1012 of SARS-CoV-2 in K18-hACE2 mice is partially dependent on hACE2 expression. *bioRxiv*. 2021. doi:  
1013 10.1101/2021.01.13.425144.
- 1014 80. Huang C, Wang Y, Li X, Ren L, Zhao J, Hu Y, et al. Clinical features of patients infected with 2019  
1015 novel coronavirus in Wuhan, China. *Lancet* (London, England). 2020;395(10223):497-506. doi:  
1016 10.1016/s0140-6736(20)30183-5.
- 1017 81. Han H, Ma Q, Li C, Liu R, Zhao L, Wang W, et al. Profiling serum cytokines in COVID-19 patients  
1018 reveals IL-6 and IL-10 are disease severity predictors. *Emerging microbes & infections*. 2020;9(1):1123-  
1019 30. doi: 10.1080/22221751.2020.1770129.
- 1020 82. Herold T, Jurinovic V, Arnreich C, Lipworth BJ, Hellmuth JC, von Bergwelt-Baildon M, et al.  
1021 Elevated levels of IL-6 and CRP predict the need for mechanical ventilation in COVID-19. *Journal of*  
1022 *Allergy and Clinical Immunology*. 2020;146(1):128-36.e4. doi: <https://doi.org/10.1016/j.jaci.2020.05.008>.
- 1023 83. Xia H, Cao Z, Xie X, Zhang X, Chen JY-C, Wang H, et al. Evasion of Type I Interferon by SARS-CoV-  
1024 2. *Cell Reports*. 2020;33(1):108234. doi: <https://doi.org/10.1016/j.celrep.2020.108234>.
- 1025 84. Masiá M, Fernández-González M, Padilla S, Ortega P, García JA, Agulló V, et al. Impact of  
1026 interleukin-6 blockade with tocilizumab on SARS-CoV-2 viral kinetics and antibody responses in patients  
1027 with COVID-19: A prospective cohort study. *EBioMedicine*. 2020;60. doi: 10.1016/j.ebiom.2020.102999.
- 1028 85. Lu L, Zhang H, Dauphars DJ, He Y-W. A Potential Role of Interleukin 10 in COVID-19 Pathogenesis.  
1029 *Trends in Immunology*. 2021;42(1):3-5. doi: <https://doi.org/10.1016/j.it.2020.10.012>.
- 1030 86. Gadotti AC, de Castro Deus M, Telles JP, Wind R, Goes M, Garcia Charello Ossoski R, et al. IFN- $\gamma$  is  
1031 an independent risk factor associated with mortality in patients with moderate and severe COVID-19  
1032 infection. *Virus Res*. 2020;289:198171-. doi: 10.1016/j.virusres.2020.198171.
- 1033 87. Mahlaköiv T, Ritz D, Mordstein M, DeDiego ML, Enjuanes L, Müller MA, et al. Combined action of  
1034 type I and type III interferon restricts initial replication of severe acute respiratory syndrome coronavirus  
1035 in the lung but fails to inhibit systemic virus spread. *The Journal of general virology*. 2012;93(Pt  
1036 12):2601-5. doi: 10.1099/vir.0.046284-0.
- 1037 88. Felgenhauer U, Schoen A, Gad HH, Hartmann R, Schaubmar AR, Failing K, et al. Inhibition of  
1038 SARS-CoV-2 by type I and type III interferons. *J Biol Chem*. 2020;295(41):13958-64. doi:  
1039 10.1074/jbc.AC120.013788.
- 1040 89. Nguyen TH, McAuley JL, Kim Y, Zheng MZ, Gherardin NA, Godfrey DI, et al. Influenza, but not  
1041 SARS-CoV-2, infection induces a rapid interferon response that wanes with age and diminished tissue-  
1042 resident memory CD8(+) T cells. *Clin Transl Immunology*. 2021;10(1):e1242-e. doi: 10.1002/cti2.1242.
- 1043 90. Jiang H-w, Zhang H-n, Meng Q-f, Xie J, Li Y, Chen H, et al. SARS-CoV-2 Orf9b suppresses type I  
1044 interferon responses by targeting TOM70. *Cellular & Molecular Immunology*. 2020;17(9):998-1000. doi:  
1045 10.1038/s41423-020-0514-8.

- 1046 91. Miorin L, Kehrer T, Sanchez-Aparicio MT, Zhang K, Cohen P, Patel RS, et al. SARS-CoV-2 Orf6  
1047 hijacks Nup98 to block STAT nuclear import and antagonize interferon signaling. *Proceedings of the*  
1048 *National Academy of Sciences*. 2020;117(45):28344. doi: 10.1073/pnas.2016650117.
- 1049 92. Hall JC, Rosen A. Type I interferons: crucial participants in disease amplification in autoimmunity.  
1050 *Nat Rev Rheumatol*. 2010;6(1):40-9. doi: 10.1038/nrrheum.2009.237.
- 1051 93. Monk PD, Marsden RJ, Tear VJ, Brookes J, Batten TN, Mankowski M, et al. Safety and efficacy of  
1052 inhaled nebulised interferon beta-1a (SNG001) for treatment of SARS-CoV-2 infection: a randomised,  
1053 double-blind, placebo-controlled, phase 2 trial. *The Lancet Respiratory Medicine*. 2020. doi:  
1054 [https://doi.org/10.1016/S2213-2600\(20\)30511-7](https://doi.org/10.1016/S2213-2600(20)30511-7).
- 1055 94. Park A, Iwasaki A. Type I and Type III Interferons - Induction, Signaling, Evasion, and Application  
1056 to Combat COVID-19. *Cell host & microbe*. 2020;27(6):870-8. doi: 10.1016/j.chom.2020.05.008.
- 1057 95. Lan J, Ge J, Yu J, Shan S, Zhou H, Fan S, et al. Structure of the SARS-CoV-2 spike receptor-binding  
1058 domain bound to the ACE2 receptor. *Nature*. 2020;581(7807):215-20. doi: 10.1038/s41586-020-2180-5.
- 1059 96. Johnson BJ, Le TT, Dobbin CA, Banovic T, Howard CB, Flores Fde M, et al. Heat shock protein 10  
1060 inhibits lipopolysaccharide-induced inflammatory mediator production. *J Biol Chem*. 2005;280(6):4037-  
1061 47. doi: M411569200 [pii]  
1062 10.1074/jbc.M411569200.
- 1063 97. La Linn M, Bellett AJ, Parsons PG, Suhrbier A. Complete removal of mycoplasma from viral  
1064 preparations using solvent extraction. *J Virol Methods*. 1995;52(1-2):51-4. doi:  
1065 98. Chlibek R, Bayas JM, Collins H, de la Pinta MLR, Ledent E, Mols JF, et al. Safety and  
1066 Immunogenicity of an AS01-adjuvanted Varicella-zoster Virus Subunit Candidate Vaccine Against Herpes  
1067 Zoster in Adults ≥50 Years of Age. *The Journal of Infectious Diseases*. 2013;208(12):1953-61. doi:  
1068 10.1093/infdis/jit365.
- 1069 99. Yan K, Vet LJ, Tang B, Hobson-Peters J, Rawle DJ, Le TT, et al. A Yellow Fever Virus 17D Infection  
1070 and Disease Mouse Model Used to Evaluate a Chimeric Binjari-Yellow Fever Virus Vaccine. *Vaccines*.  
1071 2020;8(3). doi: 10.3390/vaccines8030368.
- 1072 100. Swann JB, Hayakawa Y, Zerafa N, Sheehan KC, Scott B, Schreiber RD, et al. Type I IFN contributes  
1073 to NK cell homeostasis, activation, and antitumor function. *J Immunol*. 2007;178(12):7540-9. doi:  
1074 10.4049/jimmunol.178.12.7540.
- 1075 101. Ank N, Iversen MB, Bartholdy C, Staeheli P, Hartmann R, Jensen UB, et al. An Important Role for  
1076 Type III Interferon (IFN-λ/IL-28) in TLR-Induced Antiviral Activity. *The Journal of Immunology*.  
1077 2008;180(4):2474-85. doi: 10.4049/jimmunol.180.4.2474.
- 1078 102. Souza-Fonseca-Guimaraes F, Young A, Mittal D, Martinet L, Bruedigam C, Takeda K, et al. NK cells  
1079 require IL-28R for optimal in vivo activity. *Proc Natl Acad Sci U S A*. 2015;112(18):E2376-84. doi:  
1080 10.1073/pnas.1424241112.
- 1081 103. Schroder WA, Le TTT, Major L, Street S, Gardner J, Lambley E, et al. A Physiological Function of  
1082 Inflammation-Associated SerpinB2 Is Regulation of Adaptive Immunity. *The Journal of Immunology*.  
1083 2010;184(5):2663. doi: 10.4049/jimmunol.0902187.
- 1084 104. Simons A. A quality control tool for high throughput sequence data. Available online:  
1085 <https://www.bioinformatics.babraham.ac.uk/projects/fastqc>. 2010. doi:  
1086 105. Martin M. Cutadapt removes adapter sequences from high-throughput sequencing reads. 2011.  
1087 2011;17(1):3. doi: 10.14806/ej.17.1.200.
- 1088 106. Dobin A, Davis CA, Schlesinger F, Drenkow J, Zaleski C, Jha S, et al. STAR: ultrafast universal RNA-  
1089 seq aligner. *Bioinformatics*. 2013;29(1):15-21. doi: 10.1093/bioinformatics/bts635.
- 1090 107. Harrow J, Frankish A, Gonzalez JM, Tapanari E, Diekhans M, Kokocinski F, et al. GENCODE: the  
1091 reference human genome annotation for The ENCODE Project. *Genome Res*. 2012;22(9):1760-74. doi:  
1092 10.1101/gr.135350.111.

1093 108. Li B, Dewey CN. RSEM: accurate transcript quantification from RNA-Seq data with or without a  
1094 reference genome. *BMC Bioinformatics*. 2011;12(1):323. doi: 10.1186/1471-2105-12-323.

1095 109. Li H, Handsaker B, Wysoker A, Fennell T, Ruan J, Homer N, et al. The Sequence Alignment/Map  
1096 format and SAMtools. *Bioinformatics*. 2009;25(16):2078-9. doi: 10.1093/bioinformatics/btp352.

1097 110. Shannon P, Markiel A, Ozier O, Baliga NS, Wang JT, Ramage D, et al. Cytoscape: a software  
1098 environment for integrated models of biomolecular interaction networks. *Genome Res*.  
1099 2003;13(11):2498-504. doi: 10.1101/gr.1239303.

1100 111. Szklarczyk D, Gable AL, Lyon D, Junge A, Wyder S, Huerta-Cepas J, et al. STRING v11: protein-  
1101 protein association networks with increased coverage, supporting functional discovery in genome-wide  
1102 experimental datasets. *Nucleic acids research*. 2019;47(D1):D607-D13. doi: 10.1093/nar/gky1131.

1103 112. Mi H, Muruganujan A, Ebert D, Huang X, Thomas PD. PANTHER version 14: more genomes, a  
1104 new PANTHER GO-slim and improvements in enrichment analysis tools. *Nucleic Acids Res*.  
1105 2019;47(D1):D419-d26. doi: 10.1093/nar/gky1038.

1106 113. Subramanian A, Tamayo P, Mootha VK, Mukherjee S, Ebert BL, Gillette MA, et al. Gene set  
1107 enrichment analysis: a knowledge-based approach for interpreting genome-wide expression profiles.  
1108 *Proc Natl Acad Sci U S A*. 2005;102(43):15545-50. doi: 10.1073/pnas.0506580102.

1109 114. Ashburner M, Ball CA, Blake JA, Botstein D, Butler H, Cherry JM, et al. Gene ontology: tool for the  
1110 unification of biology. The Gene Ontology Consortium. *Nature genetics*. 2000;25(1):25-9. doi:  
1111 10.1038/75556.

1112 115. Consortium GO. The Gene Ontology resource: enriching a GOld mine. *Nucleic Acids Res*.  
1113 2021;49(D1):D325-d34. doi: 10.1093/nar/gkaa1113.

1114 116. Chen EY, Tan CM, Kou Y, Duan Q, Wang Z, Meirelles GV, et al. Enrichr: interactive and  
1115 collaborative HTML5 gene list enrichment analysis tool. *BMC Bioinformatics*. 2013;14:128. doi:  
1116 10.1186/1471-2105-14-128.

1117 117. Kuleshov MV, Jones MR, Rouillard AD, Fernandez NF, Duan Q, Wang Z, et al. Enrichr: a  
1118 comprehensive gene set enrichment analysis web server 2016 update. *Nucleic Acids Res*.  
1119 2016;44(W1):W90-7. doi: 10.1093/nar/gkw377.

1120 118. Rusinova I, Forster S, Yu S, Kannan A, Masse M, Cumming H, et al. INTERFEROME v2.0: an  
1121 updated database of annotated interferon-regulated genes. *Nucleic Acids Research*. 2013;41(D1):D1040-  
1122 D6. doi: 10.1093/nar/gks1215.

1123

Figure 1

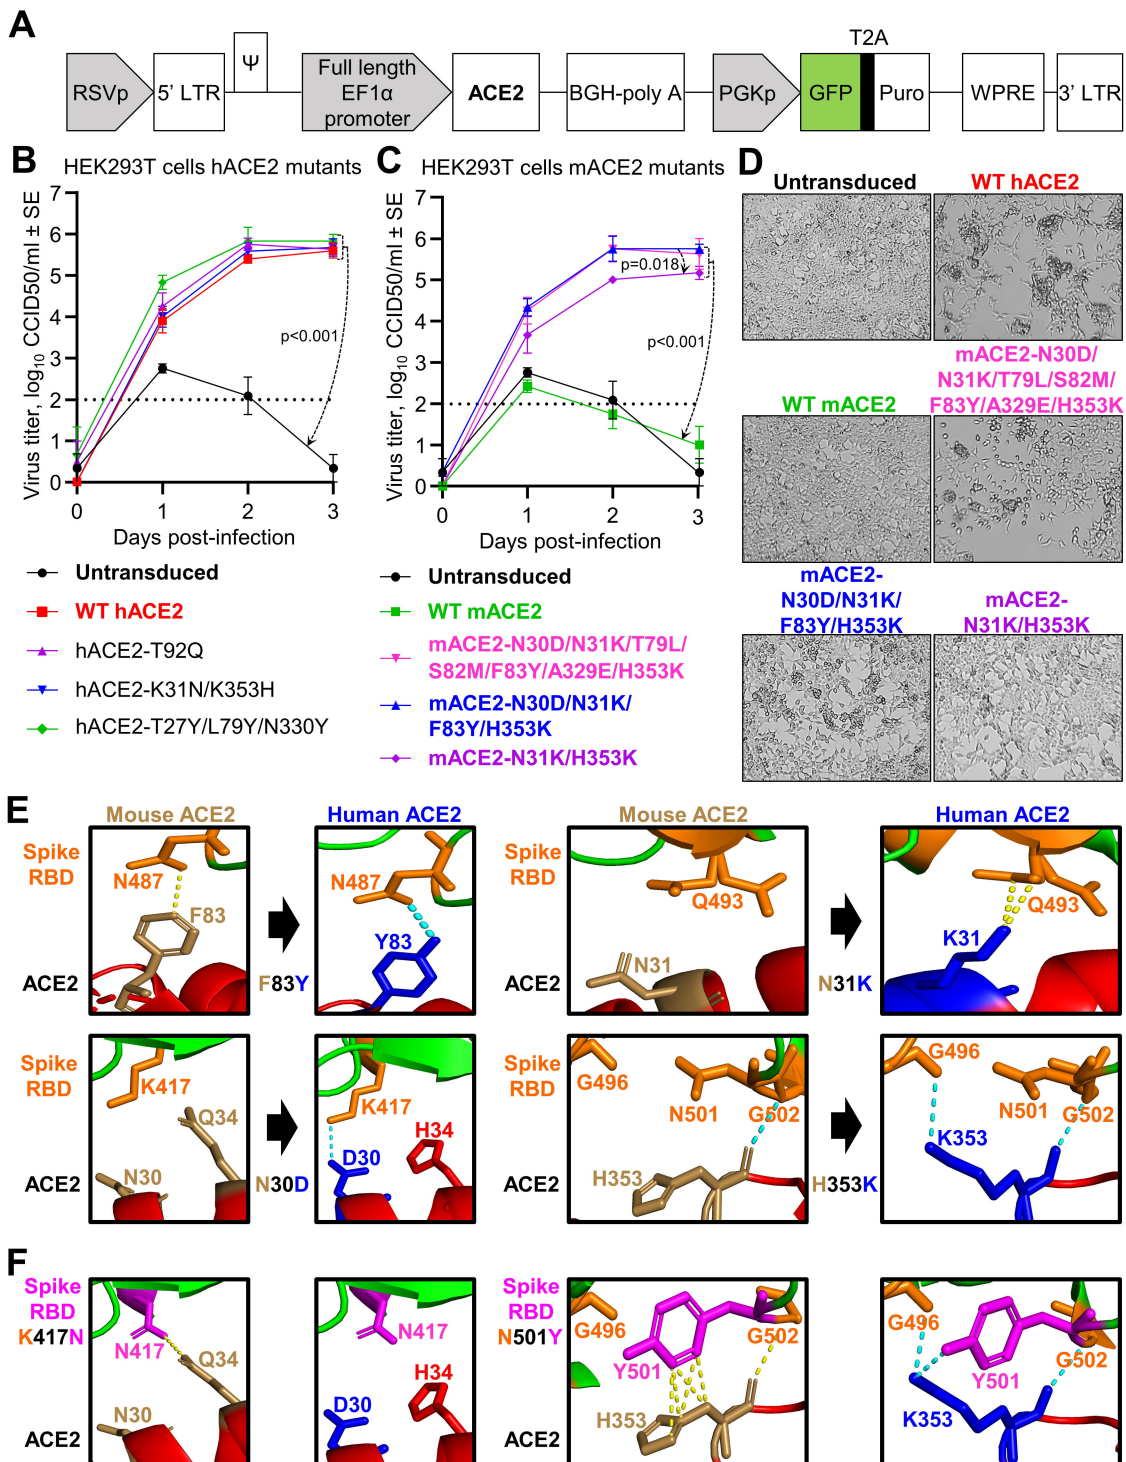

Figure 2

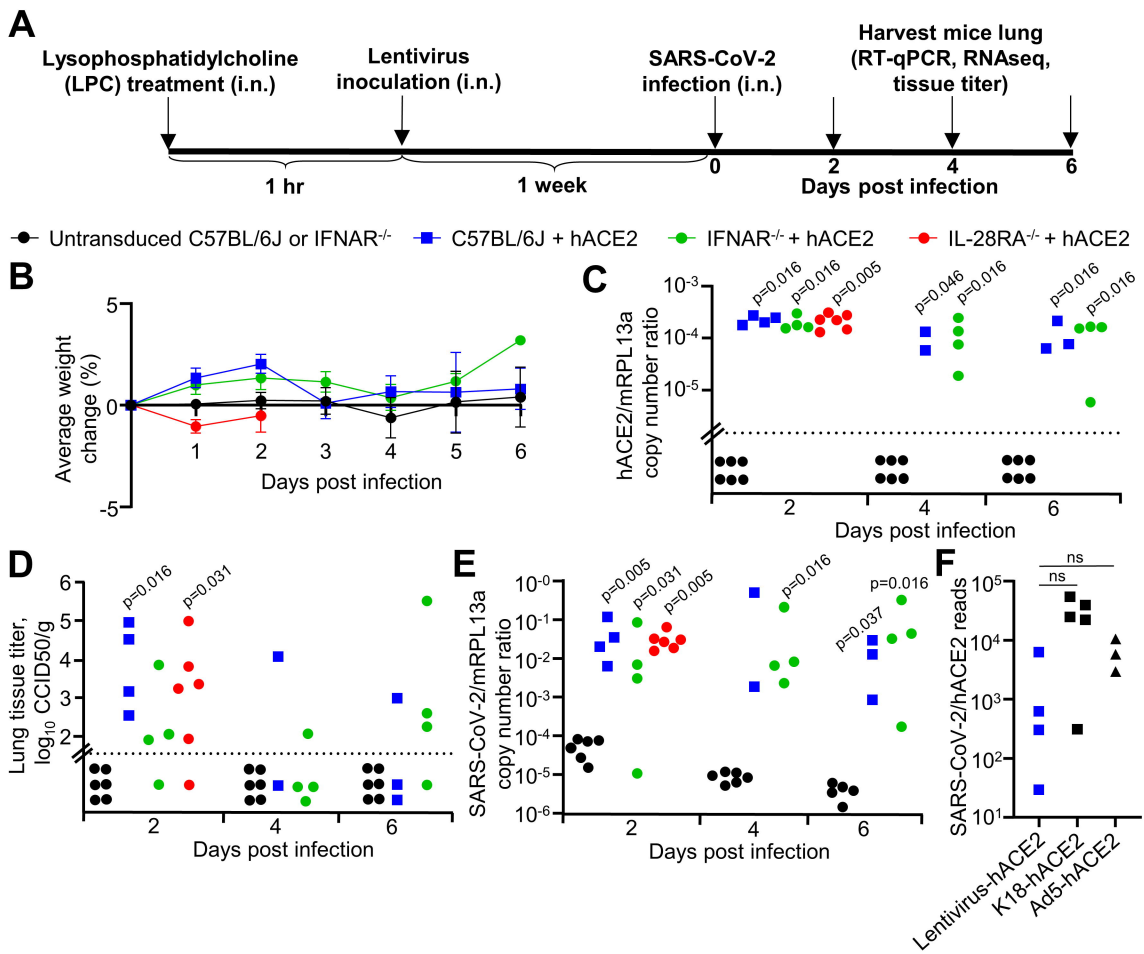



Figure 3

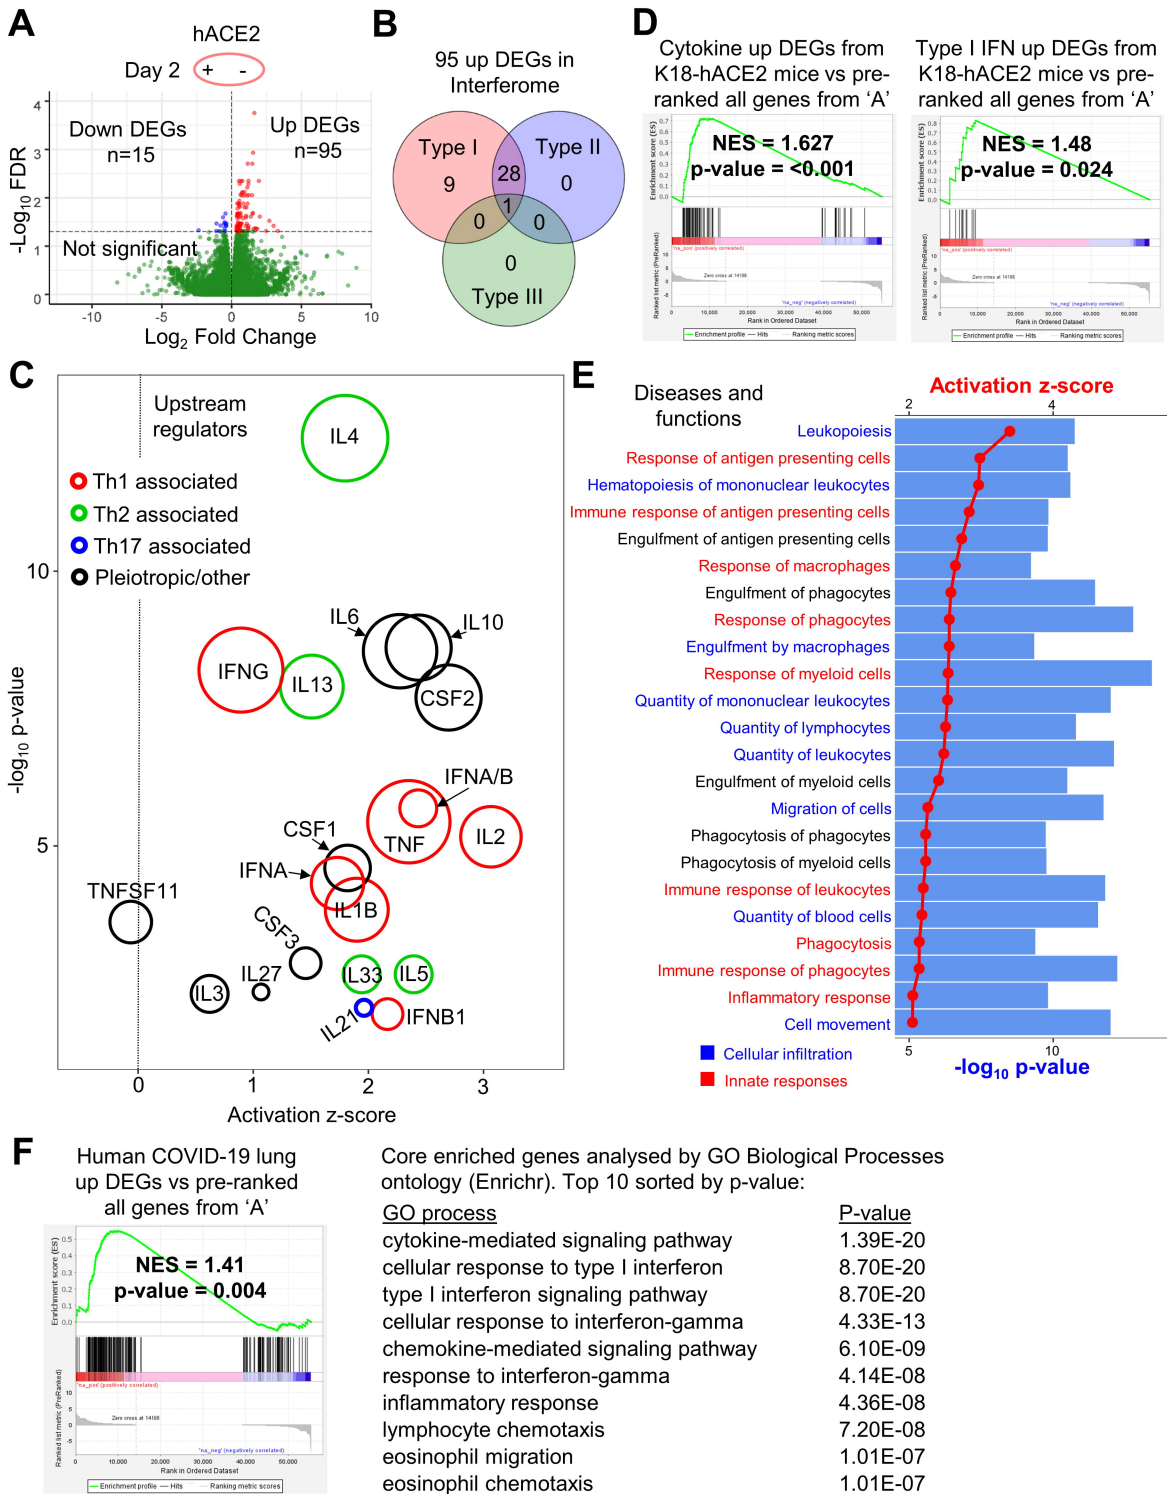

Figure 4

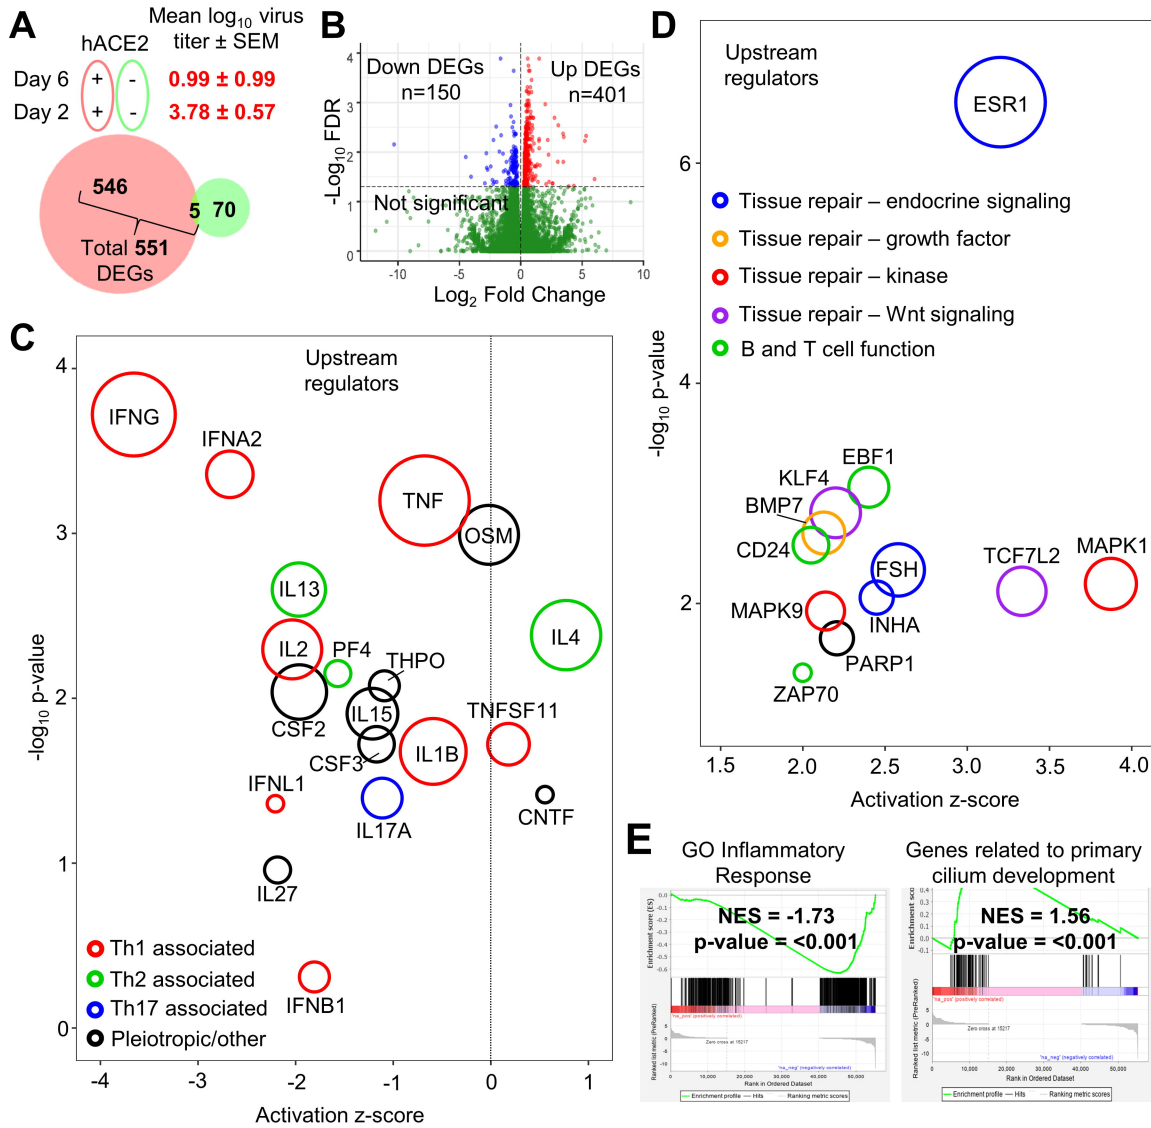

## Figure 5

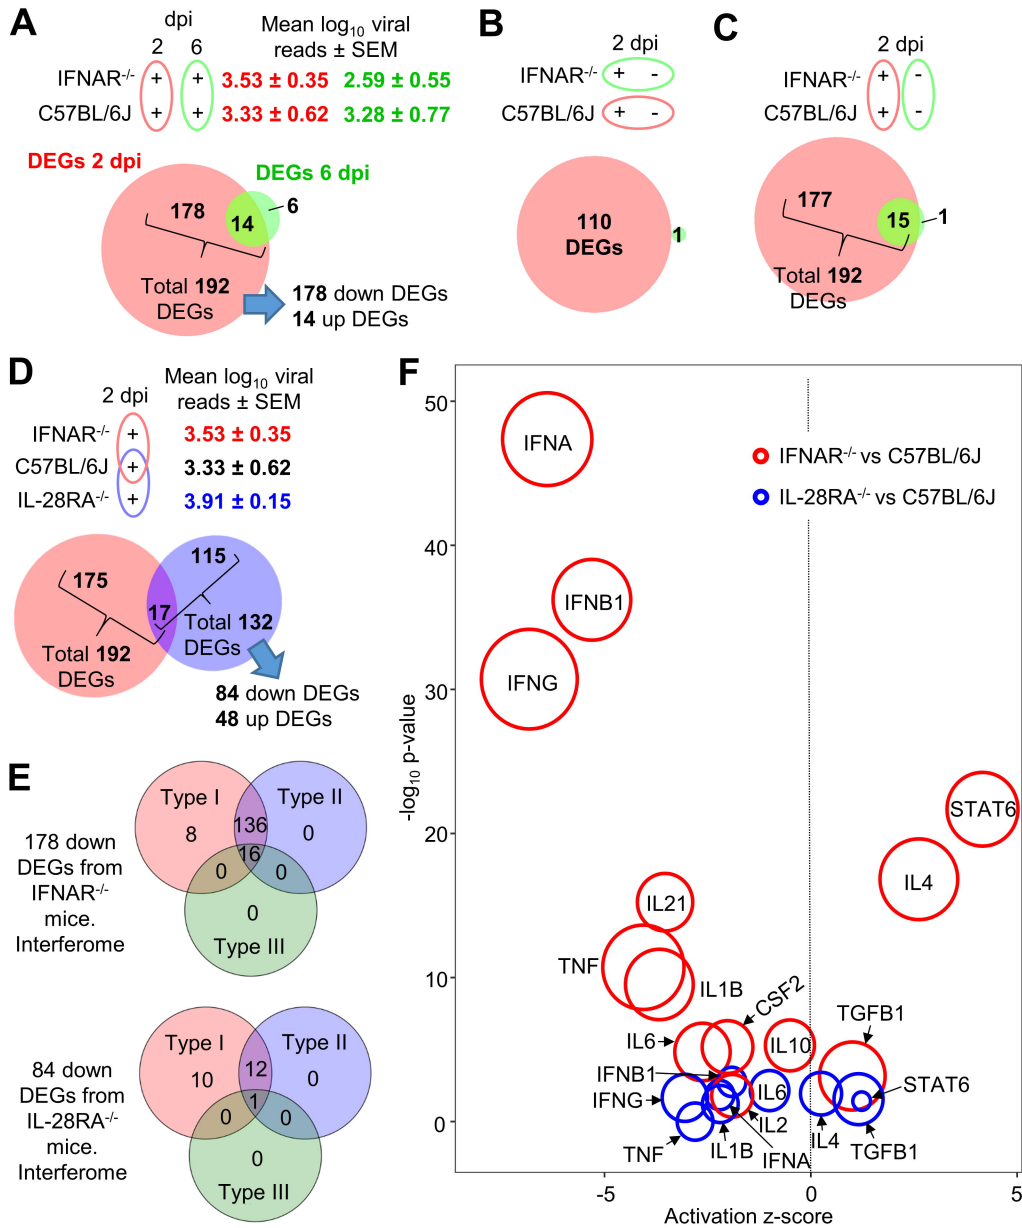

Figure 6

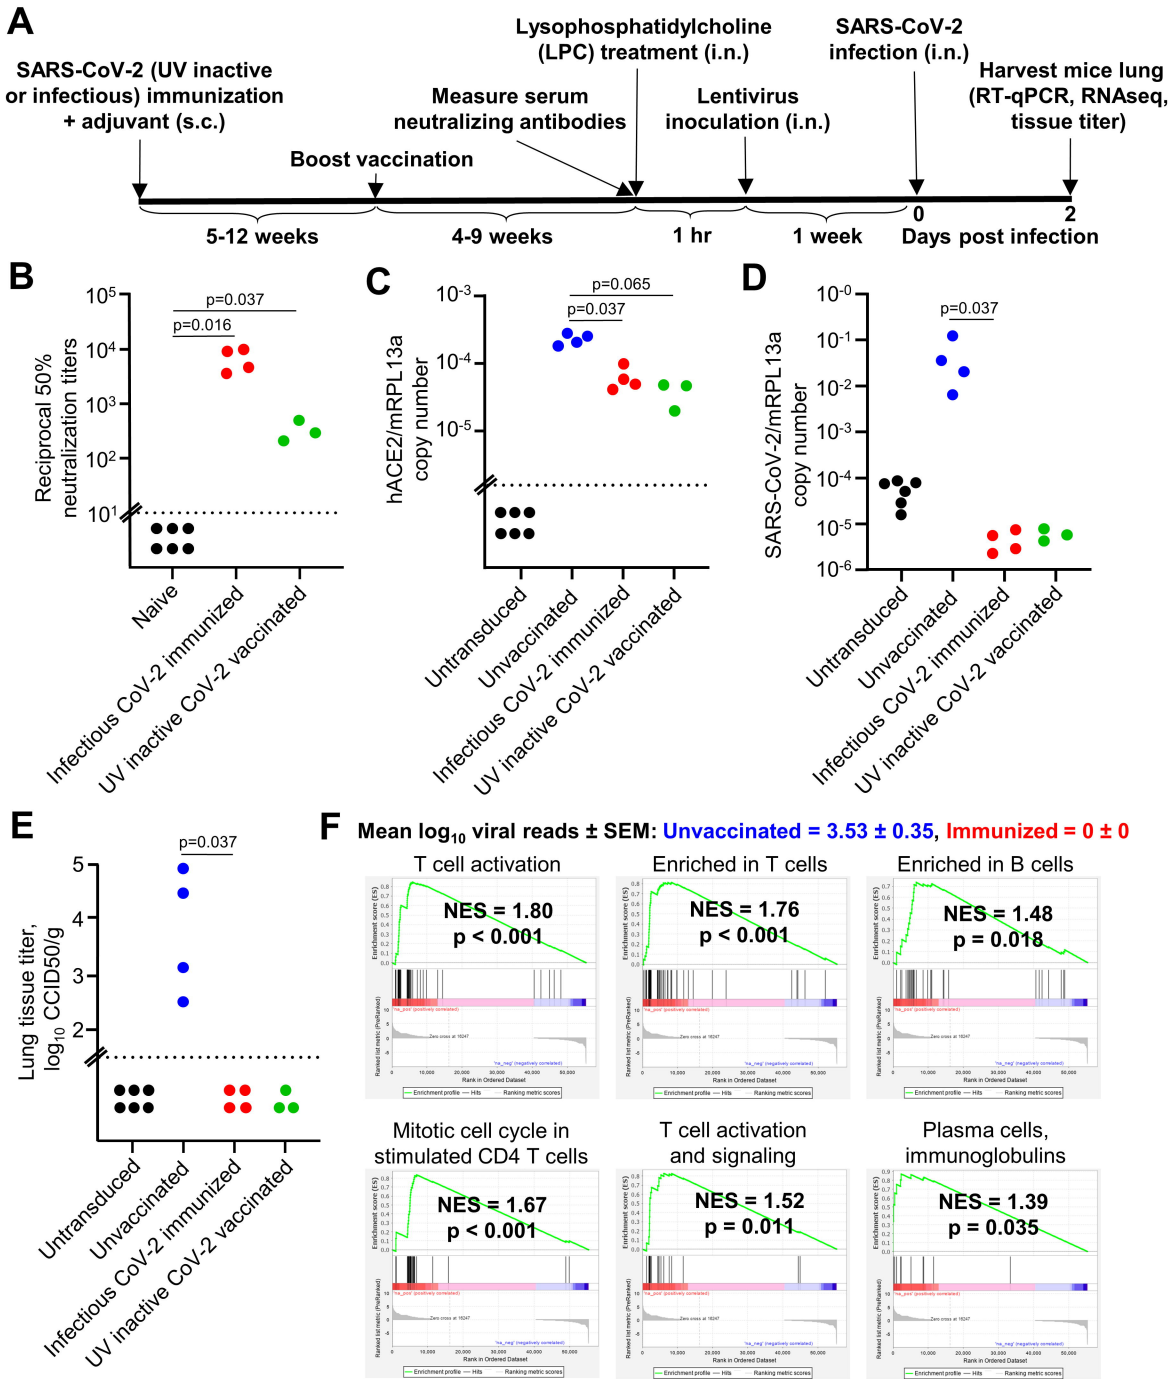

## Supplementary figure 1

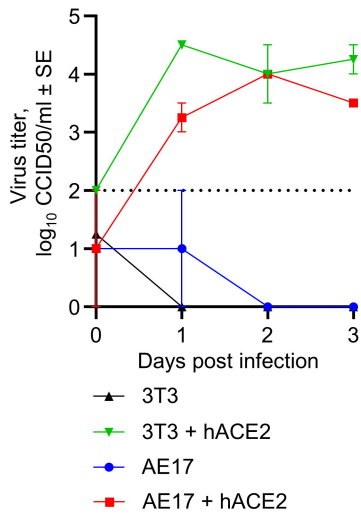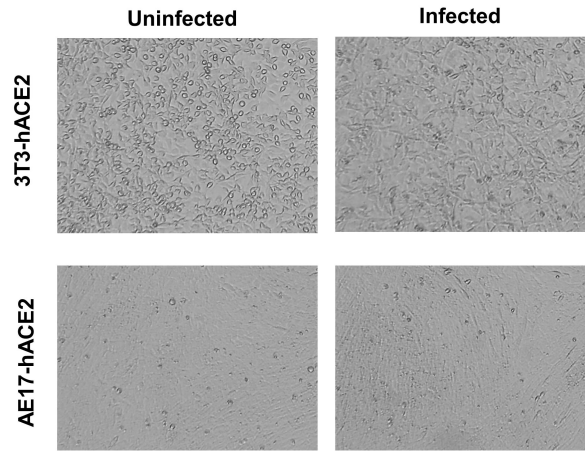

## Supplementary figure 2

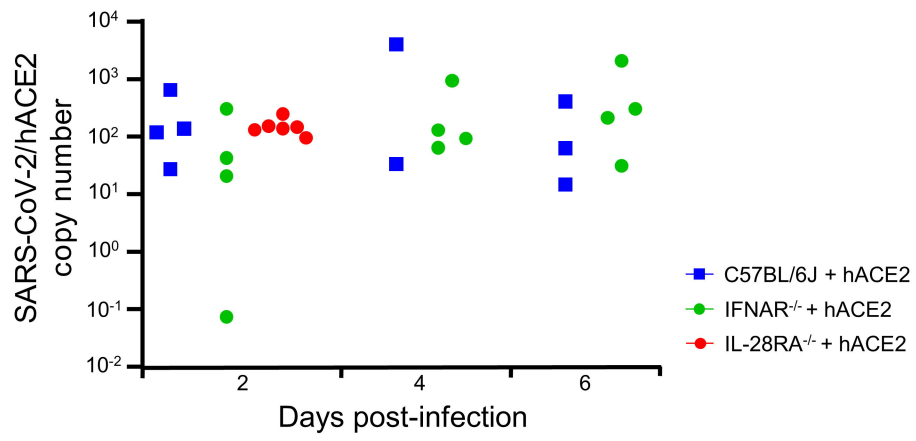

### Supplementary figure 3

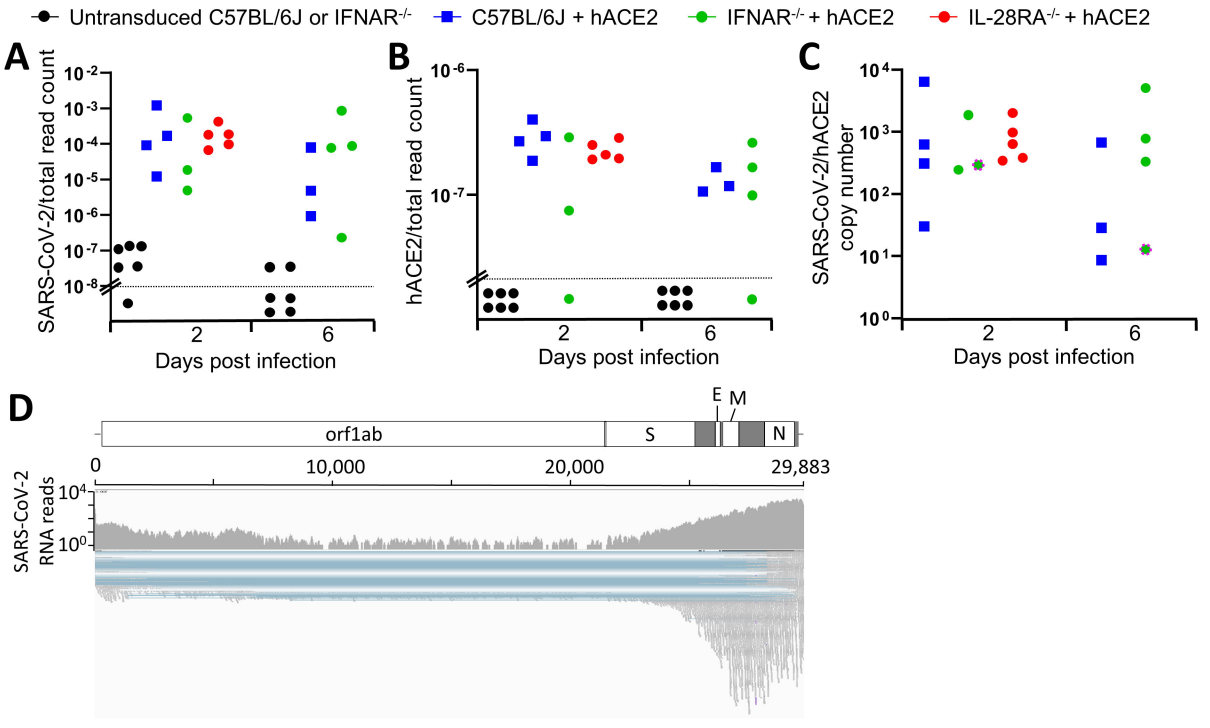

Source: https://www.biorxiv.org/content/biorxiv/early/2021/03/11/2021.02.09.430547.full.pdf
