# Supplementary material for: ACE2-lentiviral transduction enables mouse SARS-CoV-2 infection and mapping of receptor interactions
Source: bioRxiv preprint, doi:10.1101/2021.02.09.430547, version 3 (2021-03-11)
Supplement: Supplementary Table 4 [file 430547_file14.xlsx]

## Sheet: A) Setup
		Experimental setup
		C57BL/6J and IL-28RA-/- mice lung harvested at day 2 post-infection
		All mice have hACE2 transduced by lentivirus
		DEGs criteria q<0.05
		DEGs n=551

## Sheet: B) All genes
Ensembl	GeneID	logFC	logCPM	F	PValue	FDR	IL-28RA-/- mouse 1	IL-28RA-/- mouse 2	IL-28RA-/- mouse 3	IL-28RA-/- mouse 4	IL-28RA-/- mouse 5	WT mouse 1	WT mouse 2	WT mouse 3
ENSMUSG00000000001.4	Gnai3	0.0771782	6.97641	1.43256	0.239807	1	2484	2560	2845	2898	2629	2718	3035	2985
ENSMUSG00000000003.15	Pbsn	0	-3.49827	0	1	1	0	0	0	0	0	0	0	0
ENSMUSG00000000028.15	Cdc45	-0.232384	2.07643	1.17734	0.285698	1	77	75	87	82	62	69	128	112
ENSMUSG00000000031.16	H19	-2.9412	1.36037	16.2152	0.000554811	0.119493	24	27	31	40	25	31	38	716
ENSMUSG00000000037.17	Scml2	0.285199	-0.240313	0.688145	0.412709	1	13	14	15	34	12	18	13	18
ENSMUSG00000000049.11	Apoh	-0.0566585	-2.70385	0.00388522	0.950672	1	1	1	1	3	1	0	1	4
ENSMUSG00000000056.7	Narf	0.273776	4.4301	12.1248	0.00141346	0.193421	419	487	496	555	496	497	465	429
ENSMUSG00000000058.6	Cav2	0.301848	8.35549	11.1796	0.00205691	0.233598	6820	6756	7752	8351	6776	6531	6069	7721
ENSMUSG00000000078.7	Klf6	-0.153328	7.6963	3.00653	0.0921891	1	2916	4811	4146	5219	3811	4939	5150	5763
ENSMUSG00000000085.16	Scmh1	0.0262506	5.53717	0.130484	0.720215	1	788	1062	1114	1141	991	1197	1120	1105
ENSMUSG00000000088.7	Cox5a	0.0714664	5.63145	0.335758	0.566793	1	1278.77	979.76	971.78	1039.81	1116.82	1143.91	1187.71	1227.67
ENSMUSG00000000093.6	Tbx2	0.393536	8.08888	14.8164	0.000510329	0.115071	5479	6717	7126	7750	7541	6343	5580	6138
ENSMUSG00000000094.12	Tbx4	0.257154	6.60819	7.00003	0.0123515	0.521593	1844	2479	2732	2638	2213	2504	2049	2257
ENSMUSG00000000103.12	Zfy2	0	-3.49827	0	1	1	0	0	0	0	0	0	0	0
ENSMUSG00000000120.6	Ngfr	-0.0594326	1.41322	0.0667592	0.797707	1	46	50	75	79	34	63	73	65
ENSMUSG00000000125.5	Wnt3	-1.25735	-2.43286	2.17112	0.150024	1	0	2	0	2	3	7	4	1
ENSMUSG00000000126.11	Wnt9a	0.475147	3.56328	17.9487	0.000168989	0.0606687	287	303	349	390	309	290	218	300
ENSMUSG00000000127.15	Fer	0.0297018	3.87571	0.121292	0.729832	1	287	309	341	350	297	337	390	337
ENSMUSG00000000131.15	Xpo6	-0.075876	6.12932	1.45373	0.236435	1	1154	1499	1601	1528	1390	1595	1735	1849
ENSMUSG00000000134.17	Tfe3	-0.098999	5.89178	1.93516	0.173429	1	925	1294	1340	1379	1197	1581	1524	1384
ENSMUSG00000000142.15	Axin2	0.185278	5.32538	3.33708	0.0767188	1	762	941	919	1178	974	1052.97	858	963
ENSMUSG00000000148.17	Brat1	0.00685107	4.84681	0.00696683	0.93398	1	442	667	721	660	594	719	710	667
ENSMUSG00000000149.10	Gna12	0.0558314	7.04061	0.59456	0.446103	1	2821.76	2989.94	3162.86	2952.83	2578.48	3316.77	3062.8	3224.59
ENSMUSG00000000154.16	Slc22a18	0.0517531	2.91525	0.0793675	0.779942	1	203	118	170	182	131	185	158	193
ENSMUSG00000000157.16	Itgb2l	0.0766176	0.531429	0.0557813	0.814741	1	17	38	17	28	53	40	30	30
ENSMUSG00000000159.16	Igsf5	0.0956196	4.22246	0.713302	0.404382	1	411.69	369	420.1	418	411	436	428	445.45
ENSMUSG00000000167.14	Pih1d2	-0.0774158	2.76117	0.239163	0.62802	1	130	119	138	129	140	166	146.32	165
ENSMUSG00000000168.9	Dlat	0.142731	5.23802	4.97753	0.0325325	0.762038	774	757	927	886	836	928	772	903
ENSMUSG00000000171.5	Sdhd	0.0604189	6.3308	0.33419	0.567191	1	1953	1589	1773	1798	1566	1959	1840	1953
ENSMUSG00000000182.9	Fgf23	-1.63006	-1.86248	2.10303	0.159702	1	4	1	2	2	0	0	13	7
ENSMUSG00000000183.6	Fgf6	0	-3.47585	0	1	1	0	0	0	0	0	0	0	0
ENSMUSG00000000184.12	Ccnd2	-0.123976	7.32924	2.60052	0.116276	1	2793.75	3341.36	3540.93	3708.18	3023.04	3823.81	4395.89	4019.27
ENSMUSG00000000194.13	Gpr107	-0.0281835	6.36298	0.251051	0.619635	1	1486	1725	1915	1893.68	1690	2037	2026	2025
ENSMUSG00000000197.8	Nalcn	0.324436	-0.928599	0.765152	0.387992	1	6	7	10	10	11	6	8	10
ENSMUSG00000000202.9	Btbd17	-1.13023	-0.773723	9.60884	0.00392522	0.313458	8	7	10	7	7	12	31	16
ENSMUSG00000000204.16	Slfn4	-0.710751	3.53963	2.68598	0.115316	1	86.5	435	210.79	183.51	778.08	467.8	617	837.87
ENSMUSG00000000214.11	Th	-1.80834	-3.45391	1.64883	0.217104	1	0	0	0	0	0	0	0	1
ENSMUSG00000000215.11	Ins2	0	-3.4539	0	1	1	0	0	0	0	0	0	0	0
ENSMUSG00000000216.8	Scnn1g	0.116431	7.1021	1.81451	0.187072	1	2632	3086	3382	3582	3385	3301	3257	3605
ENSMUSG00000000223.13	Drp2	-0.156027	0.28635	0.319767	0.575542	1	25	23	38	26	19	25	39	36
ENSMUSG00000000244.17	Tspan32	-0.139664	3.80065	1.32433	0.258021	1	208	230	284	251	238	302	313	299.69
ENSMUSG00000000247.11	Lhx2	-0.647848	-2.53311	0.791176	0.380132	1	2	2	3	4	0	5	1	6
ENSMUSG00000000248.16	Clec2g	-1.24583	-1.43952	2.50156	0.123487	1	2	3	1	0	1	2	5	5
ENSMUSG00000000253.13	Gmpr	0.206041	3.49229	2.11342	0.155382	1	280.7	254.88	278.4	253	246.18	257.11	209	321.17
ENSMUSG00000000263.15	Glra1	0	-3.47588	0	1	1	0	0	0	0	0	0	0	0
ENSMUSG00000000266.11	Mid2	-0.117628	6.33234	1.66882	0.205319	1	1322	1422	1802	1877	1573	2036	1886	2012
ENSMUSG00000000275.16	Trim25	-0.38816	6.96074	9.8101	0.00403296	0.316023	1910	2796	2777	3085	2577	3865	4372	3493
ENSMUSG00000000276.11	Dgke	0.087398	5.14408	0.975574	0.330424	1	535	664	796	801	794	726	740	847
ENSMUSG00000000278.10	Scpep1	-0.0256286	5.98809	0.114819	0.736853	1	1277	1375	1544	1576	1164	1598	1692	1546
ENSMUSG00000000282.12	Mnt	0.281841	5.41056	4.77098	0.0374282	0.796302	722	1040	1071	1346	1134	1037	942	1001
ENSMUSG00000000290.13	Itgb2	-0.183591	7.37314	3.18902	0.0832532	1	2272	3449	3571.99	3198	2921	3656	4497	3801
ENSMUSG00000000295.13	Hddc2	-0.0834764	2.54814	0.255265	0.616723	1	117	93	119	116	108	125	128	151
ENSMUSG00000000296.8	Tpd52l1	-0.178107	0.117632	0.376844	0.543472	1	21	11	20	23	15	24	22	24
ENSMUSG00000000301.16	Pemt	0.173137	0.391523	0.373853	0.545067	1	35	30	25	29	23	28	29	30
ENSMUSG00000000303.12	Cdh1	0.0472077	8.42099	0.468507	0.498416	1	6104	7333	8346	8680	7757	8029	8745	8530
ENSMUSG00000000305.12	Cdh4	-0.587706	2.83836	17.2773	0.000212754	0.0697696	132	109	146	138	100	218	230	197
ENSMUSG00000000308.14	Ckmt1	-0.174187	4.20208	1.68743	0.203428	1	435	331	398	406	328	396	535	547
ENSMUSG00000000317.11	Bcl6b	-0.419987	5.60114	8.2891	0.00793216	0.429229	622	807	910	1077	756	1389	1403	1004
ENSMUSG00000000318.16	Clec10a	-0.440749	3.45999	5.90889	0.0216621	0.658549	298.08	259.17	329.18	284.96	190.96	376.82	520.3	372.39
ENSMUSG00000000320.10	Alox12	-0.235367	3.37235	0.583831	0.452594	1	131	236	170	180	256	167	246	377
ENSMUSG00000000325.16	Arvcf	-0.0305854	5.4524	0.104105	0.748977	1	715.16	936.1	1067.52	933.64	851.39	1224	980.61	942.86
ENSMUSG00000000326.13	Comt	0.087937	6.3851	1.05368	0.312067	1	2004.35	1832.63	1939.36	1885.22	1691.61	2062	2025.95	1985.71
ENSMUSG00000000339.14	Rtca	0.146018	4.2991	1.70051	0.201172	1	449	414	428	449	408	408	452	479
ENSMUSG00000000340.10	Dbt	0.110607	4.63059	1.96996	0.169718	1	485	521	543	590	607	564	548	638
ENSMUSG00000000346.9	Dazap2	0.0847993	8.48383	0.834599	0.36752	1	8150.16	7248.22	8035.95	8134.13	7377	8467.41	7944.57	8934.11
ENSMUSG00000000355.13	Mcts1	0.0845813	4.19409	0.767428	0.387296	1	380	349	365	420	382	410	421	400
ENSMUSG00000000359.3	Rem1	-0.0280165	3.2986	0.0343675	0.854053	1	163	208	236	231	199	277	229	217
ENSMUSG00000000365.9	Rnf17	-0.771445	-1.4491	2.42882	0.128586	1	2	4	7	3	6	10	8	8
ENSMUSG00000000374.8	Trappc10	-0.0970413	6.18559	2.75682	0.106238	1	1304	1394	1547	1575	1387	1714	1832	1744
ENSMUSG00000000378.15	Ccm2	0.0186761	5.30675	0.0356852	0.851315	1	828	791	823	832	802	988	907	879
ENSMUSG00000000381.10	Wap	0	-3.49827	0	1	1	0	0	0	0	0	0	0	0
ENSMUSG00000000384.15	Tbrg4	-0.0179994	4.38644	0.0508855	0.82291	1	370.25	400	485	457	398	454	527.1	483
ENSMUSG00000000385.8	Tmprss2	-0.0730402	6.81709	0.810246	0.374517	1	2091	2338	2490	2632	2049	2510	2728	3134
ENSMUSG00000000386.16	Mx1	-1.2802	3.57323	9.89909	0.0046454	0.332817	151	282.7	226	254.63	151	291	966.1	501
ENSMUSG00000000392.17	Fap	-0.293576	0.646972	1.24276	0.272928	1	15	46	34	36	32	47	56	33
ENSMUSG00000000394.15	Gcg	-0.36752	-3.3486	0.0689572	0.794835	1	0	1	0	0	0	0	1	0
ENSMUSG00000000399.10	Ndufa9	0.0498316	5.5671	0.227278	0.636666	1	1040	905	1012	1059	917	1075	1092	1118
ENSMUSG00000000402.2	Egfl6	0.0351286	6.21516	0.0938075	0.76151	1	1181	1876	1802	2015	1559	1838	2060	1707
ENSMUSG00000000409.14	Lck	-0.147464	5.27439	0.684009	0.416355	1	520	506	573	558	581	580	699	811
ENSMUSG00000000411.7	Tssk3	0.422758	-2.55561	0.178524	0.675363	1	1	1	0	0	4	0	2	1
ENSMUSG00000000416.16	Cttnbp2	-0.143451	3.35688	1.13254	0.294897	1	121.87	206	185	198.92	187	266.77	207.49	204.49
ENSMUSG00000000420.15	Galnt1	-0.022547	7.01222	0.0769634	0.783172	1	2597	2545.4	2722.13	2815.25	2597.17	2860.33	3240	3185.1
ENSMUSG00000000435.1	Myf5	1.43714	-3.30869	1.01047	0.323029	1	0	0	0	1	0	0	0	0
ENSMUSG00000000439.9	Mkrn2	0.111195	5.57293	3.19344	0.0830491	1	917.38	1013.21	1023.7	1148.02	987	1121.99	979.35	1135.67
ENSMUSG00000000440.12	Pparg	0.530213	3.41645	20.5897	7.04954e-05	0.0342713	305	276	293	267	279	213	211	256
ENSMUSG00000000441.17	Raf1	0.0046347	6.69334	0.00707514	0.93347	1	1796.18	2164.51	2351.58	2304.71	2077.73	2577.76	2337.95	2391.14
ENSMUSG00000000486.13	2001-09-01	-0.287355	5.01628	7.78949	0.0086374	0.446542	440	441	538	468	458	622	658	688
ENSMUSG00000000489.7	Pdgfb	0.304077	7.12823	13.2909	0.00090132	0.15614	2801	3178	3606	3705	3243	2965	2884	3332
ENSMUSG00000000530.16	Acvrl1	0.100077	9.40307	1.26642	0.268492	1	13971	15472	17901	16869	14656	18948	14820	16716
ENSMUSG00000000531.5	Grasp	0.226379	4.53801	5.43627	0.0259236	0.705052	544	563	543	634	601	590	527	581
ENSMUSG00000000532.11	Acvr1b	-0.0713714	6.47114	0.581789	0.450987	1	1377	1922	2156	2378	1967	2449	2308	2260
ENSMUSG00000000538.18	Tom1l2	0.0403093	6.83359	0.244846	0.62398	1	1937	2372	2845.96	2788	2386	2927	2599	2667
ENSMUSG00000000544.14	Gpa33	-0.720075	-2.05688	0.629421	0.433363	1	1	1	0	4	0	1	3	3
ENSMUSG00000000552.10	Zfp385a	-0.133036	3.97734	1.3852	0.24757	1	335	348	414	338	303	382	505	422
ENSMUSG00000000555.8	Itga5	-0.187077	6.24244	3.44497	0.0723207	0.985514	1340	1657	1914	1732	1362	2167	2063	2002
ENSMUSG00000000560.9	Gabra2	0	-3.47583	0	1	1	0	0	0	0	0	0	0	0
ENSMUSG00000000561.14	Wdr77	-0.094964	5.48024	2.4525	0.126802	1	766.97	909.31	1051.99	1004.9	950.01	1121.07	1165.36	1140.18
ENSMUSG00000000562.5	Adora3	-0.732957	1.35466	5.4935	0.0262968	0.709886	66.5	58.5	56.46	37.89	34	86	152.7	52.14
ENSMUSG00000000563.17	Atp5f1	0.107148	7.12086	0.684513	0.415132	1	3334.88	2758.46	3017.66	3143.87	2763.74	2997.9	3284.59	3351.95
ENSMUSG00000000567.5	Sox9	-0.258301	0.330171	0.632472	0.432088	1	22	25	21	31	25	23	34	45
ENSMUSG00000000568.15	Hnrnpd	0.0608454	6.47834	0.810415	0.374468	1	1614.88	1805.59	1930.48	2238.56	1920.49	1968.61	2106.15	2173.34
ENSMUSG00000000579.14	Dynlt1c	0.121698	3.93778	1.06471	0.309586	1	242.83	349.89	329.19	404.85	398.81	356.35	301.54	429.14
ENSMUSG00000000581.8	C1d	0.266419	4.55138	5.01315	0.0319583	0.757367	516	455	489	509	432	457	432	488
ENSMUSG00000000594.7	Gm2a	-0.0469806	7.28462	0.244351	0.62433	1	3217	3245	3315	3270	2876	3743	3916	3672
ENSMUSG00000000600.15	Krit1	-0.0733337	5.51363	0.609712	0.440417	1	632	922	961	1010	975	1076	1113	1046
ENSMUSG00000000605.9	Clcn4	0.108149	6.8249	3.05233	0.0898482	1	1970.23	2407.16	2648.26	2703.44	2448.12	2713.19	2411.49	2613.77
ENSMUSG00000000606.18	Vmn2r88	0	-3.49827	0	1	1	0	0	0	0	0	0	0	0
ENSMUSG00000000617.14	Grm6	-0.948337	-0.917725	3.82403	0.0589646	0.92712	3	3	3	8	3	6.67	14	6
ENSMUSG00000000627.15	Sema4f	0.353892	4.74166	12.9676	0.00101964	0.163548	433	676	622	751	656	558	585	533
ENSMUSG00000000628.10	Hk2	-0.0622414	4.7418	0.299803	0.587661	1	429	545	601	593	694	583	733	734
ENSMUSG00000000631.20	Myo18a	-0.0232273	7.21361	0.0935618	0.761603	1	2367	2886	3424	3398	3144	3519	3709	3343
ENSMUSG00000000632.13	Sez6	1.6888	-2.91331	2.08962	0.157658	1	0	3	1	1	1	0	0	1
ENSMUSG00000000673.9	Haao	-0.179177	2.94942	1.68835	0.202752	1	88	124	158	142	132	156	163	179
ENSMUSG00000000682.7	Cd52	-0.343381	6.66922	2.37186	0.137443	1	1676	1351	1362	1306	1161	1750	2245	2034
ENSMUSG00000000686.11	Abhd15	-0.165899	1.87856	0.886703	0.35316	1	72.91	71.1	71.83	52.7	69.75	86.33	84.63	91.8
ENSMUSG00000000690.5	Hoxb6	0.459778	1.67015	6.95958	0.0125835	0.523113	85	78	57	80	83	63	52	78
ENSMUSG00000000693.10	Loxl3	0.0398513	4.17892	0.159407	0.692254	1	316.53	445.99	468.78	442.45	346.64	483.43	431.35	428.48
ENSMUSG00000000701.8	Tcl1b5	0	-3.49827	0	1	1	0	0	0	0	0	0	0	0
ENSMUSG00000000706.16	Btn1a1	0.328415	-3.1763	0.0536269	0.818377	1	0	0	1	1	0	0	1	0
ENSMUSG00000000708.14	Kat2b	0.0223837	6.34885	0.160732	0.691047	1	1501.8	1754.89	1813.94	1924.9	1752.79	2042.68	1936.69	1929.78
ENSMUSG00000000711.3	Rab5b	0.081719	7.50642	1.47135	0.233676	1	3844.25	4010.38	4310.31	4191.95	3571.53	4328.83	4250.06	4371.17
ENSMUSG00000000724.10	Cryba1	0	-3.36889	0	1	1	0	0	0	0	0	0	0	0
ENSMUSG00000000730.13	Dnmt3l	0.108177	-0.970917	0.0777332	0.782119	1	3	9	9	7	13	7	12	7
ENSMUSG00000000731.15	Aire	-0.465129	-1.09907	0.715846	0.403555	1	6	6	6	4	0	6	9	6
ENSMUSG00000000732.9	Icosl	-0.0472668	5.42175	0.21143	0.64864	1	612	975	1025	937	788	997	1069	991
ENSMUSG00000000738.18	Spg7	0.0982991	5.62176	2.5856	0.11729	1	960	1028	1200	1171	1055	1107	1139	1225
ENSMUSG00000000739.14	Sult5a1	0.197796	3.33062	2.35426	0.134398	1	206	248	276	272	276	262	251	251
ENSMUSG00000000740.12	Rpl13	0.0853092	8.43162	0.175445	0.679181	1	8719.04	5688.67	6660.95	6629.46	6317.71	7311.63	6957.29	8033.8
ENSMUSG00000000743.9	Chmp1a	0.0134938	6.56095	0.0323	0.858461	1	1928.83	1898.84	2123.74	2071.77	1792.99	2227.04	2162.94	2301.78
ENSMUSG00000000751.13	Rpa1	-0.046272	6.03026	0.350104	0.558054	1	1257	1257	1407	1354	1388	1483	1567	1689
ENSMUSG00000000753.15	Serpinf1	0.0695372	4.92664	0.323302	0.573764	1	772	602	786	799	592	839	712	778
ENSMUSG00000000759.14	Tubgcp3	-0.125426	5.88748	2.26071	0.142128	1	865	1291	1255	1344	1097	1423	1412	1527
ENSMUSG00000000766.18	Oprm1	1.44488	-3.45384	0.995128	0.333099	1	0	1	0	0	0	0	0	0
ENSMUSG00000000776.13	Polr3d	0.0153633	3.86613	0.0244621	0.87666	1	280	304	329	319	331	326	349	389
ENSMUSG00000000782.16	Tcf7	0.0240774	5.77139	0.056652	0.813328	1	747	1042	1119	1174	1102	1081	1152	1253
ENSMUSG00000000787.12	Ddx3x	-0.0345367	8.85612	0.202513	0.655619	1	7021.47	9129.31	9978.32	11092	9524.07	10505.1	10713	11492
ENSMUSG00000000791.9	Il12rb1	-0.325065	1.98722	1.35389	0.25412	1	69	61	72	55	45	80	89	92
ENSMUSG00000000792.2	Slc5a5	0.114653	-0.419582	0.0933505	0.761864	1	8	19	8	13	12	18	10	10
ENSMUSG00000000794.9	Kcnn3	0.242513	3.6199	3.66707	0.0641284	0.947685	241	340	335	278	300	335	264	268
ENSMUSG00000000804.14	Usp32	0.0271223	5.59992	0.134511	0.716122	1	766	980	1024	1155	1043	1065	1100	1172
ENSMUSG00000000805.18	Car4	0.35262	7.3161	12.8867	0.00105182	0.166949	4362	3958	4213	4516	3749	3778	3407	4051
ENSMUSG00000000811.13	Txnrd3	0.24398	4.14173	6.53187	0.0153462	0.569279	376	386	474	444	382	397	410	387
ENSMUSG00000000817.10	Fasl	-0.161648	0.854432	0.470386	0.497562	1	26	30	38	28	24	31	42	39
ENSMUSG00000000823.16	Zfp512b	-0.103937	5.89879	0.546582	0.466311	1	766	1214.97	1366	1454	1307	1557.94	1441.96	1470
ENSMUSG00000000826.16	Dnajc5	-0.173653	7.29342	10.5829	0.00262009	0.261636	2497	3050	3137	3205	2835	3743	3804	3840
ENSMUSG00000000827.18	Tpd52l2	0.141378	6.18938	3.60498	0.0663086	0.957613	1525	1579	1768	1756	1502	1693	1675	1695
ENSMUSG00000000838.17	Fmr1	0.01867	5.59921	0.0274324	0.869522	1	607	914.01	1017	1178	968	958	1073	1117
ENSMUSG00000000861.15	Bcl11a	-0.329486	2.99766	4.22063	0.0478592	0.868141	99	135	158	139	118	147	229	181
ENSMUSG00000000869.12	Il4	-0.137846	-0.900766	0.0771063	0.782976	1	7	14	4	8	8	8	19	4
ENSMUSG00000000876.11	Pxmp4	-0.0839351	5.05943	0.904431	0.348455	1	666	603	679	679	561	855	719	753
ENSMUSG00000000881.12	Dlg3	0.058701	5.22991	0.719554	0.402352	1	762	739	831	894	815	939	827	902
ENSMUSG00000000884.17	Gnb1l	0.114902	1.95985	0.532712	0.470577	1	79	78.69	80	76	75.48	91	73.38	83.43
ENSMUSG00000000889.8	Dbh	-1.36515	-2.53278	2.6739	0.111434	1	2	0	2	3	0	4	1	8
ENSMUSG00000000901.17	Mmp11	0.152535	5.41678	3.689	0.0633776	0.945732	745.18	977.36	1070.47	1089.17	829.23	1013.08	925.25	957.16
ENSMUSG00000000902.13	Smarcb1	0.0460867	5.98044	0.49689	0.485776	1	1149	1413	1444	1587	1369	1529	1537	1553
ENSMUSG00000000903.3	Vpreb3	-0.0485188	3.61647	0.0961194	0.758566	1	202	236	241	259	214	232	261	325
ENSMUSG00000000915.15	Hip1r	-0.133076	6.78248	2.50905	0.122655	1	1540.94	2083.24	2311.07	2486.72	2149.24	2763.31	2554.21	2595.54
ENSMUSG00000000916.15	Nsun5	0.0376416	4.15663	0.197966	0.659249	1	300.2	371.64	400.98	419.49	355.21	428.45	377.28	427
ENSMUSG00000000934.9	Top1mt	-0.157747	2.12917	1.09025	0.303944	1	83	97	86	86	75	111	105	112
ENSMUSG00000000938.11	Hoxa10	0	-3.4322	0	1	1	0	0	0	0	0	0	0	0
ENSMUSG00000000942.10	Hoxa4	0.0950906	2.67283	0.441349	0.511051	1	129.83	137.8	146.7	163.86	122.95	177.61	134.86	137.61
ENSMUSG00000000948.16	Gm38393	-0.360356	-1.35432	0.28322	0.598244	1	0	1	4	8	3	3	8	3
ENSMUSG00000000957.11	Mmp14	-0.230968	6.61402	3.15609	0.0868778	1	1561	2029	2063	2131	1654	2653	2795	2119
ENSMUSG00000000958.10	Slc7a7	0.0666613	4.49277	0.580198	0.451601	1	459.85	497.36	573.71	556.49	395.65	516.55	575.65	531.52
ENSMUSG00000000959.7	Oxa1l	0.0955002	5.4079	1.65923	0.206595	1	878.15	918.64	1020.29	979.51	843.35	1039.45	984.35	959.48
ENSMUSG00000000976.13	Heatr6	-0.166318	4.83102	4.47742	0.0419131	0.824788	467	572	611	589	548	709	742	693
ENSMUSG00000000982.5	Ccl3	-0.643749	0.566315	4.87078	0.0343221	0.777028	15	30	32	19	23	30	71	26
ENSMUSG00000000983.13	Wfdc18	1.07701	-2.56747	1.78527	0.190571	1	1	5	3	2	2	2	2	0
ENSMUSG00000001014.6	Icam4	-0.251796	-0.054259	0.727469	0.399804	1	22.89	13.4	17.34	18.87	11.78	31.47	17.31	20.52
ENSMUSG00000001016.12	Ilf2	0.0416485	5.65443	0.465593	0.499745	1	958.44	1075.03	1067.5	1179.66	1038.22	1177.85	1125.21	1247.84
ENSMUSG00000001017.15	Chtop	0.122909	7.12956	5.0924	0.0307202	0.745989	2627	2973.98	3150.99	3397	2875.98	2954	3125.99	3384.98
ENSMUSG00000001018.15	Snapin	0.0846088	6.04622	0.943117	0.338486	1	1436.56	1319.97	1443.5	1456.34	1409.78	1498.15	1487.79	1611.16
ENSMUSG00000001020.8	S100a4	-0.187432	5.56004	0.509995	0.482538	1	1202	784	817	781	633	863	1203	1280
ENSMUSG00000001021.13	S100a3	-0.0751023	-1.57874	0.0240625	0.877663	1	4	4	7	2	5	3	4	9
ENSMUSG00000001023.10	S100a5	0	-3.34874	0	1	1	0	0	0	0	0	0	0	0
ENSMUSG00000001025.8	S100a6	0.0171951	7.78309	0.00668152	0.935564	1	5666	3871	4419	4757	4855	4267	5396	6521
ENSMUSG00000001027.7	Scn4a	-0.455234	1.56891	3.93341	0.0556401	0.912662	24	46	71	61	35	68	78	74
ENSMUSG00000001029.15	Icam2	0.208069	7.40693	4.1042	0.0508578	0.883441	4146	3957	4231	4278	3531	4355	3495	4170
ENSMUSG00000001034.17	Mapk7	-0.108009	5.32792	2.04329	0.162203	1	638	874	947	923	820	1073	1022	1001
ENSMUSG00000001036.17	Epn2	0.0148206	7.21819	0.0584023	0.810523	1	2712	2929	3339	3561	3155	3645	3389	3619
ENSMUSG00000001039.12	B9d1	0.139007	2.86759	0.848642	0.363569	1	164	133	157	147	153	134	165	174
ENSMUSG00000001052.15	Sec24b	-0.00702934	6.34627	0.00714069	0.933163	1	1345	1856	1868	1858	1752	2041	1938	1994
ENSMUSG00000001053.15	N4bp3	-0.0315605	5.31897	0.157606	0.693905	1	799	931	860	846	821	1004	945	1049
ENSMUSG00000001054.9	Rmnd5b	0.059516	4.95123	0.510053	0.480097	1	655	643	722	708	607	758	676	768
ENSMUSG00000001056.3	Nhp2	0.0844726	4.0966	0.18229	0.673099	1	436	310	336	333	342	406	357	387
ENSMUSG00000001062.18	Vps9d1	-0.0231996	4.90313	0.0750466	0.78582	1	535	694	705	731	561	778	705	761
ENSMUSG00000001065.15	Zfp276	-0.0957312	5.17429	0.870037	0.357665	1	528.39	792.97	825.29	771.41	667.6	888.12	885.94	843.54
ENSMUSG00000001076.7	C1ql4	0	-3.47593	0	1	1	0	0	0	0	0	0	0	0
ENSMUSG00000001082.12	Mfsd10	-0.00643426	4.97413	0.00758626	0.931115	1	625	627	702	746	540	766	752	714
ENSMUSG00000001089.14	Luzp1	-0.00672518	6.56479	0.00673344	0.935093	1	1908	1914	2029	2016	1831	2276	2294	2136
ENSMUSG00000001095.5	Slc13a2	-0.577753	0.570261	2.86068	0.100941	1	20	39.8	45.9	26.91	19	34.87	56.87	62.9
ENSMUSG00000001098.15	Kctd10	0.143243	8.752	4.29068	0.0461497	0.856359	9085.15	9459.44	10212.6	11195.9	9123.12	10423.6	9515.52	10575.5
ENSMUSG00000001100.10	Poldip2	0.142742	5.54196	2.09227	0.157402	1	1094	1000	982	1010	996	1149	1010	1023
ENSMUSG00000001103.7	Sebox	1.17866	-3.25019	0.872309	0.357959	1	2	1	0	1	0	1	0	0
ENSMUSG00000001105.15	Ift20	0.156181	5.44544	2.42334	0.129002	1	1002	881	950	1040	869	981	959	993
ENSMUSG00000001119.7	Col6a1	-0.163759	8.72943	1.46754	0.235911	1	7762	10042	10931	10640	8630	10442	15263	10997
ENSMUSG00000001120.15	Pcbp3	0.118738	4.32776	1.36464	0.251039	1	444	422	463	506	380	505	431	466
ENSMUSG00000001123.15	Lgals9	-0.288785	6.69114	9.17539	0.00471694	0.334471	2377	2482	2431	2524	2140	2968	4002	3071
ENSMUSG00000001127.12	Araf	-0.0149858	6.56047	0.047368	0.829038	1	1487	1982	2116	2105	1907	2246	2140	2250
ENSMUSG00000001128.7	Cfp	-0.353075	5.01309	2.80805	0.107321	1	712	731	728	621	554	742	1329	872
ENSMUSG00000001131.11	Timp1	-0.535989	3.85473	1.09832	0.305912	1	469	226	279	260	224	193	872	406
ENSMUSG00000001134.9	Uxt	-0.0225331	2.93103	0.0170717	0.896832	1	165.74	137.25	162	133.91	154.27	173.78	180.5	174.61
ENSMUSG00000001138.13	Cnnm3	0.0624495	5.35066	0.41288	0.524915	1	654	955	1057	992	854	1069	895	987
ENSMUSG00000001143.13	Lman2l	-0.023855	4.9253	0.14616	0.704664	1	570	641	691	716	615	781	748	725
ENSMUSG00000001150.7	Mcm3ap	-0.16182	5.7201	3.62039	0.0657599	0.955303	769.75	1015.46	1123.75	1098.72	974	1182.47	1327	1301.5
ENSMUSG00000001151.10	Pcnt	-0.0887239	6.64429	1.00845	0.322523	1	1556	1874.98	1994	2187	1877	2300	2402.97	2202
ENSMUSG00000001155.13	Ftcd	1.08424	-2.27823	2.27369	0.141025	1	4	6	2	3	1	1	1	3
ENSMUSG00000001156.9	Mxd1	-0.169869	5.60401	2.04788	0.162931	1	779	1151	899	1091	1287	1122	1297	1613
ENSMUSG00000001157.13	Gmcl1	0.153487	4.53511	3.29134	0.0786735	1	433	470	542	509	570	461	546	553
ENSMUSG00000001158.13	Snrnp27	0.138062	4.49771	0.966561	0.33364	1	501	447	478	529	427	470	499	522
ENSMUSG00000001166.17	Oas1c	-0.216172	2.70756	3.04374	0.090282	1	125.84	128.93	126.93	149	111	156	183	173
ENSMUSG00000001168.16	Oas1h	-1.3193	-3.07256	1.14223	0.294552	1	0	1	0	1	0	1	2	1
ENSMUSG00000001173.15	Ocrl	0.0711809	5.34665	1.37982	0.248471	1	741	811	932	1031	854	959	944	944
ENSMUSG00000001175.15	Calm1	0.119041	9.51521	1.20252	0.280693	1	16820	15384	15949	16906	14706	15319	16810	18575
ENSMUSG00000001211.15	Agpat3	0.118084	7.12802	2.88912	0.0985123	1	2805	2970	3212	3213	2798	3408	3002	3086
ENSMUSG00000001225.12	Slc26a3	-0.42805	-1.86899	0.673147	0.417797	1	6	2	4	3	1	6	4	5
ENSMUSG00000001227.12	Sema6b	-0.141057	3.73228	0.872429	0.357368	1	230	239	300	253	281	327	316	345
ENSMUSG00000001228.14	Uhrf1	-0.25895	4.19231	0.723381	0.404044	1	352.71	348.35	390.88	416.54	229.33	306.5	561.72	557.1
ENSMUSG00000001229.9	Dpp9	-0.0542316	6.32103	0.611427	0.439781	1	1420	1771	1988	1699	1582	2013	2020	1988
ENSMUSG00000001240.13	Ramp2	0.393848	8.21053	14.3548	0.00060479	0.125749	8497.62	7156.67	7422.56	8462.78	7129.88	6835.25	6111.02	7397.54
ENSMUSG00000001247.16	Lsr	0.190865	5.51271	4.09214	0.05118	0.885283	1034.94	960.02	1059.07	1158.35	996.69	1094.06	946.41	1101.57
ENSMUSG00000001248.15	Gramd1a	-0.190717	6.54633	1.60114	0.217423	1	1139	1904.83	1967.97	1911	1784.97	2312.91	2202	2265
ENSMUSG00000001249.14	Hpn	0.0624037	3.55767	0.289487	0.594131	1	254	257	248	267	227	292	277	257
ENSMUSG00000001260.10	Gabrg1	0	-3.49827	0	1	1	0	0	0	0	0	0	0	0
ENSMUSG00000001270.9	Ckb	0.0623874	6.43409	0.429581	0.516702	1	2060.06	1947.55	2050.71	1926.2	1744.63	2112.01	2150.21	2168.2
ENSMUSG00000001280.13	Sp1	-4.36981e-05	7.01042	6.25233e-07	0.999374	1	2280	2447	2686	2777	2491	2954	2901	2850
ENSMUSG00000001281.10	Itgb7	-0.312585	6.0001	9.37925	0.00432511	0.323484	972	1143	1207	1037	1091	1488	1579	1589
ENSMUSG00000001285.12	Myg1	-0.0156496	4.63626	0.0521839	0.820704	1	476.9	482.83	533.32	557.81	508.55	593.18	546.45	639.79
ENSMUSG00000001288.15	Rarg	0.281755	6.51859	13.7926	0.000745745	0.142517	1862	2207	2430	2514	2228	2136	1947	2255
ENSMUSG00000001289.12	Pfdn5	0.0787953	6.7526	0.212834	0.648727	1	2528.48	1894.23	2117.5	2320.55	2047.36	2479.7	2098.46	2573.76
ENSMUSG00000001300.16	Efnb2	0.0841396	7.70472	0.43762	0.513625	1	3846	4979	5374	5040	4343	5551	4800	4876
ENSMUSG00000001305.5	Rrp15	-0.0663298	3.33767	0.257857	0.614946	1	204	214	205	186	208	247	251	237
ENSMUSG00000001313.12	Rnd2	0.209216	3.25969	3.00202	0.0924231	1	233.32	186.65	223.42	219.1	205.38	233.15	177.32	227.47
ENSMUSG00000001323.17	Srr	-0.00659575	4.97602	0.0073011	0.932419	1	657.98	609.83	633.48	680.75	665.4	810.62	720.31	718.59
ENSMUSG00000001333.9	Sync	-0.0759389	1.34676	0.102507	0.750844	1	44.46	42.4	70.03	72.35	47.31	45.16	76.47	77.07
ENSMUSG00000001334.9	Fndc5	0.237686	2.72419	1.07085	0.309553	1	119	135	166	224	177	203	120	152
ENSMUSG00000001348.15	Acp5	-0.272966	5.19056	3.41894	0.0757931	1	648	622.98	667	562	520.99	716.99	1019.97	778.97
ENSMUSG00000001349.5	Cnn1	0.245743	5.5646	2.14744	0.155645	1	1293	943	1382	1350	859	818	1208	1353
ENSMUSG00000001366.14	Fbxo9	0.16989	5.45626	6.01809	0.0195652	0.63485	904	986	1026	1017	971	1081	945	972
ENSMUSG00000001376.17	Vps50	-0.0200196	4.5975	0.0835353	0.774356	1	459	524	527	541	496	566	619	589
ENSMUSG00000001380.7	Hars	0.0559077	5.25962	0.455295	0.504494	1	808	763.17	831.27	873.43	715.46	863.18	832.97	947.39
ENSMUSG00000001383.9	Zmat2	0.0803184	5.80984	1.14479	0.292343	1	1180	1133	1228	1296	1097	1309	1228	1326
ENSMUSG00000001403.13	Ube2c	-0.0219469	3.10464	0.00533226	0.942408	1	248	175	178	248.14	119	158	225	295.81
ENSMUSG00000001415.10	Smg5	-0.0558695	6.24922	0.710466	0.405309	1	1181	1557	1657	1677	1567	1871	1800	1763
ENSMUSG00000001416.13	Cct3	-0.0287018	6.65611	0.181611	0.672737	1	1958	2049	2278	2220	1975	2305	2497	2545
ENSMUSG00000001418.13	Glmp	0.0690516	6.83811	0.748913	0.393019	1	2617.32	2436.09	2646.69	2565.43	2298.44	2824.01	2729.58	2704.58
ENSMUSG00000001419.17	Mef2d	-0.0797939	7.16269	0.649633	0.425968	1	2061.33	2977.45	3328.87	3541.06	2830.11	3802.82	3378.14	3429.25
ENSMUSG00000001420.13	Tmem79	0.127364	2.54164	0.915694	0.345511	1	142.68	118.91	141.31	129.57	123.56	133.99	122.42	158.42
ENSMUSG00000001424.14	Snd1	-0.0154365	6.72804	0.0428843	0.837206	1	1972	2199	2628	2564	2115	2429	2809	2703
ENSMUSG00000001435.15	Col18a1	-0.216185	6.46242	4.32408	0.0456059	0.854094	1760	1910	2106	2011	1427	2079	2787	2471
ENSMUSG00000001436.15	Slc19a1	0.0658031	2.91601	0.275101	0.603408	1	152	143	192	158	130	183	174	151
ENSMUSG00000001440.5	Kpnb1	0.0163414	7.61118	0.076786	0.783416	1	3644	3984	4289	4585	4111	4402	4808	4777
ENSMUSG00000001441.13	Npepps	-0.00262796	6.27756	0.00121849	0.972363	1	1328	1819	1720	1885	1698	1954	1971	1871
ENSMUSG00000001444.2	Tbx21	-0.0845492	2.73407	0.21472	0.64611	1	74	112	130	103	98	107	129	139
ENSMUSG00000001445.10	Mrpl10	0.0668578	5.34783	0.841556	0.365555	1	873.82	813.91	910.94	981.94	804.92	948	938.85	992.93
ENSMUSG00000001467.5	Cyp51	-0.266908	5.4775	2.62841	0.117815	1	824	723.4	912.72	835	679	769	1376.35	1141.22
ENSMUSG00000001472.17	Tcf25	-0.0220469	8.30233	0.0988744	0.755148	1	4946	6511	7332	7361	6526	7792	7216	7668
ENSMUSG00000001473.7	Tubb6	-0.000182208	5.1719	7.46131e-07	0.999318	1	922	848	843	886	610	670	1140	1022
ENSMUSG00000001482.15	Def8	0.00235439	4.97239	0.0009847	0.975154	1	619	630	703	716	600	771	696	775
ENSMUSG00000001493.9	Meox1	0.148172	4.40432	1.14758	0.292674	1	442	479	545	524	378	546	475	443
ENSMUSG00000001494.6	Sost	1.00065	-0.532109	5.84246	0.021284	0.653871	18	20	22	26	11	9	7	17
ENSMUSG00000001496.15	Nkx2-1	0.127986	7.16154	2.79716	0.103812	1	2452	3095	3255	3506	3209	3438	3089	3195
ENSMUSG00000001497.18	Pax9	-0.211342	0.150753	0.269903	0.607264	1	8	23	34	30	12	22	18	44
ENSMUSG00000001504.10	Irx2	0.0073888	5.55683	0.00584799	0.939502	1	706	985	893	1223	908	1157	1007	1038
ENSMUSG00000001506.10	Col1a1	-0.14217	8.79371	0.405787	0.530459	1	7716	12117	12709	12035	7978	12615	16080	10698
ENSMUSG00000001507.16	Itga3	0.0189345	8.15365	0.0503963	0.823748	1	4684	6120	7367	7045	6174	6662	7130	7360
ENSMUSG00000001508.15	Sgca	0.070283	0.427914	0.105539	0.747315	1	30	31	28	42	34	31	32	45
ENSMUSG00000001510.8	Dlx3	-0.0578145	-2.65282	0.00565164	0.945516	1	1	1	2	2	1	2	1	2
ENSMUSG00000001517.14	Foxm1	-0.0961457	3.97887	0.142552	0.709209	1	329	353.99	313.97	406.98	195	302	463.97	404.96
ENSMUSG00000001518.12	Itfg2	0.0361822	4.24643	0.243712	0.624781	1	346	394	429	427	396	422	426	486
ENSMUSG00000001520.12	Nrip2	-0.130782	-0.27814	0.0997877	0.754058	1	2	6.77	23	16	9	17	12	13
ENSMUSG00000001521.12	Tulp3	-0.0686572	5.18857	1.08338	0.305449	1	676	789	792	853	802	966	884	968
ENSMUSG00000001524.14	Gtf2h4	0.0744068	3.30283	0.398574	0.532141	1	195	183	233	214	192	217	207	240
ENSMUSG00000001525.10	Tubb5	-0.00125255	8.52659	9.97153e-05	0.9921	1	8377	8034	8805	8661	6498	7605	10342	9855
ENSMUSG00000001542.7	Ell2	-0.174237	5.15928	5.50225	0.0251004	0.695544	536	583	631	722	532	731	809	781
ENSMUSG00000001552.14	Jup	0.310781	8.79977	15.1017	0.000459893	0.109389	9759	11389	12636	11360	10365	10458	9306	10972
ENSMUSG00000001555.10	Fkbp10	0.0682418	5.03358	0.58636	0.449229	1	684.39	744.29	812.46	838.27	712.3	797.58	879.38	803.41
ENSMUSG00000001558.5	Klhl10	-0.841696	-1.42834	4.89426	0.0339194	0.774046	3	6	3	8	5	11	7	13
ENSMUSG00000001566.9	Mnx1	0	-3.49827	0	1	1	0	0	0	0	0	0	0	0
ENSMUSG00000001569.10	Nom1	0.0295116	5.05769	0.170442	0.682368	1	606	645	746	737	764	816	768	770
ENSMUSG00000001576.15	Ergic1	0.143214	6.30284	4.49494	0.0415382	0.823557	1754	1836	1836	1921	1719	1879	1840	1933
ENSMUSG00000001583.13	Tnk1	-0.120505	3.53343	1.072	0.307963	1	183	292.39	251.98	244.25	198.39	286.54	314.83	269
ENSMUSG00000001588.12	Acap1	-0.36769	5.20339	4.7232	0.0396445	0.810453	363	584	649	509	545	706	831	801
ENSMUSG00000001604.14	Tcea3	-0.0820236	4.40823	0.454979	0.504641	1	400	398	461	469	365	543	465	513
ENSMUSG00000001622.15	Csn3	0	-3.43206	0	1	1	0	0	0	0	0	0	0	0
ENSMUSG00000001627.12	Ifrd1	0.0559827	5.63639	0.555942	0.461136	1	1009.76	1026.74	1081.82	1193.31	1136.85	1131.77	1248.18	1224.34
ENSMUSG00000001630.13	Stk38l	-0.104794	4.84193	1.63199	0.210271	1	462.39	568.03	615.46	682.28	564.61	639.24	751.41	736.9
ENSMUSG00000001632.16	Brpf1	-0.112198	5.7384	1.96796	0.169928	1	770.93	1091.94	1166.88	1267.98	1100.9	1348.9	1312.97	1321.39
ENSMUSG00000001642.18	Akr1b3	0.140227	6.63534	2.29839	0.138953	1	2190.46	2051.43	2207.72	2265.95	1933.16	2260.35	2177.52	2219.02
ENSMUSG00000001655.6	Hoxc13	0	-3.49827	0	1	1	0	0	0	0	0	0	0	0
ENSMUSG00000001656.3	Hoxc11	0	-3.49827	0	1	1	0	0	0	0	0	0	0	0
ENSMUSG00000001657.7	Hoxc8	0	-3.45402	0	1	1	0	0	0	0	0	0	0	0
ENSMUSG00000001661.5	Hoxc6	-0.439352	-3.12338	0.103648	0.749638	1	0	1	0	1	0	0	0	2
ENSMUSG00000001663.10	Gstt1	0.0509088	6.01726	0.227718	0.63645	1	1442	1314	1368	1467	1218	1449	1580	1501
ENSMUSG00000001665.11	Gstt3	0.0479698	5.49855	0.241146	0.626603	1	1009	857	975	1006.84	943	1172.77	996	1028
ENSMUSG00000001666.8	Ddt	0.0686602	4.60391	0.186245	0.669565	1	596	427	463	478.77	515	551.78	555	533
ENSMUSG00000001670.13	Tat	0.526752	-1.35347	0.623185	0.43615	1	7	6	6	9	16	6	3	12
ENSMUSG00000001672.14	Marveld3	0.109114	3.45844	0.872971	0.356866	1	259	212	284	270	226	267	287	243
ENSMUSG00000001674.11	Ddx18	0.0101473	5.06219	0.019807	0.888926	1	640.69	689.89	718.73	720.16	667.8	764.5	784.2	798.52
ENSMUSG00000001687.15	Ubl3	0.0792252	7.45803	1.20678	0.279858	1	3748	3775	4134	4352	3739	4494	4008	4349
ENSMUSG00000001700.10	Gramd3	-0.182933	4.68566	3.98977	0.0540089	0.903113	338	447	477	516	482	521	628	606
ENSMUSG00000001707.8	Eef1e1	-0.162862	3.04326	1.04455	0.31414	1	173	167	126	149	144	195	210	183
ENSMUSG00000001729.14	Akt1	0.0620226	7.6424	0.794574	0.379122	1	4294	4411	4781	4897	4069	4984	4883	4912
ENSMUSG00000001739.14	Cldn15	0.0625681	3.14673	0.0531008	0.819691	1	127	190	191	229	211	179	220	221
ENSMUSG00000001741.12	Il16	-0.26774	5.78012	12.8308	0.00107466	0.168245	770.95	962.6	1093.28	906.45	912.86	1298.32	1250.44	1288.61
ENSMUSG00000001750.16	Tcirg1	-0.227785	6.63451	2.97544	0.0960372	1	1495	2347	2252	1962	1778	2527	2857	2492
ENSMUSG00000001751.9	Naglu	-0.0387002	5.09814	0.239558	0.627737	1	705	704	717	775	648	820	889	798
ENSMUSG00000001755.12	Coasy	0.0158499	4.71288	0.040559	0.841618	1	526	552	581	589	532	688	586	617
ENSMUSG00000001761.7	Smo	0.0784414	5.32625	0.753071	0.391722	1	731	991	1062	1054	899	1080	1024	962
ENSMUSG00000001763.14	Tspan33	0.193815	2.37825	1.56467	0.219709	1	80	118	95	111	100	120	96	86
ENSMUSG00000001767.5	Crnkl1	-0.0244201	4.79344	0.14164	0.709045	1	530	570	609	624	567	683	680	663
ENSMUSG00000001768.16	Rin2	0.210351	7.46226	5.78456	0.0218861	0.66344	3917	3719	4323	4516	4463	4323	3570	4573
ENSMUSG00000001773.14	Folh1	0.125884	-1.42735	0.0547768	0.816385	1	10	3	4	7	9	5	3	13
ENSMUSG00000001774.8	Chordc1	-0.120679	5.56387	1.55151	0.221614	1	640	942	903	976	910	1018	1160	1072
ENSMUSG00000001783.3	Rtcb	0.0697833	6.78127	0.589096	0.448182	1	2378	2139	2287	2412	2153	2507	2344	2624
ENSMUSG00000001785.13	Pwp1	-0.0665675	4.54241	0.60971	0.440418	1	454	471	513	484	449	589	558	561
ENSMUSG00000001786.14	Fbxo7	-0.115977	4.47675	2.31829	0.13731	1	402.43	436.83	487.53	458.4	447.44	601.78	541.32	519
ENSMUSG00000001794.13	Capns1	0.0896392	7.95416	1.34061	0.255171	1	5606	5223	5628	5983	5019	5770	5810	6197
ENSMUSG00000001802.16	Lrp3	0.141344	3.96879	2.26453	0.141802	1	296.04	401.29	380.01	386.05	311.68	356.99	366.3	379.55
ENSMUSG00000001804.9	Dsg4	0	-3.49827	0	1	1	0	0	0	0	0	0	0	0
ENSMUSG00000001815.15	Evx2	0	-3.454	0	1	1	0	0	0	0	0	0	0	0
ENSMUSG00000001819.4	Hoxd13	0	-3.38966	0	1	1	0	0	0	0	0	0	0	0
ENSMUSG00000001823.5	Hoxd12	0	-3.49827	0	1	1	0	0	0	0	0	0	0	0
ENSMUSG00000001827.12	Folr1	0.302708	-1.44437	0.309663	0.581611	1	3	6	3	9	8	9	4	3
ENSMUSG00000001829.17	Clpb	0.11912	4.75492	2.49525	0.123653	1	590	598	616	592.99	539	577	655	630
ENSMUSG00000001833.17	2007-09-01	0.0633509	7.53742	0.927687	0.342414	1	3104	3974.82	4146	4573	3736.66	4118	4126	4544.44
ENSMUSG00000001844.10	Zdhhc4	0.105234	4.84381	1.43322	0.239701	1	598	583	658	647	611	705	603	674
ENSMUSG00000001847.14	Rac1	0.142395	8.67339	5.35184	0.0270203	0.71616	8870.01	9120.21	9889.4	10174.6	9234.07	9801.1	9431.65	10236.9
ENSMUSG00000001855.15	Nup214	-0.138535	5.83103	2.84145	0.10122	1	852.76	1114.42	1343.46	1164.65	965.49	1340.11	1437.75	1311.75
ENSMUSG00000001864.13	Aif1l	-0.146535	2.90576	0.970669	0.331625	1	196	152	196	169	129	171	264	207
ENSMUSG00000001865.2	Cpa3	-0.0939552	0.0928218	0.0868504	0.770051	1	13	18	26	25	21	20	28	27
ENSMUSG00000001870.16	Ltbp1	-0.144806	6.6695	1.85439	0.18285	1	1546	2393	2351	2431	2269	2729	3101	2462
ENSMUSG00000001891.16	Ugp2	0.172835	6.32034	3.38031	0.0749215	0.997172	1883	1682	1799	1872	1803	1865	1746	1926
ENSMUSG00000001901.15	Kcnh6	0.674125	-1.33477	1.60901	0.213436	1	3	7	14	8	6	6	8	2
ENSMUSG00000001909.16	Trmt1	0.0405197	5.21726	0.449747	0.507084	1	647	773	842	807	769	894	820	846
ENSMUSG00000001910.5	Nacc1	0.0227839	6.67617	0.130279	0.720425	1	1984.36	2159.2	2629.16	2267.15	1986.92	2391.43	2564.39	2487.82
ENSMUSG00000001911.16	Nfix	0.174198	7.13017	1.09182	0.306399	1	2188.74	3688.03	4050.62	3788.89	3161.36	3530.04	3332.8	3316.43
ENSMUSG00000001918.17	Slc1a5	0.0522152	7.39784	0.72255	0.401385	1	2847	3599	3811	3835	3674	4001	3700	4045
ENSMUSG00000001924.15	Uba1	-0.0160355	7.88655	0.0723997	0.789536	1	4197	5029	5653	5358	4602	5521	5888	5792
ENSMUSG00000001930.17	Vwf	-0.760174	9.09371	12.4549	0.00180089	0.22479	8160	10206	10816	9961	9161	20792	19137	16118
ENSMUSG00000001942.8	Siae	-0.0668571	4.72947	0.75129	0.392277	1	499.83	583.52	640.86	526.79	476.28	673.67	628.74	660.3
ENSMUSG00000001943.8	Vsig2	0.161544	4.21203	2.30603	0.138319	1	327	402	469	478	361	434	405	405
ENSMUSG00000001946.14	Esam	0.150753	7.93905	4.39911	0.0436352	0.838849	5073	5436	5673	6230	5759	6362	5319	5759
ENSMUSG00000001948.10	Spa17	-0.0611497	2.82996	0.157197	0.694282	1	166.15	123	127	150.5	107	166	147.85	172
ENSMUSG00000001962.8	Fam50a	0.0307015	4.75886	0.199876	0.657718	1	463	571	588	660	581	605	608	708
ENSMUSG00000001964.14	Emd	0.0925922	5.48073	0.780419	0.383352	1	985.99	939.14	988.74	1046.68	874.4	979.1	1016.53	1128.17
ENSMUSG00000001983.7	Taco1	-0.154029	2.89151	1.82081	0.186329	1	142.67	142.24	164.17	163.02	115.05	177.34	196.33	181.28
ENSMUSG00000001985.9	Grik3	-0.513468	-2.47555	0.493333	0.48733	1	2	3	4	0	2	3	3	5
ENSMUSG00000001986.16	Gria3	0.188144	4.29565	2.47141	0.125397	1	313	440	437	557	418	440	428	428
ENSMUSG00000001988.9	Npas1	0.38692	-0.932674	1.17626	0.285917	1	8	10	14	7	7	9	10	5
ENSMUSG00000001995.9	Sipa1l2	-0.0707826	6.49825	0.671204	0.418463	1	1380	1883	2143	2037	1820	2445	2204	1993
ENSMUSG00000001998.15	Ap4e1	-0.181917	3.80787	2.04691	0.161842	1	146	274	244	272	224	306	311	280
ENSMUSG00000001999.15	Blvra	0.157139	4.16136	2.27507	0.140908	1	447	373	408	433	358	389	428	432
ENSMUSG00000002006.12	Pdzd4	0.118043	2.90606	0.809697	0.374677	1	142.7	154.12	186.69	190	159.27	198	179	148
ENSMUSG00000002007.5	Srpk3	-0.342687	2.57368	3.01589	0.0917048	1	55	114	115	110	93	140	128	153
ENSMUSG00000002010.17	Idh3g	0.085603	6.12704	1.46334	0.234925	1	1561	1443	1670	1652	1381	1666	1583	1751
ENSMUSG00000002012.13	Pnck	0.0144642	1.47463	0.00613534	0.938036	1	52	60	48	56	45	41	64	73
ENSMUSG00000002014.12	Ssr4	0.0547197	5.88531	0.162923	0.689684	1	1424	1082	1235	1239	1076	1211	1424	1398
ENSMUSG00000002015.5	Bcap31	0.159409	6.65108	3.14463	0.085333	1	2290	2140	2192	2429	2083	2369	2214	2288
ENSMUSG00000002017.10	Fam98a	-0.0784994	5.17679	1.23044	0.275275	1	627	706	784	777	684	853	910	827
ENSMUSG00000002020.15	Ltbp2	-0.267096	7.53003	2.48096	0.128297	1	2019.65	3262.54	3543.44	3107.72	3350.61	5106.54	3862.75	3589.65
ENSMUSG00000002028.13	Kmt2a	-0.249503	6.79423	5.67742	0.0232185	0.677637	1314	1931	1967	2171	1764	2450	2524	2443
ENSMUSG00000002031.13	Ift46	0.162749	5.05248	3.29944	0.0783236	1	748	671	765	841	659	756	707	801
ENSMUSG00000002032.17	Tmem25	0.111479	1.42727	0.381512	0.541	1	52	49	62	49	53	54	51	64
ENSMUSG00000002033.14	Cd3g	-0.282151	4.28616	2.99484	0.0948305	1	252	239	240	234	202	288	299	393
ENSMUSG00000002043.17	Trappc6a	-0.123797	4.12315	0.916517	0.345308	1	379	304	330	365	321	430	421	427
ENSMUSG00000002052.6	Supt6	-0.200319	6.847	6.21602	0.0178069	0.608626	1596.54	2198.8	2452.76	2418.8	2020.05	2742.61	2849.69	2788.91
ENSMUSG00000002055.9	Spag5	-0.138074	3.06591	0.200919	0.65811	1	164	174	167	218	115	154	258	219
ENSMUSG00000002057.4	Foxn1	0	-3.36894	0	1	1	0	0	0	0	0	0	0	0
ENSMUSG00000002058.13	Unc119	0.147407	4.66939	1.58697	0.216526	1	542	557	542	596	539	671	539	515
ENSMUSG00000002059.18	Rab34	0.136223	4.59752	2.2762	0.140812	1	507	516	563	596	493	625	505	542
ENSMUSG00000002064.10	Sdf2	0.0141642	5.4856	0.0368799	0.848877	1	925.46	954.2	987.24	1060.2	843.95	1167.39	995.31	1085.09
ENSMUSG00000002068.16	Ccne1	-0.254703	1.74638	1.03016	0.317486	1	63	48	64	62	41	53	95	80
ENSMUSG00000002076.12	Hsf2bp	0.406498	-1.40624	1.12191	0.297499	1	5	5	10	8	9	7	6	6
ENSMUSG00000002083.13	Bbc3	0.199825	3.73653	3.68455	0.0635291	0.946005	283	292	306	311	349	336	296	292
ENSMUSG00000002100.15	Mybpc3	0.123249	3.25969	0.0877941	0.76974	1	81	208	266	323	312	261	133	348
ENSMUSG00000002102.15	Psmc3	0.0617571	6.63601	0.563484	0.458137	1	2120	2047	2239	2273	1970	2293.89	2326	2403.63
ENSMUSG00000002103.16	Acp2	-0.0590801	6.19065	1.01359	0.321311	1	1271.78	1592.86	1575.67	1595.29	1439.44	1799.64	1825.35	1715.75
ENSMUSG00000002104.11	Rapsn	0.116345	0.702757	0.280604	0.599823	1	27	32	37	27	33	30	31	38
ENSMUSG00000002105.15	Slc39a13	0.147697	5.70986	4.66105	0.0381615	0.802333	938	1298	1254	1365	1117	1236.11	1155	1298.37
ENSMUSG00000002107.18	Celf2	-0.0381034	6.62028	0.276621	0.602413	1	1523	1784	1942	2192	1789	1938	2250	2297
ENSMUSG00000002108.10	Nr1h3	0.297271	5.49275	12.4863	0.0012276	0.18289	1024	1048	1163	1176	1086	1139	951	985
ENSMUSG00000002109.14	Ddb2	-0.286333	4.10667	6.09952	0.01882	0.623445	211.22	325.14	338.33	310.71	311.56	428.36	400.65	420.25
ENSMUSG00000002111.8	Spi1	-0.0201573	5.3774	0.0220888	0.882954	1	1008	935	977	923	928	963	1231	1147
ENSMUSG00000002129.11	Sf3a1	-0.105812	5.95434	2.22344	0.145351	1	1027	1361	1483	1363	1242	1526	1640	1604
ENSMUSG00000002147.18	Stat6	-0.0313453	7.41253	0.256124	0.616133	1	2820	3733	4012	3936	3489	4300	4120	4157
ENSMUSG00000002190.13	Clgn	0.514154	-1.37694	0.304155	0.585567	1	2	4	1	7	3	5	3	0
ENSMUSG00000002204.9	Napsa	0.224414	8.42555	4.20581	0.0482512	0.86949	7957.54	7402.02	7418.37	8169.06	7513.37	8571.95	7302.33	6831.68
ENSMUSG00000002205.16	Vrk3	0.0626063	5.21597	0.730446	0.398852	1	771	778	827	802	737	858	798	927
ENSMUSG00000002210.11	Smg9	0.0233599	4.47231	0.100184	0.753586	1	381	436	524	510	442	495	510	540
ENSMUSG00000002221.11	Paxip1	0.0174575	5.05697	0.0578387	0.811421	1	592	703	747	745	693.22	783	778	798
ENSMUSG00000002222.14	Rmnd5a	0.0855904	6.88374	1.66977	0.205194	1	2088	2479	2630	2821	2492	2824	2697	2554
ENSMUSG00000002227.15	Mov10	-0.259311	4.73029	4.49883	0.0419498	0.824788	370	641	693	613	505	663	868	769
ENSMUSG00000002228.7	Ppm1j	-0.163861	2.32567	1.10095	0.30162	1	56	103	95	105	93	113	102	131
ENSMUSG00000002233.13	Rhoc	0.0603504	6.3735	0.240305	0.62777	1	1953	1762	1878	1939	1621	2110	1960	1983
ENSMUSG00000002240.12	Prr27	0	-3.49827	0	1	1	0	0	0	0	0	0	0	0
ENSMUSG00000002249.21	Tead3	-0.0530642	5.07013	0.439045	0.512148	1	614	739	796	838	655	870	885	830
ENSMUSG00000002250.16	Ppard	-0.0686276	5.25053	0.552834	0.462381	1	626	792	966	900	782	1016	928	970
ENSMUSG00000002257.8	Def6	-0.0757927	4.3434	0.661566	0.421791	1	345.64	354.19	378.16	390.04	353.25	450.28	418.45	451.53
ENSMUSG00000002265.17	Peg3	0.0599084	4.5083	0.0366107	0.849991	1	292	500	557	620	441	796	422	350
ENSMUSG00000002266.17	Zim1	0.00513015	0.132206	0.000167292	0.989765	1	16	27	38	18	16	39	31	8
ENSMUSG00000002274.13	Metrn	0.023236	3.59953	0.024018	0.877778	1	291	212	244	241	220	290	246	287
ENSMUSG00000002279.19	Lmf1	0.0428341	4.07772	0.213573	0.64699	1	364	295	409	360	354	418	389	384
ENSMUSG00000002280.11	Ciao3	0.00360059	4.59163	0.00222081	0.962695	1	420.83	501.94	548.83	550.59	511.96	602.4	563.32	567.1
ENSMUSG00000002289.16	Angptl4	-0.444414	5.84911	1.3947	0.250112	1	773	1187	1145	1193	571	1861	1420	1225
ENSMUSG00000002297.16	Dbf4	-0.0974379	3.40747	0.463528	0.500691	1	216	215	222	202	166	224	253	276
ENSMUSG00000002307.16	Daxx	-0.203582	5.18531	5.89806	0.0207228	0.647668	731	864	810	882	751	982	1237	971
ENSMUSG00000002308.16	Cd320	0.147475	3.18666	0.976831	0.330117	1	235	183	191	202	190	213	215	197
ENSMUSG00000002319.16	Ipo4	-0.104712	5.1368	1.94328	0.172555	1	605.63	740	801	801	740	881	935	900.88
ENSMUSG00000002320.15	Tm9sf1	0.00107975	6.45281	0.000291179	0.986488	1	1745.49	1765	2123	2072.42	1768.21	2195	2179	2120.86
ENSMUSG00000002324.8	Rec8	-0.400117	3.01641	6.6484	0.0145337	0.559865	119	166	129	160	111	213	195	212
ENSMUSG00000002325.15	Irf9	-0.537793	6.19126	14.9689	0.000659966	0.132441	1302	1681	1718	1787	1437	2355	3058	2451.16
ENSMUSG00000002326.6	Gmpr2	0.0360891	4.16784	0.183192	0.671403	1	386.17	383.09	388.52	383.83	338.13	437.94	431.94	392.71
ENSMUSG00000002329.7	Mdp1	-0.0158097	5.19783	0.0426802	0.837588	1	720	764	771	796	724	896	860	870
ENSMUSG00000002332.16	Dhrs1	0.100605	5.46769	1.91252	0.175896	1	956	938	992	1065	913	1018	1045	1058
ENSMUSG00000002341.8	Ncan	-0.873608	-1.02383	3.32159	0.0773748	1	4	4	10	3	5	11	10	12
ENSMUSG00000002342.17	Tmem161a	0.0490763	5.06659	0.491936	0.487942	1	603	700	815	791	672	852	751	767
ENSMUSG00000002343.11	Armc6	-0.0319634	3.10696	0.0742784	0.786891	1	141.21	186.48	219.05	165.36	163.78	188.23	217.11	208.25
ENSMUSG00000002345.18	Borcs8	-0.128413	3.98026	2.68336	0.110827	1	296	326	315	356	291	394	410	385
ENSMUSG00000002346.16	Slc25a42	-0.124828	4.46835	0.251448	0.620876	1	276	499	605	561	341	722	478	486
ENSMUSG00000002365.10	Snx9	-0.00927959	5.93292	0.0230929	0.880134	1	1191	1340	1378	1545	1224	1563	1513	1532
ENSMUSG00000002372.9	Ranbp3	0.0432863	6.05886	0.568576	0.45613	1	1190	1468	1565	1561	1355	1599	1567	1580
ENSMUSG00000002379.7	Ndufa11	0.0838773	4.91047	0.257006	0.616604	1	766	543	668	679	610	678	647	808
ENSMUSG00000002384.2	Bmp8b	-0.0926673	-2.27837	0.0161954	0.8995	1	0	3	5	2.01	1	1	4	3
ENSMUSG00000002393.14	Nr2f6	0.224631	5.15314	4.58687	0.0396305	0.810453	868.87	736.35	728.91	765.56	869.7	812.15	747.33	794.15
ENSMUSG00000002395.14	Use1	0.0174128	5.93004	0.0140901	0.90644	1	1326	1008	1273	1283	1109	1472	1225	1394
ENSMUSG00000002396.8	Ocel1	-0.0404391	5.10336	0.146546	0.704293	1	494.13	717.65	783.09	884.44	665.3	837.85	834.67	809.85
ENSMUSG00000002409.18	Dyrk1b	0.328241	4.2262	13.0003	0.00100698	0.163548	420	414	518	519	419	427	385	439
ENSMUSG00000002413.15	Braf	-0.0568453	6.03865	0.665418	0.420456	1	1031.47	1215	1350	1517.73	1301	1466	1554	1545
ENSMUSG00000002416.13	Ndufb2	0.0825808	4.78545	0.522248	0.474934	1	646.53	576	584	644.25	509.89	626	650	651.99
ENSMUSG00000002428.12	Hltf	-0.0397329	5.47571	0.25469	0.617118	1	647	898.96	986.97	1048.36	925	1008	1070	1085
ENSMUSG00000002455.14	Prpf6	-0.0473349	5.95048	0.427775	0.517579	1	965	1194	1444	1381	1356	1554	1423	1506
ENSMUSG00000002458.13	Rgs19	-0.0242299	4.86304	0.0773966	0.782579	1	585	669	616	593	544	669	735	702
ENSMUSG00000002459.17	Rgs20	-0.104613	-1.8474	0.0262576	0.872253	1	2	3	3	7	4	2	3	9
ENSMUSG00000002475.16	Abhd3	-0.182339	2.62021	1.50781	0.228091	1	110	123	121	113	111	151	134	167
ENSMUSG00000002477.5	Snrpd1	0.0742277	4.4124	0.190447	0.666175	1	565	396.83	424	465	412	433.64	540	515.7
ENSMUSG00000002486.15	Tchp	-0.125607	4.16691	1.14512	0.292275	1	236	380	427	387	368	465	457	416
ENSMUSG00000002489.16	Tiam1	-0.140357	5.10447	2.14803	0.152141	1	513	657	757	735	589	822	889	735
ENSMUSG00000002496.10	Tsc2	0.0570416	7.01117	0.589227	0.448132	1	2168.99	2812.25	3157.81	3026	2643.65	3060.61	2884.8	3134.78
ENSMUSG00000002500.15	Rpl3l	-0.452395	-0.868977	1.17897	0.285371	1	11	13	13	11	10	11	7	37
ENSMUSG00000002504.15	Slc9a3r2	0.453773	8.53554	21.9456	4.58273e-05	0.0253979	9688	9091	9975	9819	9127	8228	7239	8563
ENSMUSG00000002524.17	Puf60	0.0456187	6.81559	0.455231	0.504523	1	2320	2261	2616	2560	2300	2613	2677	2744
ENSMUSG00000002546.16	Golga2	0.00376063	6.73382	0.00201717	0.964445	1	1662	2357	2550	2428	2285	2592	2562	2538
ENSMUSG00000002550.16	Uck1	-0.0156179	5.45232	0.0455065	0.832377	1	894.44	880.87	979.22	879.77	858.53	1057.89	1013.89	1058.27
ENSMUSG00000002565.16	Scin	-0.715208	2.73259	1.28288	0.269448	1	217	102	216	128	57	59	389	370
ENSMUSG00000002578.18	Ikzf4	-0.406664	2.88254	6.56837	0.0150866	0.56516	96	127	158	137	130	206	206	175
ENSMUSG00000002580.7	Mien1	0.0819849	4.75399	0.331887	0.569157	1	649.92	514.89	517.94	593.99	490.98	609.9	599.98	597.99
ENSMUSG00000002588.13	Pon1	0.183284	4.90124	0.218934	0.644414	1	583	420	513	599	641	920	225	535
ENSMUSG00000002602.16	Axl	0.107781	7.44156	1.86522	0.181187	1	3661	3999	4693	4246	3783	4427	4490	4054
ENSMUSG00000002603.15	Tgfb1	0.105333	6.25482	1.96175	0.170585	1	1631	1733	1852	1919	1569	1750	1963	1841
ENSMUSG00000002608.8	Ccdc97	-0.000877845	5.78022	0.000140437	0.990616	1	975	1333	1343	1286	1118	1371	1413	1364
ENSMUSG00000002617.14	Zfp40	0.126616	3.90695	1.37189	0.249808	1	215	315	327	382	269	283	303	356
ENSMUSG00000002625.10	Akap8l	-0.10358	6.82869	0.468459	0.499991	1	1405	2520	2610	2598	2070	2830	2548	2812
ENSMUSG00000002633.4	Shh	-0.267448	3.50153	4.37975	0.0440727	0.84197	233.82	227.98	236	243.73	225.73	389.91	284	293.87
ENSMUSG00000002635.11	Pdcd2l	0.0875888	3.42078	0.567788	0.456439	1	216	220	247	248	231	259	228	265
ENSMUSG00000002658.9	Gtf2f1	-0.00571008	5.06177	0.00533003	0.942238	1	645	718	752	767	649	789	814	831
ENSMUSG00000002660.8	Clpp	0.0494423	4.20867	0.191046	0.664872	1	420	382	387	383	371	439	423	435
ENSMUSG00000002661.14	Alkbh7	0.296564	2.90018	3.9707	0.0545547	0.906053	186	130	179	146	167	154	153	148
ENSMUSG00000002664.2	Pspn	0.587408	-2.55531	0.448446	0.507696	1	3	1	2	2	1	2	0	2
ENSMUSG00000002668.8	Dennd1c	-0.287326	5.04191	2.78821	0.107681	1	340	564	591	615	556	651	806	761
ENSMUSG00000002679.14	Med6	0.124015	3.88075	1.97791	0.168883	1	300	325	333	347	323	348	337	342
ENSMUSG00000002688.8	Prkd1	0.100485	4.36966	1.13474	0.294437	1	369	454	474	538	465	461	455	554
ENSMUSG00000002699.13	Lcp2	-0.144313	4.90456	1.01554	0.322435	1	470	685	664	623	467	663	718	820
ENSMUSG00000002718.14	Cse1l	-0.0673421	5.76299	0.379492	0.542281	1	964	1070	1237	1119	1036	1201	1297	1406
ENSMUSG00000002728.14	Naa20	0.0670865	5.01699	0.415329	0.523696	1	774.98	674.52	678.89	745.39	626.23	744.75	744.47	818.45
ENSMUSG00000002731.6	Prkra	0.0331189	3.97937	0.153952	0.697289	1	331	362	329	359	298	379	352	399
ENSMUSG00000002732.14	Fkbp7	0.157364	4.23858	2.07801	0.158783	1	443	370	399	445	380	411	412	437
ENSMUSG00000002733.8	Plekha3	0.0834844	5.52697	1.46776	0.234235	1	956	970	1037	1092	986	1013	1088	1172
ENSMUSG00000002741.9	Ykt6	0.0552217	6.66827	0.665637	0.42038	1	2158	2108	2341	2356	2095	2458	2498	2364
ENSMUSG00000002748.7	Baz1b	-0.142406	7.1637	2.18897	0.14841	1	1955	2746	3150	3217	2860	3444	3656	3381
ENSMUSG00000002763.16	Pex6	0.0645093	5.72799	0.630199	0.432908	1	924	1146	1288	1289	1097	1362	1168	1228
ENSMUSG00000002767.13	Mrpl2	0.166835	4.20049	2.51454	0.122261	1	397	359	398	465	426	419	422	412
ENSMUSG00000002768.8	Mea1	0.0348651	5.20463	0.0469689	0.830184	1	874.85	737.96	744.87	827.55	658.92	843.8	816.96	932.34
ENSMUSG00000002769.9	Gnmt	0.697446	1.84526	8.84897	0.00542589	0.356712	101	57	87	80	89	66	39	72
ENSMUSG00000002771.12	Grin2d	-0.0255785	2.10102	0.0191867	0.890667	1	76.13	98.66	97.12	98.54	111.82	109.39	119.18	108.44
ENSMUSG00000002778.14	Kdelr1	0.159099	6.84612	3.22293	0.0817031	1	2847	2422	2700	2673	2286	2736	2583	2675
ENSMUSG00000002781.19	Tmem143	-0.114806	3.50292	1.38537	0.247541	1	223	214	253	250	189	273	262	305
ENSMUSG00000002791.17	Pdxk-ps	-0.516607	-2.5326	0.4466	0.508564	1	1	4	2	1	1	4	3	2
ENSMUSG00000002797.9	Ggct	-0.220822	2.82961	2.92716	0.0964114	1	129	129	127	132	135	172	170	182
ENSMUSG00000002799.6	Jag2	0.368749	5.30595	8.744	0.00609822	0.380475	730	996	1089	1135	967	773	778	1054
ENSMUSG00000002803.14	Btbd6	0.208964	4.18688	3.87277	0.0574565	0.92156	406	402	419	450	370	464	370	384
ENSMUSG00000002804.4	Nudt14	-0.0242026	3.90809	0.0343677	0.854052	1	338	259	297	330	295	334	371	361
ENSMUSG00000002808.7	Epdr1	0.0370673	4.07498	0.11793	0.733451	1	348	299	346	353	338	386	345	401
ENSMUSG00000002812.4	Flii	-0.0209094	7.44284	0.0814422	0.777122	1	2897	3728	4295	4209	3726	4307	4283	4487
ENSMUSG00000002814.15	Top3a	-0.0412831	3.70042	0.174249	0.679045	1	194	256	281	297	226	305	299	277
ENSMUSG00000002820.6	Atg4d	0.0380998	4.9987	0.248541	0.621385	1	600.28	684.09	752.39	716.58	671.2	766.94	766.18	756.07
ENSMUSG00000002825.8	Qtrt1	0.0171223	2.88564	0.0276005	0.869057	1	135	156	180	168	154	175	191	171
ENSMUSG00000002831.14	Plin4	0.157232	4.06213	0.258598	0.616053	1	248	364	490	595	362	433	386	431
ENSMUSG00000002833.11	Hdgfl2	0.0444059	5.89869	0.420459	0.521159	1	1019	1294	1429	1382	1269	1457	1361	1427
ENSMUSG00000002835.9	Chaf1a	0.0655013	4.1466	0.242097	0.62603	1	344.23	350.21	373.95	474.7	305.34	357.97	408.98	442.8
ENSMUSG00000002844.9	Adprh	0.119358	5.66679	2.38642	0.131854	1	1062	1134	1248	1245	1009	1186	1153	1263
ENSMUSG00000002845.14	Tmem39a	-0.169068	4.67035	4.29597	0.0460235	0.856103	438.94	539	569	513	425	612.97	661.97	640.94
ENSMUSG00000002846.9	Timmdc1	0.0756357	3.48682	0.52644	0.473181	1	260	223	233	260	205	265	236	272
ENSMUSG00000002847.7	Pla1a	0.0778257	0.654862	0.0641466	0.801617	1	29	22	25	23	44	41	18	35
ENSMUSG00000002870.8	Mcm2	-0.17639	4.72889	1.71604	0.200471	1	513	545	530	571	409	553	742	699
ENSMUSG00000002871.14	Tpra1	0.159062	5.66692	4.63232	0.0387234	0.804682	958	1188	1157	1345	1127	1325	1092	1126
ENSMUSG00000002881.14	Nab1	-0.0413645	6.31182	0.363715	0.55054	1	1392	1754	1899	1814	1564	1890	1952	2096
ENSMUSG00000002885.14	Adgre5	0.172517	9.37889	3.50005	0.0701849	0.9783	12409	16708.1	18091.2	17587.5	14311.2	16809.5	14580	16600.3
ENSMUSG00000002897.5	Il17ra	-0.143402	6.04881	1.83899	0.184517	1	917	1482	1549	1563	1634	1769	1724	1899
ENSMUSG00000002900.16	Lamb1	-0.0328231	7.40481	0.0465728	0.83088	1	2260	3684	4006	4131	3826	4511	4171	3789
ENSMUSG00000002908.17	Kcnn1	-0.345324	0.66365	1.99808	0.166788	1	27	30	24	30	25	42	38	39
ENSMUSG00000002910.11	Arrdc2	-0.0409287	4.35939	0.170275	0.682515	1	350	398	442	489	444	442	512	543
ENSMUSG00000002930.6	Ppp1r17	1.4473	-3.38977	1.01929	0.323072	1	0	0	0	0	1	0	0	0
ENSMUSG00000002944.15	Cd36	0.119961	10.04	1.78851	0.190179	1	20649	22838	24371	24388	23117	26721	22537	23693
ENSMUSG00000002948.19	Map2k7	0.0282471	6.22669	0.131009	0.719678	1	1206.37	1609.09	1798.64	1819.84	1540.01	1795.06	1728.53	1818.28
ENSMUSG00000002949.15	Timm44	0.0127349	5.13894	0.0296619	0.864303	1	654	753	825	735	718	882	785	843
ENSMUSG00000002957.11	Ap2a2	0.0516344	6.87911	0.782947	0.382592	1	2392.96	2614.98	2941.97	2890.95	2484.97	3013.95	2762.97	3047.96
ENSMUSG00000002963.17	Pnkp	0.0819165	4.90019	1.87422	0.180166	1	579	674	707	691	624	703	712	709
ENSMUSG00000002968.9	Med25	0.0282736	6.03638	0.229532	0.635005	1	1229	1473	1499	1532	1303	1631	1540	1561.4
ENSMUSG00000002980.14	Bcam	0.193495	9.09392	7.59572	0.00942118	0.461247	11359	12086	13286	14473	11493	11878	12310	13420
ENSMUSG00000002981.10	Clptm1	0.0844323	7.02292	1.20783	0.279651	1	2779	2856	3213	3003	2637	3126	3060	3211
ENSMUSG00000002983.17	Relb	-0.548224	5.01543	18.882	0.000151525	0.0565324	521	495	577	587	449	812	996	830
ENSMUSG00000002984.17	Tomm40	0.125943	4.76164	1.63468	0.209905	1	653.37	542	590.86	625.9	562.72	619.97	614.86	647.68
ENSMUSG00000002985.16	Apoe	-0.173578	9.29477	1.23882	0.275946	1	10606	10658	10389	10602	10800	18682	11227	11390
ENSMUSG00000002992.17	Apoc2	-0.464209	0.886381	1.73684	0.1977	1	29	39	27	27	19	59	40	35
ENSMUSG00000002996.17	Hbp1	0.278396	6.68298	12.0555	0.0014524	0.197279	2027.77	2383.26	2477.87	2784.74	2289.05	2496.71	2024.26	2236.92
ENSMUSG00000002997.15	Prkar2b	0.386288	4.69602	13.1852	0.000938301	0.15871	443	618	630	736	612	554	434	602
ENSMUSG00000003031.14	Cdkn1b	0.163511	6.50552	2.7287	0.107969	1	1360	1844	1959	2347	2027	1924	1779	2113
ENSMUSG00000003032.8	Klf4	-0.277778	7.50248	3.38622	0.0775532	1	2836	4495	3460	4270	2481	4686	4232	5627
ENSMUSG00000003033.15	Ap1m1	-0.00522919	5.79427	0.00791553	0.92964	1	1045	1198	1299	1285	1131	1319	1358	1426
ENSMUSG00000003037.16	Rab8a	0.000612146	6.2042	4.00329e-05	0.994989	1	1627	1444	1581	1581	1424	1633	1787	1862
ENSMUSG00000003038.15	Hmgn2	0.068467	6.94325	0.255335	0.617493	1	2931.77	2545.29	2476.63	2965.85	2336.32	2613.15	3070.77	3042.24
ENSMUSG00000003039.9	Fam32a	0.198008	6.69195	5.00033	0.0321637	0.757925	2059	2171	2552	2357	2258	2334	2008	2490
ENSMUSG00000003051.13	Elf3	-0.0790366	4.83497	0.524749	0.473887	1	578.74	627.63	715.49	733.54	581.22	639	809.49	896
ENSMUSG00000003053.17	Cyp2c29	0	-3.49827	0	1	1	0	0	0	0	0	0	0	0
ENSMUSG00000003062.13	Stard3nl	0.0267498	5.44587	0.0853312	0.772013	1	954	879	862	964	834	1083	962	998
ENSMUSG00000003068.16	Stk11	0.0487551	6.83507	0.765925	0.387755	1	2073.99	2401.02	2661.58	2766.77	2375.25	2840.9	2542.4	2750.32
ENSMUSG00000003070.6	Efna2	-0.0607204	1.20354	0.108176	0.744292	1	46	51	48	56	42	64	55	55
ENSMUSG00000003072.15	Atp5d	0.163046	6.62864	1.82702	0.186998	1	2570	2103	2208	2204	2030	2245	2307	2321
ENSMUSG00000003099.11	Ppp5c	0.0922305	5.89488	2.76042	0.106019	1	1229	1251	1479	1409	1233	1450	1424	1377
ENSMUSG00000003119.14	Cdk12	-0.335222	5.38599	11.4259	0.00186362	0.224855	526	765	831	863	727	1066	1107	1021
ENSMUSG00000003123.15	Lipe	-0.106637	6.07727	0.22932	0.636631	1	1015.3	1626.26	1465.5	1589.16	1107.43	2004.37	1427.83	1567.35
ENSMUSG00000003131.7	Pafah1b2	0.0378506	6.63023	0.449632	0.507139	1	1800	2090	2147	2457	2037	2373	2248	2410
ENSMUSG00000003134.10	Tbc1d8	-0.200648	5.84976	5.84283	0.0212803	0.653871	998.88	1215.13	1220.1	1137.95	1212.65	1698.34	1395.88	1477.94
ENSMUSG00000003135.15	Cnot11	0.105473	4.89644	2.4413	0.127641	1	592	661	678	628	620	704	610	721
ENSMUSG00000003153.10	Slc2a3	-0.441028	4.28357	3.92603	0.0594508	0.927961	228	418	340	317	431	382	583	653
ENSMUSG00000003154.15	Foxj2	0.0510515	6.09592	0.444972	0.509333	1	1110.96	1469.95	1580.98	1708.96	1467.87	1611.89	1529.97	1700.96
ENSMUSG00000003161.15	Sri	0.0783206	6.90584	1.00089	0.324316	1	2511	2467	2620	2820	2405	2608	2793	2957
ENSMUSG00000003166.20	Dgcr2	0.0631305	6.94344	1.24433	0.272632	1	2458.12	2698.72	2862.97	2879.95	2516.96	3122.74	2902.6	2792.62
ENSMUSG00000003184.15	Irf3	-0.045516	6.36249	0.432031	0.515516	1	1329	1710	1891	1968	1646	2043	1949	2035
ENSMUSG00000003190.12	Bcl2l12	-0.0590128	3.69669	0.504337	0.482549	1	233.41	264.2	313.23	276.77	242.59	325.33	291.2	334.19
ENSMUSG00000003198.10	Zfp959	-0.0125548	3.62774	0.0207027	0.88646	1	220.35	247.15	280.02	300.13	223.96	297.62	283.27	297.16
ENSMUSG00000003199.16	Mpnd	0.0884416	5.21627	0.874642	0.356413	1	862	750	831	862	748	889	839	901
ENSMUSG00000003200.10	Sh3gl1	0.0331094	5.815	0.231123	0.633839	1	1071	1257	1290	1275	1109	1356	1379	1290
ENSMUSG00000003206.7	Ebi3	0.0912827	1.9706	0.249119	0.620981	1	68.83	92.44	98.87	99	67.78	109	85	79.66
ENSMUSG00000003208.9	Yju2	-0.0520971	3.44247	0.182743	0.671781	1	195.1	200.06	287.45	249	191	260	258.95	277.17
ENSMUSG00000003226.7	Ranbp2	-0.0844782	6.96176	1.3424	0.25486	1	1919	2326	2531	2825	2666	2966	2998	2939
ENSMUSG00000003227.4	Edar	-0.0559017	0.770896	0.0632262	0.803014	1	27	33	35	43	20	32	44	36
ENSMUSG00000003228.9	Grk5	0.0669346	6.21541	0.0167777	0.898106	1	2266.79	2408.28	2652.76	2579.3	2212.49	2743.48	2441.98	2767.06
ENSMUSG00000003233.12	Dvl3	-0.125254	5.63281	0.482995	0.493855	1	629	1148	1214	1182	1012	1333	1319	1194
ENSMUSG00000003234.16	Abcf3	0.0519928	5.40824	0.732453	0.398211	1	794	895	939	974	885	1001	963	1008
ENSMUSG00000003235.13	Eif2b5	0.069353	5.6088	0.735901	0.397115	1	1046	1009	1094	1087	993	1135	1129	1169
ENSMUSG00000003269.17	Cyth2	0.179158	5.4471	5.99864	0.0197479	0.636719	910.84	977.84	1037.96	1061.95	974.83	1068.94	957.87	985.98
ENSMUSG00000003271.17	Sult2b1	-0.154099	1.06561	0.544751	0.465645	1	43	22	46.35	48	33	48	46	53
ENSMUSG00000003273.14	Car11	-0.191944	0.442182	0.397345	0.53277	1	22	25	28	25	16	44	17	30
ENSMUSG00000003279.17	Dlgap1	0.555621	-1.43235	1.33759	0.255697	1	5	3	12	11	6	5	5	7
ENSMUSG00000003282.9	Plag1	-0.0656046	0.146684	0.0416194	0.83959	1	12	14	21	19	26	17	25	24
ENSMUSG00000003283.14	Hck	-0.569778	5.61455	30.269	4.09934e-06	0.00391706	656	864	795	816	755	1177	1294	1492
ENSMUSG00000003299.10	Mrpl4	0.110635	5.64737	1.85049	0.182873	1	1130	1036	1183	1212	997	1201	1126	1216
ENSMUSG00000003308.15	Keap1	0.0299846	6.09798	0.296454	0.589745	1	1338.68	1510.25	1585.99	1663.15	1436.72	1748.79	1663.44	1651.13
ENSMUSG00000003309.14	Ap1m2	0.191519	4.54363	4.54654	0.0404553	0.814953	511	480	547	574	494	461	525	584
ENSMUSG00000003316.14	Glg1	-0.0692206	7.17437	0.830336	0.368731	1	2295	2785	2812	2979	2595	3146	3478	3056
ENSMUSG00000003341.9	Atp8b3	-1.12767	-2.56822	2.23398	0.144432	1	1	1	1	1	3	4	4	3
ENSMUSG00000003344.14	Btbd2	0.132763	5.62614	3.84259	0.0583852	0.924769	1055	1113	1232	1166	1043	1193	1131	1193
ENSMUSG00000003345.16	Csnk1g2	0.123883	7.10579	2.89752	0.0980442	1	2994	2827	3111	3160	2796	3280	2961	3171
ENSMUSG00000003346.14	Abhd17a	0.266752	5.67142	4.57995	0.040986	0.819729	1278	1042	1151	1112	1162	1155	1024	1127
ENSMUSG00000003348.10	Mob3a	-0.125487	6.05018	1.82339	0.186025	1	1236	1202	1396	1293	1243	1365	1725	1693
ENSMUSG00000003352.14	Cacnb3	-0.163549	4.96705	3.02961	0.0910008	1	551	681	720	720	535	746	914	797
ENSMUSG00000003354.6	Ccdc65	-0.175293	2.81684	1.49008	0.230786	1	157	124	155	163	128	186	190	189
ENSMUSG00000003355.7	Fkbp11	-0.18556	2.22667	1.39701	0.245604	1	84	69	85	97	72	104	107	107
ENSMUSG00000003360.15	Ddx23	0.0355261	6.53498	0.218497	0.643235	1	1478	1977	2357	2235	1875	2283	2111	2213
ENSMUSG00000003363.15	Pld3	0.080515	6.84076	1.13289	0.294824	1	2228	2415	2420	2416	1957	2507	2571	2356
ENSMUSG00000003378.9	Grik5	-0.152636	4.3664	1.7741	0.191928	1	310	422	505	451	372	573	510	480
ENSMUSG00000003379.7	Cd79a	-0.334891	5.63111	2.77358	0.109376	1	595.72	597.37	932	599	782.73	976.09	994.19	1069.75
ENSMUSG00000003380.11	Rabac1	0.268735	7.02838	2.49923	0.126978	1	3402	2508	2878	2826	2681	2823	2460	2947
ENSMUSG00000003382.18	Etv3	-0.208343	6.28583	5.71518	0.0226322	0.671467	1232	1606	1684	1604	1446	1877	2217	1894
ENSMUSG00000003402.14	Prkcsh	0.0300589	6.15632	0.229116	0.635311	1	1388	1584	1673	1794	1352	1745	1747	1735
ENSMUSG00000003410.8	Elavl3	1.68743	-2.7431	1.86765	0.18091	1	0	2	3	0	1	0	0	1
ENSMUSG00000003411.10	Rab3b	-0.0593086	-0.767538	0.0205266	0.88694	1	12	6	13	6	17	12	11	16
ENSMUSG00000003418.11	St8sia6	-0.236818	3.52013	2.65265	0.112812	1	174	204	214	208	140	225	239	296
ENSMUSG00000003420.8	Fcgrt	0.138187	6.60935	2.12055	0.154707	1	2439	2310	2579	2577	2044	2608	2603	2253
ENSMUSG00000003421.13	Nosip	0.0337127	5.47211	0.284543	0.597285	1	840	919	997	1057	876	1028	1012	1103
ENSMUSG00000003423.15	Pih1d1	0.178308	4.60685	2.41114	0.129937	1	591.46	458.91	559.25	583.48	479.43	543.75	565.95	517.71
ENSMUSG00000003429.11	Rps11	0.038792	8.28605	0.0528641	0.820065	1	7394.52	5702.68	5935.54	6170.75	5228.78	6937.73	6717.8	6879.78
ENSMUSG00000003435.9	Supt5	-0.100286	6.92167	1.77987	0.191226	1	1846.67	2603.38	2886.05	2571.26	2217.21	3020.85	2852.19	3010.14
ENSMUSG00000003436.11	Dll3	-0.83697	-3.05538	0.579769	0.452108	1	0	0	0	1	2	0	1	3
ENSMUSG00000003437.14	Paf1	0.0661397	5.97538	0.805994	0.375759	1	1091	1353	1483	1552	1466	1555	1485	1502
ENSMUSG00000003438.17	Timm50	0.128304	4.38274	1.02544	0.318764	1	508	390	461	440	416	466	460	475
ENSMUSG00000003444.8	Med29	0.207223	3.5948	2.28676	0.139924	1	292	265	256	283	214	260	280	242
ENSMUSG00000003452.15	Bicd1	0.201189	2.18481	1.60839	0.213521	1	62	81	91	91	105	89	95	72
ENSMUSG00000003458.12	Ncstn	0.00825918	6.89655	0.0159697	0.900199	1	2102.93	2815.3	2933.86	3021.61	2441	2999.63	2994.48	3056.18
ENSMUSG00000003464.13	Pex19	0.119541	6.22853	3.6657	0.0641755	0.947685	1536	1661	1731	1869	1582	1873	1686	1737
ENSMUSG00000003469.9	Phyhip	0.206904	-0.0859445	0.470269	0.497615	1	12	19	24	20	23	25	17	16
ENSMUSG00000003476.16	Crhr2	-0.193515	-0.82187	0.285652	0.596574	1	9	14	9	17	12	12	8	28
ENSMUSG00000003477.5	Inmt	0.366498	10.3638	4.798	0.0377721	0.798691	31109	29353	34241	30533	32299	32075	22906	29387
ENSMUSG00000003484.4	Cyp4f18	-0.507347	4.27897	9.83032	0.00414742	0.318799	353	370.97	367.99	283	348.94	437	746	507.97
ENSMUSG00000003500.13	Impdh1	0.264259	7.31147	8.95725	0.00517878	0.350122	3429	3883	4181	4009	3564	3918	3222	3767
ENSMUSG00000003505.15	Psg18	0	-3.49827	0	1	1	0	0	0	0	0	0	0	0
ENSMUSG00000003518.13	Dusp3	0.176047	7.76499	4.60781	0.0392097	0.807257	4302.03	4718.25	5585	5536.14	4839.13	5278	4611.3	5270
ENSMUSG00000003526.12	Prodh	-0.096505	4.26554	0.90112	0.349327	1	337	351	419	428	388	421	401	591
ENSMUSG00000003527.9	Ess2	0.106873	4.52138	2.57836	0.117785	1	402	462	560	539	460	532	497	511
ENSMUSG00000003528.15	Slc25a1	0.0792043	5.7186	0.851461	0.362783	1	1092	1069	1242	1166	1106	1230	1197	1270
ENSMUSG00000003531.15	Dgcr6	0.0761003	4.62377	0.464101	0.500428	1	569	462	519	575	507	606	523	594
ENSMUSG00000003534.17	Ddr1	-0.0583084	6.35972	0.686464	0.413275	1	1569	1741	1915	2132	1627	2225.6	2138.21	2038
ENSMUSG00000003541.6	Ier3	0.16237	6.82803	1.49772	0.231591	1	2532	2296	2641	2967	2557	2882	2328	2779
ENSMUSG00000003545.3	Fosb	0.489365	3.0654	2.05008	0.165663	1	128	201	167	316	165	130	97	247
ENSMUSG00000003546.10	Klc4	0.0183789	4.99961	0.0580866	0.811025	1	554	695	739	766	589	840	696	722
ENSMUSG00000003549.9	Ercc1	0.201097	4.0192	4.71582	0.0371152	0.794594	329	330	390.67	365.17	329.59	377	314	352
ENSMUSG00000003555.8	Cyp17a1	-0.668408	-2.38023	0.571644	0.454927	1	1	0	3	0	4	0	4	5
ENSMUSG00000003559.8	As3mt	0.097398	4.58504	1.15901	0.289415	1	526	482	535	559	496	596	533	543
ENSMUSG00000003573.15	Homer3	0.136096	5.51525	3.06347	0.0892893	1	937.33	1066.78	1177.35	1126.23	954	1220.47	1032.49	1030.61
ENSMUSG00000003575.13	Crtc1	-0.16958	4.80762	3.02856	0.0910548	1	430	556	693	577	475	724	672	703
ENSMUSG00000003581.14	Rnf215	0.110969	5.74176	3.25647	0.0802016	1	1028	1172	1308	1269	1114	1297	1140	1306
ENSMUSG00000003585.13	Sec14l2	0.139497	4.27604	1.76847	0.192618	1	466	376	399	414	418	429	392	482
ENSMUSG00000003604.14	Aven	0.28755	3.27218	5.4836	0.0253302	0.698771	212.69	216.2	206.34	260.32	233.76	184.44	204.28	248.19
ENSMUSG00000003617.16	Cp	-0.459763	8.45107	12.7754	0.00127835	0.18461	6651	6592	7463	6541.56	6103	9002.64	11973.6	10600.8
ENSMUSG00000003623.4	Crot	0.0726431	5.15073	1.08488	0.305118	1	624	772	814	882	688	783	867	808
ENSMUSG00000003644.17	Rps6ka1	0.0483766	6.55358	0.463081	0.500897	1	2070	1961	2103	2136	1987	2326.86	2231	2279
ENSMUSG00000003657.9	Calb2	-1.61396	-2.97499	2.36517	0.133528	1	0	1	1	0	0	3	2	0
ENSMUSG00000003660.10	Snrnp200	-0.0893474	7.08262	1.73005	0.197398	1	2145	2521	2985	2804	2566	3045	3293	3146
ENSMUSG00000003662.10	Ciao1	0.177352	5.33393	6.10682	0.0187547	0.623311	847	835	860	1064	873	940	841	941
ENSMUSG00000003665.7	Has1	-0.0341274	0.600025	0.00494368	0.944508	1	11	29	21	59	30	22	31	51
ENSMUSG00000003680.16	Taf6l	0.130423	2.85496	1.15004	0.291259	1	144	153	171	161	164	184	157	157
ENSMUSG00000003721.14	Insig2	0.0988576	5.49321	1.93386	0.17357	1	995	942	1039	1142	943	1170	1026	1053
ENSMUSG00000003731.13	Kpna6	-0.0854139	6.37626	1.72512	0.198022	1	1425	1714	1902	1816	1646	2198	2059	1923
ENSMUSG00000003746.16	Man1a	-0.144588	6.30979	2.69433	0.110128	1	1181	1380	1676.42	1538.01	1495	1684	1899	1923
ENSMUSG00000003752.9	Itpkc	-0.164922	3.83989	2.84765	0.100863	1	224.34	291.79	313.86	284.12	305.48	402.41	329.11	360.68
ENSMUSG00000003762.13	Coq8b	-0.0369746	4.82492	0.226789	0.637028	1	542.6	529.92	670.4	621.93	579.89	715.15	594.25	767.72
ENSMUSG00000003778.14	Brd8	-0.0111977	6.05509	0.0107847	0.917942	1	948	1405	1538	1541	1359	1559	1599	1510
ENSMUSG00000003779.16	Kif20a	0.161699	3.58467	0.262047	0.613669	1	353.98	291.53	281.61	383.29	162.2	218.71	358.47	327.73
ENSMUSG00000003808.18	Farsa	0.0744853	4.95304	0.962523	0.333633	1	585	681	746	692	646	740	672	773
ENSMUSG00000003809.14	Gcdh	0.0635835	4.5274	0.751582	0.392186	1	441	476	480	505	488	542	483	549
ENSMUSG00000003810.12	Mast2	0.0346061	5.89657	0.24313	0.625194	1	1039	1383	1409	1431	1182	1270	1498	1538
ENSMUSG00000003812.13	Dnase2a	-0.0231244	4.94607	0.0789634	0.780447	1	651.62	602.94	678.56	666.08	626.19	757.67	789.3	709.74
ENSMUSG00000003813.15	Rad23a	0.0155755	5.8136	0.0349555	0.852824	1	1160.43	1239.06	1289.88	1222.08	1115.3	1337.48	1298.55	1469.7
ENSMUSG00000003814.8	Calr	0.0412135	9.11499	0.191531	0.664474	1	12273	12527	13198	13049	11261	12374	15721	13549
ENSMUSG00000003824.12	Syce2	0.0421681	1.66319	0.0310483	0.861201	1	80	56	60	72	60	50	93	77
ENSMUSG00000003847.16	Nfat5	-0.0884798	7.3135	0.477877	0.495106	1	2037	3332	3345	3664	3196	3965	3805	3509
ENSMUSG00000003848.14	Nob1	0.0362762	4.33326	0.279148	0.600767	1	386	397	440	453	405	457	470	467
ENSMUSG00000003849.8	Nqo1	-0.588826	2.44923	1.88644	0.183027	1	105	89	83	90	93	285	82	112
ENSMUSG00000003863.18	Ppfia3	0.0116268	-0.143883	0.00167694	0.96758	1	17	8	19	24	16	15	23	19
ENSMUSG00000003865.16	Gys1	-0.275461	5.11209	16.885	0.000243794	0.0750628	556.09	579.25	717.99	762	605.41	918.85	861.86	887.34
ENSMUSG00000003868.14	Ruvbl2	0.0228246	5.21992	0.0842738	0.773389	1	701.91	815.75	865.01	818	781.59	893.15	876.14	923.6
ENSMUSG00000003872.9	Lin7b	0.155767	-1.98561	0.089175	0.794269	1	3	3	3	3.64	2	2	1	6
ENSMUSG00000003873.11	Bax	0.00124179	5.33336	0.000237924	0.987785	1	830.84	794	862	929	794	1025	951	916.64
ENSMUSG00000003882.5	Il7r	-0.415436	5.27807	10.878	0.00258128	0.25977	433	542	586	466	579	671	891	828
ENSMUSG00000003923.14	Tfam	0.0636414	4.86002	0.530438	0.471518	1	618	515	697	656	608	720	603	715
ENSMUSG00000003929.11	Zfp81	-0.0271604	3.7849	0.0783174	0.781323	1	212	301	288	331	267	327	343	304
ENSMUSG00000003934.5	Efnb3	-0.331453	0.742223	1.67881	0.204001	1	17	38	25	41	20	30	40	51
ENSMUSG00000003948.17	Mmd	0.0159659	5.9411	0.0412589	0.840276	1	1111.26	1286.9	1341.9	1475.89	1166.5	1492.91	1349.33	1484.04
ENSMUSG00000003949.16	Hlf	0.456013	4.11676	8.10417	0.0081839	0.433257	340	465	512	660	443	320	405	476
ENSMUSG00000003955.8	Fam162a	0.125145	4.39127	0.54961	0.465117	1	517	414.86	401	449.78	404	471	426	491.8
ENSMUSG00000003970.9	Rpl8	0.0878116	8.82244	0.279813	0.601512	1	10813	8024	9169	9448	8280	9956	9377	10477
ENSMUSG00000003974.6	Grm3	-1.80834	-3.41092	1.67556	0.210069	1	0	0	0	0	0	0	0	1
ENSMUSG00000003992.15	Ssbp2	-0.0759987	3.86584	0.659875	0.422379	1	255.11	259.7	304.88	296.22	287.95	304.52	352.08	360.26
ENSMUSG00000004018.9	Fancl	0.0574755	2.79906	0.228895	0.635474	1	135.81	146.09	131.58	151.33	125.82	133.36	159	164.39
ENSMUSG00000004031.13	Brinp2	0.0820653	-0.967098	0.0456285	0.832156	1	9	4	10	7	10	4	12	10
ENSMUSG00000004032.10	Gstm5	0.145351	2.93842	0.818644	0.372083	1	202.95	151.95	149.82	197.76	145.92	185.84	171.95	171.92
ENSMUSG00000004035.12	Gstm7	0.274002	2.34749	2.68659	0.11062	1	135	112	103	119	106	130	94	105
ENSMUSG00000004038.9	Gstm3	-0.733758	-1.1877	1.90671	0.176536	1	8.08	5.04	9.06	1.01	3.03	12.19	7.16	11.09
ENSMUSG00000004040.16	Stat3	-0.143096	7.92898	3.38402	0.0747694	0.996823	3985	5151	5426	5683	4980	6281	6403	6373
ENSMUSG00000004043.14	Stat5a	-0.273066	4.8461	6.41459	0.0162139	0.581351	437.6	556.82	650.34	620.75	528.29	754.26	854.85	696.45
ENSMUSG00000004044.9	Cavin1	0.138935	9.18769	3.52188	0.0693581	0.975361	11570	12931	14096	15154	12734	14350	12488	14576
ENSMUSG00000004054.9	Map3k11	0.0662357	7.03163	0.942658	0.338601	1	2586.96	2974.97	3288.74	3055.91	2679.79	3296.97	3136.73	3123.77
ENSMUSG00000004056.15	Akt2	0.0520634	7.20697	0.708349	0.406002	1	2961.84	3053.48	3594.27	3560.83	3107.13	3664.24	3476.9	3635.04
ENSMUSG00000004069.17	Dnaja3	0.0329037	5.45855	0.231126	0.633837	1	908.04	954	963	1022	913	1062	1025	1115
ENSMUSG00000004070.15	Hmox2	0.170025	5.63073	2.94442	0.0954744	1	1136.87	1097.86	1032.76	1149.63	984.78	1096.2	1099.35	1116.86
ENSMUSG00000004071.13	Cdip1	0.036563	6.1551	0.293763	0.591431	1	1362.56	1434.66	1581.12	1739.95	1436.89	1763.18	1648.73	1639.54
ENSMUSG00000004085.14	Map3k20	-0.0514436	6.1516	0.338543	0.564593	1	1060	1482	1532	1768	1464	1729	1690	1749
ENSMUSG00000004096.9	Cwc15	0.136364	5.62793	1.57361	0.218733	1	1145	946	1045	1139	1045	1121	1069	1152
ENSMUSG00000004098.7	Col5a3	-0.296221	3.67716	1.3876	0.250594	1	170	306	352	295	245	368	407	368
ENSMUSG00000004099.16	Dnmt1	-0.108226	6.08137	0.787143	0.382368	1	972	1413	1564	1549	1200	1463	1738	1721
ENSMUSG00000004100.12	Ppan	-0.123968	4.53573	1.74657	0.195325	1	360.09	472	499.26	507	436	573	595	527
ENSMUSG00000004105.8	Angptl2	0.0237655	6.69984	0.0413438	0.840274	1	1721	2277	2557	2397	2232	3026	2064	2440
ENSMUSG00000004110.17	Cacna1e	-0.609656	2.51967	5.99632	0.0207244	0.647668	34	60	76	74	74	115	103	113
ENSMUSG00000004113.18	Cacna1b	0.0594057	0.695788	0.0509185	0.822853	1	36	40	25	44	29	27	39	49
ENSMUSG00000004127.12	Trmt10a	-0.0502616	2.47005	0.177956	0.67585	1	98	102	113	124	110.58	137	134.88	117
ENSMUSG00000004151.17	Etv1	0.139325	4.10495	0.940096	0.339886	1	291.2	330.42	387.12	437.46	379.44	301.57	370.63	463.16
ENSMUSG00000004187.11	Kifc2	0.126538	4.13543	0.520674	0.476936	1	246.89	398.18	442.95	436.63	347.07	418.21	358.81	391.07
ENSMUSG00000004207.14	Psap	-0.124197	10.5125	2.14018	0.15287	1	24803	30678	31356	30535	25401	33937	39569	33071
ENSMUSG00000004221.16	Ikbkg	-0.110984	5.79657	2.72292	0.108328	1	986	1062	1168	1270	1069.75	1513	1272.84	1329
ENSMUSG00000004231.15	Pax2	0	-3.47589	0	1	1	0	0	0	0	0	0	0	0
ENSMUSG00000004233.14	Wars2	-0.045112	3.35399	0.15678	0.694666	1	154	245	219	207	172	226	214	265
ENSMUSG00000004263.15	Atn1	0.00468321	6.69749	0.000846875	0.977021	1	1429.44	2548.94	2461.17	2606	2129	2701.26	2409.83	2473.16
ENSMUSG00000004264.17	Phb2	0.137131	6.02886	2.29906	0.138897	1	1490.46	1369.49	1425	1524	1315.85	1519	1492.87	1454
ENSMUSG00000004266.15	Ptpn6	-0.0673162	6.22148	0.622333	0.435768	1	1348.69	1485.62	1627.58	1574.66	1475.79	1616.56	1866.67	1924.66
ENSMUSG00000004267.16	Eno2	-0.332561	2.44996	3.92063	0.0560175	0.913102	62	119	113	123	86	136	155	140
ENSMUSG00000004268.11	Emg1	0.0170185	5.65501	0.0448592	0.833555	1	1069.78	988.09	1066.07	1089.29	958.99	1172.29	1161.03	1189.67
ENSMUSG00000004270.13	Lpcat3	-0.0551543	5.80909	0.496057	0.486139	1	1236.22	1146.91	1273.93	1193.71	1067.01	1458.71	1405.97	1373.33
ENSMUSG00000004285.12	Atp6v1f	0.0263916	5.88075	0.0342552	0.854602	1	1367.87	1166.97	1214.99	1234.97	1091.98	1433.97	1350.89	1338.96
ENSMUSG00000004296.14	Il12b	-0.375301	0.667683	1.61596	0.212473	1	32	29	30	34	25	39	45	50
ENSMUSG00000004317.14	Clcn5	-0.0177982	3.92658	0.0347434	0.853266	1	282	337	300	362	263	337	413	321
ENSMUSG00000004319.15	Clcn3	-0.147827	5.94774	5.37614	0.0266995	0.712086	1001	1096	1242	1355	1154.01	1409	1470	1561
ENSMUSG00000004328.15	Hif3a	0.703377	2.22831	3.65547	0.0679158	0.966605	161	81	97	136	192	88	95	102
ENSMUSG00000004341.8	Gpx6	-0.359118	-3.41053	0.0563673	0.814716	1	1	0	0	0	0	0	1	0
ENSMUSG00000004344.12	Gpx5	0	-3.49827	0	1	1	0	0	0	0	0	0	0	0
ENSMUSG00000004347.17	Pde1c	-0.199866	0.47579	0.671671	0.418303	1	25	22	35	25	20	32	39	29
ENSMUSG00000004356.8	Utp20	-0.157957	4.31715	2.77424	0.105182	1	268	381	408	437	391	428	532	476
ENSMUSG00000004359.16	Spic	-0.601722	0.0254782	4.69465	0.037516	0.796618	6	15	10	14	23	21	26	24
ENSMUSG00000004360.9	9330159F19Rik	0.146644	1.90729	0.707718	0.406209	1	74	73	79	71	77	66	78	89
ENSMUSG00000004364.14	Cul3	-0.0177209	6.71963	0.102473	0.750884	1	1838	2209	2255	2484	2205	2491	2525	2612
ENSMUSG00000004366.4	Sst	0	-3.47601	0	1	1	0	0	0	0	0	0	0	0
ENSMUSG00000004371.15	Il11	0.39272	-0.414441	1.45271	0.236597	1	10	22	13	19	13	9	17	14
ENSMUSG00000004383.18	Large1	0.0320259	4.71745	0.174179	0.679106	1	504	555	645	566	499	617	614	628
ENSMUSG00000004393.10	Ddx56	0.030052	4.58134	0.0962474	0.758315	1	520	442	591	521	441	601	519	575
ENSMUSG00000004394.12	Tmed4	0.0346018	6.33468	0.181549	0.672789	1	1828	1687	1703	1910	1639	2097	1772	2036
ENSMUSG00000004415.15	Col26a1	-0.0973421	-0.239649	0.123911	0.727051	1	17	18	20	17	15	21	21	22
ENSMUSG00000004446.12	Bid	-0.103923	3.73595	0.734522	0.397553	1	228.82	252.71	285.55	260.34	260.32	306.84	311.39	332.88
ENSMUSG00000004451.14	Ralb	-0.0303943	6.36306	0.0912826	0.764434	1	1714	1770	1896	1912	1540	2143	2108	1945
ENSMUSG00000004455.16	Ppp1cc	0.068304	7.34817	0.971072	0.331526	1	3320.58	3368.63	3444.54	3838.5	3343.04	3918.48	3611.73	3832.2
ENSMUSG00000004460.17	Dnajb11	0.0462685	6.38673	0.243475	0.624949	1	1754	1807	1953	1811	1695	1816	2143	2054
ENSMUSG00000004462.7	Tbccd1	0.0326859	4.12095	0.185955	0.669086	1	314	352	374	369	367	398	398	397
ENSMUSG00000004473.10	Clec11a	0.111781	4.12044	0.513265	0.479613	1	493	496	393	371	336	436	457	447
ENSMUSG00000004500.9	Zfp324	0.019259	3.67336	0.0408365	0.841085	1	221	290	263	257	261	284	308	284
ENSMUSG00000004508.6	Gab2	0.140571	5.91463	3.79664	0.0598311	0.932119	1199	1340	1436	1594	1377	1489	1367	1465
ENSMUSG00000004530.12	Coro1c	0.095937	7.44375	2.15981	0.151056	1	3769.6	3814.8	4214.56	4357.42	3595.95	4357	4188	4149.96
ENSMUSG00000004535.12	Tax1bp1	0.150298	7.81012	6.72865	0.0140012	0.548771	4249.64	5242.51	5613.52	5632.2	5066.62	5344.36	5315.79	5267.22
ENSMUSG00000004540.7	Psg17	-0.0602471	-0.620916	0.0343911	0.854003	1	10	17	10	11	12	14	18	11
ENSMUSG00000004542.15	Psg19	-0.789328	-2.74331	0.709604	0.405776	1	0	2	1	1	0	1	3	1
ENSMUSG00000004552.16	Ctse	-0.52236	1.59506	5.10346	0.0305515	0.744262	30	53	36	20	50	67	59	62
ENSMUSG00000004558.15	Ndrg2	0.456334	6.21005	13.8334	0.000862544	0.152239	1764	1801	2076	2106	1972	1815	1334	1722
ENSMUSG00000004561.14	Mettl17	-0.0608783	4.08591	0.315677	0.577983	1	273	375	356	374	360	440	360	444
ENSMUSG00000004562.16	Arhgef40	0.0648797	5.85781	0.295134	0.591059	1	863.03	1427.08	1544.24	1536.08	1086.07	1445.05	1397.15	1353.88
ENSMUSG00000004565.15	Pnpla6	-0.0772074	5.70327	0.432865	0.515632	1	704	1085	1190	1200	952	1286	1211	1190
ENSMUSG00000004567.16	Mcoln1	0.068944	5.62918	0.810588	0.374418	1	807	1074	1233	1242	1023	1228	1109	1164
ENSMUSG00000004568.13	Arhgef18	-0.0189872	6.88165	0.0496644	0.825011	1	1763	2419	2842	2658	2515	2851	2694	2899
ENSMUSG00000004591.16	Pkn2	0.00505959	6.21642	0.00750341	0.931491	1	1262	1539	1584	1771	1509	1726	1763	1741
ENSMUSG00000004609.11	Cd33	-0.0153211	4.61511	0.00858215	0.92691	1	384	544	578	559	704	551	560	812
ENSMUSG00000004610.4	Etfb	0.159825	5.87584	2.37816	0.132502	1	1360.32	1201.03	1348.15	1482	1146.13	1461.26	1228	1338.73
ENSMUSG00000004612.9	Nkg7	-0.166114	4.21377	0.606636	0.443697	1	317	304	291	291	218	338	335	428
ENSMUSG00000004626.14	Stxbp2	0.0130744	6.14483	0.0515488	0.821779	1	1214	1463	1553	1662	1423	1692	1611	1662
ENSMUSG00000004630.18	Pcp2	-1.21926	-2.9916	1.04546	0.315225	1	0	3.29	0	0	0	3.08	0	2.73
ENSMUSG00000004631.15	Sgce	0.141048	5.75376	2.8463	0.10094	1	1192	1202	1274	1400	1158	1261	1301	1318
ENSMUSG00000004633.17	Chn2	-0.0977998	3.4786	0.573256	0.454297	1	224.92	225.89	219.61	278.9	190.89	296.66	254.85	286.5
ENSMUSG00000004637.15	Wwox	-0.105583	3.33243	0.92379	0.343416	1	201	202	212	208	210	259	240	267
ENSMUSG00000004642.13	Slbp	-0.0940336	5.17138	0.816828	0.372607	1	630.17	726	741.59	827.98	644	788	933.68	889
ENSMUSG00000004651.6	Tyr	0	-3.34872	0	1	1	0	0	0	0	0	0	0	0
ENSMUSG00000004654.6	Ghrhr	0.330063	-3.15888	0.0548908	0.816289	1	0	0	1	1	0	1	0	0
ENSMUSG00000004655.5	Aqp1	0.147687	9.80925	2.5643	0.118755	1	19734	20457	22972	22995	19178	23682	18369	23314
ENSMUSG00000004661.15	Arid3b	-0.0311409	4.79535	0.0961019	0.758492	1	382	572.7	619	597	514.86	618.39	668.31	585.52
ENSMUSG00000004665.10	Cnn2	0.053332	8.61235	0.171834	0.681551	1	8455	7746	8018	8768	7221	8084	9105	9531
ENSMUSG00000004667.18	Polr2e	0.165074	5.86076	2.28456	0.140561	1	1328	1198	1316	1205	1205	1333	1234	1285
ENSMUSG00000004668.14	Abca13	0.0339086	-1.03404	0.00733826	0.932247	1	9	6	9	6	13	10	10	9
ENSMUSG00000004677.17	Myo9b	-0.172313	6.82469	3.29873	0.0783542	1	1551	2162	2511	2266	2141	2681	2795	2707
ENSMUSG00000004698.10	Hdac9	-0.384084	3.44875	9.5389	0.00404266	0.316023	142	217	195	213	159	279	285	262
ENSMUSG00000004707.14	Ly9	-0.272136	4.21038	5.68941	0.0229164	0.676278	244	324	337	277	293	385	458	379
ENSMUSG00000004709.14	Cd244a	-0.351767	3.32607	5.95772	0.0201384	0.640744	134	245	223	244	209	323	314	281
ENSMUSG00000004730.15	Adgre1	-0.0834578	5.26234	0.55015	0.463749	1	851	1078	1049	897	766	1111	1223	1042
ENSMUSG00000004748.5	Mtfp1	0.247733	2.05143	2.29836	0.138956	1	98	100	67	102	120	94	86	104
ENSMUSG00000004768.14	Rab23	-0.0979009	4.64003	1.89397	0.177948	1	422	483	575	556	453	631	569	624
ENSMUSG00000004771.12	Rab11a	0.242805	6.76043	8.42841	0.00651282	0.392334	2541.35	2297.88	2445.23	2838.71	2585.51	2451	2288	2665.81
ENSMUSG00000004788.11	Eif2b2	0.115903	5.01731	1.58414	0.216926	1	739	663	710	728	643	702	744	771
ENSMUSG00000004789.10	Dlst	0.0552967	6.91724	1.12645	0.296177	1	2312.03	2509	2808	3052	2538	2876	2845	2999
ENSMUSG00000004791.7	Pgf	0.326272	2.58199	3.75207	0.061272	0.939055	145	125	129	188	165	148	143	121
ENSMUSG00000004798.14	Ulk2	0.197623	6.30778	8.27745	0.00695828	0.408511	1588	1735	1866	1899	1716	1827	1591	1858
ENSMUSG00000004814.10	Ccl24	-2.01896	2.49536	3.22176	0.0863002	1	106	31	49	24	19	13	546	89
ENSMUSG00000004815.12	Dgkq	-0.197808	4.79136	1.20219	0.283603	1	311.87	625.35	592.46	611.06	529.7	681.26	755.73	647
ENSMUSG00000004821.1	Tmed11	0	-3.49827	0	1	1	0	0	0	0	0	0	0	0
ENSMUSG00000004837.2	Grap	0.103702	6.74774	1.69489	0.2019	1	2316	2154	2429	2572	2156	2652	2288	2506
ENSMUSG00000004842.18	Pou1f1	-0.515271	-2.21328	0.482246	0.492228	1	3	3	1	3	0	5	2	3
ENSMUSG00000004843.7	Chmp2b	0.157409	5.96262	5.15763	0.0297405	0.737471	1295	1221	1385	1555	1322	1357	1361	1459
ENSMUSG00000004846.10	Plod3	0.0596715	6.39349	1.0477	0.313423	1	1638.69	2012.67	2060.38	2068.97	1774.43	2086.23	2159.23	2038.13
ENSMUSG00000004849.14	Ap1s1	0.140584	5.53698	1.51167	0.228195	1	1125	961	1095	1035	857	1044	1039	1093
ENSMUSG00000004864.13	Mapk13	-0.116115	3.66499	0.800686	0.377317	1	282	286	267	254	241	318	349	328
ENSMUSG00000004865.16	Srpk1	-0.14032	6.14319	2.3259	0.136688	1	1046	1378	1550	1431	1365	1664	1737	1705
ENSMUSG00000004872.15	Pax3	-0.372614	-3.38969	0.0678759	0.796961	1	0	0	1	0	0	0	1	0
ENSMUSG00000004880.11	Lbr	-0.182914	6.28769	6.94092	0.012692	0.525714	1227.86	1581.93	1732.76	1664.71	1444.77	1943.44	1970.04	2031.45
ENSMUSG00000004885.5	Crabp2	-0.121833	-2.64086	0.014063	0.907598	1	1	0	0	3	0	2	1	0
ENSMUSG00000004891.16	Nes	0.0628525	7.54176	0.336842	0.565703	1	2818	4072	4723	4166	4162	4315	4596	4123
ENSMUSG00000004892.13	Bcan	-0.0942838	2.74532	0.194324	0.662541	1	104	147	148	179	88	218	128	138
ENSMUSG00000004894.10	Hapln2	0.415081	-2.65268	0.148925	0.702022	1	1	1	2	0	2	1	1	1
ENSMUSG00000004895.9	Prcc	0.0612182	5.14324	0.622662	0.435648	1	732	755	854	763	670	842	829	816
ENSMUSG00000004896.16	Rrnad1	-0.0402791	5.19498	0.0957799	0.759217	1	473.41	801.38	783.2	988.92	758.75	932.67	848.07	881.28
ENSMUSG00000004897.16	Hdgf	0.148627	7.33133	3.20979	0.0822999	1	3607	3417	3497	3981	3414	3775	3607	3751
ENSMUSG00000004902.7	Slc25a18	-0.0283844	0.423129	0.0144374	0.905083	1	24	22	25	34	29	29	21	44
ENSMUSG00000004929.12	Thop1	0.0238299	4.19523	0.071635	0.790623	1	401	347	400	432	351	435	401	472
ENSMUSG00000004931.11	Apba3	0.189397	4.8263	5.64551	0.0234094	0.67852	613	648	698	661	597	656	643	641
ENSMUSG00000004933.17	Matk	-0.509888	3.10336	3.59227	0.0698949	0.977962	102	112	151	111	91	139	260	153
ENSMUSG00000004934.14	Pias4	0.0345514	4.50989	0.209362	0.650242	1	458	482	476	533	511	574	520	559
ENSMUSG00000004936.8	Map2k1	0.0539236	6.24158	0.908352	0.347426	1	1478	1633	1720	1758	1637	1759	1906	1777
ENSMUSG00000004937.6	Sgta	0.0927997	6.1147	2.33883	0.135638	1	1444	1516	1621	1777	1425	1738	1608	1663
ENSMUSG00000004939.7	Nmrk2	-0.0264138	-2.75752	0.000703728	0.978995	1	1	4	3	1	1	4	0	3
ENSMUSG00000004945.15	Tmem242	0.127617	4.98612	0.612194	0.441252	1	847	619	651	670	589	708	709	726
ENSMUSG00000004947.15	Dtx2	-0.146953	4.40661	3.57105	0.0675351	0.963607	395	419	495	436	377	541	571	500
ENSMUSG00000004948.12	Zp3	-0.521931	-2.82623	0.380097	0.541748	1	0	1	2	2	2	2	4	1
ENSMUSG00000004951.10	Hspb1	0.34332	6.24072	6.10591	0.0202624	0.641693	2006.15	1717.09	1670.03	2119.19	2022.29	1914.5	1717.55	1555.73
ENSMUSG00000004952.13	Rasa4	-0.272665	4.71434	4.23601	0.048532	0.869687	407.95	513	555	532	454	599	723	715
ENSMUSG00000004961.7	Syt5	-0.0194313	3.22036	0.0142034	0.905851	1	185	151	195	193	190	196	184	259
ENSMUSG00000004980.16	Hnrnpa2b1	-0.0240711	9.07585	0.0632538	0.802972	1	8025	10952	11918	13533	10727	11873	13185	13173
ENSMUSG00000004988.9	Fxyd4	-1.08254	0.309508	3.35216	0.0797187	1	23	12	9	24	12	8	69	40
ENSMUSG00000004994.12	Ccdc130	-0.0580322	3.47373	0.420044	0.521363	1	177	215	233	253	243	273	247	280
ENSMUSG00000004996.9	Mri1	-0.0226192	4.00163	0.0626376	0.803914	1	266	313	323	355	355	355	376	393
ENSMUSG00000005034.15	Prkacb	-0.0217712	6.78301	0.109882	0.742358	1	1798	2091	2357	2519	2377	2478	2630	2640
ENSMUSG00000005043.13	Sgsh	0.0416847	5.54933	0.278438	0.601229	1	811.75	939.55	1105.85	1095.59	925.17	1154.54	1015.58	1073.8
ENSMUSG00000005045.16	Chd5	0.420602	1.52591	4.54507	0.0404858	0.814953	40	55	78	78	75	58	49	59
ENSMUSG00000005054.7	Cstb	-0.0374963	5.32676	0.0455213	0.832853	1	1014	707	731	810	681	847	1009	951
ENSMUSG00000005057.13	Sh2b2	-0.172663	2.8434	1.47316	0.233394	1	131	152	144	131	156	191	211	152
ENSMUSG00000005069.12	Pex5	0.0268555	5.24776	0.126833	0.723988	1	639	819	884	996	827	950	932	911
ENSMUSG00000005078.16	Jkamp	0.146522	4.70488	2.42321	0.129013	1	601	553	558	606	570	624	552	625
ENSMUSG00000005087.17	Cd44	-0.127336	7.57738	2.36984	0.133158	1	2984	3947	4318	4199	3504	4367	5000	4780
ENSMUSG00000005089.15	Slc1a2	0.0445853	2.15779	0.0645279	0.801041	1	82	107	78	95	77	94	91	108
ENSMUSG00000005102.13	Eif2ak4	-0.163956	4.39451	2.49634	0.123573	1	317	404	470	438	399	545	557	451
ENSMUSG00000005103.12	Wdr1	-0.0750585	7.66879	1.32662	0.257618	1	3864.02	4247	4594	4501	3969	4833	5451	5028
ENSMUSG00000005107.13	Slc2a9	-0.0749095	3.14893	0.435072	0.514051	1	165	172	188	203	167	247	195	205
ENSMUSG00000005124.10	Ccn4	-0.032985	3.20078	0.0252374	0.874932	1	147	213	195	224	166	307	204	149
ENSMUSG00000005125.13	Ndrg1	0.0694065	5.48699	0.643709	0.428065	1	776	972	1176	1181	903	992	989	1280
ENSMUSG00000005131.4	4930550C14Rik	-0.0610424	1.18056	0.0979086	0.756307	1	32	40	53	40	42	55	43	50
ENSMUSG00000005142.10	Man2b1	-0.144868	7.34351	2.79683	0.103832	1	2730	3642	3930	3673	2927	4204	4662	3898
ENSMUSG00000005148.8	Klf5	-0.0587821	5.27058	0.611718	0.439673	1	625	860	807	953	815	935	927	1033
ENSMUSG00000005150.16	Wdr83	0.0338459	4.2018	0.181293	0.673006	1	349.36	392.39	397.62	418.44	385.36	453.15	403.19	448.26
ENSMUSG00000005161.15	Prdx2	0.0836987	6.79154	0.611026	0.440171	1	2579.3	2280.73	2467.23	2544.54	2249.71	2627.49	2604.17	2660.82
ENSMUSG00000005198.15	Polr2a	-0.262372	7.69205	2.05379	0.164989	1	2305	4150	4864	4230	3518	5085	5257	5192
ENSMUSG00000005202.2	Shbg	0	-3.49827	0	1	1	0	0	0	0	0	0	0	0
ENSMUSG00000005204.12	Senp3	0.0972202	6.12093	2.83767	0.101438	1	1248.89	1570	1683.9	1620.99	1432.95	1578.94	1642.96	1616.86
ENSMUSG00000005220.10	Corin	-0.114428	1.94595	0.101079	0.753228	1	65	63	107	125	80	104	136	83
ENSMUSG00000005225.15	Plekha8	-0.157983	4.25263	4.06838	0.0518218	0.890468	359.23	375.25	379.26	395.33	366.43	489.52	480.62	469.64
ENSMUSG00000005232.11	G6pc2	0.403261	-3.25008	0.109533	0.743117	1	2	1	1	0	0	0	1	1
ENSMUSG00000005233.16	Spc25	0.072975	2.67378	0.0959191	0.759079	1	158	126	136	192	97	125	189	148
ENSMUSG00000005237.14	Dnah2	-0.235522	3.78409	3.4329	0.0727983	0.98767	181.39	223	307.42	246.2	287.87	343	330.37	330.95
ENSMUSG00000005251.15	Ripk4	0.0621903	4.93144	0.488446	0.489479	1	624	592	729	697	610	686	660	796
ENSMUSG00000005262.13	Ufd1	0.02413	5.51059	0.17657	0.677039	1	861	931	1000	1100	962	1172	1019	1085
ENSMUSG00000005267.13	Zfp287	-0.0462864	3.11283	0.129899	0.720815	1	114	174	185	152	164	186	187	185
ENSMUSG00000005268.20	Prlr	-0.352325	-0.492199	0.698332	0.409307	1	5	8	6	12	9	13	13	9
ENSMUSG00000005299.6	Letm1	0.0726503	5.7812	0.929773	0.341879	1	1167	1081	1268	1226	1104	1257	1318	1250
ENSMUSG00000005312.15	Ubqln1	0.0788633	6.98721	1.87765	0.179778	1	2407	2684	2780	3144	2677	2986	2897	3010
ENSMUSG00000005320.9	Fgfr4	0.27183	5.26724	3.9169	0.0579739	0.923799	622	966	1075	1096	656	824	751	912
ENSMUSG00000005338.13	Cadm3	-0.318953	1.77469	1.63963	0.209238	1	43.12	55	57	62	47	52.84	72	101.14
ENSMUSG00000005339.10	Fcer1a	-0.692676	-1.44741	1.21508	0.278361	1	3	4	5	2	9	0	6	20
ENSMUSG00000005354.16	Txn2	0.0487513	6.19292	0.21671	0.644661	1	1635	1538	1541	1722	1495	1682	1817	1786
ENSMUSG00000005355.9	Casp14	-0.375355	-3.43222	0.067352	0.797985	1	0	0	0	1	0	0	1	0
ENSMUSG00000005357.9	Slc1a6	-0.346868	-2.0477	0.343403	0.561826	1	4	3	1	6	3	5	2	8
ENSMUSG00000005360.14	Slc1a3	0.0680068	5.4232	0.534758	0.469733	1	673	1011	1054	1041	892	1078	995	969
ENSMUSG00000005362.14	Crbn	0.0771109	4.95827	1.31617	0.259464	1	622.05	645	687.81	721.69	628.68	666.72	715.4	771.93
ENSMUSG00000005364.11	Il5ra	-0.452869	0.872477	2.54093	0.120387	1	29	26	50	25	25	36	80	29
ENSMUSG00000005370.4	Msh6	-0.220985	4.89286	7.69494	0.00901068	0.451928	437	581	636	613	537	719	781	735
ENSMUSG00000005371.15	Fbxo11	-0.000742473	6.48763	7.49164e-05	0.993146	1	1415	1895	1972	2239	2029	2266	2098	2168
ENSMUSG00000005373.13	Mlxipl	0.166926	2.00319	0.368179	0.548703	1	30	78.08	110.11	97.17	93.57	95	68.8	83
ENSMUSG00000005374.13	Tbl2	0.00474685	4.93369	0.00400498	0.949918	1	571	612	694	671	557	710	724	689
ENSMUSG00000005378.17	Bud23	-0.0273887	4.48306	0.0949822	0.759858	1	495.4	444.99	464.46	453.12	401.28	527.49	537.59	524.16
ENSMUSG00000005397.8	Nid1	0.00990951	7.55067	0.00613178	0.938137	1	3070.93	4619.88	4566.92	4761.99	3768	5257	4893.99	3921.96
ENSMUSG00000005410.6	Mcm5	-0.161256	4.5922	0.550293	0.465633	1	493	486	491	481	339	468	665	630
ENSMUSG00000005413.8	Hmox1	-0.19805	5.35891	2.66856	0.11305	1	800	793	898	898	810	1175	1269	861
ENSMUSG00000005417.17	Mprip	0.0191294	9.29786	0.0955475	0.759167	1	11095.2	13298.9	14370	14335.7	12710.8	14968.2	14597.1	14945
ENSMUSG00000005442.13	Cic	-0.0864204	7.3973	0.334035	0.568394	1	2264	3868	4577	3831	3054	4086	4365	4245
ENSMUSG00000005447.12	Pafah1b3	0.208953	3.63374	2.66882	0.111761	1	279	272	245	282	252	245	233	317
ENSMUSG00000005465.9	Il27ra	-0.42618	4.27291	12.747	0.0011099	0.17182	206	285	329	279	283	389	419	464
ENSMUSG00000005469.10	Prkaca	0.118718	6.20988	3.67606	0.0638193	0.946837	1617	1705	1665	1779	1551	1733	1717	1824
ENSMUSG00000005470.8	Asf1b	0.0121658	3.02315	0.00197961	0.964873	1	197	187	174	154	124	153	219	201
ENSMUSG00000005474.9	Myl10	-2.58842	-3.15867	3.53664	0.0703662	0.979105	0	0	0	0	0	0	1	1
ENSMUSG00000005481.18	Ddx39	0.127879	5.76875	3.39452	0.074341	0.994727	1040.02	1194.88	1329.81	1327.55	1147.75	1336.45	1167.01	1286.7
ENSMUSG00000005483.10	Dnajb1	-0.322061	5.64063	8.36729	0.0069169	0.406513	829	1010	927	1013	782	1202	1431	1278
ENSMUSG00000005493.15	Msh4	0	-3.34831	0	1	1	0	0	0	0	0	0	0	0
ENSMUSG00000005501.14	Usp40	-0.0578867	5.01771	0.363932	0.550421	1	517	710	693	746	660	836	793	740
ENSMUSG00000005503.8	Evx1	0	-3.49827	0	1	1	0	0	0	0	0	0	0	0
ENSMUSG00000005505.12	Kbtbd4	-0.0655873	4.36863	0.643187	0.428251	1	364.5	419.26	471.83	441.96	365.36	470.58	518.17	490.83
ENSMUSG00000005506.16	Celf1	-0.0460888	6.93554	0.283588	0.597898	1	1675	2420	2447	2817	2436	2764	2714	2836
ENSMUSG00000005510.9	Ndufs3	-0.0775601	5.31789	0.614304	0.438717	1	892.15	750.71	832.81	906.29	759.62	1006.21	989.94	1017.21
ENSMUSG00000005514.14	Por	0.196307	8.00578	4.33864	0.0450183	0.851522	6045	5338	7053	6077	5907	5836	5566	6899
ENSMUSG00000005533.10	Igf1r	0.0791158	6.54635	0.942072	0.33875	1	1636	1963	2283	2423	1942	2283	2032	2316
ENSMUSG00000005534.10	Insr	-0.00152388	6.27707	0.000397469	0.984213	1	1159	1637	1720	1808	1631	1928	1714	1800
ENSMUSG00000005540.10	Fcer2a	-0.853495	4.71883	13.0001	0.00150674	0.202682	259	335	444	352	371	518	1004	650
ENSMUSG00000005547.14	Cyp2a5	0.0965715	4.87905	0.0439759	0.835812	1	322	168	591	1093	771.86	971	401.86	484.69
ENSMUSG00000005553.14	Atp4a	1.69636	-3.08868	1.82389	0.186246	1	0	3	1	0	2	0	0	1
ENSMUSG00000005566.14	Trim28	0.0981277	6.79236	2.63472	0.11399	1	2055	2406	2682	2780	2463	2594	2640	2692
ENSMUSG00000005575.16	Ube2m	0.0719766	5.56846	0.660222	0.422258	1	1037	1008	971	1146	993	1200	1089	1089
ENSMUSG00000005580.11	Adcy9	-0.412332	4.46915	7.08432	0.0129197	0.532357	252	382	389	426	321	527	567	512
ENSMUSG00000005583.16	Mef2c	-0.204095	5.47076	7.85968	0.0083711	0.439324	601	784	841	903	686	909	1020	1074
ENSMUSG00000005609.16	Ctr9	-0.137209	5.56763	3.75539	0.0611633	0.939055	740	921	1031	971	905	1195	1158	1087
ENSMUSG00000005610.17	Eif4g2	0.0561265	9.5275	0.828022	0.369391	1	14272	15576	16353.5	17016.1	15061.3	17338	16987.3	17398
ENSMUSG00000005611.15	Mrvi1	-0.134478	3.79663	1.11048	0.299572	1	278	320	343	320	250	289	461	387
ENSMUSG00000005615.15	Pcyt1a	0.0869518	6.86109	1.90891	0.176293	1	2153.83	2364.78	2483.4	2712.52	2412.05	2728.09	2509.87	2599.89
ENSMUSG00000005621.11	Zfp592	-0.144344	6.3353	4.19818	0.0484219	0.869621	1248	1605	1801	1618	1586	2048	1927	1975
ENSMUSG00000005625.15	Psmd4	0.080052	6.40343	1.11332	0.298965	1	1804	1706	1858	1916	1899	1989	1901	2100
ENSMUSG00000005628.12	Tmod4	-0.333413	0.0701493	1.79025	0.18997	1	18	19	17	16	24	32	18	32
ENSMUSG00000005640.11	Insrr	-0.536961	-0.621821	1.65295	0.207436	1	6	14	4	11	9	7	19	18
ENSMUSG00000005649.17	Cabp5	0.819467	-3.28862	0.359979	0.553472	1	0	2	0	0	1	0	0	1
ENSMUSG00000005656.9	Snx6	-0.0215459	5.86563	0.0677777	0.796205	1	1156	1266	1225	1362	1053	1356	1529	1339
ENSMUSG00000005667.8	Mthfd2	-0.322256	3.45311	2.44495	0.129818	1	225	215	208	204	189	232	361	305
ENSMUSG00000005672.12	Kit	0.0313937	7.62403	0.0451045	0.833491	1	3129	4915	4999	5061	4284	5711	5030	4185
ENSMUSG00000005674.9	Tomm40l	0.133754	4.80142	2.00974	0.16559	1	633.23	569.99	701.15	631.37	566.27	731.09	579.9	635.95
ENSMUSG00000005677.14	Nr1i3	0.0611764	1.45829	0.104219	0.748845	1	46.77	59.01	60.85	62.63	59.73	56.91	61.1	72.05
ENSMUSG00000005681.12	Apoa2	-0.158127	-2.16755	0.0592467	0.809185	1	3	2	3	3	2	5	3	2
ENSMUSG00000005682.9	Pan2	-0.0847874	5.83111	0.34609	0.561448	1	759	1189	1283	1244	1177	1465	1300	1326
ENSMUSG00000005683.8	Cs	-0.00141698	7.35724	0.000615639	0.980353	1	3326.99	3582	3746	3916	3295	3942	4081.99	4263
ENSMUSG00000005686.17	Ampd3	-0.00479491	5.37731	0.00261197	0.959546	1	799.82	918.63	1049.6	970.33	1031.13	1112.4	923.23	1255.03
ENSMUSG00000005687.14	Bcas2	0.072737	5.39277	1.36388	0.251168	1	748	840	917	1065	905	1015	903	997
ENSMUSG00000005696.11	Sh2d1a	-0.367937	1.50968	2.87932	0.0990622	1	22	32	50	36	38	49	50	58
ENSMUSG00000005698.15	Ctcf	-0.0725338	6.52628	1.37995	0.248449	1	1413.68	1824.59	2047.23	1952	1859.15	2114	2187.56	2246.54
ENSMUSG00000005699.16	Pard6a	-0.0415496	2.4934	0.0851379	0.772263	1	119	93	114	134	97	130	135	129
ENSMUSG00000005705.10	Agrp	-0.85797	-0.45816	6.14202	0.0184433	0.617984	6	7	10	10	11	21	14	20
ENSMUSG00000005716.16	Pvalb	-1.21784	-1.68093	4.20004	0.0483749	0.869621	4	3	1	0	4	2	4	14
ENSMUSG00000005718.8	Tfap4	0.243765	2.60519	2.8469	0.100906	1	144	125	147	177	171	173	119	152
ENSMUSG00000005732.14	Ranbp1	0.0710885	5.05368	0.324306	0.57329	1	764	638	707	694	631	663	734	863
ENSMUSG00000005763.15	Cd247	-0.316576	4.38059	6.59619	0.0148919	0.564517	305.53	315.84	330.65	303.89	306.02	420.49	480.09	438.98
ENSMUSG00000005774.12	Rfx5	-0.0632477	5.18918	0.43463	0.514264	1	543.86	758.37	833.78	825.5	652.8	815.39	899.59	862.4
ENSMUSG00000005779.12	Psmb4	0.0802829	6.36466	0.354143	0.556805	1	2070	1574	1712	1788	1662	1874	1939	1956
ENSMUSG00000005800.3	Mmp8	0.264696	2.74796	0.791893	0.382272	1	109	241	125	130	332	194	103	245
ENSMUSG00000005802.12	Slc30a4	-0.160966	5.26911	3.31867	0.0774991	1	774	676	806	860	722	884	1081	985
ENSMUSG00000005803.14	Sqor	-0.00782303	5.62144	0.00880101	0.92582	1	975	1025	1102	1064	922	1281	1049	1189
ENSMUSG00000005804.14	Bloc1s6	0.0158037	4.88213	0.0554262	0.81532	1	617	625	666	712	568	740	690	737
ENSMUSG00000005813.12	Metap1	-0.0229744	5.08063	0.138065	0.712569	1	606	699	751	766	633	800	818	788
ENSMUSG00000005823.9	Gpr108	0.15311	5.82348	5.49144	0.0252332	0.697482	1227	1223	1318	1328	1136	1295	1233	1329
ENSMUSG00000005824.7	Tnfsf14	-0.33325	2.09077	4.2591	0.0469119	0.859757	69	89	69	77	101	94	131	127
ENSMUSG00000005836.10	Gata6	0.334117	5.17554	22.8424	3.46846e-05	0.0208941	765	839	898	923	776	753	770	764
ENSMUSG00000005846.12	Rsl1d1	0.0458192	5.66469	0.370082	0.547091	1	1008	1018	1133	1033	1039	1178	1150	1162
ENSMUSG00000005864.7	Cnga2	0.183812	0.908368	0.336469	0.565887	1	54	26	34	36	33	49	23	40
ENSMUSG00000005871.15	Apc	0.00175679	6.8614	0.000774452	0.977965	1	1938	2425	2571	2744	2248	2722	2774	2650
ENSMUSG00000005873.6	Reep5	0.214868	7.31075	8.17698	0.00727284	0.415963	3573	3406	3726	4061	3580	3723	3474	3681
ENSMUSG00000005881.13	Ergic3	0.0709773	6.44219	0.686866	0.413139	1	1882	1789	1964	2005	1610	1983	1951	2128
ENSMUSG00000005882.18	Uqcc1	0.0936477	4.87428	1.92179	0.174881	1	578	591	654	686	617	701	636	676
ENSMUSG00000005883.15	Spo11	-1.14479	-0.299421	8.82597	0.00547999	0.359416	5	4	8	10	11	24	17	17
ENSMUSG00000005886.14	Ncoa2	-0.0241176	6.026	0.0714814	0.790843	1	1003	1199	1345	1393	1220	1354	1488	1445
ENSMUSG00000005891.7	Prl4a1	0	-3.49827	0	1	1	0	0	0	0	0	0	0	0
ENSMUSG00000005892.4	Trh	-0.163638	-2.54392	0.0462119	0.831104	1	2	3	2	1	1	3	1	3
ENSMUSG00000005893.14	Nr2c2	-0.395804	5.36819	6.7863	0.0151229	0.565762	438.75	421.64	530.64	703.75	607.83	748.06	958.72	722
ENSMUSG00000005897.14	Nr2c1	0.111439	4.26312	1.76113	0.19352	1	359	437	413	454	389	462	402	440
ENSMUSG00000005899.14	Smpd4	0.0420859	5.37506	0.366142	0.54922	1	638	857	945	1026	846	956	943	960
ENSMUSG00000005907.14	Pex1	-0.113657	3.60203	1.39245	0.246361	1	193.03	237.34	246.74	279.47	226.78	316.51	279.84	279.9
ENSMUSG00000005917.15	Otx1	0.327411	0.798851	2.22188	0.145489	1	23	33	43	51	38	35	27	40
ENSMUSG00000005936.19	Kctd20	0.0433303	6.74786	0.519085	0.476264	1	2047	2430	2384	2584	2380	2741	2561	2576
ENSMUSG00000005947.11	Itgae	-0.333099	3.98448	4.84953	0.0354692	0.784806	185	282	236	288	212	336	364	336
ENSMUSG00000005949.9	Ctns	-0.0560373	4.70701	0.518898	0.476343	1	467	596	574	660	542	727	650	644
ENSMUSG00000005950.14	P2rx5	0.154208	2.84845	1.30157	0.262072	1	111	144	155	172	164	166	171	121
ENSMUSG00000005951.13	Shpk	0.0709601	2.81916	0.339222	0.564205	1	141	129	162	147	128	141	151	171
ENSMUSG00000005952.15	Trpv1	-1.4258	-2.6039	2.88178	0.0989243	1	0	0	0	2	2	3	4	1
ENSMUSG00000005958.15	Ephb3	0.177448	5.57331	2.58481	0.117812	1	782	1121	1258	1479	1174	1287	1077	1136
ENSMUSG00000005968.14	Tuft1	0.16882	4.72853	3.31298	0.077742	1	459	560	644	657	559	588	532	633
ENSMUSG00000005973.6	Rcn1	0.168115	6.25278	4.62031	0.0389608	0.805853	1804	1771	1992	2066	1694	1888	1919	1896
ENSMUSG00000005980.15	Dnase1	-0.0507631	1.74517	0.0617507	0.805278	1	40.33	53.53	75.63	67.83	79.73	81.14	72.01	71.31
ENSMUSG00000005981.11	Trap1	-0.026209	5.8982	0.237377	0.629302	1	1133	1202	1348	1360	1152	1467	1376	1488
ENSMUSG00000005982.14	Naa60	0.0480449	6.23107	0.733598	0.397847	1	1514.23	1655.81	1813.21	1735.85	1576.66	1815.36	1825.16	1872.15
ENSMUSG00000005983.15	1700037C18Rik	-0.183616	2.52419	1.35449	0.252774	1	111.55	102.38	120.47	108.6	111.67	138.15	130.14	166.3
ENSMUSG00000005986.16	Ankrd13d	-0.0654871	2.16312	0.179496	0.674533	1	63	88	101	84	77	77	101	118
ENSMUSG00000005994.14	Tyrp1	1.44488	-3.43217	1.04328	0.321157	1	0	1	0	0	0	0	0	0
ENSMUSG00000006005.18	Tpr	-0.10582	6.96649	2.3169	0.137424	1	1894.83	2502.53	2821.16	2732.45	2310.61	2921.19	3086.02	3006.8
ENSMUSG00000006007.14	Pdc	0	-3.49827	0	1	1	0	0	0	0	0	0	0	0
ENSMUSG00000006010.14	Odr4	-0.0246622	5.62581	0.158855	0.692759	1	894	990.28	1074.67	1150	1005	1173.73	1143.77	1251.96
ENSMUSG00000006014.16	Prg4	0.330929	1.61329	0.25911	0.615725	1	31.17	87.19	54.18	70.55	99.39	43.08	68.22	75.24
ENSMUSG00000006019.15	Dhx34	-0.0329115	4.45042	0.159758	0.691934	1	334	450	508	491	408	508	496	528
ENSMUSG00000006021.5	Kptn	0.0583085	3.78862	0.460009	0.502311	1	261	291	296	322	282	324	330	303
ENSMUSG00000006024.13	Napa	0.155979	6.45389	4.90312	0.0337689	0.773031	1886	1797	2063	2078	1834	1999	1888	2078
ENSMUSG00000006050.12	Sra1	0.0472953	5.16846	0.161204	0.690817	1	824	742	771	782	681	773	916	848
ENSMUSG00000006056.13	Calcoco2	0.394192	-0.209192	1.23381	0.27463	1	18	18	22	15	17	18	17	12
ENSMUSG00000006057.15	Atp5g1	0.140343	5.46628	1.16843	0.28896	1	1104.91	916.09	981.14	980.36	887.03	962.2	975.69	1119
ENSMUSG00000006058.10	Snf8	0.0824986	5.06249	1.05661	0.311405	1	678	691.9	708	812	670	783	732	796
ENSMUSG00000006095.12	Tbcb	0.0652735	5.16016	0.254281	0.617935	1	886.26	681.98	742.74	853.83	685.9	854.42	820.18	867.63
ENSMUSG00000006127.9	Inpp5k	0.197467	6.73211	5.49551	0.0251831	0.696444	2116	2318	2556	2693	2280	2761	2057	2339
ENSMUSG00000006134.4	Crkl	-0.12819	6.26042	4.79839	0.0355971	0.786275	1346	1488	1648	1668	1396	1892	1927	1835
ENSMUSG00000006143.12	Upk3bl	-0.464242	-2.89846	0.149851	0.701219	1	0	0	1	0	2	0	1	2
ENSMUSG00000006154.13	Eps8l1	0.231068	5.56078	2.19111	0.151291	1	755	1083	1068	1384	1038	950	1026	1119
ENSMUSG00000006169.20	Clint1	-0.0919153	6.83579	2.25975	0.14221	1	2096	2294	2654	2526	2171	2871	2843	2868
ENSMUSG00000006179.9	Prss16	-0.711144	0.0349926	0.848312	0.366339	1	5	9	6	3	13	11	11	19
ENSMUSG00000006191.17	Cdkal1	-0.131215	3.53614	1.82949	0.18531	1	189	237	242	268	208	303	258	297
ENSMUSG00000006200.3	Rhox6	0	-3.49827	0	1	1	0	0	0	0	0	0	0	0
ENSMUSG00000006204.7	5430419D17Rik	-0.965422	-1.11542	4.77273	0.0360615	0.788519	5	6	3	10	5	11	22	6
ENSMUSG00000006205.13	Htra1	0.0845434	5.47084	1.51403	0.227155	1	959	935	1080	1112	915	1118	1028	1094
ENSMUSG00000006215.12	Zbtb17	-0.0700249	4.41864	0.734274	0.397632	1	355	440	500	458	359	536	492	489
ENSMUSG00000006216.10	Clcnkb	-3.46178	-3.25061	5.84758	0.0231286	0.677637	0	0	0	0	0	1	1	2
ENSMUSG00000006218.4	Fam131c	-0.813978	-0.215159	7.01674	0.012257	0.519738	16	11	19	9	17	29	17	42
ENSMUSG00000006219.12	Fblim1	-0.036601	6.35046	0.154258	0.697004	1	1527	2075	1991	1949	1498	2044	2306	1995
ENSMUSG00000006221.7	Hspb7	0.340871	4.114	3.68885	0.0657997	0.95538	440	435	536	616	454	466	338	539
ENSMUSG00000006235.6	Epor	0.0377305	2.05909	0.0461468	0.831221	1	63	99	101	130	94	135	88	100
ENSMUSG00000006241.16	Ccdc159	-0.365664	1.89947	4.01725	0.053233	0.898132	48	69	75	63	64	111	72	99
ENSMUSG00000006262.15	Mob1b	0.0670534	5.9056	0.634279	0.431437	1	971	1193	1205	1460	1227	1251	1316	1390
ENSMUSG00000006269.7	Atp6v1b1	-0.141078	2.98136	0.35181	0.558182	1	160	146	207	188	113	130	225	260
ENSMUSG00000006270.7	Vax1	0	-3.49827	0	1	1	0	0	0	0	0	0	0	0
ENSMUSG00000006273.14	Atp6v1b2	0.0925706	7.14993	2.36584	0.133475	1	2694	3224	3225	3578	3184	3493	3536	3194
ENSMUSG00000006276.10	Eps15l1	-0.0452363	5.95371	0.217285	0.644154	1	912	1396	1463	1495	1237	1532	1563	1480
ENSMUSG00000006281.8	Tep1	-0.170663	5.62155	2.04306	0.163438	1	818.46	1001.14	1110.7	1036.47	884.26	1091.69	1493.32	1150.11
ENSMUSG00000006288.8	Ttc5	-0.0431865	5.26208	0.47794	0.494153	1	668.97	816.92	809	867.86	753.92	938.87	911.89	916.88
ENSMUSG00000006289.14	Osgep	0.0663549	4.94892	0.504779	0.482359	1	692.25	603.57	682.17	721.14	617.73	736.02	725.89	719.94
ENSMUSG00000006299.13	Aamp	0.0875346	6.90287	2.14132	0.152763	1	2378	2506	2826	2967	2506	2877	2699	2938
ENSMUSG00000006301.17	Tmbim1	0.178832	7.67263	5.01877	0.0318687	0.757367	4300.51	4477	4764.87	5239.62	4365.48	5082.05	4154.59	4813.95
ENSMUSG00000006304.14	Arpc2	0.0861791	7.79378	0.693136	0.411037	1	4936	4679	4730	4846	4432	4807	5229	5325
ENSMUSG00000006307.16	Kmt2b	-0.203277	6.68846	1.82557	0.188749	1	1266	2097	2402	2235	1888	2646	2572	2527
ENSMUSG00000006310.10	Zbtb32	0.231434	2.10894	1.81055	0.187542	1	68	80	84	110	80	74	71	101
ENSMUSG00000006311.8	Etv2	0	-3.45382	0	1	1	0	0	0	0	0	0	0	0
ENSMUSG00000006313.5	Upk1a	-0.0550683	0.0111796	0.0225421	0.88156	1	19	11	18	18	15	27	11	20
ENSMUSG00000006315.9	Tmem147	0.256716	4.86426	2.27046	0.144417	1	851	619	674	625	582	677	616	654
ENSMUSG00000006333.14	Rps9	0.0129377	8.91472	0.0062747	0.937492	1	10813.9	8559.65	9448.82	9955.14	8316.03	10801	10217.8	11263.4
ENSMUSG00000006335.16	Tfpt	0.100082	3.31312	0.804963	0.376061	1	221	183	243	262	223	252	246	227
ENSMUSG00000006342.15	Susd2	-0.0779205	4.04752	0.676055	0.416803	1	294	291	377	393	306	394	371	436
ENSMUSG00000006344.17	Ggt5	-0.261055	4.08193	4.31181	0.0456475	0.854094	291	341	394	348	299	395	538	440
ENSMUSG00000006345.10	Ggt1	-0.268246	0.946337	0.954863	0.335537	1	16	43	39	39	37	64	32	47
ENSMUSG00000006356.10	Crip2	0.35132	8.73547	14.4514	0.000583592	0.122512	10385	10077	10960	12094	10295	9870	8797	10358
ENSMUSG00000006360.11	Crip1	0.0162427	6.90038	0.0109253	0.917595	1	3050	2248	2338	2540	2230	2586	2990	2931
ENSMUSG00000006362.16	Cbfa2t3	0.200129	6.93733	5.55027	0.0245192	0.689181	2553.98	3049.79	3419.89	3222.95	2886.97	3277.83	2814.71	2935.76
ENSMUSG00000006369.14	Fbln1	0.125644	6.61344	1.18382	0.285332	1	1906	2950	3081	2838	2355	2869	2800	2540
ENSMUSG00000006373.10	Pgrmc1	0.097662	7.70592	0.701682	0.408771	1	4363	3943	4487	4778	4334	5192	3911	5009
ENSMUSG00000006378.15	Gcat	0.325543	2.79642	2.94391	0.0956251	1	198.66	140.27	148.77	165.42	159.08	127	152.27	170
ENSMUSG00000006386.15	Tek	0.0972972	8.34365	1.00844	0.322526	1	5663	6843	8400	8575	6574	8440	7157	7395
ENSMUSG00000006389.13	Mpl	-0.401655	0.731747	1.36447	0.251822	1	14	44	28	21	36	34	41	55
ENSMUSG00000006390.15	Elovl1	0.248649	8.56476	3.67225	0.0653031	0.953658	8245	7896	8477	8923	7747	9370	6953	7610
ENSMUSG00000006392.16	Med8	0.0205416	5.34411	0.0739596	0.787337	1	848	817	838	968	809	1020	933	950
ENSMUSG00000006395.16	Hyi	0.0426955	4.03623	0.210969	0.648996	1	289	341	375	380	351	376	366	414
ENSMUSG00000006398.15	Cdc20	0.267722	3.73985	0.879069	0.358249	1	427	331	307	435.98	168	239	357	359
ENSMUSG00000006403.13	Adamts4	-0.884154	1.83197	8.01323	0.00870207	0.448201	64	67	57	44.73	42	108	159	83
ENSMUSG00000006411.12	Nectin4	0.0785066	4.23716	0.75223	0.391984	1	285	400	421	518	430	460	427	440
ENSMUSG00000006412.10	Pfdn2	0.120942	4.99653	1.67848	0.204044	1	669.54	722.03	689.85	732.67	719.8	762.47	738.23	737.41
ENSMUSG00000006418.17	Rnf114	-0.228969	6.84896	10.5023	0.00270805	0.26423	2226	2358	2390	2645	2102	3091	3290	3051
ENSMUSG00000006423.15	C330007P06Rik	0.0737781	5.88877	1.10372	0.301023	1	958.93	1238.9	1346.22	1454.08	1255.47	1301.3	1363.27	1397.42
ENSMUSG00000006435.16	Neurl1a	-0.150824	3.22182	1.46288	0.234998	1	179.68	207.89	188.67	206.9	174.59	262.47	199.85	269.62
ENSMUSG00000006442.10	Srm	0.0688992	3.84714	0.218985	0.643023	1	324	250	297	303	302	290	336	346
ENSMUSG00000006445.3	Epha2	-0.107915	6.35541	1.80473	0.188234	1	1376	1763	1814	1974	1566	1908	2081	2274
ENSMUSG00000006456.10	Rbm14	-0.0764861	5.35747	0.962312	0.333686	1	742.6	830.01	923.85	858.48	750.19	1013.47	968.83	988.97
ENSMUSG00000006457.4	Actn3	-2.35216	-0.286244	14.5301	0.000844595	0.150949	8	12	13	11	7	11	9	162
ENSMUSG00000006462.6	A530013C23Rik	0.33844	-0.868266	0.756928	0.390526	1	11	1	9	14	13	10	8	8
ENSMUSG00000006463.13	Zdhhc24	-0.174577	3.99639	4.81438	0.0353111	0.783732	258	290	330	369	320	417	394	400
ENSMUSG00000006464.9	Bbs1	-0.203338	4.07142	3.68451	0.0635303	0.946005	247	330	341	384	321	436	404	438
ENSMUSG00000006469.13	Slc34a3	0	-3.38956	0	1	1	0	0	0	0	0	0	0	0
ENSMUSG00000006471.18	Ndor1	-0.108538	5.25705	1.12625	0.296221	1	551.7	758.8	932.81	777.27	691.46	970.17	870.26	892.89
ENSMUSG00000006476.19	Nsmf	0.0872003	5.85746	1.68078	0.203742	1	1000	1313	1429	1320	1283	1433	1364	1293
ENSMUSG00000006488.17	Prl7a1	0	-3.49827	0	1	1	0	0	0	0	0	0	0	0
ENSMUSG00000006490.3	Prl8a9	0	-3.49827	0	1	1	0	0	0	0	0	0	0	0
ENSMUSG00000006494.11	Pdk1	0.0877455	5.24183	1.43007	0.240207	1	676	755	832	856	816	882	758	903
ENSMUSG00000006498.16	Ptbp1	0.0161041	7.97744	0.0802503	0.778714	1	4762.65	5577.4	5908.39	6134.67	4898.68	6047.48	6073.93	6367.36
ENSMUSG00000006517.5	Mvd	-0.122094	4.04571	0.726309	0.400658	1	337	278	363	306	274	311	452	405
ENSMUSG00000006519.11	Cyba	-0.119693	6.32949	0.575799	0.455194	1	1606	1465	1569	1485	1329	1734	2074	1778
ENSMUSG00000006522.17	Itih3	-0.145976	1.42283	0.482084	0.4923	1	54	55	60	59	37	63	80	58
ENSMUSG00000006526.13	Stimate	0.0849661	5.46102	1.16651	0.287887	1	844	905	998	999	846	1056	976	939
ENSMUSG00000006527.16	Sfmbt1	-0.070204	4.42367	1.19276	0.282619	1	391	421	455	478	421	530	516	515
ENSMUSG00000006529.16	Itih1	-0.367877	1.44538	2.84693	0.100905	1	38	45	59	41	37	61	94	39
ENSMUSG00000006538.12	Ihh	0.172184	-1.1304	0.098815	0.755219	1	7	5	4	6	9	4	4	11
ENSMUSG00000006542.13	Prkag3	0.419484	2.66222	6.10603	0.0187617	0.623311	127	147	147	193	119	126	103	146
ENSMUSG00000006546.3	Cryba2	-0.446896	-2.95954	0.136152	0.714624	1	0	0	1	1	0	0	1	1
ENSMUSG00000006567.11	Atp7b	0.331888	5.73919	4.08568	0.0543172	0.905758	1024	1091	1215	1268	1475	1247	839	1238
ENSMUSG00000006570.3	Defb2	0	-3.49827	0	1	1	0	0	0	0	0	0	0	0
ENSMUSG00000006574.15	Slc4a1	-0.442592	2.37601	0.454233	0.507285	1	14	181	26	45	248	269	100	116
ENSMUSG00000006575.14	Rundc3a	0.0820096	1.45384	0.217663	0.643867	1	45	47	60	45	63	48	64	57
ENSMUSG00000006576.16	Slc4a3	-0.0350213	4.51473	0.0523835	0.820682	1	302	497	589	583	465	577	527	594
ENSMUSG00000006585.3	Cdt1	-0.0612622	3.43383	0.209188	0.650377	1	218	180	240	251	208	242	280	264
ENSMUSG00000006586.15	Runx1t1	-0.189358	2.81655	1.55747	0.220749	1	72	154	121	145	113	166	163	141
ENSMUSG00000006587.6	Snai3	0.447502	0.0931927	2.22017	0.145638	1	10	15	27	18	22	14	13	19
ENSMUSG00000006589.8	Aprt	0.178365	4.91975	2.8882	0.0985642	1	680	607	664	675	632	684	633	669
ENSMUSG00000006599.13	Gtf2h1	0.03835	5.023	0.276104	0.602751	1	651	635	642	745	710	790	774	703
ENSMUSG00000006611.15	Hfe	-0.370151	5.75492	15.3549	0.000419581	0.102425	1096	1010	1126	1052	837	1437	1642	1479
ENSMUSG00000006638.15	Abhd1	-0.230242	1.18909	1.44676	0.237539	1	36.93	45.56	41.03	37.38	40.37	63.68	55.13	43.64
ENSMUSG00000006641.12	Slc5a6	0.016348	2.95252	0.0212055	0.885099	1	139.89	173	192.32	155	149	180.17	181.05	188
ENSMUSG00000006642.3	Tcf23	0.545473	2.13894	2.07524	0.162648	1	120	100	106	121	112	90	53	122
ENSMUSG00000006649.17	Nphs1	0.0331702	4.98634	0.0251406	0.875392	1	790.56	472.73	586.01	603.79	559.1	661.74	627.57	756.24
ENSMUSG00000006651.8	Aplp1	0.0917352	2.79822	0.420043	0.521364	1	137	143	154	161	154	186	148	149
ENSMUSG00000006673.14	Qrich1	0.0641889	6.28385	1.2276	0.275821	1	1479	1716.99	1908.53	1864.4	1519.74	1847.3	1801	1916
ENSMUSG00000006675.10	P4htm	0.0659383	3.35353	0.403081	0.529845	1	189	201	247	241	220	255	197	268
ENSMUSG00000006676.16	Usp19	-0.0708249	7.38348	0.314088	0.579622	1	2303	3727	4044	3953	3375	4276	4007	4168
ENSMUSG00000006678.6	Pola1	0.0829398	3.41634	0.41267	0.52502	1	199	216	224	248	216	206	253	256
ENSMUSG00000006699.17	Cdc42	0.165081	8.79767	3.5445	0.0685128	0.970171	10026	9367	10000	10700	9431	9612	10244	10581
ENSMUSG00000006705.13	Pknox1	-0.0153014	5.12433	0.052964	0.819393	1	632	732	791	739	687	856	835	793
ENSMUSG00000006711.15	D130043K22Rik	-0.562791	1.23121	6.45328	0.015922	0.579124	27	32	35	34	42	63	43	67
ENSMUSG00000006715.11	Gmnn	0.104344	2.99832	0.473257	0.496261	1	181	167	142	174	174	159	187	193
ENSMUSG00000006717.7	Acot13	0.142778	4.26903	1.08858	0.304938	1	460	376	409	431	356	460	380	431
ENSMUSG00000006720.16	Zfp184	0.197883	1.14094	1.23119	0.275132	1	39	52	52	51	44	50	52	40
ENSMUSG00000006724.12	Cyp27b1	0.366608	-2.00682	0.24147	0.626373	1	6	3	3	5	0	2	2	5
ENSMUSG00000006728.12	Cdk4	0.0647044	6.65892	0.432797	0.515146	1	2264.41	2002.35	2113.39	2325.96	2008.51	2385.97	2302.08	2378.25
ENSMUSG00000006731.10	B4galnt1	-0.131834	6.81879	2.59799	0.116448	1	2050.24	2089.02	2372.59	2027.62	2003.38	2519.2	2714.65	2722.32
ENSMUSG00000006732.14	Mettl1	-0.151669	3.30136	1.84758	0.183209	1	193	204	220	204	190	240	285	247
ENSMUSG00000006736.9	Tspan31	0.0514978	5.95369	0.488284	0.48955	1	1359.59	1318.65	1428.61	1396.04	1253.49	1483.03	1463.92	1544.75
ENSMUSG00000006740.14	Kif5b	-0.020602	7.24139	0.0677658	0.796222	1	2279.91	2815.73	3077.87	3539.79	2914.86	3086.64	3553.81	3496.77
ENSMUSG00000006763.14	Saal1	-0.0311968	3.43084	0.0916989	0.763914	1	223	205	226	254	194	283	241	250
ENSMUSG00000006764.8	Tph2	0	-3.26945	0	1	1	0	0	0	0	0	0	0	0
ENSMUSG00000006777.7	Krt23	0.146017	3.91202	1.34757	0.253966	1	322	337	371	395	330	448	327	313
ENSMUSG00000006782.16	Cnp	-0.201638	6.17696	5.9948	0.0197842	0.636719	1329.3	1274.16	1502.21	1424.79	1193.45	1708.56	1777.44	1831.09
ENSMUSG00000006784.14	Ttc25	-0.353717	3.61268	10.0548	0.00325735	0.287151	190	234	238	266	215	306	324	371
ENSMUSG00000006800.14	Sulf2	0.0219038	5.89855	0.0378429	0.847043	1	1412.46	1391.32	1743.47	1447.61	1228.3	1492.16	1839.38	1552.71
ENSMUSG00000006818.5	Sod2	-0.114444	6.60213	2.37312	0.132899	1	1919.55	1867.05	2102.92	2211.41	1933.43	2266.31	2741.45	2455.03
ENSMUSG00000006850.8	Tmco6	0.152246	3.88109	2.2843	0.140131	1	323	315	307	318	285	306	311	344
ENSMUSG00000006906.10	Stambp	-0.00664697	4.62232	0.00887472	0.925511	1	497	516	534	580	512	604	590	629
ENSMUSG00000006920.14	Ezh1	0.0327275	6.47477	0.247691	0.62198	1	1444	1842	2005	2188	1819	2187	1908	2119
ENSMUSG00000006930.15	Hap1	-0.234563	4.22409	1.74425	0.198361	1	263	489	446	531	375	479	639	565
ENSMUSG00000006931.15	P3h4	0.0711321	4.37345	0.599253	0.44433	1	444	433	442	472	454	519	419	536
ENSMUSG00000006932.17	Ctnnb1	0.0422294	9.85766	0.469408	0.498006	1	16625.3	19930.1	22708.7	22634.3	19467.4	22456.4	22607.4	22290.3
ENSMUSG00000006941.5	Eif1b	-0.0270227	4.92336	0.07532	0.78544	1	652	577	602	688	640	756	711	753
ENSMUSG00000006948.7	Klk4	0	-3.49827	0	1	1	0	0	0	0	0	0	0	0
ENSMUSG00000006958.14	Chrd	0.0496114	1.68923	0.0590475	0.8095	1	53	76	89	85	74	90	67	92
ENSMUSG00000006998.16	Psmd2	0.0223917	7.26838	0.1539	0.697338	1	3026.27	3363.43	3582.37	3593.5	3096.04	3614.02	3911.39	3734.25
ENSMUSG00000007021.5	Syngr3	-0.278878	-0.770758	0.568176	0.456287	1	13	9	8	8	6	15	10	12
ENSMUSG00000007029.16	Vars	-0.180038	6.45647	5.04351	0.0314776	0.754782	1510	1738	1935	1799	1594	1918	2334	2415
ENSMUSG00000007030.8	Vwa7	-0.0823513	2.44695	0.163981	0.68811	1	65.41	116.86	137.93	122.88	113.03	152.84	118.09	130.23
ENSMUSG00000007033.4	Hspa1l	-0.129788	1.42693	0.481611	0.492511	1	52.62	54.31	55.92	56.26	49.31	73.61	58.96	69.58
ENSMUSG00000007034.15	Slc44a4	-0.208584	4.00255	3.84651	0.0582637	0.924667	328	292	372	328	287	381	404	494
ENSMUSG00000007035.15	Msh5	-0.246531	1.60475	1.68072	0.203749	1	44	55	63	54	64	79	78	71
ENSMUSG00000007036.15	Abhd16a	0.0647069	5.97653	0.90925	0.347191	1	1266	1323	1450	1492	1246	1565	1380	1506
ENSMUSG00000007038.5	Neu1	-0.0341769	5.59751	0.33427	0.567049	1	855	1012	1022	1099	1012	1223	1179	1110
ENSMUSG00000007039.12	Ddah2	0.233507	5.72654	5.21351	0.0289284	0.73442	1187	1174	1221	1369	1130	1269	1146	1141
ENSMUSG00000007041.9	Clic1	0.0313624	7.36338	0.0926615	0.762717	1	3726	3385	3540	3718	3113	3810	3976	4013
ENSMUSG00000007050.17	Lsm2	-0.122926	3.27968	1.41356	0.242883	1	177	181	212	219	187	229	255	245
ENSMUSG00000007080.14	Pole	-0.236022	2.78428	0.828118	0.371194	1	119	119	109	141	79	88	209	161
ENSMUSG00000007097.14	Atp1a2	0.128569	7.0514	0.894414	0.352769	1	2143.7	3091.69	3562.53	3809.88	2854.72	3483.76	3011.71	3127.61
ENSMUSG00000007107.6	Atp1a4	-1.13654	-2.92852	1.41079	0.243337	1	0	1	0	1	1	2	1	2
ENSMUSG00000007122.11	Casq1	-0.741026	0.596855	3.92971	0.0573519	0.92156	36	22	38	39	31	21	47	124
ENSMUSG00000007207.10	Stx1a	-0.0273927	2.77484	0.0298554	0.863866	1	87	164	166	170	144	174	181	152
ENSMUSG00000007209.4	Ceacam9	0	-3.49827	0	1	1	0	0	0	0	0	0	0	0
ENSMUSG00000007216.6	Zfp775	0.286329	2.97577	6.04082	0.019354	0.631171	188	164	190	223	187	180	163.87	193
ENSMUSG00000007279.14	Scube2	-0.265615	5.50047	2.63242	0.11753	1	589	974	924	1023	653	1291	1071	1044
ENSMUSG00000007338.10	Mrpl49	0.0662593	4.78902	0.483493	0.491673	1	602	608	623	618	516	658	645	648
ENSMUSG00000007379.15	Dennd2c	0.349652	3.30291	9.9955	0.00333865	0.289567	199	234	232	268	264	228	196	221
ENSMUSG00000007411.16	Mark3	0.0910833	6.04666	2.34014	0.135532	1	1259	1442	1459	1498	1425	1612	1481	1476
ENSMUSG00000007415.15	Gatad1	0.105159	5.7884	0.851264	0.363418	1	1315.6	1194.06	1122.72	1228.62	1191.15	1283.68	1213.92	1396.51
ENSMUSG00000007440.10	Pcdha11	0.594734	-0.504293	1.60457	0.214604	1	9.48	19.13	23.28	20.94	10.56	10.82	7.68	18.99
ENSMUSG00000007457.3	2310003L06Rik	0	-3.49827	0	1	1	0	0	0	0	0	0	0	0
ENSMUSG00000007458.14	M6pr	0.0401671	7.74922	0.231556	0.633522	1	4654.74	4549.95	4628.55	4793.85	4260	5071.77	5065.29	5208.4
ENSMUSG00000007476.18	Lrrc8a	-0.104245	6.13268	1.44663	0.23756	1	1331.21	1473.97	1682.93	1491.71	1434.69	1883.13	1775.55	1816.52
ENSMUSG00000007480.4	Mc5r	-0.60045	-0.84394	3.40006	0.0741161	0.993611	6	8	9	9	10	10	10	24
ENSMUSG00000007564.15	Ppp2r1a	0.0740375	7.53246	1.22572	0.276181	1	3776	3899	4328	4446	3687	4323	4263	4553
ENSMUSG00000007570.16	Fance	0.043002	3.97959	0.24339	0.625009	1	306	321	351	358	288	334	345	404
ENSMUSG00000007589.9	Tinf2	-0.0432052	5.10194	0.441678	0.510894	1	573.83	710.92	773.5	781.2	712.9	807.13	834.09	866.33
ENSMUSG00000007591.15	Tssk4	-0.248646	0.153388	1.04075	0.315008	1	15	21	15	24	17	22	25	28
ENSMUSG00000007594.10	Hapln4	-0.506104	-2.33844	0.352551	0.556689	1	2	5	1	1	0	1	2	6
ENSMUSG00000007603.9	Dus3l	0.0679346	5.38943	0.387844	0.537808	1	640	938	1008	987	867	1081	884	928
ENSMUSG00000007610.15	Gtpbp3	-0.0273764	4.47261	0.13501	0.71562	1	386	505	514	512	479	570	572	531
ENSMUSG00000007613.15	Tgfbr1	0.00624801	6.24556	0.00621554	0.937633	1	1209	1487	1656	1612	1490	1624	1804	1653
ENSMUSG00000007617.18	Homer1	-0.108218	3.12032	0.875249	0.356248	1	140	155	165	184	188	192	205	219
ENSMUSG00000007646.13	Rad51c	-0.425278	1.0414	4.7687	0.0361351	0.788519	26	38	39	34	26	45	51	54
ENSMUSG00000007653.12	Gabrb2	-0.469905	-3.19441	0.146058	0.705406	1	1	1	0	1	0	0	3	0
ENSMUSG00000007655.16	Cav1	0.205364	10.3186	5.83143	0.0213974	0.655174	28038	27045	30889	32499	28203	30252	25681	31595
ENSMUSG00000007656.13	Arpp19	0.168884	6.14684	5.02026	0.031845	0.757367	1457	1434	1563	1798	1450	1503	1533	1670
ENSMUSG00000007659.18	Bcl2l1	-0.00308318	6.88084	0.000478256	0.982719	1	2862	1928	2337	2338	2702	2757	2510	3209
ENSMUSG00000007670.10	Khsrp	-0.0159757	6.69032	0.0190182	0.891247	1	1598	2324	2605	2420	2157	2544	2567	2553
ENSMUSG00000007682.6	Dio2	-0.47785	1.40529	5.33736	0.0272134	0.718444	56	53	65	41	33	69	91	78
ENSMUSG00000007721.6	Ccdc124	0.0819986	4.89116	0.62603	0.43442	1	652	570	678	639	578	724	654	651
ENSMUSG00000007739.10	Cct4	0.0135349	6.84493	0.0266892	0.871217	1	2393	2445	2477	2481	2203	2701	2698	2791
ENSMUSG00000007777.9	0610009B22Rik	0.0888854	3.39502	0.434325	0.51441	1	231	225	200	205	184	234	217	228
ENSMUSG00000007783.10	Cpt1c	-0.190033	3.15635	2.49367	0.123767	1	139	193	215.94	181	160.97	221	229.98	244
ENSMUSG00000007805.4	Twist2	0.426764	0.83463	3.06967	0.0889797	1	48.32	37.05	30.49	47.62	49.46	38.24	34.54	36.72
ENSMUSG00000007812.16	Zfp655	-0.0648236	5.23057	0.962971	0.333522	1	670	789	798	909	668	874	903	970
ENSMUSG00000007815.13	Rhoa	0.0720713	8.97805	1.37412	0.249431	1	10534.9	10924.4	11922.4	12385.7	10491	11695.6	12137.4	12940.2
ENSMUSG00000007817.15	Zmiz1	-0.0337938	7.68374	0.108405	0.744032	1	2948.97	4621.98	5090.98	4555.98	4169.97	5344.99	4651.97	4943.93
ENSMUSG00000007827.10	Ankrd26	-0.380854	3.31169	9.84632	0.003553	0.296999	112	181	196	171	177	261	249	235
ENSMUSG00000007833.15	Aldh16a1	0.00146467	5.07351	0.000464855	0.982927	1	613.54	687.09	795.75	803.52	715.57	825.25	803.05	847.29
ENSMUSG00000007836.6	Hnrnpa0	0.148648	6.70675	3.62889	0.0654595	0.953788	2139	2025	2145	2363	2435	2281	2223	2405
ENSMUSG00000007837.11	Prrg2	-0.0267329	4.1901	0.0780917	0.78163	1	395	369	398	420	350	488	451	415
ENSMUSG00000007850.16	Hnrnph1	0.0457506	8.37585	0.0805987	0.778829	1	4137.99	7234.94	7486.79	8538.78	7274.93	7717.98	7278.81	7845.85
ENSMUSG00000007867.9	Ift43	0.1424	4.46177	1.58436	0.216895	1	489	443	506	567	458	495	473	567
ENSMUSG00000007872.3	Id3	0.277569	7.17599	7.28298	0.0108526	0.491656	3796	2977	3423	3326	3507	3417	3231	3075
ENSMUSG00000007877.2	Tcap	0.206121	4.06033	0.511354	0.481892	1	390	373	488	617	456	410	213	761
ENSMUSG00000007880.16	Arid1a	-0.224263	7.59691	3.02904	0.0928359	1	2385	3994	4245	4255	3689	4979	5163	4618
ENSMUSG00000007888.15	Crlf1	0.118451	4.03994	1.33486	0.256173	1	331	335	326	385	337	415	336	335
ENSMUSG00000007891.16	Ctsd	0.0628839	9.56511	0.501791	0.483648	1	13853	14622	15426	14398	13092	16878	15187	14977
ENSMUSG00000007892.8	Rplp1	0.186503	9.0216	0.830024	0.371611	1	13563.7	9308.96	9826.93	11255.4	9314.37	10316.9	10543.7	11649.9
ENSMUSG00000007907.4	Cabs1	0	-3.49827	0	1	1	0	0	0	0	0	0	0	0
ENSMUSG00000007908.14	Hmgcll1	-0.0161405	3.80124	0.0242987	0.877069	1	242.98	301.96	308.91	327.98	217.96	344	290.96	333.95
ENSMUSG00000007944.8	Ttc9b	0.153928	-2.35872	0.0309933	0.861323	1	1.19	4.1	1.26	1.43	2.84	3.95	1.38	1.32
ENSMUSG00000007946.11	Phox2a	-1.81221	-2.97502	1.14743	0.293477	1	0	0	0	0	0	0	1	0
ENSMUSG00000007950.9	Abhd8	0.0140251	4.68261	0.0155565	0.901491	1	558	503	545	532	445	572	586	606
ENSMUSG00000007987.12	Ift22	-0.117304	4.224	1.30538	0.261389	1	413	368	356	438	314	484	444	484
ENSMUSG00000007989.7	Fzd3	0.0457653	3.71048	0.225111	0.638273	1	213	275	289	289	277	276	294	322
ENSMUSG00000008028.15	1700008O03Rik	-0.368936	-2.00423	0.36674	0.548896	1	3.84	3.72	1	2	5.59	3.73	7.77	3.04
ENSMUSG00000008035.12	Mid1ip1	0.292912	7.63777	7.548	0.00965439	0.466894	4774	4477	4887	4590	4878	4343	4295	4672
ENSMUSG00000008036.11	Ap2s1	0.16563	5.69709	1.62936	0.212354	1	1289	1066	1106	1219	1024	1104	1216	1193
ENSMUSG00000008090.14	Fgfrl1	0.112662	4.49831	1.50408	0.228654	1	476	492	538	553	455	552	479	567
ENSMUSG00000008129.14	4930432K21Rik	0.314178	-0.0110407	1.40423	0.244413	1	18	23	28	19	19	27	13	19
ENSMUSG00000008136.14	Fhl2	0.104097	2.68829	0.465622	0.499732	1	135	130	178	182	146	156	129	207
ENSMUSG00000008140.18	Emc10	0.111676	6.28988	2.26353	0.141887	1	1706	1665	1775	1882	1609	1839	1802	1860
ENSMUSG00000008153.12	Clstn3	0.559369	0.816397	5.59364	0.0240069	0.685505	38	36	40	52	36	30	23	41
ENSMUSG00000008167.14	Fbxw9	-0.0018138	4.14955	0.000474084	0.982759	1	337	348.9	417.54	397.79	337.82	456.88	366.95	440.43
ENSMUSG00000008193.13	Spib	-0.700223	5.33064	19.9895	0.000143837	0.0557193	309	382	534	366	345	698	726	728
ENSMUSG00000008200.15	Fnbp4	-0.214078	6.40007	2.02198	0.16741	1	1000	1749	1846	1923	1607	2096	2124	2192
ENSMUSG00000008206.16	Cers4	0.0234549	6.22428	0.0661313	0.798639	1	1145	1601.72	1693.76	1943	1629.77	1873.72	1676.2	1831.05
ENSMUSG00000008226.14	Scrn3	0.0964119	4.74516	1.45988	0.235468	1	489	537	565	653	508	557	538	671
ENSMUSG00000008301.11	Phax	0.108383	4.94884	1.00247	0.323941	1	651.53	593.27	659.65	701.93	685.75	683.9	659.48	761.98
ENSMUSG00000008305.18	Tle1	-0.0404948	5.71843	0.188056	0.667338	1	1214.63	1105.29	1174	1046	1197.13	1402	1350.65	1329
ENSMUSG00000008307.11	1700109H08Rik	-0.321356	0.410786	1.13399	0.294593	1	7	20.05	26	16.06	19	28	31	16
ENSMUSG00000008318.10	Relt	-0.136423	3.5613	1.18596	0.283972	1	203	274	239	243	220	256	289	346
ENSMUSG00000008333.12	Snrpb2	0.0202755	4.81925	0.0359906	0.850688	1	597	525	564	607	548	637	633	662
ENSMUSG00000008348.9	Ubc	0.000688534	7.74783	8.37283e-05	0.992754	1	3916.78	4418.67	5232.53	5024.03	4760.07	5447.12	4933.52	5628.15
ENSMUSG00000008373.16	Prpf31	0.0628704	5.02213	0.60394	0.44257	1	723.94	669.43	725.55	724.69	642.97	769.47	743.94	787.62
ENSMUSG00000008384.8	Sertad1	-0.165073	4.95154	1.43543	0.240967	1	580	614	512	822	567	713	780	889
ENSMUSG00000008393.9	Carhsp1	0.18099	7.12102	4.30567	0.0457928	0.854332	3347.08	3196.15	3288.34	3480.93	3082.65	3445.62	2996.86	3534.29
ENSMUSG00000008398.15	Elk3	0.116468	7.26001	2.85517	0.100432	1	2874.42	3465.49	3825.82	3913.73	3022.26	3914.96	3372.54	3503.41
ENSMUSG00000008429.8	Herpud2	0.0549155	5.7173	0.816898	0.372587	1	945	1146	1191	1208	1077	1240	1141	1296
ENSMUSG00000008435.15	Rdh13	-0.0528451	4.09735	0.443901	0.50984	1	300	365	358	371	376	423	394	445
ENSMUSG00000008438.3	Adam21	-0.0110261	-2.00578	0.000327911	0.985661	1	6	3	2	3	6	5	4	5
ENSMUSG00000008450.8	Nutf2	0.0802322	4.42262	0.486794	0.490209	1	483.22	415.32	485.67	446.77	359.77	471.59	475.57	481.31
ENSMUSG00000008461.6	Fut1	-1.05801	-0.738818	4.99677	0.033531	0.770351	3	4	2	3	1	5	9	5
ENSMUSG00000008475.13	Arpc5	0.0623517	7.6335	0.520377	0.47572	1	4377	4142	4246	4557	4075	4515	4726.99	4889
ENSMUSG00000008482.9	Rnf151	-0.847442	-2.95924	0.577419	0.452677	1	0	2	0	1	0	2	2	0
ENSMUSG00000008489.18	Elavl2	0.0978869	-1.82517	0.0393373	0.843989	1	3	2	4	8	5	2	6	6
ENSMUSG00000008496.19	Pou2f2	-0.342076	4.57148	5.19359	0.0306936	0.745989	227	492	511	418	376	580	527	641
ENSMUSG00000008540.11	Mgst1	0.161073	7.71822	1.17971	0.287496	1	4921	4064	4438	4895	4286	5491	3802	4676
ENSMUSG00000008575.17	Nfib	0.0911302	7.74376	1.5307	0.224669	1	4189	4266	4933	5581	4301	5125	4803	5038
ENSMUSG00000008590.4	Htr3b	0.0292862	-3.23149	0.000560163	0.981284	1	0	0	0	2	1	0	0	2
ENSMUSG00000008601.12	Rab25	0.12995	4.56617	0.838504	0.367472	1	561	489	500	494	453	512	506	560
ENSMUSG00000008604.11	Ubqln4	0.0484061	6.05819	0.758675	0.389986	1	1165	1488	1510	1637	1352	1599	1545	1590
ENSMUSG00000008658.16	Rbfox1	-0.0883449	-0.455607	0.0456671	0.832086	1	10	8	17	19	12	20	6	22
ENSMUSG00000008668.15	Rps18	-0.000756534	8.46789	1.52083e-05	0.996921	1	8396.6	6057.79	6593.52	6857.57	5927.15	7632.17	7634.64	8223.28
ENSMUSG00000008682.13	Rpl10	0.0598127	9.35455	0.120079	0.731886	1	16648.1	12112.6	13422.6	13827.6	11908.4	15178.3	14256.2	15763
ENSMUSG00000008683.16	Rps15a	0.0396163	7.76315	0.0394606	0.844277	1	5202.82	3670.22	3839.84	4248.36	3776.82	4581.5	4503.3	4929.53
ENSMUSG00000008690.15	Ncaph2	0.0461798	6.56135	0.416537	0.523097	1	1978.06	1971.81	2173.7	2341.82	1758.85	2181.22	2185.74	2434.36
ENSMUSG00000008730.17	Hipk1	-0.0490978	7.89511	0.641356	0.428903	1	3834.98	4363	4931	5264	4632	5440	5379	5496
ENSMUSG00000008734.9	Gprc5b	0.0221259	5.39925	0.111215	0.740858	1	765.84	870.87	927.59	968.52	844.61	1073.88	889	995.36
ENSMUSG00000008763.16	Man1a2	0.0120089	6.03027	0.0354638	0.851771	1	1249	1248	1517	1449	1299	1439	1626	1538
ENSMUSG00000008789.10	Ceacam5	0	-3.49827	0	1	1	0	0	0	0	0	0	0	0
ENSMUSG00000008813.13	Tppp2	0	-3.47591	0	1	1	0	0	0	0	0	0	0	0
ENSMUSG00000008822.15	Acyp1	0.0824354	2.86882	0.347974	0.559247	1	178	141	137	173	133	169	159	169
ENSMUSG00000008843.4	Cldn13	-1.6196	-1.92209	4.24294	0.0474533	0.864818	0	6	0	0	4	10	7	5
ENSMUSG00000008845.9	Cd163	-0.190304	3.91576	0.623562	0.437694	1	490	426	569	410	367	393	867	514
ENSMUSG00000008855.17	Hdac5	0.2085	6.91039	6.44139	0.0160111	0.580375	2131	2682	3187	3080	2392	2897	2448	2616
ENSMUSG00000008859.8	Rala	0.210779	6.15246	5.28191	0.0279671	0.726312	1582	1593	1534	1681	1569	1536	1502	1706
ENSMUSG00000008874.3	Clec3a	1.4473	-3.41076	1.03219	0.320557	1	0	0	0	0	1	0	0	0
ENSMUSG00000008892.12	Vdac3	0.104448	6.28001	0.913103	0.346628	1	1894.08	1586.21	1678.55	1744.39	1589.23	1755.87	1804.75	1901.57
ENSMUSG00000008932.10	Slc1a7	0.610029	-1.31381	1.8558	0.182263	1	4	12	16	12	8	5	9	9
ENSMUSG00000008958.14	Vps72	-0.00501318	5.40358	0.00536673	0.94204	1	836	953	923	904	825	1042	983	1042
ENSMUSG00000008976.16	Gabpa	0.0989201	5.67994	1.50487	0.228535	1	777.67	1020.29	1148.13	1243.13	1056	1128.12	1090.09	1126.11
ENSMUSG00000008999.7	Bmp7	-0.235439	2.16252	1.28272	0.265491	1	53	67	115	108	48	102	90	120
ENSMUSG00000009013.5	Dynll1	0.045318	7.45377	0.139297	0.711688	1	4089.11	3788	3570	3968.02	3286	3991	4111.06	4420
ENSMUSG00000009030.14	Pdcl	0.101767	5.3901	2.36772	0.133326	1	727	882	974	996	883	945	921	982
ENSMUSG00000009035.15	Tmem184b	0.0710858	7.42791	1.14694	0.291898	1	3367	4293	4399	4337	3683	4491	4279	4325
ENSMUSG00000009047.4	Gm5965	0	-3.49827	0	1	1	0	0	0	0	0	0	0	0
ENSMUSG00000009070.14	Rsph14	-0.430701	1.90194	6.85702	0.013193	0.538532	63	71	77	67	54	107	79	122
ENSMUSG00000009073.16	Nf2	0.0617484	6.87998	1.36617	0.250778	1	2145	2589	2848	2740	2409	2780	2705	2875
ENSMUSG00000009075.2	Cabp7	0.518403	-0.440675	2.61852	0.115066	1	21.76	4.38	17.1	21.75	14.14	14.02	14.04	9.8
ENSMUSG00000009076.10	Zmat5	0.0927344	4.01074	0.362556	0.551722	1	415.24	307.62	330.9	334.25	314.86	374.98	334.96	397.2
ENSMUSG00000009079.16	Ewsr1	-0.0447309	7.80835	0.239002	0.628136	1	3440.85	4904.14	5169.12	5451.16	4439.72	5522.88	5411.6	5540.11
ENSMUSG00000009090.17	Ap1b1	-0.0160848	6.45908	0.0784745	0.78111	1	1635	1912	2131	1979	1809	2126	2297	2140
ENSMUSG00000009092.5	Derl3	0.0832061	2.51395	0.147079	0.703782	1	72	49	58	46	47	47	59	72
ENSMUSG00000009093.7	Gstt4	-0.429713	-2.9593	0.112962	0.738908	1	1	0	1	0	0	0	0	2
ENSMUSG00000009097.10	Tbx1	0.0800955	3.44402	0.660588	0.422131	1	212	241	245	258	237	248	231	297
ENSMUSG00000009108.15	Gnat2	0.22594	-2.19427	0.103805	0.749327	1	2	3	1	3	3	2	2	3
ENSMUSG00000009112.4	Bcl2l13	-0.0434094	5.52495	0.318436	0.576334	1	873.18	863.29	1063.45	959.66	826.68	1140.16	1079.61	1025.12
ENSMUSG00000009114.17	2610028H24Rik	0.116844	4.96419	1.09637	0.302612	1	586.17	651.78	750.74	728.89	633.17	735.44	594.41	791.49
ENSMUSG00000009115.5	Spatc1l	-0.297143	-2.29824	0.113535	0.738271	1	1	1	1	2	2	0	2	4
ENSMUSG00000009145.6	Dqx1	-0.0848265	2.89916	0.18035	0.67406	1	87	153	163	169	124	168	142	193
ENSMUSG00000009185.2	Ccl8	-0.93337	5.26263	3.89665	0.0609593	0.939055	1626	1029	1144	641	508	996	3979	1613
ENSMUSG00000009207.15	Lnpk	-0.0698337	3.24696	0.379034	0.54231	1	128	166	155	198	187	203	190	207
ENSMUSG00000009210.10	Prr29	-0.587236	2.31311	17.3035	0.000210839	0.0695531	91	93	98	84	64	162	135	148
ENSMUSG00000009214.9	Mymk	-0.637154	-1.82728	1.04607	0.313794	1	3	2	2	2	2	3	5	4
ENSMUSG00000009216.7	Fam163b	-1.10642	-1.70541	3.48736	0.0706706	0.980041	1	1	4	4	2	3	12	3
ENSMUSG00000009246.14	Trpm5	0.0440882	-0.638737	0.0161922	0.89951	1	10	12.1	12.37	12.57	7.23	14.26	13.26	8.49
ENSMUSG00000009248.6	Ascl2	-0.0719387	-1.61527	0.023166	0.879946	1	3	6	5	5	10	7	5	9
ENSMUSG00000009281.6	Rarres2	0.151237	6.72643	2.73368	0.10766	1	2290.21	2401.17	2467.97	2458.31	2352.78	2452.96	2460.26	2509.82
ENSMUSG00000009291.13	Pttg1ip	0.129874	7.93686	3.53005	0.0690514	0.972281	5366	5360	5913	6043	5329	5797	5632	6183
ENSMUSG00000009292.18	Trpm2	-0.645433	3.11557	3.61596	0.0698697	0.977962	33	116	100	79	224	189	158	248
ENSMUSG00000009293.17	Ube2g2	0.060773	5.88321	0.625193	0.434725	1	1328	1225	1334	1369.81	1215	1392.97	1424	1459
ENSMUSG00000009350.13	Mpo	-0.748349	0.106349	0.828719	0.372335	1	1	65.35	0	2	37	48.95	41	33
ENSMUSG00000009356.12	Lpo	-0.469066	-2.99065	0.180274	0.673956	1	0	2	0	1	0	1	0	2
ENSMUSG00000009376.15	Met	0.0229662	6.00706	0.0657339	0.799231	1	1253	1273	1332	1418	1271	1393	1632	1404
ENSMUSG00000009378.4	Slc16a12	-0.113104	3.37262	0.599524	0.444228	1	225	205	236	203	215	217	299	293
ENSMUSG00000009394.13	Syn2	-0.364607	3.57206	4.09176	0.0526819	0.896433	166	214	302	237	228	421	307	280
ENSMUSG00000009406.13	Elk1	0.0538032	4.0396	0.309755	0.581555	1	351	340	347	385	293	405	400	331
ENSMUSG00000009418.16	Nav1	-0.0982625	6.54443	1.33123	0.256809	1	1434.94	2030.99	2029.98	1866.96	1816.99	2246	2295	2190.96
ENSMUSG00000009470.17	Tnpo1	0.0833812	6.60933	0.97473	0.33063	1	1591.52	1803.57	1924.51	2475.9	1897.54	1958.63	2159.71	2134.56
ENSMUSG00000009471.4	Myod1	-3.45987	-3.34873	5.98132	0.0232344	0.677637	0	0	0	0	0	0	1	3
ENSMUSG00000009487.10	Otog	-1.81073	-3.47595	1.59063	0.22896	1	0	0	0	0	0	1	0	0
ENSMUSG00000009535.13	Rnmt	-0.0242978	4.53304	0.124155	0.726794	1	406	498	473	572	478	544	588	559
ENSMUSG00000009545.14	Kcnq1	-0.0580734	4.95487	0.390689	0.536201	1	745	701	723.99	656	555	871	735	825
ENSMUSG00000009549.14	Srp14	0.0827139	6.01178	0.435888	0.514474	1	1543	1362	1339	1373	1259	1454	1494	1544
ENSMUSG00000009551.2	6330409D20Rik	-0.231297	-0.518595	0.525695	0.473492	1	9.27	12	10.42	6	8	9	16	12
ENSMUSG00000009555.16	Cdk9	0.0463545	6.29287	0.799635	0.377626	1	1432	1731	1850	1889	1722	1982	1851	1891
ENSMUSG00000009563.16	Tor2a	0.0124721	4.95686	0.018142	0.893667	1	673	578.94	708.92	668	566	753.91	719.94	706.96
ENSMUSG00000009566.12	Fpgs	0.0976384	4.22049	1.52445	0.225598	1	379	414	425	408	393	409	420	470
ENSMUSG00000009569.14	Mrtfb	-0.0792761	6.2062	0.66996	0.41889	1	1208	1416	1663	1496	1461	1859	1782	1603
ENSMUSG00000009575.14	Cbx5	0.0283034	6.98109	0.180053	0.674059	1	2345	2595	2567	2833	2505	2844	2958	2851
ENSMUSG00000009580.15	Odam	0	-3.49827	0	1	1	0	0	0	0	0	0	0	0
ENSMUSG00000009585.18	Apobec3	-0.371551	6.59596	9.92724	0.00375976	0.305976	1509.84	1710.46	1779.67	1707.72	1602.67	2046.22	2865.47	2472.98
ENSMUSG00000009588.9	St6galnac1	-3.05122	-1.98621	14.4555	0.000582694	0.122512	0	0	0	1	2	6	5	9
ENSMUSG00000009596.9	Taf7l	0	-3.49827	0	1	1	0	0	0	0	0	0	0	0
ENSMUSG00000009614.16	Sardh	0.0526602	4.06326	0.363515	0.550649	1	345.02	350.98	395	427.28	298	397.53	435.01	366.79
ENSMUSG00000009621.18	Vav2	-0.0226995	5.99135	0.0657735	0.799172	1	1020	1373	1485	1459	1392	1647	1579	1449
ENSMUSG00000009628.14	Tex15	0.250413	3.31674	4.41956	0.0431781	0.833788	206	233	219	223	225	223	212	205
ENSMUSG00000009630.10	Ppp2cb	0.199265	6.21551	3.89939	0.0566512	0.918095	1733	1675	1660	1815	1606	1687	1607	1806
ENSMUSG00000009633.3	G0s2	0.131697	5.50126	0.383924	0.541641	1	775	933	696	1347	838	904	823	1140
ENSMUSG00000009640.11	Dmap1	0.0260439	4.21977	0.111398	0.740653	1	400	345	399	446	377	463	433	433
ENSMUSG00000009646.13	Pla2g12b	0.457381	-1.72831	0.687371	0.412969	1	7	6	2	7	6	4	3	7
ENSMUSG00000009647.13	Mcu	0.0556818	4.76463	0.501995	0.48356	1	495	543	662	616	556	578	627.99	689
ENSMUSG00000009654.4	Oit3	-0.471567	0.41329	5.53727	0.024675	0.692061	20	19	24	24	15	32	36	29
ENSMUSG00000009670.11	Tex11	0.880833	1.07572	20.2141	7.95949e-05	0.0373833	54	56	55	61	71	32	37	42
ENSMUSG00000009681.10	Bcr	-0.0213777	6.66285	0.0992921	0.754649	1	1668	2171	2346	2396	2079	2406	2523	2469
ENSMUSG00000009687.14	Fxyd5	0.104748	6.52518	1.03102	0.317323	1	1829	1946	1932	2060	1916	1929	1934	2341
ENSMUSG00000009731.4	Kcnd1	-0.0157707	1.30182	0.00632016	0.937112	1	38	65	54	57	42	73	51	53
ENSMUSG00000009733.9	Tfcp2	-0.172592	3.98202	2.42222	0.129088	1	198	345	368	340	341	414	392	419
ENSMUSG00000009734.18	Pou6f2	0	-3.3484	0	1	1	0	0	0	0	0	0	0	0
ENSMUSG00000009739.17	Pou6f1	-0.16673	5.63607	2.8114	0.10297	1	675	1010	1099	1055	930	1292	1087	1278
ENSMUSG00000009741.15	Ubp1	-0.125124	6.64182	1.68471	0.203227	1	1391.31	2067.49	2184.24	2279.16	2055.23	2460.5	2511.97	2453.51
ENSMUSG00000009772.15	Nuak2	-0.172815	4.61126	2.60159	0.116204	1	419	502	508	667	457	577	691	698
ENSMUSG00000009828.15	Ick	0.2656	5.9381	12.1669	0.00139035	0.191678	1453	1376	1382	1479	1443	1457	1258	1381
ENSMUSG00000009863.14	Sdhb	0.0939256	6.00165	0.608062	0.441832	1	1589	1297	1348	1414	1350	1480	1464	1596
ENSMUSG00000009876.13	Cox4i2	0.464573	5.17156	13.1594	0.00108654	0.169149	962	964	952	968	915	850	732	798
ENSMUSG00000009894.15	Snap47	0.107174	5.11934	1.45261	0.236613	1	728	709	837	782	685	814	795	778.37
ENSMUSG00000009900.7	Wnt3a	0.391956	4.25354	11.019	0.00219449	0.244005	435	396	515	593	415	361	419	448
ENSMUSG00000009905.5	Kdsr	0.0284791	5.34284	0.132822	0.71783	1	807	876	870	971	845	1071	877	997
ENSMUSG00000009907.17	Vps4b	0.069167	6.61058	1.4873	0.231211	1	1931.8	2013.84	2188.8	2397.67	2096.75	2267.75	2292.71	2396.71
ENSMUSG00000009927.9	Rps25	0.0453395	8.18567	0.0459079	0.832238	1	7290.56	5045.22	5498.45	5650.43	4920.02	6191.47	6178.76	6759.04
ENSMUSG00000009941.10	Nxf2	0.377621	-1.66453	0.364257	0.550245	1	2	9	1	7	4	2	7	3
ENSMUSG00000009995.17	Taz	0.00853517	6.0309	0.014644	0.904409	1	1065	1400	1449	1577	1350	1578	1529	1544
ENSMUSG00000010021.13	Kif19a	-0.151886	3.75645	1.38495	0.247611	1	202	267	315	303	245	308	307	397
ENSMUSG00000010025.19	Aldh3a2	0.139884	7.00735	4.72346	0.0369719	0.794481	2555	2764	3066	3140	2831	2805	3033	3106
ENSMUSG00000010044.12	Zmynd10	-0.178416	3.80266	2.35373	0.13444	1	256	254	283	309	255	326	347	381.93
ENSMUSG00000010045.2	Tmem115	0.102738	5.48192	1.00734	0.322786	1	984	938	1083	935	891	1103	1007	990
ENSMUSG00000010047.12	Hyal2	0.221147	6.55179	4.93497	0.0332335	0.768391	2380	2328	2519	2183	1988	2395	1968	2388
ENSMUSG00000010048.10	Ifrd2	0.296802	4.19325	12.8804	0.00105433	0.166949	398.54	430.06	411.54	464.2	458.52	386.22	392.54	433.51
ENSMUSG00000010051.15	Hyal1	-0.0437608	5.1827	0.189457	0.66618	1	664.54	875.6	832.66	873.32	693.52	957.8	888.49	936.47
ENSMUSG00000010054.4	Tusc2	-0.00576885	4.85096	0.00404755	0.949653	1	589.48	535.44	658.6	598.74	572.97	726.54	659.42	656.53
ENSMUSG00000010057.8	Nprl2	0.0158733	3.83863	0.0395602	0.843553	1	266	297	289	311	279	340	330	310
ENSMUSG00000010064.15	Slc38a3	-0.122671	-1.56875	0.0559121	0.814528	1	5	6	7	7	7	10	2	12
ENSMUSG00000010066.15	Cacna2d2	0.221822	-0.961974	0.299858	0.587627	1	5	10	10	8	8	9	8	7
ENSMUSG00000010067.13	Rassf1	-0.0855574	5.84362	1.78176	0.190997	1	1031.19	1175.31	1198.88	1280.15	1184.64	1509.69	1406.74	1359.71
ENSMUSG00000010080.15	Epn3	0.228515	6.03743	5.38439	0.0265916	0.711966	1476	1396	1682	1511	1294	1436	1398	1488
ENSMUSG00000010086.17	Rnf112	-0.175968	-1.55023	0.147291	0.703579	1	4	6	4	7	6	3	7	11
ENSMUSG00000010095.13	Slc3a2	-0.197804	7.57506	6.30657	0.0170604	0.596534	3212	3683	3813	4139	3746	5137	4437	5067
ENSMUSG00000010097.15	Nxf1	-0.128114	7.3205	0.550283	0.465437	1	1972	3668	3858	3703	3246	4173	4068	3983
ENSMUSG00000010110.17	Stx5a	0.0227927	6.62462	0.16556	0.686695	1	1878	2172	2253	2312	1948	2488	2249	2398.06
ENSMUSG00000010122.14	Slc47a1	0.240294	1.06479	0.957326	0.334923	1	39	43	52	67	56	51	33	65
ENSMUSG00000010136.14	Pifo	0.0408207	3.15168	0.0397003	0.843501	1	210	173	202	203	164	171	193	275
ENSMUSG00000010142.12	Tnfrsf13b	-0.140967	4.1104	1.64753	0.208164	1	293	299	309	300	302	387	368	387
ENSMUSG00000010154.7	Spire2	-0.0596723	2.07646	0.10266	0.750664	1	76	107	71	89	77	81	84	137
ENSMUSG00000010175.13	Prox1	-0.0431009	2.31154	0.0696722	0.793443	1	75	92	97	110	98	120	107	106
ENSMUSG00000010205.11	Raver1	0.0502197	6.44769	0.665489	0.420431	1	1676.61	2055.37	2194.64	2136.38	1707.68	2186.45	2162.71	2112.47
ENSMUSG00000010277.7	2610507B11Rik	-0.0753273	7.68929	1.20602	0.280007	1	3742	3731	4084	4173	3824	4668	4918	4582
ENSMUSG00000010290.7	AI597479	0.0219951	5.12188	0.0983139	0.75582	1	637	766	750	813	692	826	770	877
ENSMUSG00000010307.7	Tmem86a	0.306844	4.32066	7.22823	0.0111266	0.496495	469	453	559	524	445	468	446	446
ENSMUSG00000010311.15	Optc	0.313148	-0.16642	1.14115	0.2931	1	25	15	27	20	14	15	14	27
ENSMUSG00000010342.16	Tex14	0.676072	-0.36741	4.79151	0.0357211	0.787552	18	11	19	24	17	15	13	10
ENSMUSG00000010358.13	Ifi35	-0.216872	5.76952	6.99212	0.0123965	0.521593	1115.55	1250.86	1278.13	1405.27	1094.12	1446.09	1826.04	1622.21
ENSMUSG00000010362.9	Rdm1	0.0790515	4.18869	0.418973	0.521891	1	382	351	367	381	323	414	344	420
ENSMUSG00000010376.15	Nedd8	0.0899965	5.74888	0.33771	0.56636	1	1310	1075.99	1077.98	1193.97	949.96	1270.93	1139.97	1232.96
ENSMUSG00000010392.8	Gosr1	0.029113	5.97654	0.261268	0.612626	1	1117	1280	1364	1509	1390	1508	1452	1516
ENSMUSG00000010406.12	Mrpl52	0.0817095	4.64605	0.181953	0.67349	1	650	466	507	514	489	577	557	587
ENSMUSG00000010435.7	Spaca7	0	-3.41089	0	1	1	0	0	0	0	0	0	0	0
ENSMUSG00000010453.12	Kansl3	-0.0720858	6.46198	1.25758	0.270138	1	1524	1727	2111	2044	1808	2281	2182	2166
ENSMUSG00000010461.15	Eya4	-0.895847	-0.342168	6.72636	0.0140162	0.548968	6	11	13	19	10	14	30	31
ENSMUSG00000010476.14	Ebf3	0.434349	-1.62231	0.532864	0.470514	1	4	2	4	10	2	4	1	6
ENSMUSG00000010492.10	Uckl1os	-0.100323	3.19337	0.617868	0.437404	1	197.22	138.51	186.63	188.96	170.74	228.5	192.73	231.44
ENSMUSG00000010505.16	Myt1	-0.486688	-2.71746	0.197672	0.659575	1	1	1	1	1	0	1	2	1
ENSMUSG00000010517.7	Faf1	0.107499	5.1446	1.61689	0.212344	1	729	723	788	790	728	731	817	853
ENSMUSG00000010529.6	Gm266	0.119254	-2.81181	0.0172955	0.89624	1	2	1	3	2	0	2	2	1
ENSMUSG00000010538.14	Tsacc	0.304727	-0.179041	0.90058	0.349469	1	16	16	14	18	10	19	15	7
ENSMUSG00000010554.14	Mettl16	-0.049503	4.69822	0.424714	0.519071	1	424	543	557	540	561	634	590	641
ENSMUSG00000010592.9	Dazl	0.179693	-2.67787	0.0343299	0.854132	1	1	1	0	1	2	2	0	1
ENSMUSG00000010601.14	Apol7a	-0.928257	-0.205829	4.06694	0.0531055	0.897304	6.09	10.33	17	17.31	12.17	12.1	45.19	24.28
ENSMUSG00000010607.8	Pigyl	0.0952821	4.00674	0.359404	0.553552	1	436	285	317	349	315	403	343	359
ENSMUSG00000010608.15	Rbm25	-0.0859751	6.91687	0.267047	0.610032	1	1475.98	2499.98	2549.96	2884.94	2660.92	2775.9	3033.92	2914.98
ENSMUSG00000010609.15	Psen2	-0.0363354	5.11773	0.165592	0.686665	1	636	666	722	770	667	982	716	739
ENSMUSG00000010651.4	Acaa1b	0.989344	1.96584	7.53495	0.0110264	0.496017	65.6	99.9	107.13	137.36	120.79	99.65	33.1	49.35
ENSMUSG00000010660.3	Plcd1	0.178124	3.9471	3.83657	0.0585725	0.925846	303	356	374	419	325	372	359	344
ENSMUSG00000010663.5	Fads1	-0.0407617	7.33542	0.216094	0.645061	1	3174	3212	3460	3584	3375	3559	4053	4286
ENSMUSG00000010721.15	Lmbr1	0.0421941	4.3059	0.291398	0.592921	1	396	393	425	484	415	479	414	518
ENSMUSG00000010751.15	Tnfrsf22	-0.0355451	3.43577	0.103923	0.749189	1	166.92	273.57	240.87	287.44	196.5	272.73	253.26	289.13
ENSMUSG00000010755.17	Cars	-0.0573479	4.63307	0.566847	0.456809	1	438	498	598	576	544	623	607	663
ENSMUSG00000010760.5	Phlda2	0.366488	-0.307984	1.43647	0.23918	1	12	23	21	16	11	9	15	20
ENSMUSG00000010796.11	Asz1	0.122662	-2.56735	0.0240527	0.877688	1	1	2	2	2	1	3	0	2
ENSMUSG00000010797.6	Wnt2	-0.0203925	4.08548	0.0159139	0.900518	1	338	327	388	326	294	429	327	413
ENSMUSG00000010803.13	Gabra1	0.819273	-2.97422	0.323565	0.573411	1	0	0	0	0	3	0	1	0
ENSMUSG00000010825.17	Grid2ip	2.2334	-3.22374	1.91317	0.178712	1	0	0	0	1.16	1	0	0	0
ENSMUSG00000010830.8	Kdelr3	0.278802	4.00336	3.28665	0.0800943	1	417	408	459	436	303	402	394	349
ENSMUSG00000010841.13	Cfap97d1	0	-3.47582	0	1	1	0	0	0	0	0	0	0	0
ENSMUSG00000010911.12	Apip	-0.0189144	3.65777	0.0198532	0.888798	1	320	250	279	251	237	302	273	364
ENSMUSG00000010914.10	Pdhx	0.0713213	4.11208	0.768903	0.386845	1	318	382	374	419	380	410	373	441
ENSMUSG00000010936.11	Vac14	0.00114389	5.04163	0.000219342	0.988272	1	665	647	809	698	629	737	847	783
ENSMUSG00000011008.13	Mcoln2	-0.519107	1.85255	6.95958	0.0125835	0.523113	44	50	75	58	52	72	122	79
ENSMUSG00000011034.6	Slc5a1	-0.85373	3.33626	4.57992	0.0435267	0.837602	245	184	245	213	132	189	686	390
ENSMUSG00000011096.17	Akt1s1	0.203676	5.19723	5.5506	0.0245152	0.689181	869	726	839	845	734	855	742	807
ENSMUSG00000011114.18	Tbrg1	-0.0209526	6.33789	0.0721908	0.789832	1	1719.03	1655.48	1801.14	1736.71	1651.72	1934.33	2012.41	2042.7
ENSMUSG00000011118.4	Panx3	1.44487	-3.3687	1.02739	0.320381	1	0	1	0	0	0	0	0	0
ENSMUSG00000011148.14	Adssl1	0.11967	4.16794	0.883397	0.354047	1	366	368	413	397	464	453	339	483
ENSMUSG00000011154.17	Cfap161	-0.171911	3.33784	0.977792	0.330437	1	192	170	169	189	188	225	212	270
ENSMUSG00000011158.8	Brf1	-0.0720214	5.45775	0.49219	0.487831	1	634.98	869	921.99	1053.98	878.91	1158.99	967.96	1001
ENSMUSG00000011171.11	Vipr2	-0.130211	4.74422	0.651373	0.427012	1	345	545	644	641	439	798	532	615
ENSMUSG00000011179.8	Odc1	-0.0748389	6.54952	0.292811	0.593007	1	1903.59	1721.65	1837.25	2007.89	1819.93	1895.24	2134.95	2725.19
ENSMUSG00000011254.16	Thg1l	0.0182116	2.78939	0.016585	0.898305	1	131	119	140	140	113	158	121	158
ENSMUSG00000011256.16	Adam19	0.0810051	6.73016	0.414987	0.524698	1	1651	2432.93	2268.99	2657.08	2392	2576.22	2574.32	2211.9
ENSMUSG00000011257.19	Pabpc4	0.0845333	5.24053	1.2377	0.27389	1	714.6	770.92	791.54	878.5	777.68	870.31	811.56	866.61
ENSMUSG00000011263.16	Exoc3l2	-0.334763	1.61839	2.14689	0.152247	1	43	38	70	48	56	69	61	91
ENSMUSG00000011267.8	Zfp296	-0.148758	1.67943	0.939049	0.339515	1	55	60	50	61.51	54.1	64.75	66.75	82.92
ENSMUSG00000011305.11	Plin5	0.230141	1.824	1.80526	0.188172	1	75	63	93	89	63	81	58	85
ENSMUSG00000011306.7	Sugp1	-0.00896115	5.04336	0.0217708	0.883589	1	598	676	741	753	717	799	782	825.99
ENSMUSG00000011349.5	Dmrtc2	0	-3.30849	0	1	1	0	0	0	0	0	0	0	0
ENSMUSG00000011350.15	Gm5893	0	-3.49827	0	1	1	0	0	0	0	0	0	0	0
ENSMUSG00000011382.8	Dhdh	0.0129223	4.58304	0.0142955	0.905548	1	380.22	566.88	563	575.81	501	593	559.95	600.18
ENSMUSG00000011427.16	Zfp790	-0.185134	4.21209	4.65965	0.0381887	0.8026	294	425	369	428	348	483	482	486
ENSMUSG00000011463.5	Cpb1	0.190408	0.390788	0.705588	0.406909	1	29	38	29	26	29	39	35	17
ENSMUSG00000011486.14	Slc25a41	3.26058	-3.03828	4.06804	0.0526474	0.896409	0	1	1	1	2	0	0	0
ENSMUSG00000011589.9	Fsd1	0.420191	-2.72992	0.212398	0.647893	1	2	1	5	2	0	0	2	3
ENSMUSG00000011632.7	Pinlyp	-0.946347	-2.92844	1.1576	0.289706	1	1	0	1	1	2	1	3	3
ENSMUSG00000011658.16	Fuz	-0.0256316	4.9618	0.0991701	0.754795	1	524.34	667.1	753.59	711.79	611.59	824.93	685.24	767.15
ENSMUSG00000011751.16	Sptbn4	-0.409412	-0.802873	1.16156	0.288894	1	4	11	7	6	13.18	14.71	13	10
ENSMUSG00000011752.7	Pgam1	0.0802056	6.80067	0.708559	0.405933	1	2595.31	2366.88	2326.22	2414.5	2168.26	2457.23	2640.06	2663.67
ENSMUSG00000011831.16	Evi5	0.049815	5.85642	0.444014	0.509786	1	1002.54	1162.74	1240.19	1387.91	1305.73	1365.8	1330	1343.25
ENSMUSG00000011832.15	Evi5l	-0.0572208	4.71677	0.428626	0.517165	1	415.71	571.71	612.7	610.02	493.32	665.87	639.27	616.52
ENSMUSG00000011837.4	Snapc2	0.180468	4.10489	2.80563	0.10331	1	398	358	376	399	384	425	353	388
ENSMUSG00000011877.13	Git1	0.138988	6.88658	3.796	0.0598516	0.932119	2350	2790	3215	3060	2526	3035	2683	2951
ENSMUSG00000011884.13	Gltp	0.0313373	6.94922	0.193976	0.662476	1	2766	2634	2780	2809	2470	3122	2824	3136
ENSMUSG00000011958.17	Bnip2	0.141329	7.07957	5.81105	0.0216084	0.658001	2831.67	3013.78	3049.89	3376.79	3046.83	3192.87	3139.74	3216.83
ENSMUSG00000011960.12	Ccnt1	-0.142239	5.85883	3.10306	0.0873338	1	784.49	1116.61	1188.52	1256.28	1139.37	1355.51	1391.76	1387.59
ENSMUSG00000012017.4	Scarf2	0.123372	6.9372	2.26095	0.142108	1	2240	2767	2884	2975	2675	2681	2916	2922
ENSMUSG00000012042.9	4930579F01Rik	-3.09136	-3.23168	5.26576	0.0296683	0.737427	0	0	0	0	0	1	1	1
ENSMUSG00000012076.8	Brms1l	-0.0171907	4.67498	0.0548478	0.816268	1	436	528	573	626	532	635	630	601
ENSMUSG00000012114.17	Med15	-0.0194082	6.16416	0.067278	0.79694	1	1259.84	1537	1794.29	1633.54	1436.15	1633.79	1858.32	1822.55
ENSMUSG00000012117.13	Dhdds	0.118024	5.62227	3.53057	0.0690318	0.972281	979	1046	1149	1176	980	1176	1047	1149
ENSMUSG00000012123.17	Crybg2	0.0934701	3.19124	0.44822	0.507801	1	150	167	205	180	144	161	163	220
ENSMUSG00000012126.16	Ubxn11	-0.28668	4.05918	6.93215	0.0127434	0.527055	229.46	278.27	332.14	328.14	303.41	401.13	396.26	431.4
ENSMUSG00000012187.13	Mogat1	0.0358645	-1.84704	0.00416529	0.948927	1	4.82	3	5	4	7	10	3	3
ENSMUSG00000012211.13	Tex22	-3.09195	-3.1946	3.59802	0.0688952	0.971069	0	0	0	0	0	3	0	0
ENSMUSG00000012282.2	Wnt8a	0.381706	-3.07204	0.0979079	0.756432	1	0	1	0	2	1	2	0	0
ENSMUSG00000012296.16	Tjap1	-0.0285772	4.94829	0.126868	0.72395	1	526	675	779	742	615	852	780	693
ENSMUSG00000012350.15	Ehf	-0.215977	5.53737	5.68726	0.0229403	0.676622	900	908	935	994	851	1108	1426	1128
ENSMUSG00000012396.12	Nanog	-0.190445	-1.23722	0.199091	0.658346	1	6	4	13	9	4	3	16	9
ENSMUSG00000012405.16	Rpl15	0.0561674	8.02919	0.103603	0.75033	1	6682.92	4880.47	5047.12	5348.29	4642.37	5847.52	5732.96	6188.08
ENSMUSG00000012422.14	Tmem167	-0.0374868	5.4653	0.1509	0.700152	1	919	835	917	939	789	961	1083	1066
ENSMUSG00000012428.9	Steap4	-0.494125	4.81286	4.12773	0.0541109	0.903821	686	546	681	638	575	736	1380	915
ENSMUSG00000012429.9	Mplkip	-0.0705882	3.89814	0.557607	0.460471	1	254.66	236.67	273.56	336.35	247.86	328.79	330.79	311.35
ENSMUSG00000012443.4	Kif11	-0.190223	4.00226	0.483148	0.494032	1	292	321	343	379	205	290	463	449
ENSMUSG00000012483.4	Rpa3	0.0978753	2.90016	0.402701	0.530038	1	176	171	126	167	144	161	156	190
ENSMUSG00000012519.14	Mlkl	-0.249794	3.13193	2.57158	0.118252	1	161	210	185	222	150	209	332	213
ENSMUSG00000012520.10	Phox2b	1.17041	-3.21273	0.712722	0.406787	1	2	0	0	2	0	0	1	0
ENSMUSG00000012535.14	Tnpo3	-0.09205	6.18788	2.90247	0.0977691	1	1341.32	1449.07	1556.51	1642.05	1453.42	1802.31	1818.63	1825.23
ENSMUSG00000012609.19	Ttll5	-0.0496108	3.93668	0.312228	0.580058	1	282	330	351	328	255	372	344	382
ENSMUSG00000012640.16	Zfp715	-0.0329634	5.35572	0.148902	0.702044	1	582	848	923	894	804	1008	871	953
ENSMUSG00000012705.16	Retn	-0.0878101	1.5223	0.0465315	0.830993	1	25	48	71	60	50	46	40	98
ENSMUSG00000012777.14	Acp4	-2.60255	-3.1744	3.08177	0.090831	1	0	0	0	0	0	1.01	1.01	0
ENSMUSG00000012819.15	Cdh23	-0.386563	-0.185001	1.1206	0.297416	1	10	21	16	9	13	28	23	11
ENSMUSG00000012848.15	Rps5	0.0880219	8.55972	0.187722	0.668826	1	9151	6744	7020	7470	6537	7913	7671	8534
ENSMUSG00000012889.8	Podnl1	-0.627605	2.91362	5.42672	0.0281593	0.726426	90	90	120	66	79	154	157	163
ENSMUSG00000013033.16	Adgrl1	0.0470897	6.87642	0.106946	0.746297	1	1711.51	2621.18	3016.78	2988.62	2289.03	2909.15	2650.06	2755.81
ENSMUSG00000013076.17	Amotl1	0.0278645	6.98427	0.0948093	0.76007	1	2097	2688	2682	2971	2549	3118	2839	2762
ENSMUSG00000013083.8	2200002J24Rik	3.72989	-3.28826	5.47624	0.0290972	0.734668	2	1	0	0	4	0	0	0
ENSMUSG00000013089.15	Etv5	0.281008	7.51355	10.796	0.00240209	0.250708	3363.56	4504.88	4815.03	4779.29	4105.82	4413.35	3975.82	3742.86
ENSMUSG00000013091.5	Tmem190	-0.618093	-2.04613	0.853341	0.362261	1	4	3	4	0	2	8	4	2
ENSMUSG00000013150.15	Gfod2	0.0472751	4.34731	0.374642	0.544646	1	413	449	479	522	435	493	537	495
ENSMUSG00000013155.10	Enkd1	-0.218869	2.73188	3.69846	0.0630567	0.943994	112	140	123	157	121	151	185	185
ENSMUSG00000013158.6	4933405L10Rik	2.15298	-2.90007	2.30241	0.148266	1	1	0	0	1	0	0	0	0
ENSMUSG00000013160.7	Atp6v0d1	0.110176	6.59521	1.24784	0.271969	1	2334	2048	2181	2149	1918	2207	2302	2294
ENSMUSG00000013236.17	Ptprs	-0.1032	6.55476	0.733135	0.398977	1	1277	2038	2264	2118	1815	2348	2290	2324
ENSMUSG00000013275.9	Slc41a1	-0.108707	5.80025	2.42811	0.12864	1	915	1149	1198	1381	980	1429	1356	1356
ENSMUSG00000013338.16	Fer1l4	-0.75097	1.2375	5.39232	0.0274998	0.72261	36	35	51	34	37	41	73	110
ENSMUSG00000013353.10	4931406B18Rik	-1.13986	-3.30863	0.72651	0.400938	1	0	1	0	0	0	0	0	2
ENSMUSG00000013367.5	Iglon5	-0.160701	-0.309437	0.276728	0.602343	1	16	20	13	14	11	14	25	18
ENSMUSG00000013415.9	Igf2bp1	0.403084	1.19822	3.98123	0.0542527	0.905645	57	50	59	90	67	70	50	47
ENSMUSG00000013418.8	B4galnt2	-0.86339	-2.03977	1.4269	0.240718	1	0	1	1	3	2	2	5	2
ENSMUSG00000013419.7	Zfp651	0.120985	5.12392	2.06246	0.160304	1	625	770	831	975	705	898	750	805
ENSMUSG00000013465.19	Nelfb	0.0800138	6.35149	2.09568	0.157075	1	1558	1772	1922	2003	1745	1990	1908	1940
ENSMUSG00000013483.14	Card14	0.202757	-1.0275	0.23914	0.628036	1	5.25	6.45	10.15	18.41	10.83	6.46	13.42	10.2
ENSMUSG00000013495.15	Tmem175	0.167924	4.90996	5.89606	0.0207427	0.647668	577.13	659.65	685.54	696.94	684.3	651.74	654.27	715
ENSMUSG00000013523.13	Bcas1	-0.306205	2.72238	5.63438	0.0235362	0.679373	94.87	127	136.96	141.97	124	175.91	161	192
ENSMUSG00000013539.14	Tango2	0.127226	4.16328	2.06856	0.159704	1	392	381	422	433	413	464	401	421
ENSMUSG00000013562.12	4833413E03Rik	0.382451	-3.14048	0.100122	0.753929	1	0	2	2	0	0	1	1	0
ENSMUSG00000013584.5	Aldh1a2	-0.266269	4.17809	1.04211	0.318068	1	295	412	380	482	393	380	700	531
ENSMUSG00000013593.12	Ndufs2	0.10938	6.52192	2.03873	0.162658	1	2011	1950	2001	2190.27	1957	2188	2110	2157
ENSMUSG00000013611.14	Snx31	-0.954305	-1.32337	3.31811	0.0775227	1	4	2	5	4	2	11	3	9
ENSMUSG00000013622.15	Atraid	0.0955636	5.75325	0.7823	0.383017	1	1218.98	1102	1195.68	1250	1086	1337.72	1188.95	1249
ENSMUSG00000013629.16	Cad	-0.287181	5.17589	6.77568	0.0138018	0.545975	473	694	824	700	617	867	949	939
ENSMUSG00000013643.13	Lypd8	-1.31206	-2.64093	2.25456	0.142944	1	0	0	1	3	1	2	5	2
ENSMUSG00000013646.17	Sh3bp5l	0.178566	5.46968	7.57634	0.00950369	0.46304	868	1013	1055	1161	938	1113	954	981
ENSMUSG00000013653.2	1810065E05Rik	-0.36585	-3.38979	0.065499	0.800256	1	0	1	0	0	0	1	0	0
ENSMUSG00000013662.6	Atad1	0.129626	6.14573	4.28531	0.0462784	0.856359	1422	1481	1663	1649	1539	1635	1558	1679
ENSMUSG00000013663.7	Pten	0.136611	7.34742	4.25666	0.0469713	0.860277	3162.19	3512.61	3511.81	3819.6	3694.72	3743.93	3553.6	3775.56
ENSMUSG00000013668.9	4933402N03Rik	0	-3.49827	0	1	1	0	0	0	0	0	0	0	0
ENSMUSG00000013698.12	Pea15a	0.113633	7.90223	1.87852	0.17968	1	5201	5160	5538	5796	4885	5828	5479	5591
ENSMUSG00000013701.13	Timm23	0.0117235	5.40753	0.00531267	0.942482	1	1053.76	844.69	820.16	819.1	780.61	944.07	1014.57	1013.15
ENSMUSG00000013707.3	Tnfaip8l2	-0.15653	4.07017	1.16833	0.288279	1	334	335	339	316	304	397	442	412
ENSMUSG00000013736.16	Trnt1	0.0133104	4.77869	0.0339672	0.854895	1	502.89	517.81	559.78	599.26	549.02	606.19	645.41	605.65
ENSMUSG00000013766.11	Ly6g6e	-0.0104438	0.680405	0.00132519	0.971178	1	45.71	28.22	34.84	49.64	21	32.19	47.32	44.68
ENSMUSG00000013787.15	Ehmt2	-0.0314681	6.90777	0.18003	0.674079	1	1956	2555	2834	2787	2388	3073	2804	2871
ENSMUSG00000013822.7	Elof1	-0.150235	5.94178	0.995548	0.327899	1	1360	1048	1204	1301	984	1479	1405	1636
ENSMUSG00000013833.15	Med16	0.0128695	5.34304	0.0240765	0.877628	1	823	794	988	908	689	1004	904	950.8
ENSMUSG00000013846.10	St3gal1	-0.142956	7.7505	2.66332	0.112117	1	3309	4789	5105	4944	4102	5556	5753	5457
ENSMUSG00000013858.14	Tmem259	0.125803	6.70559	4.42019	0.043164	0.833788	2022.72	2235.83	2333.78	2330.87	2278.71	2345.84	2331.96	2381.93
ENSMUSG00000013878.18	Rnf170	0.0278462	4.63388	0.124918	0.72599	1	440.53	510.61	581.95	572.61	483.49	564.14	594.76	580.48
ENSMUSG00000013921.15	Clip3	0.0861427	3.02629	0.530995	0.471288	1	143	210	216	206	194	227	217	180
ENSMUSG00000013928.13	Thap8	0.246092	-2.15028	0.0867608	0.770166	1	1.1	2	4.22	2	0	1	4.28	0
ENSMUSG00000013936.12	Myl2	-0.365269	-2.92821	0.0612856	0.805997	1	0	0	0	0	1	0	1	0
ENSMUSG00000013973.12	Dedd	-0.0172392	4.94181	0.0640925	0.801699	1	575.9	643.07	723.63	761.61	617.63	769.77	766.68	766.16
ENSMUSG00000013974.3	Mcemp1	0.30481	3.97174	5.57528	0.0242223	0.686728	376	403	400	393	406	410	280	415
ENSMUSG00000013997.10	Nit1	0.208766	5.51996	9.64392	0.00386771	0.310648	942.1	1081.93	1030.37	1052.39	987.37	1097.23	933.32	1002.84
ENSMUSG00000014030.15	Pax5	-0.712559	4.59688	13.7122	0.00110575	0.171658	205	297	386	289	360	467	694	561
ENSMUSG00000014039.18	Prdm15	-0.208453	4.01061	5.01126	0.0319885	0.757367	249	331	318	325	316	402	441	376
ENSMUSG00000014074.17	Rnf168	0.00349141	4.99199	0.00315682	0.95553	1	640	669	681	704	604.58	766	761	736
ENSMUSG00000014075.15	Tctex1d2	0.127912	2.78052	0.932016	0.341305	1	128	124	141	127	127	126	131	151
ENSMUSG00000014077.13	Chp1	0.153814	7.42364	4.92943	0.0333259	0.769456	3627.71	3802.51	4142.47	4253.43	3739.4	4189.37	3807.01	4089.59
ENSMUSG00000014104.12	Sval2	0	-3.49827	0	1	1	0	0	0	0	0	0	0	0
ENSMUSG00000014158.12	Trpv4	-0.138743	3.40239	0.823109	0.370798	1	225	200	218	263	171	309	226	280
ENSMUSG00000014164.15	Klhl3	-0.556854	2.79479	9.76919	0.00366956	0.302185	73	113	109	126	114	201	169	168
ENSMUSG00000014177.10	Tvp23b	0.0784056	5.02443	0.965488	0.3329	1	748	684	691	744	640	754	736	802
ENSMUSG00000014195.15	Dnajc7	-0.0980907	6.84142	1.72268	0.198332	1	1784.3	2363.59	2543.56	2561.01	2294.47	2969.29	2663.28	2822.77
ENSMUSG00000014198.15	Zfp385c	-0.41544	-1.6475	0.736823	0.396823	1	2	7	1	9	5	4	8	10
ENSMUSG00000014226.10	Cacybp	0.0142887	5.32194	0.0119872	0.913596	1	778.42	843.98	735.34	786.97	725.04	797.72	946.44	898.12
ENSMUSG00000014232.14	Cluap1	0.086235	3.97048	0.844854	0.364629	1	280	286.08	337.48	385.98	325.08	372.86	309.7	360.06
ENSMUSG00000014243.5	Zswim7	0.0419136	1.40275	0.0424951	0.837935	1	55	37	54	55	49	63	60	44
ENSMUSG00000014245.8	Pigl	-0.121168	3.03774	0.641486	0.428856	1	126	158	169	158	170	214	184	185
ENSMUSG00000014294.4	Ndufa2	0.190439	5.4062	1.16334	0.291526	1	1137	807	820	932	766	885	845	984
ENSMUSG00000014301.13	Pam16	0.182986	3.25047	2.25786	0.142372	1	220.61	194.44	206.22	213.46	205.22	187.36	213.27	231.73
ENSMUSG00000014303.13	Glis2	0.312157	6.17193	12.2143	0.00136482	0.190529	1345.15	1836.38	2023.28	2135.06	1626.64	1683.6	1587.26	1655.27
ENSMUSG00000014313.15	Cox6c	0.135955	6.75415	0.6521	0.427291	1	3000.35	2053.41	2085.81	2468.23	2180.79	2436.14	2488.47	2527.15
ENSMUSG00000014329.14	Bicc1	0.10108	5.90073	1.73289	0.197039	1	1097	1394.83	1376.82	1521	1308	1475	1530.88	1267
ENSMUSG00000014349.7	Ube2z	0.0585267	6.85116	0.994288	0.325894	1	2463	2481	2673	2817	2406	2887	2783	2806
ENSMUSG00000014351.12	Gip	0	-3.45389	0	1	1	0	0	0	0	0	0	0	0
ENSMUSG00000014353.15	Tmem87b	0.0172054	5.89016	0.0543453	0.817096	1	984	1255	1310	1389	1242	1438	1327	1417
ENSMUSG00000014355.10	Anapc1	-0.0750775	6.70484	1.59893	0.214842	1	1812	2074	2364	2281	1957	2512	2522	2537
ENSMUSG00000014361.5	Mertk	0.230897	6.01131	2.98609	0.0954071	1	1297	1441	1708	1588	1773	1583	1472	1514
ENSMUSG00000014402.15	Tsg101	0.157172	5.7503	2.6617	0.112223	1	1241.74	1170.72	1151.43	1279.27	1107.34	1196.8	1189.59	1295.07
ENSMUSG00000014418.16	Hps5	-0.0740955	5.67124	0.505285	0.482148	1	753	995	1142	1181	1074	1250	1277	1171
ENSMUSG00000014426.9	Map3k4	0.0210795	5.26462	0.0812904	0.777324	1	604	811.89	855	913	795	924	869	888
ENSMUSG00000014444.17	Piezo1	-0.14682	7.50903	2.17792	0.149407	1	2564.31	3647.04	4192.54	3912.99	3518.35	4815.3	4461.13	4194.88
ENSMUSG00000014453.4	Blk	-0.549352	3.89271	11.178	0.00232123	0.248555	173	175	263	185	254	356	353	347
ENSMUSG00000014470.4	Rnf166	0.0777764	5.29422	1.1424	0.29284	1	786	812	840	899	726	919	883	843
ENSMUSG00000014496.8	Ankrd28	-0.0109059	4.8809	0.0206038	0.88673	1	427	577	576	670	604	650	626	692
ENSMUSG00000014498.9	Ankrd52	-0.251146	5.95671	1.51966	0.23018	1	659.53	1208.47	1349.11	1297.08	1093.92	1540.87	1597.25	1394.95
ENSMUSG00000014503.15	Pkd2l2	-0.204734	1.84418	1.42533	0.240971	1	45.31	52.32	76.59	84.17	80.04	94.4	91.05	80.58
ENSMUSG00000014504.16	Srp19	0.060467	4.88831	0.803936	0.376362	1	598	624	626	674	586	634	678	739
ENSMUSG00000014529.9	Tmbim7	0	-3.49827	0	1	1	0	0	0	0	0	0	0	0
ENSMUSG00000014542.3	Clec4f	0	-3.41066	0	1	1	0	0	0	0	0	0	0	0
ENSMUSG00000014543.14	Klra17	-0.0395823	-0.501861	0.0134078	0.908514	1	3	18	13	15	25	20	16	16
ENSMUSG00000014547.10	Wdfy2	-0.166663	5.59863	4.83083	0.0350196	0.781022	890	1011	1069	1027	932	1162	1393	1243
ENSMUSG00000014550.14	Rbsn	0.0530975	5.60198	0.80717	0.375415	1	913	1041	1100	1146	990	1170	1112	1150
ENSMUSG00000014551.8	Mrps25	0.215861	5.89833	5.87651	0.0209384	0.648913	1496	1498.36	1605.36	1521.25	1351.17	1531.94	1306.28	1596.78
ENSMUSG00000014554.13	Dguok	0.103477	4.78505	1.59347	0.215608	1	586	615	569	641	539	647	600	644
ENSMUSG00000014592.20	Camta1	0.0580079	3.84464	0.197582	0.659558	1	225	293	301	406	335	338	308	378
ENSMUSG00000014599.10	Csf1	-0.237611	6.05264	3.18616	0.0855842	1	927	1570	1421	1788	1295	1553	2206	1854
ENSMUSG00000014601.13	Strip1	-0.0365521	5.52968	0.345117	0.560857	1	770	956	1032	1109	937	1125	1148	1097
ENSMUSG00000014602.15	Kif1a	-0.917741	3.29316	29.3064	6.23415e-06	0.00548417	118	123	191	158	118	292	303	319
ENSMUSG00000014603.3	Alx3	1.43983	-3.32833	1.00231	0.326243	1	0	0	1	0	0	0	0	0
ENSMUSG00000014606.14	Slc25a11	0.121537	6.13838	1.41199	0.24314	1	1654.49	1413.53	1556.48	1621.62	1437.2	1646.15	1583.28	1645
ENSMUSG00000014609.16	Chrne	0.354821	-2.02233	0.44998	0.524097	1	1	4	5	3	4	4	2	3
ENSMUSG00000014633.15	Cmc2	-0.0537478	2.95235	0.108902	0.743467	1	199	154	152	159	113	202	182	174
ENSMUSG00000014668.15	Chfr	-0.146408	5.29116	3.11917	0.0865522	1	596.41	843.92	851.55	858.67	752.87	1017.9	1024.22	911.41
ENSMUSG00000014686.8	Ceacam16	-0.969241	-0.247839	6.45286	0.0159251	0.579124	4	7.64	7	6.4	6	7	16.76	18.28
ENSMUSG00000014704.10	Hoxa2	0.533249	2.5662	17.8489	0.000174841	0.0617189	147.81	143.11	171	151	135	142.86	99	113.59
ENSMUSG00000014725.16	Adam28	-0.0624717	4.02003	0.268547	0.607738	1	353	323	428	376	283	401	389	475
ENSMUSG00000014747.6	Ankrd53	-0.249402	-2.84796	0.0665884	0.798061	1	1	2	0	1	2	4	0	1
ENSMUSG00000014748.13	Tex261	0.0326199	6.75641	0.258861	0.614262	1	2220	2259	2437	2452	2188	2731	2448	2594
ENSMUSG00000014763.8	Fam120b	-0.00548154	5.67052	0.00764103	0.930867	1	863	973.88	1086	1092	1038	1131	1171	1177.82
ENSMUSG00000014767.17	Tbp	-0.0445419	4.6556	0.375319	0.544284	1	428.56	543.89	524.36	569.28	474.71	599.45	613.6	582.54
ENSMUSG00000014769.10	Psmb1	0.083699	6.60412	0.366837	0.549937	1	2387	1821	1975	2073	1791	2158	2154	2253
ENSMUSG00000014771.13	Pdcd2	0.136104	3.25406	1.0708	0.308229	1	209.44	166.11	208.64	193.72	234.29	238.55	224.4	172.46
ENSMUSG00000014773.13	Dll1	-0.585195	5.48195	25.0967	2.31361e-05	0.0149096	605	944	1025	980	857	1642	1341	1534
ENSMUSG00000014776.7	Nol3	0.135146	4.14778	1.39141	0.246534	1	303.64	367.8	422.15	449.13	384.71	360.33	378.14	463.04
ENSMUSG00000014778.10	Fhod1	0.0759181	7.15322	0.162014	0.690982	1	1939	3374	3694.87	3853	3200.77	3781.78	3286.75	3285.54
ENSMUSG00000014782.16	Plekhg4	0.737663	-0.622697	3.47204	0.071262	0.980247	9	15	17	12	13	6	7	14
ENSMUSG00000014786.8	Slc9a5	0.0247809	3.51303	0.0150002	0.903443	1	119	246	240	333	217	258	254	257
ENSMUSG00000014791.10	Elmo3	0.133573	4.80993	3.61359	0.0660015	0.956805	584.48	602.58	626	692	571	635	659	632
ENSMUSG00000014813.9	Stc1	0.00867219	3.06955	0.00344104	0.953574	1	131.94	223.92	159.95	208	142	194	180	215
ENSMUSG00000014837.15	4931428F04Rik	-0.215231	2.24752	1.31571	0.259547	1	53.36	100.2	85.85	117.87	75.29	115.67	117.86	107.96
ENSMUSG00000014846.12	Tppp3	0.323913	8.4091	3.06132	0.0930738	1	7774	7172	7751	8777	7384	7154	5732	8524
ENSMUSG00000014850.15	Msh3	-0.0634768	3.69381	0.433618	0.514751	1	222.19	231.21	269.67	283.84	258.64	303.82	302.14	301.24
ENSMUSG00000014852.16	Adamts13	-0.00755959	-0.837545	0.000219875	0.988264	1	4	15	14	18	9	14	8	19
ENSMUSG00000014856.12	Tmem208	0.114641	4.82724	1.70095	0.201115	1	630	591	601.13	613	611.23	680.22	631.25	630.46
ENSMUSG00000014859.9	E2f4	0.0988468	5.63303	2.65771	0.112482	1	985	1087	1183	1131	972	1142	1155	1138
ENSMUSG00000014867.9	Surf4	0.0497181	7.66872	0.372977	0.545536	1	4688.9	4321.88	4715.89	4631.89	4173	4733	5130	5150
ENSMUSG00000014873.15	Surf2	-0.118396	4.49881	2.55264	0.119567	1	353.59	498.68	472.06	515.41	435.64	583.63	543.53	563.43
ENSMUSG00000014905.4	Dnajb9	0.14459	5.74943	2.62389	0.114708	1	1189.98	1126	1140.99	1206	1088	1206	1119	1264.97
ENSMUSG00000014907.10	Naf1	-0.0843581	3.88311	0.939845	0.339313	1	250.74	296.86	316.85	323.58	322.84	349.81	336.61	413.91
ENSMUSG00000014932.15	Yes1	0.0631555	5.35896	0.868065	0.358204	1	673.32	826.28	873.5	955.47	844.73	943.16	887.51	904.58
ENSMUSG00000014956.15	Ppp1cb	0.156904	7.81177	5.30408	0.027663	0.723285	3984	4596	5032	5850	4777	4695	4788	5398
ENSMUSG00000014959.12	Gorasp2	0.0683503	6.75129	0.61124	0.43985	1	2395.6	2218.53	2551.07	2354.3	2193.49	2577.6	2440.3	2685.51
ENSMUSG00000014980.14	Tsen15	-0.00185215	3.76822	0.000452514	0.983155	1	263.66	300.64	285.54	323.76	304.48	354.29	339.2	323.37
ENSMUSG00000015001.17	Oc90	0	-3.47594	0	1	1	0	0	0	0	0	0	0	0
ENSMUSG00000015002.18	Efr3a	-0.042839	6.15421	0.549405	0.463761	1	1309	1432	1522	1512	1447	1647	1759	1707
ENSMUSG00000015013.9	Trappc2l	0.24268	4.0788	3.37588	0.0751041	0.999122	417	329	344	380	332	335	348	370
ENSMUSG00000015016.8	Acsf3	-0.0831133	3.87699	0.91115	0.346694	1	273	259	324	331	275	380	355	327
ENSMUSG00000015023.7	Ddx19a	-0.0136771	5.39418	0.0477454	0.828369	1	864.61	879.18	902.4	952.56	845.85	1026.16	1008.95	1053.25
ENSMUSG00000015027.11	Galns	0.0230239	4.21837	0.0717213	0.7905	1	406	373	412	438	333	391	472	465
ENSMUSG00000015053.14	Gata2	-0.00961669	7.34324	0.008443	0.927344	1	3229	3641	3776	3547	3578	4104	3723	4494
ENSMUSG00000015083.11	C8g	-0.147548	0.0757432	0.348506	0.558949	1	25	13	16	21	19	25	24	23
ENSMUSG00000015085.8	Entpd2	-0.292691	3.41886	4.45807	0.0423317	0.825882	207	206	215	225	187	346	271	259
ENSMUSG00000015087.14	Rabl6	0.0527582	6.15894	0.89597	0.350689	1	1381	1530	1690	1615	1457	1679	1664	1737
ENSMUSG00000015090.13	Ptgds	0.290573	-1.61532	0.217154	0.644254	1	6	8	2	7	2	2	5	7
ENSMUSG00000015092.9	Edf1	0.126029	6.20593	0.849143	0.36511	1	1838.06	1489.38	1580.52	1607.89	1410.1	1707.23	1700.11	1616.03
ENSMUSG00000015093.15	Clic3	0.308153	6.66487	3.34764	0.0797361	1	2598	1995	2246	2567	2336	2020	2006	2535
ENSMUSG00000015094.16	Npdc1	0.0693826	6.21173	0.764352	0.388238	1	1637	1666	1712	1743	1571	1681	1743	2047
ENSMUSG00000015095.12	Fbxw5	0.0949827	5.85118	2.31193	0.137833	1	1099	1248	1395	1355	1188	1380	1302	1354
ENSMUSG00000015112.15	Slc25a13	0.056656	3.01565	0.217033	0.644346	1	163	159	189	208	152	221	170	183
ENSMUSG00000015120.15	Ube2i	0.0520422	7.21131	0.831065	0.368524	1	2743.86	3105.71	3292.44	3233.28	2956.54	3390.65	3343.26	3423.64
ENSMUSG00000015126.9	Tsr3	0.0924738	3.62087	0.604789	0.442252	1	273.75	222.65	244.33	268.25	300.71	296.59	278.99	272.97
ENSMUSG00000015127.14	Unkl	0.0296906	5.36933	0.0905246	0.765384	1	652.78	893.29	1004.36	976.53	860.38	1051.62	905.04	980.65
ENSMUSG00000015133.17	Lrrk1	-0.0769533	6.93505	1.10584	0.300568	1	1857	2372	2644	2874	2440	2970	2943	2866
ENSMUSG00000015134.15	Aldh1a3	-0.876783	2.11954	3.31485	0.0819513	1	120	52	112	74	72	54	278	215
ENSMUSG00000015143.15	Actn1	-0.0180573	7.44938	0.070763	0.791871	1	3145.84	3785.71	4409.8	4154.95	3510.76	3942.56	4526.42	4703.82
ENSMUSG00000015149.14	Sirt2	0.0591803	6.332	0.588413	0.448443	1	1708	1608	1828	1785	1544	2005	1716	1879
ENSMUSG00000015165.16	Hnrnpl	-0.0439306	7.66706	0.252313	0.61876	1	3208	4399	4583.93	4808	3916	4966	4942	4818
ENSMUSG00000015176.11	Nolc1	-0.114531	5.54202	2.65263	0.112813	1	713	964	1016	965	971	1135	1131	1168
ENSMUSG00000015189.12	Casd1	0.18289	5.74829	7.30262	0.0107562	0.489972	1037	1247	1286	1294	1234	1337	1160	1190
ENSMUSG00000015202.13	Cnksr3	-0.21189	4.17411	4.39785	0.0436635	0.838849	287	300	408	407	320	490	471	401
ENSMUSG00000015214.14	Mtmr1	-0.029868	5.24039	0.196968	0.660053	1	604	693	814	803	760	830	872	868
ENSMUSG00000015217.11	Hmgb3	0.0133944	4.24769	0.0139357	0.906738	1	419.5	397.53	400.01	449.43	374.17	397.74	538.93	454.49
ENSMUSG00000015222.17	Map2	-0.110105	3.3172	1.12726	0.296006	1	173	206	202	189	180	220	244	241
ENSMUSG00000015224.10	Cyp2j9	-0.0792853	2.94583	0.42267	0.520072	1	138	176	175	182	132	221	174	186
ENSMUSG00000015242.14	Nipsnap3a	0	-3.49827	0	1	1	0	0	0	0	0	0	0	0
ENSMUSG00000015243.4	Abca1	0.154079	6.3237	1.2762	0.268713	1	1345	1393	1500	1719	1976	1794	1524	1587
ENSMUSG00000015247.10	Nipsnap3b	0.0142538	4.30084	0.0272483	0.869887	1	422	412	411	465	386	425	518	485
ENSMUSG00000015289.4	Lage3	0.100188	3.9982	0.859026	0.360687	1	356	312	330	373	276	352	349	357
ENSMUSG00000015290.15	Ubl4a	0.0996686	5.53863	1.83565	0.184591	1	1020	1031	1014	1137	920	1069	1116.21	1103.55
ENSMUSG00000015291.10	Gdi1	0.03605	7.55473	0.131722	0.718949	1	2892	4499	4493	4819.99	3995	4524	4552.96	4692.99
ENSMUSG00000015305.6	Sash1	-0.140232	7.26626	2.08922	0.157696	1	2523	2895.99	3362	3345.99	3066.99	3925	3782.94	3761.98
ENSMUSG00000015312.9	Gadd45b	0.153985	6.06169	3.30899	0.0779129	1	1364	1293	1494	1711	1514	1591	1419	1544
ENSMUSG00000015314.10	Slamf6	-0.401281	3.87856	7.51411	0.00995668	0.473656	149	206	241	195	222	265	323	329
ENSMUSG00000015316.11	Slamf1	-0.626616	1.95329	6.3484	0.016924	0.594192	45	61	51	51	49	76	99	98
ENSMUSG00000015335.16	Zdhhc12	0.10016	3.68531	0.951977	0.336258	1	263	258	284	301	295	320	290	289
ENSMUSG00000015337.5	Endog	0.127585	3.53359	1.23634	0.274149	1	229.69	223.95	210.86	275.88	263.83	219.53	253.98	285.87
ENSMUSG00000015340.10	Cybb	-0.169314	7.00308	2.16833	0.151308	1	1742	2806	2675	2814	2238	2824	3361	3230
ENSMUSG00000015341.17	Golga7	0.0984446	6.51571	2.0165	0.164901	1	1813.96	1884.68	1974.58	2147.16	1941.41	2132.73	2016.13	2120.31
ENSMUSG00000015342.6	Xk	-0.610526	1.88763	11.6395	0.00171166	0.218074	44	57	59	61	59	74	120	99
ENSMUSG00000015354.8	Pcolce2	0.170712	7.93826	1.14309	0.295252	1	5316	5544	5781	5559	5034	6597	4685	5385
ENSMUSG00000015355.13	Cd48	-0.204302	4.8842	2.17006	0.151892	1	552	576	584	599	470	711	754	738
ENSMUSG00000015357.10	Clpx	0.0946176	5.18139	2.0915	0.157477	1	710	780	834	843	800	848	829	876
ENSMUSG00000015363.13	Trabd	-0.00263667	6.04874	0.00216229	0.963189	1	1238	1378	1447	1493	1323	1577	1511	1646
ENSMUSG00000015365.15	Mov10l1	0.0898133	-1.76991	0.0231532	0.879979	1	5	7	6	8	2	7	2	9
ENSMUSG00000015377.10	Dennd6b	-0.0426603	3.95156	0.0683582	0.795633	1	187	295	352	338	353	382	332	358
ENSMUSG00000015396.4	Cd83	-0.726685	5.02438	12.3731	0.00183825	0.224855	531	581	542	524	395	743	1266	918
ENSMUSG00000015401.12	Cltrn	0.774175	-2.53332	0.613214	0.43912	1	0	2	4	2	0	1	2	0
ENSMUSG00000015405.15	Ace2	0.097472	3.97766	0.441677	0.511273	1	390	302	369	335	305	356	344	399
ENSMUSG00000015437.5	Gzmb	-0.698654	3.11038	4.11469	0.0543491	0.905758	139	150	124	134	107	228	221	284
ENSMUSG00000015441.4	Gzmf	0	-3.45398	0	1	1	0	0	0	0	0	0	0	0
ENSMUSG00000015443.9	Gzmn	0	-3.49827	0	1	1	0	0	0	0	0	0	0	0
ENSMUSG00000015451.16	C4a	-0.619667	0.657662	5.66175	0.0232256	0.677637	12.01	32.36	24.7	29.12	25.69	39.17	45.88	45.02
ENSMUSG00000015452.14	Ager	0.217227	10.6045	4.1803	0.0488752	0.870932	34484	32602	34694	39751	33792	30979	33686	39197
ENSMUSG00000015461.15	Atf6b	0.0620886	5.83636	0.943828	0.338306	1	1126	1258	1401	1305	1081	1270	1448	1336
ENSMUSG00000015467.14	Egfl8	-0.046093	1.31798	0.0474193	0.828946	1	28.04	53	58	63	46	56.07	62	56
ENSMUSG00000015468.14	Notch4	0.228183	7.31426	4.44623	0.0428758	0.829236	3142	4152	4797	4378	4176	3843	3864	4355
ENSMUSG00000015474.16	Ppt2	0.10932	4.97755	2.17391	0.14977	1	638	714	760	693	673	760.31	651	808
ENSMUSG00000015476.6	Prrt1	-0.107619	2.03752	0.283154	0.598178	1	64	71	86	61	79	103	72	93
ENSMUSG00000015478.13	Rnf5	0.072361	4.67558	0.821871	0.371153	1	552.48	536.36	511.82	635.51	523.98	607.89	576.79	622.7
ENSMUSG00000015484.3	Fam163a	0.0302905	-2.23144	0.00156978	0.968633	1	2	3	2	6	2	8	1	1
ENSMUSG00000015488.14	Cacfd1	-0.0736241	5.39121	0.428287	0.517624	1	617	970	1015	1054	936	1125	1125	1045
ENSMUSG00000015501.10	Hivep2	-0.0584271	5.80931	0.629625	0.433116	1	809.98	1012.35	1142.9	1280.56	1021.81	1234.17	1166.42	1347.25
ENSMUSG00000015519.12	2310057J18Rik	0	-3.49827	0	1	1	0	0	0	0	0	0	0	0
ENSMUSG00000015522.18	Arnt	-0.0364684	6.35826	0.200704	0.657057	1	1346	1750	1920	2054	1796	2112	2076	2025
ENSMUSG00000015533.9	Itga2	-0.185183	4.95403	4.21464	0.0480086	0.868275	381	666	643	612	542	752	706	750
ENSMUSG00000015536.14	Mocs2	0.157413	5.13155	4.40903	0.0434128	0.836779	765	740	756	816	751	775	784	806
ENSMUSG00000015542.17	Nat9	0.0743687	4.14742	0.667914	0.419594	1	352	326	427	424	361	397	363	473
ENSMUSG00000015568.16	Lpl	0.126167	7.70858	0.687885	0.414633	1	4146	5023	4515	5847	5985	5735	4931	5397
ENSMUSG00000015575.15	Atp6v0e	0.072857	6.15088	0.281692	0.600026	1	1781	1407	1465	1488	1439	1732	1571	1693
ENSMUSG00000015579.5	Nkx2-5	0.691471	-1.77639	1.47718	0.232771	1	3	3	6	8	11	4	3	6
ENSMUSG00000015597.17	Zfp318	-0.17539	5.22323	3.74832	0.0613949	0.939055	505	702	799	709	680	866	880	876
ENSMUSG00000015599.9	Ttbk1	-0.56495	-0.039591	2.48932	0.124084	1	11	11	16	13	6	22	12	24
ENSMUSG00000015605.6	Srf	-0.116054	5.62138	1.75299	0.194527	1	768	937	1106	1157	828	1161	1187	1199
ENSMUSG00000015619.10	Gata3	0.0754172	3.72377	0.224109	0.63932	1	259	273.97	259	336	304	271	363	299
ENSMUSG00000015627.5	Gata5	0.289992	3.6604	4.10887	0.0507336	0.882796	213	323	316.96	389.97	277	270.94	290.94	285
ENSMUSG00000015647.9	Lama5	-1.02025	7.6095	46.6468	3.49917e-07	0.000538688	1551	2197	2484	2636	2272	5474	5215	4706
ENSMUSG00000015652.9	Steap1	0.00909307	0.749356	0.0013155	0.971284	1	42	43	35	40	34	36	48	49
ENSMUSG00000015653.13	Steap2	-0.0366268	4.42833	0.106389	0.746336	1	426	418	472	496	456	480	628	489
ENSMUSG00000015656.17	Hspa8	-0.132649	10.307	1.5029	0.228833	1	23226.9	28908.2	26225.5	27271.2	23484.8	29264	34329	33663.4
ENSMUSG00000015659.12	Serac1	-0.201172	2.60587	1.63763	0.209503	1	67.41	125.68	124.69	119.93	104.87	163.97	140.24	121
ENSMUSG00000015665.8	Awat1	-2.01791	-2.41152	5.10969	0.0304571	0.74331	1	0	1	2	1	3	11	1
ENSMUSG00000015668.13	Pdzd11	0.0479507	4.52462	0.176328	0.677247	1	575.27	467.12	433	527.26	433.46	535.86	543.96	550.33
ENSMUSG00000015671.11	Psma2	0.0899673	6.19575	0.632714	0.432529	1	1788.94	1503	1553.98	1640	1477	1659	1693	1823
ENSMUSG00000015672.4	Mrpl32	0.133417	4.34085	1.60402	0.21413	1	467	433	400	469	417	482	427	467
ENSMUSG00000015697.14	Setdb1	-0.138274	5.70354	2.08905	0.157712	1	743.91	1115.88	1144.74	1181.66	1018.15	1342.93	1305.79	1261.32
ENSMUSG00000015702.13	Anxa9	0.128145	2.2715	0.732928	0.39806	1	105	89	120	109	105	121	116	95
ENSMUSG00000015709.9	Arnt2	-1.23045	1.33773	24.5076	2.09399e-05	0.0136531	16	20	35	25.42	19	64	69	52
ENSMUSG00000015711.8	Prune1	0.172151	4.84563	5.23629	0.0286043	0.73154	517	641	712	733	625	687	598	676
ENSMUSG00000015714.11	Cers2	0.121895	7.92407	2.8568	0.100339	1	5149	5354	5573	5478	5015	5646	5531	5634
ENSMUSG00000015721.18	Nlrp5	1.45329	-3.43207	1.00294	0.329011	1	1	0	0	0	0	0	0	0
ENSMUSG00000015733.13	Capza2	0.00535639	7.33103	0.00475556	0.945434	1	3507	3478	3563	3737	3212	3647	4230	4127
ENSMUSG00000015745.9	Plekho1	-0.0711356	5.88022	0.399919	0.531812	1	1218	1376	1221	1201	1032	1497	1558	1321
ENSMUSG00000015747.5	Vps45	-0.0493763	3.60898	0.227489	0.63651	1	222	267	284	256	238	284	277	340
ENSMUSG00000015748.13	Prpf3	-0.0626898	4.61099	0.726425	0.400139	1	400	494	538	523	515	619	594	555
ENSMUSG00000015749.12	Anp32e	0.0438609	6.73668	0.420273	0.521251	1	1910	2238	2314	2559	2138	2422	2335	2666
ENSMUSG00000015750.15	Aph1a	0.0962314	7.10205	1.15946	0.289325	1	3218.24	3009.14	3251.03	3206.19	2804.27	3333.03	3156.08	3504.92
ENSMUSG00000015755.16	Tab2	0.00195287	7.04085	0.00121779	0.972371	1	2342	2828	2868	3108	2693	3349	3075	3048
ENSMUSG00000015757.10	Ppil4	-0.0615555	5.50401	0.921404	0.344031	1	757	907	964	975	947	1102	1054	1102
ENSMUSG00000015759.11	Cnih1	0.11914	5.80991	1.81033	0.187568	1	1247.97	1203.97	1188.99	1295.92	1125.96	1269.98	1257.95	1320.98
ENSMUSG00000015766.14	Eps8	-0.144293	5.44188	3.53918	0.0687104	0.970175	759	917	962	961	852	1050	1233	1088
ENSMUSG00000015776.12	Med22	0.0389544	5.92791	0.451054	0.506472	1	1165	1283	1379	1474	1277	1499	1456	1437
ENSMUSG00000015787.15	Abo	0	-3.47598	0	1	1	0	0	0	0	0	0	0	0
ENSMUSG00000015790.16	Surf1	0.0338027	5.11635	0.125211	0.725683	1	748.51	729.44	672.05	757.69	659.36	816.37	739.47	849.57
ENSMUSG00000015804.14	Med28	0.144274	5.87022	1.03523	0.318267	1	1440	1147	1233	1267	1218	1294	1308	1347
ENSMUSG00000015806.12	Qdpr	0.164857	5.49154	1.76521	0.194376	1	1032	877.4	974	1030.5	1017	968	998	1071
ENSMUSG00000015812.8	Gnrh1	-0.227558	-0.834654	0.510482	0.479914	1	7	6	13	14	10	12	14	14
ENSMUSG00000015829.13	Tnr	-0.00835644	-0.408606	0.000263813	0.987146	1	3	8	13	10	14	6	11	16
ENSMUSG00000015837.15	Sqstm1	0.0450943	8.51893	0.292593	0.592167	1	7397.95	7536.78	8222.25	8565.91	7285.69	9440.89	7777.17	8776.18
ENSMUSG00000015839.6	Nfe2l2	-0.00900139	7.49571	0.0257073	0.873587	1	3145	3934	4040	4448	3633	4394	4236	4596
ENSMUSG00000015843.10	Rxrg	-0.260856	0.0840107	1.11264	0.299109	1	12	14	16	24	23	29	23	21
ENSMUSG00000015846.15	Rxra	0.116013	6.84589	2.20531	0.146951	1	2309	2455	2820	2879	2427	2984	2467	2708
ENSMUSG00000015850.11	Adamtsl4	0.0300624	6.43449	0.0487352	0.826978	1	1626	2097	2415	2113	1742	2507	2155	2028
ENSMUSG00000015852.13	Fcrls	-0.422331	3.71627	3.63348	0.0684899	0.970171	327	328	304	300	254	352	709	333
ENSMUSG00000015854.7	Cd5l	-0.0796004	-0.67465	0.0107506	0.918257	1	5	7	9	7	12	7	14	8
ENSMUSG00000015869.16	Prpsap1	0.151367	5.44885	5.95255	0.0201883	0.641544	911	977	978	986	982	1055	940	1003
ENSMUSG00000015879.8	Fam184b	0.437786	-2.29788	0.309854	0.581496	1	3	1	3	2	3	0	3	3
ENSMUSG00000015880.13	Ncapg	-0.0737499	2.71668	0.0722794	0.790218	1	125.84	123.25	115.97	139.47	101.17	114.1	165.67	158.73
ENSMUSG00000015882.18	Lcorl	0.0515071	3.7732	0.21972	0.642311	1	191.16	251.75	291.03	329.53	241.83	266.9	300.33	291.27
ENSMUSG00000015889.8	Lta4h	0.0368892	5.99977	0.293402	0.591658	1	1309	1417	1460	1326	1212	1558	1487	1467
ENSMUSG00000015890.2	Amdhd1	0.224983	-1.89065	0.153294	0.697904	1	6	2	3	3	3	5	3	2
ENSMUSG00000015932.8	Dstn	0.238506	8.85044	6.98976	0.01241	0.521593	10756	9749	10476	12001	10094	9422	10087	11491
ENSMUSG00000015937.15	H2afy	0.0235462	6.5933	0.0947806	0.760105	1	1975.82	2042.3	2084.32	2115.04	1894.74	2168.5	2289.04	2393.51
ENSMUSG00000015942.9	Gtf2ird2	0.0149981	3.72405	0.0222407	0.882349	1	196	267.33	330.2	323.43	269.44	306.28	316.23	313.12
ENSMUSG00000015943.11	Bola1	0.0255294	3.23322	0.0259296	0.873046	1	219	158	190	176	181	193	195	241
ENSMUSG00000015944.9	Castor2	-0.0446312	5.47239	0.337771	0.565036	1	722	900	1016	989	792	1059	1056	1001
ENSMUSG00000015947.10	Fcgr1	-0.289267	2.87669	2.35435	0.134993	1	149	206	179	212	144	231	302	210
ENSMUSG00000015950.13	Ncf1	-0.232684	5.89421	4.61336	0.0394872	0.809692	974	1266.67	1306.8	1032.57	1060.56	1447.72	1714.77	1386.88
ENSMUSG00000015957.12	Wnt11	-0.215643	3.30908	4.19937	0.0483919	0.869621	152	171	210	213	178	258	208	269
ENSMUSG00000015961.8	Adss	0.0833157	6.15383	1.62753	0.21088	1	1457	1517	1629	1619	1490	1603	1719	1684
ENSMUSG00000015962.5	1700016C15Rik	-0.0233913	-1.88287	0.000977046	0.975251	1	1	3	0	7	2	3	3	3
ENSMUSG00000015966.17	Il17rb	-0.345747	1.02978	1.8037	0.188356	1	29	31	37	38	36	38	62	49
ENSMUSG00000015968.18	Cacna1d	-0.014608	5.59878	0.0242067	0.8773	1	743.36	911.25	1115.26	1114.99	871.21	1069.75	1104.53	1105.03
ENSMUSG00000015970.19	Chdh	-0.086117	1.97627	0.291258	0.59301	1	64.64	84.75	104.74	71.01	72.79	102.22	90.44	96.97
ENSMUSG00000015971.5	Actr8	0.0838965	5.21774	1.65198	0.207566	1	708	805	880	881	770	843	852	923
ENSMUSG00000015980.14	Lrrc27	-0.585741	1.89112	15.4773	0.000401465	0.100223	49	52	60	54	57	83	95.93	101.96
ENSMUSG00000015981.12	Stk32c	-0.225878	1.44855	1.34987	0.253568	1	32	52	52	48	35	74	51	50
ENSMUSG00000015994.10	Fnta	0.0802833	5.93848	0.94507	0.337993	1	1243	1234	1332	1410	1294	1487	1298	1455
ENSMUSG00000016018.4	Mtrex	0.0322702	5.8804	0.163765	0.688304	1	961.24	1270.71	1429.08	1386.01	1278.5	1345.71	1422.29	1462.65
ENSMUSG00000016024.9	Lbp	-0.103354	6.00717	1.19938	0.281311	1	1363	1396	1488	1507	1328	1908	1732	1590
ENSMUSG00000016028.10	Celsr1	-0.173778	5.71824	5.39423	0.0264635	0.711624	882	860	1047	994	784	1092	1231	1213
ENSMUSG00000016087.13	Fli1	-0.487354	5.20812	41.3295	2.64798e-07	0.000431628	537	697	756	706	643	1073	998	1137
ENSMUSG00000016128.14	Stard13	-0.0131173	7.19948	0.0183992	0.892921	1	2313	3086	3400.84	3596.9	2751	3531	3362	3538
ENSMUSG00000016150.15	Tenm1	-0.359217	-3.30855	0.0569408	0.81312	1	1	0	0	0	0	0	1	0
ENSMUSG00000016179.11	Camk1g	-0.83686	-1.77975	1.72477	0.198066	1	1	0	2	3	6	4	7	4
ENSMUSG00000016181.9	Utp25	-0.152336	3.91302	3.30272	0.0781821	1	232	316	318	323	295	404	379	346
ENSMUSG00000016194.14	Hsd11b1	0.172805	7.65459	2.63246	0.114224	1	4579	4274	4199	4462	4735	4943	4044	4666
ENSMUSG00000016200.14	Syt14	-0.583888	0.420737	5.60113	0.0239195	0.685399	18	11	17	21	21	28	27	36
ENSMUSG00000016206.6	H2-M3	-0.0912432	4.59257	0.798667	0.377912	1	490	506	550	568	460	622	569	694
ENSMUSG00000016239.11	Lonrf3	-0.157513	1.71046	0.630681	0.432734	1	63	43	42	57	54	57	68	75
ENSMUSG00000016252.7	Atp5e	0.0326814	6.22804	0.0341997	0.854861	1	1974	1449	1422	1596	1412	1676	1786	1869
ENSMUSG00000016253.12	Nelfcd	0.0424115	5.07277	0.433469	0.514822	1	639	665	783	819	673	798	754	831
ENSMUSG00000016255.5	Tubb1	-0.0713747	2.96191	0.0324451	0.858666	1	110	229	144	167	174	106	209	280
ENSMUSG00000016256.10	Ctsz	-0.152984	7.4831	1.08205	0.307973	1	3863	3451	3590	3507	3056	3920	5294	4188
ENSMUSG00000016257.15	Prelid3b	-0.0607255	4.85025	0.307213	0.583103	1	636	548	592	600	540	689	683	728
ENSMUSG00000016262.14	Sertad4	0.497129	2.28656	12.0901	0.00143285	0.195592	91	140	141.25	165	100	96	113	98
ENSMUSG00000016283.13	H2-M2	-1.27768	3.31089	13.4499	0.00129215	0.18461	66	85	82	50	39	105	248	184
ENSMUSG00000016308.12	Ube2a	0.181578	4.93652	4.36827	0.0443345	0.844642	667	673	704	736	617	667	698	695
ENSMUSG00000016319.3	Slc25a5	0.0429926	7.87607	0.127917	0.723132	1	5857.57	4723.24	5310.85	5133.43	4565.21	5231.43	5943.43	6006.93
ENSMUSG00000016327.9	Atp1b4	1.43705	-3.45384	1.03103	0.323177	1	0	0	0	1	0	0	0	0
ENSMUSG00000016344.14	Ppdpf	-0.545977	5.28149	15.1017	0.000606441	0.125749	584.07	487.13	577.69	522.16	505.21	948.56	854.9	894.63
ENSMUSG00000016346.17	Kcnq2	-0.953887	-2.84028	0.815604	0.372961	1	0	0	2	1	2	1	2	4
ENSMUSG00000016349.10	Eef1a2	-0.0712041	2.61443	0.0440417	0.835589	1	125	117	180	208	151	213	81	268
ENSMUSG00000016356.18	Col20a1	-0.133291	2.31525	0.370062	0.547212	1	60	113	102	129	90	101	160	107
ENSMUSG00000016382.15	Pls3	0.176635	8.01093	5.50434	0.0250748	0.695544	5472	5383	5850	6368	5740	5340	5810	6392
ENSMUSG00000016386.15	Mpped2	0.222586	1.8025	1.61459	0.212662	1	72	70	80	103	72	81	70	82
ENSMUSG00000016409.4	Nkap	-0.0365002	4.45571	0.183698	0.670976	1	320	489	442	522	444	532	516	506
ENSMUSG00000016427.7	Ndufa1	0.0230366	4.62919	0.0148777	0.903926	1	652	440	496	503	496	573	625	568
ENSMUSG00000016458.14	Wt1	0.157201	0.803267	0.135872	0.715392	1	9	42	53	48	30	25	44	41
ENSMUSG00000016477.18	E2f3	-0.102316	3.80334	0.922045	0.343866	1	227	308	317	322	271	330	346	386
ENSMUSG00000016481.15	Cr1l	0.0510703	6.47732	0.693235	0.411004	1	1796.36	1932.27	2072.01	1994.95	1768.76	2119.59	2084.35	2142.54
ENSMUSG00000016487.15	Ppfibp1	0.0579162	6.94315	0.629146	0.43329	1	2057	2525.99	2955.99	3007.99	2654	2997	2720	2954.99
ENSMUSG00000016493.13	Cd46	-0.0774699	2.95566	0.195305	0.661397	1	85.88	150.24	140.39	184.89	142.46	162.03	142.99	201.5
ENSMUSG00000016494.9	Cd34	0.0755811	7.93304	0.503925	0.482733	1	5282.93	5140.89	5585.86	5785.87	4579.91	5465.89	6022.87	5719.91
ENSMUSG00000016495.12	Plgrkt	-0.129298	5.36362	1.54003	0.223293	1	580	914	957	876	811	1092	955	1046
ENSMUSG00000016496.7	Cd274	-0.592282	5.32921	3.29098	0.0831907	1	453.48	731.77	831.61	871.98	669.07	986.27	1327.77	1334.14
ENSMUSG00000016498.10	Pdcd1lg2	-1.77575	1.50436	9.89741	0.00458439	0.329963	33	29	40	18	17	35	202	86
ENSMUSG00000016503.17	Gtf3a	0.0761736	4.51101	0.574679	0.453742	1	537.97	465.64	481.96	471.48	466.52	592.67	484.59	512.53
ENSMUSG00000016510.11	Mtif3	0.0972558	4.10329	1.39426	0.24606	1	286.03	353.36	370.04	372.52	346.48	381.33	348.41	378.47
ENSMUSG00000016520.7	Lnx2	-0.147896	5.70368	2.24179	0.143754	1	891	1084	1137	1120	1050	1357	1372	1284
ENSMUSG00000016524.12	Il19	2.14535	-3.26949	1.75234	0.196988	1	0	1	0	1	0	0	0	0
ENSMUSG00000016526.8	Dyrk3	-0.108922	2.43819	0.617988	0.43736	1	96	90	103	124	92	118	110	146
ENSMUSG00000016528.10	Mapkapk2	0.209252	7.31607	5.85772	0.0211284	0.650169	3577	3390	3751	3954	3687	3601	3442	3897
ENSMUSG00000016529.5	Il10	-0.917241	-0.996808	4.11611	0.0505417	0.881672	11	7	6	6	11	6	27	21
ENSMUSG00000016534.15	Lamp2	0.0306275	8.29352	0.208037	0.651274	1	6044	6637	7235	7597	6281	7111	7991	7579
ENSMUSG00000016541.10	Atxn10	0.193112	6.96777	5.96309	0.0200866	0.640744	2761	2777	2946	3127	2690	2937	2696	2974
ENSMUSG00000016552.13	Foxred2	-0.189961	2.47977	1.62364	0.211414	1	102	112	100	86	91	130	123	134
ENSMUSG00000016554.9	Eif3d	-0.0793887	6.23004	1.02259	0.319203	1	1515.3	1488.47	1677.96	1575.11	1412.21	1836.08	1789.48	1953.83
ENSMUSG00000016559.14	H3f3b	0.134999	8.98586	1.62835	0.210768	1	11250.5	9389.1	10742	12050.9	10875.4	10712	11159.3	12242.1
ENSMUSG00000016619.10	Nup50	-0.127096	5.74049	3.28288	0.0790411	1	944	1044	1089	1176	1014	1265	1401	1280
ENSMUSG00000016624.15	Phf21b	-0.0927035	1.4328	0.155789	0.695583	1	26	58	50	61	51	69	43	67
ENSMUSG00000016626.10	Nlrp14	0	-3.49827	0	1	1	0	0	0	0	0	0	0	0
ENSMUSG00000016637.7	Ift27	0.0648128	3.78579	0.33125	0.568797	1	270	260	274	331	258	296	297	322
ENSMUSG00000016664.16	Pacsin2	0.116293	7.19128	2.88224	0.098898	1	2762	3406	3654	3870	3362	3442	3473	3860
ENSMUSG00000016756.17	Cmah	0.0316993	4.88453	0.0209462	0.886184	1	287	492	582	570	609	572	571	550
ENSMUSG00000016757.11	Ttll12	-0.0371307	4.59153	0.194689	0.661897	1	443	516	551	501	435	573	575	575
ENSMUSG00000016758.4	Bik	0.0849366	3.11326	0.356815	0.554325	1	171	158	192	195	179	223	173	184
ENSMUSG00000016763.15	Scube1	-0.143639	4.63242	1.3906	0.246958	1	391	474	490	518	430	652	547	544
ENSMUSG00000016831.12	Tox4	-0.0428657	6.41943	0.61401	0.438825	1	1501.91	1810.41	1951.29	1956.72	1613.6	2056.84	2077.13	2099.07
ENSMUSG00000016833.14	Mrps18c	0.0770403	3.83448	0.176726	0.677557	1	355.99	284.98	283.98	314.95	254	307.87	315.94	355.95
ENSMUSG00000016918.15	Sulf1	-0.28041	5.59215	3.96955	0.0568461	0.918396	768	1077	1092	928	946	1398	1391	1216
ENSMUSG00000016921.14	Srsf6	0.0103063	7.83896	0.00702455	0.933779	1	3160	5001	5082	5644	4975	5387	5202	5566
ENSMUSG00000016933.17	Plcg1	0.0120893	7.4668	0.0130396	0.909782	1	2663.98	3737.93	4192.98	4007.98	3826.99	4675.98	3775.95	4037.99
ENSMUSG00000016940.18	Kctd2	0.0320882	5.68421	0.138682	0.711957	1	966	976	1127	1195	1074	1333	1036	1217
ENSMUSG00000016942.6	Tmprss6	-0.33557	-1.37357	0.617988	0.43736	1	7	5	4	5	3	6	7	8
ENSMUSG00000016946.6	Kctd5	-0.0910816	4.99549	1.73275	0.197058	1	582	641	718	758	610	799	806	810
ENSMUSG00000016982.6	Pom121l2	1.4371	-3.34875	1.06614	0.312433	1	0	0	0	1	0	0	0	0
ENSMUSG00000016984.7	Etaa1	0.0946787	3.81596	1.19003	0.283162	1	261	320	299	327	297	327	322	318
ENSMUSG00000016995.17	Matn4	0.172994	6.18836	3.92859	0.0557821	0.912662	1269.56	1756.19	1704.41	1845.38	1648.52	1548.44	1793.24	1648.75
ENSMUSG00000016998.2	Svs4	0	-3.49827	0	1	1	0	0	0	0	0	0	0	0
ENSMUSG00000017000.2	Svs6	0	-3.49827	0	1	1	0	0	0	0	0	0	0	0
ENSMUSG00000017002.14	Slpi	-0.2119	6.2186	2.49827	0.12542	1	434	525	456	500	569	614	713	654
ENSMUSG00000017003.7	Svs3a	0	-3.49827	0	1	1	0	0	0	0	0	0	0	0
ENSMUSG00000017004.7	Svs5	0	-3.49827	0	1	1	0	0	0	0	0	0	0	0
ENSMUSG00000017007.9	Rbpjl	0.249432	6.15895	4.31888	0.046614	0.858715	1108.44	1648.81	1794.59	1928.62	1462.48	1545.56	1565.76	1436.25
ENSMUSG00000017009.3	Sdc4	0.00705978	7.50109	0.0103421	0.919608	1	3568	3959	4216	4707	3811	4079	5018	4717
ENSMUSG00000017049.4	Ccdc70	0	-3.49827	0	1	1	0	0	0	0	0	0	0	0
ENSMUSG00000017057.9	Il13ra1	-0.0854052	6.0994	0.870043	0.357664	1	1383	1342	1373	1486	1379	1645	1669	1778
ENSMUSG00000017064.4	Prl5a1	0	-3.49827	0	1	1	0	0	0	0	0	0	0	0
ENSMUSG00000017119.19	Nbr1	0.0163556	7.29074	0.0527927	0.81968	1	2603	3305	3541	3696	3266	3826	3522	3758
ENSMUSG00000017132.17	Cyth1	-0.106773	5.98503	3.84464	0.0583217	0.924769	1146	1268	1375	1355	1301	1550	1595	1623
ENSMUSG00000017144.8	Rnd3	-0.0438281	4.57992	0.228469	0.635787	1	370	582	550	633	475	670	613	551
ENSMUSG00000017146.12	Brca1	-0.235542	2.35623	0.820106	0.372878	1	84	98	90	109	65	86	134	140
ENSMUSG00000017165.1	Gast	-1.80834	-3.45393	1.6062	0.224016	1	0	0	0	0	0	0	0	1
ENSMUSG00000017167.6	Cntnap1	-0.189557	2.45338	0.919115	0.344623	1	66.38	122.07	121.28	120.18	94.11	139.19	117.12	151.46
ENSMUSG00000017176.17	Nt5c3b	0.051295	4.4526	0.368893	0.547732	1	411.61	422.71	456.54	507.73	455.7	571.42	472.62	449.59
ENSMUSG00000017188.3	Coa3	0.182783	5.32808	2.08288	0.159788	1	1029	845	864	903	815	951	851	915
ENSMUSG00000017195.15	Zpbp2	-0.243578	-1.30962	0.25291	0.618347	1	8	2	5	6	1	3	8	7
ENSMUSG00000017204.4	Gsdma	-1.81072	-3.34877	1.73871	0.19913	1	0	0	0	0	0	1	0	0
ENSMUSG00000017210.14	Med24	-0.0181452	5.44586	0.0760847	0.784381	1	759	877	960	988	886	1009	1019	1076
ENSMUSG00000017211.14	Gsdma2	0	-3.47593	0	1	1	0	0	0	0	0	0	0	0
ENSMUSG00000017221.14	Psmd3	0.047577	6.53001	0.667184	0.419846	1	1762	2004	2107	2192	1915	2289	2085	2254
ENSMUSG00000017264.16	Exosc10	-0.00793493	5.61493	0.0176876	0.894999	1	872	1009	1183	1039	942	1129	1147	1203
ENSMUSG00000017286.15	Glod4	0.0928631	5.31861	0.530041	0.472521	1	814.13	744.58	762.21	1100.51	810.07	889	813.26	1023.48
ENSMUSG00000017288.15	Vps53	0.0485215	5.06981	0.410464	0.526123	1	721	704	740	735	648	800	784	779
ENSMUSG00000017291.13	Taok1	0.0132344	6.73743	0.0357209	0.851241	1	1692	2263	2266	2605	2187	2416	2505	2539
ENSMUSG00000017299.13	Dnttip1	0.127884	4.0399	2.07402	0.159171	1	365	369	357	389.95	344	398	348	404.99
ENSMUSG00000017300.9	Tnnc2	-5.91056	-0.416187	16.7196	0.000477329	0.111638	0	0	3	0.86	4	0	1	352.19
ENSMUSG00000017307.16	Acot8	0.0529031	3.56294	0.341636	0.562829	1	218.38	247.13	268.35	252.28	229.63	241.15	284.21	279.34
ENSMUSG00000017309.11	Cd300lg	-0.0687797	4.22569	0.136701	0.714693	1	400	384	413	401	294	572	336	459
ENSMUSG00000017310.7	Spint4	1.45329	-3.45378	0.984689	0.335575	1	1	0	0	0	0	0	0	0
ENSMUSG00000017311.15	Pyy	0	-3.47589	0	1	1	0	0	0	0	0	0	0	0
ENSMUSG00000017314.12	Mpp2	0.0618964	4.33842	0.45031	0.50682	1	373	445	469	525	447	508	487	487
ENSMUSG00000017316.13	Ppy	0.844919	-1.71571	1.96351	0.170399	1	14	3	6	6	5	6	4	3
ENSMUSG00000017344.4	Vtn	0.0411207	4.4274	0.141427	0.709254	1	409	447	564	519	476	593	472	544
ENSMUSG00000017376.15	Nlk	0.0756764	5.34074	1.18007	0.285151	1	675	854	869	1004	894	926	909	956
ENSMUSG00000017386.10	Traf4	0.10502	4.3144	1.37808	0.248764	1	351	389	447	505	386	452	451	418
ENSMUSG00000017390.15	Aldoc	0.0455135	3.08021	0.117829	0.733561	1	195	182	167	165	177	209	192	193
ENSMUSG00000017400.10	Stac2	-0.748514	2.31017	13.5868	0.000805784	0.147673	39	56	75	65	58	87	169	79
ENSMUSG00000017404.12	Rpl19	0.0567874	8.7768	0.0968555	0.758328	1	10475.9	7528.25	8450.51	8766.7	7876.83	9647.39	9072.4	10022.2
ENSMUSG00000017405.14	Nek8	0.0384823	3.73222	0.134026	0.716612	1	221	303	321	340	251	302	316	337
ENSMUSG00000017412.15	Cacnb4	0.397727	0.727772	2.39924	0.130856	1	20.47	28.68	42.43	43.76	37.02	23.02	32.1	33.88
ENSMUSG00000017417.14	Plxdc1	-0.0897035	4.46053	0.986997	0.327649	1	403	455	503	491	399	628	482	533
ENSMUSG00000017418.14	Arl5b	-0.042922	5.35152	0.251654	0.619216	1	664	827	832	1081	714	980	985	929
ENSMUSG00000017421.18	Zfp207	-0.0284385	7.09663	0.149927	0.701071	1	2179	2727	2927	3311	2737	3018	3333	3325
ENSMUSG00000017428.16	Psmd11	0.000483594	5.99002	6.17181e-05	0.993779	1	1229.8	1470.53	1447.32	1390.98	1295.71	1552.71	1579.82	1563.13
ENSMUSG00000017446.14	C1qtnf1	-0.059914	5.20391	0.473658	0.49608	1	712.55	842.67	1002	848.31	697.2	943.69	1085.17	897.49
ENSMUSG00000017453.4	Pipox	0.101652	0.199282	0.167786	0.684713	1	21	28	20	24	21	32	22	19
ENSMUSG00000017466.9	Timp2	0.00495277	9.37967	0.00522929	0.942785	1	13284	15178	16318	16495	14096	17868	16888	16753
ENSMUSG00000017478.15	Zc3h18	-0.0472272	6.01419	0.419662	0.521552	1	968.92	1272.9	1528.96	1444.89	1285.98	1526.78	1564.03	1495.96
ENSMUSG00000017485.11	Top2b	-0.0373581	6.93972	0.350203	0.557999	1	1952.29	2491.36	2698.6	2652.57	2475.07	2864.22	2875.3	2882.94
ENSMUSG00000017491.9	Rarb	-0.317865	1.88382	3.23525	0.0811479	1	64.71	60.64	73.4	63.43	61.93	96.78	75.7	106.06
ENSMUSG00000017493.12	Igfbp4	0.0435976	8.06067	0.196152	0.660712	1	7167	6025	6980	6692	5762	7199	7422	7226
ENSMUSG00000017499.15	Cdc6	-0.296295	2.26296	1.3631	0.252548	1	85	85	103	104	70.94	83	149	144.99
ENSMUSG00000017548.15	Suz12	0.0361617	5.90352	0.35638	0.554565	1	1088	1243	1252	1322	1255	1316	1390	1422
ENSMUSG00000017550.14	Atad5	-0.141688	2.64375	0.557946	0.460336	1	89	99	122	139	103	102	160	154
ENSMUSG00000017561.16	Crlf3	-0.0881875	5.88648	2.22346	0.14535	1	960	1212	1239	1274	1152	1406	1377	1471
ENSMUSG00000017588.2	Krt27	0	-3.45381	0	1	1	0	0	0	0	0	0	0	0
ENSMUSG00000017607.9	Tns4	-0.163821	1.53147	0.879657	0.355055	1	57	48	74	64	55	71	81	77
ENSMUSG00000017615.12	Tnfaip1	0.0634411	7.53815	0.75675	0.390581	1	3709	3879	4310	4407	3727	4654	4287	4218
ENSMUSG00000017631.19	Abr	-0.0170848	6.77251	0.0621699	0.804632	1	1916	2242	2361	2422	2329	2579	2555	2695
ENSMUSG00000017639.13	Rab11fip4	-0.531368	4.53004	28.0775	7.4675e-06	0.00636702	256	330	377	395	391	524	559	648
ENSMUSG00000017652.16	Cd40	-0.0922816	4.25238	0.707665	0.406226	1	368	396	464	421	322	385	566	489
ENSMUSG00000017664.16	Slc35c2	0.0873155	5.23657	0.989659	0.327007	1	804	783	838	844	791	868	853	912
ENSMUSG00000017667.9	Zfp334	-0.00241362	4.0707	0.000891251	0.976362	1	287	358	362	398	329	424	364	402
ENSMUSG00000017670.16	Elmo2	0.0174859	6.54532	0.0666232	0.797909	1	1625	2160	2253	2339	1800	2462	2180	2229
ENSMUSG00000017677.11	Wsb1	-0.16127	6.70849	1.60525	0.215751	1	1294	2213	2332	2411	2034	2679	2543	2605
ENSMUSG00000017679.16	Ttpal	-0.210597	5.68904	7.56436	0.00955506	0.463705	920	898	1060	943	961	1222	1326	1261
ENSMUSG00000017686.17	Rhot1	0.034797	5.75023	0.309893	0.581472	1	1071	1153	1153	1259	1140	1295	1276	1306
ENSMUSG00000017688.14	Hnf4g	0.811942	-2.89791	0.355148	0.555246	1	1	0	2	0	0	0	1	0
ENSMUSG00000017692.8	Rhbdl3	-0.175037	2.60086	1.42955	0.240291	1	86	121	117	135	112	150	142	149
ENSMUSG00000017697.3	Ada	-0.147535	1.98149	0.6256	0.434577	1	78	76	70	62	98	117	79	99
ENSMUSG00000017707.9	Serinc3	0.13608	10.004	1.80782	0.187866	1	24318	21690	21987	22357	23281	24626	22559	24390
ENSMUSG00000017713.9	Tha1	-0.0695742	3.18549	0.267205	0.608632	1	135	168	194.82	199	205	195	229.99	223
ENSMUSG00000017715.11	Pgs1	0.0495149	6.49524	0.532834	0.470527	1	1785	1873	2017.99	2159	2041	2167	2207	2183
ENSMUSG00000017716.15	Birc5	0.0709717	3.52984	0.0599297	0.808773	1	298	270	243	297	160	203	307	322
ENSMUSG00000017718.15	Afmid	-0.0666748	2.63967	0.170002	0.682755	1	101.02	93.15	140.5	108.13	102.13	126.05	124.63	141.15
ENSMUSG00000017720.2	Trp53tg5	-1.81072	-3.30879	1.57789	0.221024	1	0	0	0	0	0	1	0	0
ENSMUSG00000017721.15	Pigt	0.10081	6.18279	2.17456	0.149711	1	1614.78	1683.81	1779.8	1767.6	1490.66	1829.28	1815.81	1698.44
ENSMUSG00000017723.11	Wfdc2	0.0948848	9.06943	0.648297	0.426731	1	13090	10544	11747	12612	10495	13887	10804	13165
ENSMUSG00000017724.14	Etv4	-0.0643881	-0.498258	0.0352908	0.852129	1	12	8	19	15	9	13	19	13
ENSMUSG00000017733.4	Eppin	0.717117	-1.77658	1.40559	0.24419	1	4	6	6	9	9	3	5	6
ENSMUSG00000017734.15	Dbndd2	0.102233	5.28396	1.42127	0.24163	1	871	852	878	978	850	947	891	1003
ENSMUSG00000017737.2	Mmp9	-0.267335	4.28393	0.616856	0.4405	1	187	547	389	216	880	477	563	812
ENSMUSG00000017740.17	Slc12a5	-0.889809	2.55333	25.9467	1.37084e-05	0.0101297	58	68	106	89	75	212	139	150
ENSMUSG00000017747.13	Ghdc	-0.00858908	4.19758	0.0105433	0.918833	1	359	427	393	457	392	457	460	484
ENSMUSG00000017754.13	Pltp	0.154673	8.80313	2.85512	0.100435	1	9586.29	10273.8	12442.4	10970.9	10024.7	11086.5	9724.63	12085.2
ENSMUSG00000017756.9	Slc12a7	-0.239461	6.59871	5.60937	0.023828	0.684106	1460	1994	2212	2247	1824	2944	2371	2532
ENSMUSG00000017760.16	Ctsa	0.0261956	7.51326	0.186047	0.66901	1	3701.59	4022.95	4161.15	4159.95	3569.22	4350.65	4496.92	4390.99
ENSMUSG00000017764.2	Zswim1	-0.0234675	3.62693	0.0481187	0.82771	1	263	224.51	296	241	274.63	300	308	302.55
ENSMUSG00000017765.17	Slc12a4	-0.034247	6.39178	0.211072	0.648916	1	1383.27	1827.91	2211.28	2026.84	1701.59	2174.24	2137.22	2083.47
ENSMUSG00000017767.3	Spata25	-0.081698	-1.62021	0.0246351	0.876228	1	4	4.49	8	7	3.37	3	6	10.45
ENSMUSG00000017774.19	Myo1c	0.128298	8.716	4.54801	0.040425	0.814953	7756	9127	10375	10665	9315	9620	9703	10267
ENSMUSG00000017776.15	Crk	0.0325288	7.51034	0.302139	0.586216	1	3684	4002	4101	4386	3775	4486	4405	4509
ENSMUSG00000017778.14	Cox7c	0.101036	5.71649	0.488148	0.490979	1	1285.09	1011.22	1014.43	1172.03	962.64	1150.96	1123.06	1240.1
ENSMUSG00000017781.17	Pitpna	0.138515	7.37145	3.33404	0.076847	1	3702	3593	3849	3872	3765	3918	3937	3903
ENSMUSG00000017801.15	Mlx	0.0305147	5.08558	0.126289	0.724554	1	779.67	667.2	746.04	690.74	707.14	819.6	805.46	804.53
ENSMUSG00000017802.14	Retreg3	0.0541687	6.67254	0.742152	0.395139	1	1961	2278	2282	2376	2126	2600	2318	2373
ENSMUSG00000017817.11	Jph2	-0.0212266	4.90706	0.0444737	0.834261	1	505	669	749	720	589	732	741	769
ENSMUSG00000017830.15	Dhx58	-0.709187	3.82386	8.66046	0.00722071	0.414264	265	356.98	326.97	378.94	251.97	383.97	861.91	516
ENSMUSG00000017831.8	Rab5a	0.127097	6.25821	3.97322	0.0544824	0.906053	1552	1562.96	1690.88	1976.9	1615.91	1708.98	1710	1860.98
ENSMUSG00000017832.2	Hspb9	-0.601235	-1.6784	1.42203	0.241506	1	3	4	6	3	4	12	5	4
ENSMUSG00000017837.12	Nkiras2	0.152505	5.24235	2.74474	0.106978	1	896.4	828.25	938.23	937.2	724.08	956.15	848.28	872.13
ENSMUSG00000017843.14	Ppp2r5c	0.0436909	7.02295	0.626881	0.434111	1	2530	2795	3003	3009	2595	3117	3098	3063
ENSMUSG00000017858.12	Ift52	-0.0976185	5.09497	1.8947	0.177867	1	700	623	753	737	640	820	841	882
ENSMUSG00000017861.11	Mybl2	-0.286791	2.56712	2.1288	0.153932	1	101.34	112.98	99.93	109.02	74.73	132.71	144.06	140.98
ENSMUSG00000017868.16	Sgk2	-0.504452	-2.31817	0.557623	0.460465	1	2	2	1	1	2	2	3	3
ENSMUSG00000017897.18	Eya2	0.0222592	5.41363	0.0542079	0.817323	1	984	827	936	987	840	927	1075	1104
ENSMUSG00000017922.14	Prl3c1	0	-3.49827	0	1	1	0	0	0	0	0	0	0	0
ENSMUSG00000017929.13	B4galt5	-0.2131	5.67722	4.34428	0.0448872	0.849913	800	1225	1226	1298	1039	1377	1542	1500
ENSMUSG00000017943.15	Gdap1l1	0.291631	-2.42178	0.108106	0.744372	1	1	3	0	2	3	0	1	4
ENSMUSG00000017950.16	Hnf4a	0.586778	-2.65221	0.337712	0.565069	1	6	0	3	0	2	3	0	2
ENSMUSG00000017969.13	Ptgis	0.372586	6.19954	10.2312	0.0032631	0.287151	1918	1747.27	1843.57	1943	1818	1794	1491.47	1656
ENSMUSG00000017978.18	Cadps2	0.0176941	5.07876	0.0477514	0.828358	1	623	700	769	898	722	824	823	863
ENSMUSG00000017999.16	Ddx27	-0.069375	4.91643	0.851068	0.362893	1	495	616	704	690	614	711	776	752
ENSMUSG00000018001.18	Cyth3	0.314139	8.12024	13.3294	0.000888235	0.15529	6672	6510	7513	7491	6814	7080	5879	6405
ENSMUSG00000018008.8	Cyth4	-0.268531	6.34997	3.59303	0.0693089	0.975163	1195	1755	1854	1547	1425	1947	2320	2140
ENSMUSG00000018012.11	Rac3	0.23254	3.71309	2.49052	0.124114	1	278	238	313	343	277	292	244	311
ENSMUSG00000018040.9	Rrp7a	0.0295445	5.74686	0.173692	0.679528	1	1074.8	1069.93	1232.72	1233.99	1086.5	1315.54	1224.83	1296.01
ENSMUSG00000018042.18	Cyb5r3	0.135427	8.17554	4.42194	0.0431252	0.833349	6127.92	6694.97	7127.92	7725	6390	7018.9	6640	7630.97
ENSMUSG00000018068.13	Ints2	-0.191882	3.88405	2.98261	0.0934388	1	227.35	304.53	310.08	305.98	283.02	333.71	416.14	369.49
ENSMUSG00000018076.12	Med13l	0.136099	6.06276	2.39746	0.130994	1	1174	1342	1442	1513	1454	1416	1482	1425
ENSMUSG00000018102.5	Hist1h2bc	-0.300565	5.79392	6.33127	0.0175902	0.603632	985.32	861.8	784.9	959.9	878.95	1228.05	1188.29	1394
ENSMUSG00000018126.15	Baiap2l2	0.519328	-0.901887	2.53597	0.120737	1	7	8	14	15	15	10	8	10
ENSMUSG00000018143.10	Mafk	0.0313909	6.44127	0.200291	0.657387	1	1599.45	1850.03	2050.74	2244.6	1849.07	2099.56	2057.65	2270.47
ENSMUSG00000018160.15	Med1	-0.135076	5.76852	3.19936	0.082777	1	795	1059	1088	1129	983	1210	1358	1228
ENSMUSG00000018166.8	Erbb3	0.0987766	6.08324	1.68509	0.203177	1	1246	1408	1489	1642	1453	1604	1572	1457
ENSMUSG00000018167.10	Stard3	0.0234073	5.8294	0.0991914	0.754769	1	1214	1270	1290	1368	1130	1420	1410	1413
ENSMUSG00000018168.8	Ikzf3	-0.78149	4.76377	18.5862	0.000230058	0.0724434	240	281	351	292	269	471	678	537
ENSMUSG00000018169.12	Mfng	0.179438	5.56186	4.39536	0.0437196	0.838984	1001	1045	1186	1187	976	1064	1016	1192
ENSMUSG00000018171.9	Vmp1	-0.142842	6.7645	2.04177	0.162354	1	2206	2210	2294	2357	1930	2212	3111	3033
ENSMUSG00000018189.12	Uchl5	0.057789	3.90184	0.212919	0.647492	1	338	240	275	338	276	293	331	349
ENSMUSG00000018196.18	Glrx2	-0.0149697	4.76661	0.058294	0.810695	1	512	602	564	601	569	655	649	675
ENSMUSG00000018199.9	Ro60	0.259949	5.73151	10.0497	0.0032642	0.287151	917	1021	1060	1337	1098	971	975	1164
ENSMUSG00000018209.15	Stk4	-0.00176365	7.25887	0.000615692	0.980352	1	2295	3230	3207	3559	2948	3371	3511	3542
ENSMUSG00000018211.13	Wfdc15b	0	-3.49827	0	1	1	0	0	0	0	0	0	0	0
ENSMUSG00000018217.12	Pmp22	0.163433	8.86628	3.46808	0.0714156	0.981627	10219	10572	10878	11068	10503	10764	9905	12104
ENSMUSG00000018238.6	Gdf9	0.230442	-0.0641351	0.521051	0.475437	1	16	19	28	16	22	20	21	18
ENSMUSG00000018239.9	Zcchc10	0.0981345	2.86798	0.664273	0.420852	1	123	146	148	152	152	161	135	167
ENSMUSG00000018259.13	Prl8a2	0	-3.49827	0	1	1	0	0	0	0	0	0	0	0
ENSMUSG00000018263.11	Tbx5	0.208804	5.594	4.56917	0.0399903	0.811832	913	1222	1385	1281	1146	1142	1128	1250
ENSMUSG00000018286.6	Psmb6	0.0455799	6.28867	0.151652	0.699764	1	1838	1464	1745	1719	1457	1836	1840	1823
ENSMUSG00000018287.12	Spag7	-0.00357851	5.13212	0.00221817	0.962717	1	644	780	819	837	742	827	853	948
ENSMUSG00000018293.4	Pfn1	-0.0180985	8.17424	0.0329942	0.856965	1	6311	5907	6211	6128	5714	6376	7234	7552
ENSMUSG00000018322.10	Tomm34	-0.182222	5.37636	8.19475	0.00721611	0.414264	606	778	827	889	729	998	977	996
ENSMUSG00000018326.9	Ywhab	0.000271181	8.32541	2.13153e-05	0.996344	1	6237	6587	7255	7295	6446	7433	7739	8060
ENSMUSG00000018334.18	Ksr1	-0.145046	5.13745	1.99757	0.16684	1	491	755	880.92	802	699	986.98	827	921.98
ENSMUSG00000018339.11	Gpx3	0.0413535	9.74409	0.10768	0.745036	1	21619	17024	18510	17433	18407	21215	20483	20995
ENSMUSG00000018340.13	Anxa6	0.0459498	8.02309	0.509533	0.480319	1	5167	5525	6106	6211	5100	5948	6498	6233
ENSMUSG00000018341.12	Il12rb2	-0.269816	1.01032	1.2129	0.278664	1	29.9	54.77	45.5	26.41	32.41	48.07	65.1	43.32
ENSMUSG00000018347.16	Zkscan6	-0.0120642	3.84069	0.022202	0.882451	1	275	275	327	352	273	353	343	342
ENSMUSG00000018362.14	Kpna2	-0.113271	5.58473	0.690335	0.413393	1	1028.61	962.56	1046.23	1097.38	790.17	1060.31	1365.06	1236.87
ENSMUSG00000018363.16	Smurf2	0.149249	7.1874	4.53609	0.0406721	0.816402	2928	3394	3392	3475	2904	3348	3131	3490
ENSMUSG00000018372.13	Cep95	-0.134798	3.78212	0.979749	0.329406	1	145	278	299	305	260	317	294	351
ENSMUSG00000018377.10	Vezf1	0.0593444	6.78007	0.684074	0.414081	1	1869	2383	2516	2710	2311	2648	2559	2531
ENSMUSG00000018378.13	Cuedc1	-0.0197251	5.50663	0.0385607	0.845516	1	714	1016	1104	1128	948	1273	973	1154
ENSMUSG00000018379.17	Srsf1	0.022217	7.80813	0.0389051	0.844912	1	3163	4537	4911	5696	4723	4755	5271	5427
ENSMUSG00000018381.15	Abi3	0.350205	6.0233	18.0631	0.00016254	0.059264	1528.59	1538.31	1778.25	1614.75	1689.36	1394.53	1357.47	1653.72
ENSMUSG00000018387.12	Shroom1	-0.233389	2.13643	2.08902	0.157716	1	69	88	88	83	72	106	96	121
ENSMUSG00000018395.19	Kif3a	0.00554627	4.33066	0.00645249	0.936458	1	341	409	442	434	390	480	441	456
ENSMUSG00000018398.18	2008-09-01	0.0719914	6.8719	0.667275	0.419815	1	2068	2804	3088	2954	2518	3011	2910	2809
ENSMUSG00000018401.17	Mtmr4	-0.0756153	6.12666	0.882533	0.35428	1	1213	1465	1518	1433	1519	1600	1898	1675
ENSMUSG00000018405.7	Mrm1	-0.0743626	3.33398	0.405435	0.528653	1	190	184	213	243	214	244	236	275
ENSMUSG00000018411.17	Mapt	0.211257	7.42621	2.51389	0.124374	1	2805	4011	4490	4401	4142	4125	3390	4204
ENSMUSG00000018412.16	Kansl1	-0.0836131	6.37714	1.15712	0.289803	1	1385	1715.47	1940	1764.64	1507	2121.79	1961	1947
ENSMUSG00000018415.14	Gid4	0.0951967	6.10156	1.19095	0.282979	1	1296	1479	1587	1612	1481	1821	1403	1567
ENSMUSG00000018417.14	Myo1b	0.0929028	8.03241	1.1466	0.291969	1	4496	5494	6066	6734	5752	6224	5850	6227
ENSMUSG00000018425.18	Dhx40	0.0679556	5.65908	0.864118	0.359285	1	917	1124	1174	1296	1006	1260	1216	1123
ENSMUSG00000018427.8	Ypel2	0.183369	4.80291	2.27545	0.141361	1	473	691	547	683	630	695	567	564
ENSMUSG00000018428.15	Akap1	0.0827723	5.08295	0.918145	0.344875	1	602	756	887	811	712	848	787	799
ENSMUSG00000018433.14	Nol11	-0.0228287	4.62697	0.124694	0.726226	1	473	514	558	565	472	594	614	592
ENSMUSG00000018442.13	Derl2	0.0495715	5.87933	0.673385	0.417715	1	1124.58	1285.62	1221.78	1350.83	1215.8	1348.33	1356.14	1412.88
ENSMUSG00000018446.8	C1qbp	0.0412534	4.73033	0.15198	0.699135	1	635	525	579	584	551	649	620	661
ENSMUSG00000018449.12	Rpain	0.036028	3.73557	0.138951	0.71169	1	290	283	278	298	254	298	350	294
ENSMUSG00000018451.7	6330403K07Rik	0.0889911	1.74616	0.238212	0.628702	1	59	59	71	84	76	87	62	76
ENSMUSG00000018459.15	Slc13a3	-0.39942	1.85895	4.64364	0.0385009	0.804047	76	83	88	64	58	82	143	110
ENSMUSG00000018470.8	Kcnab3	-0.0561399	0.00344899	0.041173	0.84044	1	15	18	20	21	16	23	25	16
ENSMUSG00000018474.18	Chd3	-0.0234395	7.63833	0.0618154	0.805178	1	3015	3960	4578	4319	3929	4975	4543	4231
ENSMUSG00000018476.7	Kdm6b	-0.10839	6.27294	0.333116	0.569388	1	937.93	1827.83	1894.85	1997.38	1642.78	2082.42	1930.78	2065.67
ENSMUSG00000018479.12	1700125H20Rik	-2.59055	-3.12331	3.347	0.0791521	1	0	0	0	0	0	1	1	0
ENSMUSG00000018481.9	Appbp2	-0.104935	5.91584	2.69023	0.110388	1	961	1092	1277	1354	1195	1431	1462	1434
ENSMUSG00000018486.2	Wnt9b	0.028096	-1.38465	0.00532486	0.95764	1	7	5	7	5	10	10	7	6
ENSMUSG00000018500.2	Adora2b	-0.190919	3.96757	1.73669	0.197239	1	277	298	325	366	247	323	488	370
ENSMUSG00000018501.17	Ncor1	-0.0268104	7.2311	0.16671	0.685669	1	2469	2939	3050	3098	2683	3328	3346	3273
ENSMUSG00000018507.16	Trpv2	0.0238877	4.89812	0.0813941	0.777186	1	613	576	679	675	569	700	669	736
ENSMUSG00000018509.8	Cenpv	0.0163578	2.72616	0.0134153	0.908488	1	152	148	127	153	109	153	144	173
ENSMUSG00000018537.16	Pcgf2	0.257292	4.611	4.77875	0.0359521	0.788215	374	597	623	640	525	600	436	539
ENSMUSG00000018541.10	Cwc25	-0.0767649	4.65279	1.14456	0.292391	1	457	537	524	587	437	588	655	594
ENSMUSG00000018543.8	1700001P01Rik	1.46127	-2.86885	1.53878	0.223476	1	2	2	0	1	0	0	1	0
ENSMUSG00000018547.8	Pip4k2b	-0.0541516	5.89281	0.701814	0.408153	1	1039	1291	1403	1344	1150	1555	1454	1418
ENSMUSG00000018548.15	Trim37	-0.0651003	4.809	0.667529	0.419727	1	562	525	547	651	513	686	623	705
ENSMUSG00000018554.13	Ybx2	-0.399476	1.08986	3.35456	0.0759862	1	52	47	50	62	40	62	99	66
ENSMUSG00000018559.16	Ctdnep1	0.00465369	6.16391	0.00449114	0.94697	1	1542	1530	1666	1720	1551	1884	1789	1819
ENSMUSG00000018565.17	Elp5	0.101946	4.72048	0.867288	0.358416	1	639	525	586	630	502	619	637	595
ENSMUSG00000018566.14	Slc2a4	0.0221258	2.96681	0.0121142	0.913109	1	167	151	215	263	191	188	194	283
ENSMUSG00000018567.14	Gabarap	0.12818	7.7525	0.71277	0.406411	1	5440	4403	4548	4577	4179	4906	4792	4979
ENSMUSG00000018569.12	Cldn7	0.0807776	5.21406	0.520881	0.475686	1	788	789	853	894	813	882	814	997
ENSMUSG00000018570.17	2810408A11Rik	-0.0330981	0.737452	0.0196583	0.889341	1	38	26	41	29	26	34	34	45
ENSMUSG00000018572.10	Phf23	0.0211045	5.70524	0.0980127	0.756182	1	1056	1066	1157	1218	1109	1318	1247	1233
ENSMUSG00000018574.14	Acadvl	0.0674435	6.06352	0.87135	0.357308	1	1271.25	1443.44	1537.19	1775.46	1384.19	1774.6	1494.44	1573.53
ENSMUSG00000018581.15	Dnah11	-0.131813	3.85671	0.723125	0.401797	1	165.91	234.33	284.97	285.64	274.64	345.72	248.88	338.06
ENSMUSG00000018583.5	G3bp1	-0.0517905	6.92944	0.737605	0.396575	1	2197.65	2458.91	2696.93	2605.7	2323.45	2885.3	2877.9	2977.3
ENSMUSG00000018585.9	Atox1	0.0637222	5.53459	0.170174	0.683461	1	1183	930	1017	1008	810	1110	1122	1041
ENSMUSG00000018589.8	Glra2	0	-3.47598	0	1	1	0	0	0	0	0	0	0	0
ENSMUSG00000018593.13	Sparc	0.21991	10.6117	6.61904	0.0147339	0.561895	33788	39198	36355	41602	33891	39280	38013	31580
ENSMUSG00000018595.6	Glra4	0	-3.34847	0	1	1	0	0	0	0	0	0	0	0
ENSMUSG00000018599.5	Mief2	0.0835012	4.15576	1.16571	0.288049	1	342	371	415	407	392	415	415	419
ENSMUSG00000018604.18	Tbx3	0.277879	7.07459	9.32624	0.0044235	0.326873	2609.8	3490.85	3661.9	3440.83	3265	3334.87	2796.86	3177.92
ENSMUSG00000018620.3	Mmp20	-0.365112	-3.36879	0.0638911	0.802668	1	0	0	0	0	1	0	1	0
ENSMUSG00000018623.9	Mmp7	-0.467602	-2.92866	0.166739	0.685723	1	1	0	1	1	0	0	1	2
ENSMUSG00000018634.10	Crhr1	-1.80838	-3.28877	1.32889	0.261228	1	0	0	0	0	0	0	0	1
ENSMUSG00000018648.15	Dusp14	0.266266	5.10941	3.99905	0.0552101	0.910227	820	683	845	936	756	728	700	884
ENSMUSG00000018651.14	Tada2a	-0.00508166	3.67781	0.00226803	0.962301	1	224	264	311	304	258	312	303	320
ENSMUSG00000018654.17	Ikzf1	-0.12496	5.95792	1.57439	0.218314	1	929	1155	1234	1199	1221	1227	1547	1518
ENSMUSG00000018656.5	Tcaf3	0.41425	-3.02226	0.138108	0.712525	1	2	1	1	2	0	1	0	2
ENSMUSG00000018659.12	Pnpo	-0.0093149	4.68175	0.0110815	0.916795	1	517.35	516.21	583.3	574.3	531.92	659.47	611.17	613.85
ENSMUSG00000018661.17	Cog1	0.0195979	5.56997	0.0986273	0.755444	1	916.17	1009.04	1079.2	1029.59	997.86	1142.1	1113.7	1157.52
ENSMUSG00000018666.13	Cbx1	0.0762085	5.90247	1.54698	0.222275	1	1160	1332	1268	1395	1183	1380	1405	1344
ENSMUSG00000018669.14	Cdk5rap3	0.0263117	5.15311	0.145606	0.705196	1	687	734	810	829.99	710	780.96	866.99	893.96
ENSMUSG00000018672.15	Copz2	0.215176	4.15461	5.30088	0.0277067	0.723285	409	404	400	468	386	414	398	413
ENSMUSG00000018677.9	Slc25a39	0.190588	6.32027	3.12924	0.0865262	1	1896	1783	1759	1904	1867	1987	1788	1796
ENSMUSG00000018678.13	Sp2	0.0445418	5.03957	0.248657	0.621303	1	579	748	838	819	617	809	767	810
ENSMUSG00000018697.14	Aatf	0.0416662	3.63961	0.217313	0.644133	1	240	267	291	289	234	299	301	280
ENSMUSG00000018698.15	Lhx1	0.966895	-2.55522	0.850761	0.363183	1	1	2	1	0	5	1	0	2
ENSMUSG00000018707.13	Dync1h1	-0.112493	8.38145	2.46344	0.125987	1	5057.79	6405.75	7207.92	7378.82	6235.93	7925.72	8299.73	7615.93
ENSMUSG00000018727.19	Cpsf4l	-0.0250122	-1.01087	0.00401648	0.949847	1	2	12	9	12	14	14	10	10
ENSMUSG00000018733.10	Pex12	0.199954	3.51141	4.49023	0.0416388	0.823871	227	277	282	262	199	241	237	267
ENSMUSG00000018736.14	Ndel1	0.0652861	6.13401	0.786439	0.381545	1	1410	1602	1576	1684	1483	1681	1682	1730
ENSMUSG00000018740.14	Slc25a35	-0.215506	4.86781	5.11058	0.0304436	0.74331	607.49	592.16	669.62	591.56	515.54	729.49	839.59	810.11
ENSMUSG00000018750.14	Zbtb4	-0.0622103	8.01197	0.609034	0.440669	1	4214	5402	6176	5943	4913	6542	5736	6749
ENSMUSG00000018752.19	Tnfsfm13	0.0927884	4.51569	0.364883	0.550826	1	613.65	477.87	518.38	474.51	443.88	637.82	550.14	452.89
ENSMUSG00000018761.14	Mpdu1	0.0955704	5.09483	1.77186	0.192203	1	731	683	773	795	692	755	765	847
ENSMUSG00000018765.5	Fxr2	-0.00369152	6.28331	0.00307672	0.956097	1	1340	1793	1826	1859	1611	2005	1842	1938
ENSMUSG00000018770.9	Atp5g3	0.104186	6.74689	1.26903	0.268009	1	2589	2185	2375	2563	2242	2496	2559	2622
ENSMUSG00000018774.13	Cd68	-0.0988604	5.95286	0.390435	0.537823	1	1313	1332	1358	1208	988	1404	1691	1479
ENSMUSG00000018776.10	Slc35g3	-0.422555	0.387297	1.73565	0.196693	1	24	11	21	30	16	29	27	38
ENSMUSG00000018796.13	Acsl1	0.153859	6.11437	2.88038	0.0990028	1	1417	1489	1877	1846	1534	1526	1580	1923
ENSMUSG00000018800.14	Abca5	0.0932042	5.41692	1.16852	0.28748	1	786	785	908	1029	903	895	888	1056
ENSMUSG00000018809.2	Smyd4	-0.116614	3.11587	1.17957	0.28525	1	158	149	172	175	175	212	183	224
ENSMUSG00000018819.10	Lsp1	0.0245025	7.3441	0.06067	0.806954	1	3318	3431	3605	3480	3213	4094	3554	3897
[truncated: 53,422 more rows]

## Sheet: C) DEGs n=132
Ensembl	GeneID	logFC	logCPM	F	PValue	FDR	IL-28RA-/- mouse 1	IL-28RA-/- mouse 2	IL-28RA-/- mouse 3	IL-28RA-/- mouse 4	IL-28RA-/- mouse 5	WT mouse 1	WT mouse 2	WT mouse 3
ENSMUSG00000094991.2	Gm21718	8.05519	-1.72262	55.3588	3.57199e-06	0.00359933	38	23.98	57.92	23	11	0	0	0
ENSMUSG00000074625.10	Arhgap40	3.55798	0.77883	131.488	4.22573e-13	2.80013e-09	136	132	165	185	144	17	9	18
ENSMUSG00000045842.9	Tgif2-ps2	2.99583	-0.854396	30.462	4.7788e-06	0.00434173	23.45	45.5	52.84	48.4	33.67	3.45	11.56	1.95
ENSMUSG00000086638.7	4930405A21Rik	2.25075	-1.30728	20.7384	6.72048e-05	0.033255	16	9	16	25	6	3	3	4
ENSMUSG00000117465.1	Gm49980	1.86141	2.53707	25.4361	3.96398e-05	0.023125	300	342.84	348	388	325	57	73	193
ENSMUSG00000038572.7	Bpifb5	1.74627	2.78955	95.7581	2.54981e-11	1.00938e-07	448	380	361	381	350	111	148	137
ENSMUSG00000069307.6	Hist1h2bq	1.71376	0.458737	31.9026	2.64938e-06	0.00301929	90.17	86.29	57.15	63.38	83.13	18.02	26.61	35.86
ENSMUSG00000024907.7	Gal	1.71218	0.19431	19.5712	0.000100898	0.0443799	51	38	41	27	37	7	10	24
ENSMUSG00000057897.14	Camk2b	1.54381	3.53711	26.2006	3.45563e-05	0.0208941	434	468	612	555	566	229	163	228
ENSMUSG00000105263.1	Gm42427	1.39659	1.24853	43.316	1.69428e-07	0.000323789	88.05	122.51	117.43	78.18	79.6	38.63	40.55	47.62
ENSMUSG00000032679.12	Cd59a	1.36371	4.0579	103.014	1.01761e-11	5.127e-08	740	676	683	674	635	309	295	311
ENSMUSG00000044349.15	Snhg11	1.3515	6.25075	32.5945	8.80188e-06	0.0069687	1710	3537	3747	3807	3444	1499	1455	1366
ENSMUSG00000116207.1	Nnt	1.34237	4.40169	150.968	6.5049e-14	5.15011e-10	757.44	799.62	1005.38	1060.67	877.06	432.95	325.75	456.92
ENSMUSG00000037754.13	Ppp1r16b	1.21686	7.52207	180.546	5.3896e-15	7.46743e-11	6275	7251	7972	7649	6389	3810	3430	3237
ENSMUSG00000074607.11	Tox2	1.19082	4.51577	87.5067	1.05324e-10	3.89143e-07	826	833	976	990	1004	396	444	555
ENSMUSG00000044026.3	Slc35g1	1.00343	2.71813	37.8757	5.93224e-07	0.00080693	199	169	184	202	232	102	99	139
ENSMUSG00000021700.10	Rab3c	0.985942	1.62392	21.5211	5.23748e-05	0.0280147	81	90	61	96	84	36	62	45
ENSMUSG00000061577.12	Adgrg5	0.961663	3.1036	27.1348	1.14403e-05	0.00868001	234	375	308	298	297	174	164	195
ENSMUSG00000042804.13	Gpr153	0.914214	5.24768	115.77	2.26822e-12	1.25707e-08	1152	1344	1361	1484	1182	788	749	837
ENSMUSG00000020889.11	Nr1d1	0.91333	7.2519	30.1415	1.12912e-05	0.00868001	4128.95	4464.34	5788.08	6294.45	5715.06	3113.84	2531.45	3954.31
ENSMUSG00000009670.11	Tex11	0.880833	1.07572	20.2141	7.95949e-05	0.0373833	54	56	55	61	71	32	37	42
ENSMUSG00000020627.10	Klhl29	0.832239	2.89494	20.3654	7.57869e-05	0.035899	159	192	150	264	242	112	126	150
ENSMUSG00000033715.15	Akr1c14	0.828346	6.02657	22.7935	7.36038e-05	0.0354269	1938	1415	1710	1886	1991	946	1133	1407
ENSMUSG00000019478.16	Rab4a	0.764011	2.79326	27.9644	7.70777e-06	0.0063757	210	185	220	220	203	142	127	152
ENSMUSG00000027490.17	E2f1	0.736871	3.63254	50.8854	3.42667e-08	7.59639e-05	376	388	415	413	353	240	292	270
ENSMUSG00000038085.13	Cnbd2	0.733339	3.06201	25.4305	1.59378e-05	0.0109936	186.29	241.94	286.13	320.79	253.06	164.3	159.76	204.72
ENSMUSG00000031881.6	Cdh16	0.691186	3.42827	27.6762	8.35815e-06	0.00681202	234	314	257	370	328	212	236	189
ENSMUSG00000031781.14	Ciapin1	0.631728	4.66502	58.0155	8.65838e-09	2.08633e-05	760	725	784	790.22	704.22	550	522.85	601
ENSMUSG00000074793.10	Hspa12b	0.574335	6.287	23.4757	3.75105e-05	0.0221156	1801	2278	2303	2596	2131	1766	1500	1844
ENSMUSG00000036158.12	Prickle1	0.572168	6.86307	20.1883	0.000110035	0.0469094	2405	2919	2963	3393	3285	2603	2009	2292
ENSMUSG00000000440.12	Pparg	0.530213	3.41645	20.5897	7.04954e-05	0.0342713	305	276	293	267	279	213	211	256
ENSMUSG00000021775.11	Nr1d2	0.527799	6.38523	20.4515	9.07386e-05	0.0415605	1535	2144	2532	2985.99	2321	1545	1708	2187
ENSMUSG00000039081.10	Zfp503	0.527143	5.9563	45.3594	1.08356e-07	0.000222415	1500	1518	1596	1628	1641	1299	1158	1313
ENSMUSG00000026640.12	Plxna2	0.519773	5.88118	24.6843	1.98668e-05	0.0132655	1280	1261	1367	1493	1786	1194	1069	1193
ENSMUSG00000035934.16	Pknox2	0.518826	4.98637	21.5093	5.25708e-05	0.0280147	760	1090	707	975	895	707	701	718
ENSMUSG00000033595.7	Lgi3	0.517762	7.79696	31.7969	2.72396e-06	0.00301929	5075	5547	5684	5964	5513	5127	4173	4035
ENSMUSG00000022389.15	Tef	0.508123	7.43088	24.526	2.08256e-05	0.0136531	3871	4161	4546	5709	4849	3125.98	3494	4536
ENSMUSG00000038253.6	Hoxa5	0.472487	5.07761	19.7645	9.21592e-05	0.0418652	822	856	714	947	962	839	604	696
ENSMUSG00000020937.14	Plcd3	0.472109	2.9949	20.4329	7.4151e-05	0.0354269	191	234	232	252	231	191	172	201
ENSMUSG00000052852.8	Reep1	0.468456	4.38066	20.107	8.24134e-05	0.0383818	531	507	563	596	531	468	409	480
ENSMUSG00000041361.13	Myzap	0.456481	7.26814	19.9082	8.7929e-05	0.0406093	3899	3979	3863	4542	3847	3420	3055	3627
ENSMUSG00000002504.15	Slc9a3r2	0.453773	8.53554	21.9456	4.58273e-05	0.0253979	9688	9091	9975	9819	9127	8228	7239	8563
ENSMUSG00000033960.6	Jcad	0.432538	8.40929	21.6346	5.05322e-05	0.0277282	7289	7765	8369	8495	8506	6923	6574	7109
ENSMUSG00000071379.2	Hpcal1	0.426992	6.51669	21.4209	5.40617e-05	0.0284037	2564	2195	2224	2348	2503	2053	1923	2120
ENSMUSG00000039050.8	Osbpl2	0.375481	5.85267	28.0856	7.45074e-06	0.00636702	1344	1493	1485	1622	1473	1294	1185	1454
ENSMUSG00000024030.7	Abcg1	0.360002	6.61102	19.7113	9.37789e-05	0.0422546	2048	2532	2839	2832	2674	2566	2104	2226
ENSMUSG00000005836.10	Gata6	0.334117	5.17554	22.8424	3.46846e-05	0.0208941	765	839	898	923	776	753	770	764
ENSMUSG00000031661.12	Nkd1	0.329066	7.31098	22.2405	4.17935e-05	0.024074	4045	3931	4004	4262	3908	3877	3427	3757
ENSMUSG00000035161.7	Ints6	-0.372262	4.80432	19.2721	0.000108378	0.0465615	377	544	557	522	464	701	787	693
ENSMUSG00000021277.16	Traf3	-0.383729	5.81329	25.438	1.59028e-05	0.0109936	796	1035	1124	1089	944	1390	1608	1453
ENSMUSG00000046962.16	Zbtb21	-0.395483	4.57665	26.7028	1.10214e-05	0.00860304	360	377	462	479	367	618	623	600
ENSMUSG00000021302.10	Ggps1	-0.399811	5.61305	37.8672	5.9444e-07	0.00080693	661.97	813.84	809.83	882.98	773.99	1102.99	1182.88	1281.94
ENSMUSG00000068040.10	Tm9sf4	-0.431788	6.24151	55.3698	1.42349e-08	3.28713e-05	1105	1290	1440	1427	1224	2016	2021	1956
ENSMUSG00000037761.16	Actr5	-0.434602	3.73835	21.2001	5.79866e-05	0.0294833	160	220	248	231	220	332	325	341
ENSMUSG00000031792.15	Usb1	-0.452643	4.39226	30.1322	4.24492e-06	0.00398742	314	357	391	331	324	562	538	515
ENSMUSG00000032024.10	Clmp	-0.474098	4.33235	21.5192	5.24064e-05	0.0280147	303.3	285.45	374.69	384.86	297.75	504.42	604.52	455.45
ENSMUSG00000061411.12	Nol4l	-0.484349	4.99287	31.3616	3.05547e-06	0.00319504	382	538	583	617	523	913	819	792
ENSMUSG00000026896.14	Ifih1	-0.485943	5.54216	20.8603	6.84943e-05	0.0335931	762	1073	1093	1105	807	1343	1933	1345
ENSMUSG00000016087.13	Fli1	-0.487354	5.20812	41.3295	2.64798e-07	0.000431628	537	697	756	706	643	1073	998	1137
ENSMUSG00000032595.10	Cdhr4	-0.502696	5.13158	31.0494	3.31947e-06	0.00340682	558.88	607.91	686.9	718.12	558.46	999.71	995.88	1043.95
ENSMUSG00000047735.14	Samd9l	-0.506855	6.80917	22.4653	4.367e-05	0.0246963	1523	2306	2375	2281	1991	2854	4037	3265
ENSMUSG00000042842.11	Serpinb6b	-0.509066	7.17126	30.6755	3.66783e-06	0.00362991	2353	2493	2454	2501	1909	3619	4103	3737.44
ENSMUSG00000020275.9	Rel	-0.512362	4.98792	21.3244	5.5813e-05	0.0286584	411	473	534	571	479	731	914	763
ENSMUSG00000017639.13	Rab11fip4	-0.531368	4.53004	28.0775	7.4675e-06	0.00636702	256	330	377	395	391	524	559	648
ENSMUSG00000046886.6	Zfp474	-0.532316	3.32234	19.074	0.000115739	0.0485938	145	167	195	196	149	276	260	308
ENSMUSG00000037447.16	Arid5a	-0.545713	5.19996	20.2167	9.72575e-05	0.0434686	411	572	638	666	538	804	1046	963
ENSMUSG00000003283.14	Hck	-0.569778	5.61455	30.269	4.09934e-06	0.00391706	656	864	795	816	755	1177	1294	1492
ENSMUSG00000064215.13	Ifi27	-0.57101	6.28742	77.596	3.26788e-10	1.06535e-06	1233	1441	1486	1525	1186	2251	2328	2421
ENSMUSG00000014773.13	Dll1	-0.585195	5.48195	25.0967	2.31361e-05	0.0149096	605	944	1025	980	857	1642	1341	1534
ENSMUSG00000027474.13	Ccm2l	-0.585706	5.98764	29.835	5.33607e-06	0.00476985	870	1036	1071	1089	956	1750	1645	1777
ENSMUSG00000028525.16	Pde4b	-0.663413	6.71045	21.267	9.81303e-05	0.0435078	1167	2331	2105	1776	1261	3342	2947	3035
ENSMUSG00000022066.16	Entpd4b	-0.666211	5.41105	43.078	1.78625e-07	0.000329986	504.89	469.44	504.58	595.53	516.16	981.46	864.43	982.99
ENSMUSG00000062175.13	Tgif2	-0.700177	3.36905	29.838	4.5969e-06	0.00424608	124.63	138.42	148.17	161.05	146.41	276.38	284.35	239.97
ENSMUSG00000048148.18	Nwd1	-0.752271	2.88798	25.7481	1.45242e-05	0.0104538	99	104	123	113	109	211	184	240
ENSMUSG00000021922.17	Itih4	-0.815131	6.74623	38.7608	1.19747e-06	0.0015083	1419	1789	2064	1780	1433	3410	3882	2906
ENSMUSG00000020072.15	Pbld2	-0.839034	2.29271	22.977	3.3279e-05	0.0204928	66	85.78	100	86.8	74	135.46	228.84	139.86
ENSMUSG00000095463.8	Entpd4	-0.886243	5.75556	100.634	1.3677e-11	5.8307e-08	542.55	533.11	653.6	597.54	545.95	1212.28	1141.98	1296.61
ENSMUSG00000017740.17	Slc12a5	-0.889809	2.55333	25.9467	1.37084e-05	0.0101297	58	68	106	89	75	212	139	150
ENSMUSG00000014602.15	Kif1a	-0.917741	3.29316	29.3064	6.23415e-06	0.00548417	118	123	191	158	118	292	303	319
ENSMUSG00000036564.17	Ndrg4	-0.955149	2.77388	25.7018	1.47715e-05	0.0104955	62	72	81	123	72	206	156	180
ENSMUSG00000025348.9	Itga7	-0.956424	5.1376	31.3859	8.68669e-06	0.0069687	419	489	560	497	402	1000	1211	933
ENSMUSG00000027636.11	Sla2	-0.959601	2.52303	26.5276	1.15898e-05	0.00868001	74.88	57.48	58.45	42.48	50.75	125.63	118.26	140.09
ENSMUSG00000029530.16	Ccr9	-0.998957	2.0757	23.3021	3.01261e-05	0.0189729	48.84	52.57	67.17	52.57	61.39	151.25	117	120.12
ENSMUSG00000015647.9	Lama5	-1.02025	7.6095	46.6468	3.49917e-07	0.000538688	1551	2197	2484	2636	2272	5474	5215	4706
ENSMUSG00000041202.12	Pla2g2d	-1.04767	2.42368	19.8697	0.000104751	0.0457118	44	60	63	57	42	158	101	118
ENSMUSG00000035299.16	Mid1	-1.13735	4.09776	79.8316	2.3353e-10	8.08905e-07	200.56	231.67	307.03	269.99	268.85	561.55	625.33	740.23
ENSMUSG00000015709.9	Arnt2	-1.23045	1.33773	24.5076	2.09399e-05	0.0136531	16	20	35	25.42	19	64	69	52
ENSMUSG00000021322.8	Aoah	-1.38061	1.75893	43.4986	1.62712e-07	0.000322059	20	37	41	48	29	102	119	89
ENSMUSG00000076749.2	Tcrg-C1	-1.40876	1.54327	23.6865	3.32163e-05	0.0204928	45.94	24.96	25.9	21	35.12	108	59.84	116.6
ENSMUSG00000054672.13	5830411N06Rik	-1.42488	1.69442	23.5014	4.21353e-05	0.024074	40	49	74	51	49	187	160	136
ENSMUSG00000074629.3	4930518I15Rik	-1.47859	0.568837	21.3184	5.58472e-05	0.0286584	6	12	19	11	8	32	43	32
ENSMUSG00000094800.8	Gm9780	-1.48691	5.26215	77.4042	4.74469e-09	1.25217e-05	333.98	289.94	253.54	266.79	317.17	923.63	1024.91	889.57
ENSMUSG00000025461.11	Cd163l1	-1.52471	2.26385	25.0442	3.60853e-05	0.0215041	82	51	86	39	120	291	189	279
ENSMUSG00000072680.11	Tmem254c	-1.58079	4.85971	46.6217	5.9696e-07	0.00080693	251.19	106.37	173.46	221.84	252.84	693.88	630.64	762.19
ENSMUSG00000095304.9	Plac9a	-1.59441	2.19079	41.6307	2.80056e-07	0.000443457	28.37	21.3	32.01	30.94	23.33	113.04	52.62	117.75
ENSMUSG00000066677.12	Ifi208	-1.60111	5.06573	222.839	2.63978e-16	4.87664e-12	254.16	297.78	361.32	318.27	297.75	1064.78	1151.14	961.01
ENSMUSG00000072674.10	Plac9b	-1.6894	6.17766	95.9313	7.9964e-10	2.46205e-06	526.65	464.76	503.45	533.27	478.5	1941.33	1839.47	1791.67
ENSMUSG00000072676.12	Tmem254a	-1.70673	2.88833	101.471	1.23183e-11	5.68912e-08	41.36	42.54	51.97	58.94	55.44	195.58	208.65	155.84
ENSMUSG00000021867.16	Tmem254b	-1.80378	5.27594	205.761	9.89213e-15	1.09646e-10	269.45	338.09	298.57	267.22	200.72	1008.54	1206.71	1082.98
ENSMUSG00000073208.12	Speer4c	-2.0177	0.1377	38.8227	4.73626e-07	0.000709428	11.82	12.88	7.46	10.93	9.34	31.05	43.76	73.14
ENSMUSG00000063458.13	Lrmda	-2.12836	1.62389	130.768	4.54722e-13	2.80013e-09	17	20	10	21	13	82	75	88
ENSMUSG00000030117.5	Gdf3	-2.24955	0.402129	42.7167	1.93616e-07	0.000346142	4	5	3	6	3	16	27	27
ENSMUSG00000095366.2	Gm21860	-2.24987	0.645453	27.6458	1.83758e-05	0.0124195	8.8	28.45	30.18	28.79	22.17	42.29	211.33	129.33
ENSMUSG00000099762.3	Gm21149	-2.30785	0.906426	35.7216	1.62493e-06	0.00191607	7.88	11.8	7.54	9.55	10.56	30.04	38.84	94.54
ENSMUSG00000029361.18	Nos1	-2.37821	-1.28791	25.4029	1.60675e-05	0.0109936	2	3	5	6	7	19	10	55
ENSMUSG00000074676.2	Foxs1	-2.42805	2.28637	159.674	3.00389e-14	2.77465e-10	24	30	28	24	16	175	156	121
ENSMUSG00000109093.1	Gm19950	-2.53472	-1.13419	19.2058	0.000114102	0.048272	5	3	2	1	3	39	11	8
ENSMUSG00000085331.1	Gm11274	-2.54763	-1.08283	21.4055	5.43258e-05	0.0284037	1	0	3	2	2	12	8	14
ENSMUSG00000076613.4	Ighg2b	-2.65712	7.18659	41.7529	1.61006e-06	0.00191607	138	129.7	125	74	113	793	860	882
ENSMUSG00000096336.2	Igkv1-135	-2.69014	3.78089	38.8524	2.67993e-06	0.00301929	34	46	41	29	38	173	483	177
ENSMUSG00000098975.7	Gm27177	-2.78937	3.81068	89.4921	1.96173e-09	5.72216e-06	40.63	21.77	20.91	71.84	35.17	251.61	331.73	319.83
ENSMUSG00000112778.1	Gm33677	-3.12665	-1.08504	21.1572	5.87839e-05	0.0296169	0	1	0	2	0	7	7	7
ENSMUSG00000107253.1	Gm43634	-3.41272	-1.17679	21.9665	4.5527e-05	0.0253979	0	2.03	0	2.24	0	14.06	11.7	9.15
ENSMUSG00000097863.1	1010001B22Rik	-3.89445	-1.36071	38.565	5.03406e-07	0.000734191	0	2	0	0	0	8	6	12
ENSMUSG00000095197.6	Ighv1-59	-3.9454	1.46257	30.2583	1.39608e-05	0.0101805	3.36	3	4	3	5.01	118.77	10	72.1
ENSMUSG00000072675.12	Duxbl2	-4.01786	0.465897	40.9008	6.67496e-07	0.000880793	0	0.33	6.63	0	0	39.75	6.22	37.42
ENSMUSG00000027855.13	Sycp1	-4.14317	-1.68479	36.8531	7.59166e-07	0.000978459	1	0	0	1	0	10	6	15
ENSMUSG00000076612.8	Ighg2c	-4.24916	8.63703	24.2612	6.16742e-05	0.0307932	21	52.3	21	29	29	644	391	970
ENSMUSG00000042459.8	Bpifa2	-4.30855	-0.645746	64.4717	2.73115e-09	7.56814e-06	2	1	1	0	0	24	22	16
ENSMUSG00000093954.8	Gm16867	-4.42987	2.76713	36.6482	4.04332e-06	0.00391706	0	6.63	0	12.49	0	152.09	24.04	114.19
ENSMUSG00000069300.3	Hist1h2bj	-5.01008	-2.08941	20.0481	0.000106179	0.045973	0	0	0	0	0	3.42	5.45	3.57
ENSMUSG00000102660.1	Gm38378	-5.01412	-1.88405	33.2052	2.96295e-06	0.00315787	0	0	0	0	0	3.5	3.5	5.5
ENSMUSG00000104371.1	Gm37513	-5.01412	-1.88405	33.2052	2.96295e-06	0.00315787	0	0	0	0	0	3.5	3.5	5.5
ENSMUSG00000094993.2	Igkv4-51	-5.05972	-1.85751	35.706	1.31675e-06	0.00162168	0	2	0	1	0	3	57	21
ENSMUSG00000098270.1	Gm27221	-5.40338	-1.29607	42.3143	2.11893e-07	0.000355858	0	0.17	0	0	0	3.76	8.84	8.82
ENSMUSG00000099027.1	Gm27176	-5.40338	-1.29607	42.3143	2.11893e-07	0.000355858	0	0.17	0	0	0	3.76	8.84	8.82
ENSMUSG00000112824.1	Gm47917	-5.74578	-1.52177	24.557	2.80604e-05	0.0178751	0	0	0	0	0	12	4	5
ENSMUSG00000090015.8	Gm15446	-5.95617	3.44145	1287.37	3.53774e-28	9.80325e-24	6.45	2.49	2.35	3.82	4.81	290.94	273.08	311.32
ENSMUSG00000029369.17	Afm	-6.66071	-0.662775	66.2485	5.26238e-09	1.32567e-05	0	0	0	0	0	17	8	15
ENSMUSG00000069306.5	Hist1h4m	-7.0019	-0.946562	53.4256	8.65052e-08	0.000184393	0	0	0	0	0	13.34	18.9	18.47
ENSMUSG00000094526.1	Gm21451	-7.81262	1.36478	36.3735	7.66016e-06	0.0063757	0	0	0	0	0	51.05	9.3	29.06
ENSMUSG00000062157.6	Ifnlr1	-8.65553	4.24595	1746.32	2.46946e-30	1.3686e-25	0	2	0	2	1	513	457	575

## Sheet: D) Interferome
DOWN DEGs (n=84) entered into interferome	Ensembl Id	Gene Symbol	Description	Entrez	GenBank	UniGene
23/84 were identified as DEGs (listed here)	ENSMUSG00000029369	Afm	afamin [Source:MGI Symbol;Acc:MGI:2429409]	280662	AAI00598	Mm.348786
	ENSMUSG00000021322	Aoah	acyloxyacyl hydrolase [Source:MGI Symbol;Acc:MGI:1350928]	27052	BAC39187	Mm.314046
	ENSMUSG00000037447	Arid5a	AT rich interactive domain 5A (MRF1-like) [Source:MGI Symbol;Acc:MGI:2443039]	214855	AAH27152	Mm.34316
	ENSMUSG00000025461	Cd163l1	CD163 molecule-like 1 [Source:MGI Symbol;Acc:MGI:2443796]	244233	EDL17926
	ENSMUSG00000032595	Cdhr4	cadherin-related family member 4 [Source:MGI Symbol;Acc:MGI:1916648]	69398	EDL21245
	ENSMUSG00000014773	Dll1	delta-like 1 (Drosophila) [Source:MGI Symbol;Acc:MGI:104659]	13388	AAH65063	Mm.392385
	ENSMUSG00000016087	Fli1	Friend leukemia integration 1 [Source:MGI Symbol;Acc:MGI:95554]	14247		Mm.416380
	ENSG00000101336	HCK	hemopoietic cell kinase [Source:HGNC Symbol;Acc:4840]	3055	BAF83617	Hs.655210
	ENSMUSG00000003283	Hck	hemopoietic cell kinase [Source:MGI Symbol;Acc:MGI:96052]	15162		Mm.416098
	ENSG00000165949	IFI27	interferon, alpha-inducible protein 27 [Source:HGNC Symbol;Acc:5397]	3429	CAA47739	Hs.670794
	ENSG00000115267	IFIH1	interferon induced with helicase C domain 1 [Source:HGNC Symbol;Acc:18873]	64135	AAX93137	Hs.163173
	ENSMUSG00000026896	Ifih1	interferon induced with helicase C domain 1 [Source:MGI Symbol;Acc:MGI:1918836]	71586	AAH80200	Mm.136224
	ENSMUSG00000036564	Ndrg4	N-myc downstream regulated gene 4 [Source:MGI Symbol;Acc:MGI:2384590]	234593	AAH06595	Mm.394553
	ENSMUSG00000020068	Pbld2	phenazine biosynthesis-like protein domain containing 2 [Source:MGI Symbol;Acc:MGI:1914557]	67307		Mm.368563
	ENSMUSG00000041202	Pla2g2d	phospholipase A2, group IID [Source:MGI Symbol;Acc:MGI:1341796]	18782	EDL13278	Mm.71913
	ENSMUSG00000095304	Plac9a	placenta specific 9a [Source:MGI Symbol;Acc:MGI:2663998]	100039246
	ENSMUSG00000072674	Plac9b	placenta specific 9b [Source:MGI Symbol;Acc:MGI:3711222]	100039246
	ENSG00000177409	SAMD9L	sterile alpha motif domain containing 9-like [Source:HGNC Symbol;Acc:1349]	219285	BAG65533	Hs.489118
	ENSMUSG00000047735	Samd9l	sterile alpha motif domain containing 9-like [Source:MGI Symbol;Acc:MGI:1343184]	209086		Mm.196013
	ENSMUSG00000042842	Serpinb6b	serine (or cysteine) peptidase inhibitor, clade B, member 6b [Source:MGI Symbol;Acc:MGI:894688]	20708		Mm.36526
	ENSMUSG00000021867	Tmem254b	transmembrane protein 254b [Source:MGI Symbol;Acc:MGI:3710397]	100039257		Mm.33344
	ENSMUSG00000072680	Tmem254c	transmembrane protein 254c [Source:MGI Symbol;Acc:MGI:3711260]	100039257	BAB25584
	ENSMUSG00000031792	Usb1	U6 snRNA biogenesis 1 [Source:MGI Symbol;Acc:MGI:2142454]	101985		Mm.394399

## Sheet: E) USRs
All DEGs (n=132)	Upstream Regulator	Expr Log Ratio	Molecule Type	Predicted Activation State	Activation z-score	p-value of overlap	Target Molecules in Dataset	Mechanistic Network
Analysed by IPA upstream regulators	lipopolysaccharide		chemical drug	Inhibited	-3.16	0.0056	ABCG1,CCR9,Cd59a,E2F1,FLI1,HCK,IFI16,IFIH1,Ighg2b,ITIH4,NOS1,PDE4B,PLA2G2D,PPARG,PPP1R16B,REL,TRAF3
	IFNG		cytokine	Inhibited	-3.053	0.0224	ARNT2,DLL1,E2F1,HCK,IFI16,IFIH1,Ighg2b,NDRG4,NOS1,NR1D1,PPARG,RAB3C
	TNF		cytokine	Inhibited	-2.805	1	E2F1,IFI16,IFIH1,NOS1,PDE4B,PPARG,REL,TRAF3
	Interferon alpha		group	Inhibited	-2.205	0.0144	E2F1,IFI16,Ifi27,IFIH1,IFNLR1,SAMD9L
	IL1B		cytokine	Inhibited	-2.195	0.0599	E2F1,IFI16,NOS1,NR1D1,PDE4B,PPARG,RAB3C,REL
	TCF3		transcription regulator	Inhibited	-2	0.0225	CCR9,IFI16,Ifi27,PPARG,SAMD9L
	SOX2		transcription regulator		-1.982	0.055	DLL1,GATA6,GDF3,Gm15446,PPARG
	poly rI:rC-RNA		biologic drug		-1.965	0.0297	ARHGAP40,ARID5A,DLL1,FLI1,IFI16,IFIH1,REL
	trichostatin A		chemical drug		-1.951	0.345	GATA6,PPARG,REL,SLC12A5,TRAF3
	IFNB1		cytokine		-1.916	0.00174	DLL1,E2F1,GDF3,IFI16,IFIH1,REL
	ARNT2	-1.23	transcription regulator		-1.342	0.00202	ABCG1,ARNT2,BPIFA2,DLL1,IFI16
	SIM1		transcription regulator		-1.342	0.00228	ABCG1,ARNT2,BPIFA2,DLL1,IFI16
	APP		other		-1.154	0.0218	ABCG1,IFI16,IFIH1,NOS1,NR1D1,PDE4B,PPARG,Serpinb6b,TRAF3
	THPO		cytokine		-1.067	0.00103	CIAPIN1,FLI1,Ifi27,REL
	LIF		cytokine		-1.067	0.00252	E2F1,GAL,GATA6,IFI16,PPARG
	IL6		cytokine		-1	0.00706	E2F1,FLI1,GAL,IFI16,Ighg2b,NKD1,PLA2G2D,PPARG,TRAF3
	Tcf7		transcription regulator		-1	0.0155	CCR9,PPARG,RAB4A,REL
	SMARCA4		transcription regulator		-0.912	0.00635	CDH16,DLL1,E2F1,IFI16,ITGA7,PDE4B,PPARG,ZNF503
	CEBPB		transcription regulator		-0.594	0.0411	E2F1,H4C4,NDRG4,PPARG,SYCP1
	fulvestrant		chemical drug		-0.447	0.00714	E2F1,GAL,Ifi27,NOS1,PPARG
	RARA		ligand-dependent nuclear receptor		-0.447	0.0205	ARNT2,CCR9,E2F1,HOXA5,PLXNA2
	NFkB (complex)		complex		-0.378	0.0221	ABCG1,NOS1,NR1D1,PPARG,RAB3C,REL,TRAF3
	NOTCH1		transcription regulator		-0.371	0.00614	DLL1,E2F1,IFI16,PPARG,REL
	PDGF BB		complex		-0.169	0.014	Akr1c14,FOXS1,NOS1,OSBPL2,PPARG
	Ca2+		chemical - endogenous mammalian		-0.152	0.0293	E2F1,NOS1,NR1D1,PPARG
	miR-34a-5p (and other miRNAs w/seed GGCAGUG)		mature microRNA		-0.106	0.00262	DLL1,E2F1,PPARG,SAMD9L
	tretinoin		chemical - endogenous mammalian		-0.037	0.00428	ABCG1,CCR9,Cd59a,DLL1,GATA6,GDF3,HOXA5,IFI16,IFIH1,MID1,Nnt,PPARG,PPP1R16B,REL,SAMD9L
	TMPRSS2-ERG		fusion gene/product		0	0.00235	PLXNA2,PPARG,SAMD9L,ZNF503
	cyclic AMP		chemical - endogenous mammalian		0	0.0289	E2F1,GATA6,NOS1,PDE4B
	tetradecanoylphorbol acetate		chemical drug		0.06	0.0336	Cd59a,E2F1,GAL,HOXA5,IFI16,JCAD,PPARG,REL,TEF,TRAF3
	KRAS		enzyme		0.106	0.00198	Akr1c14,E2F1,H4C4,HOXA5,LAMA5,LGI3,NKD1,NOS1,PDE4B,PPARG
	8-bromo-cAMP		chemical reagent		0.213	0.000301	ARNT2,E2F1,GATA6,ITGA7,NKD1,NOS1,PDE4B,PPARG,PRICKLE1
	IL4		cytokine		0.247	0.0115	ARID5A,CCR9,HCK,IFI16,IFIH1,IFNLR1,Ighg2b,PDE4B,PPARG,TRAF3
	ID2		transcription regulator		0.283	0.000327	CCR9,DLL1,IFI16,REL,TOX2,TRAF3	8 (2)
	PRKAA2		kinase		0.45	0.00135	E2F1,KLHL29,NOS1,PPARG
	progesterone		chemical - endogenous mammalian		0.577	0.026	ARID5A,CDH16,E2F1,GAL,Ighg2b,NR1D1,PPARG
	AHR		ligand-dependent nuclear receptor		0.6	0.0249	E2F1,ITGA7,PDE4B,PLXNA2,PPARG
	CREB1		transcription regulator		0.6	0.0372	CLMP,GAL,HPCAL1,NOS1,PLXNA2,PPARG
	IL10RA		transmembrane receptor		0.64	0.0023	ABCG1,Akr1c14,IFI16,Nnt,Serpinb6b,Speer4a (includes others)
	L-triiodothyronine		chemical - endogenous mammalian		0.7	0.00832	CIAPIN1,E2F1,ITGA7,NR1D1,PPARG,SLC12A5,SLC35G1
	IL33		cytokine		0.796	0.00836	ABCG1,HCK,LAMA5,REL,TRAF3
	beta-estradiol		chemical - endogenous mammalian		0.804	0.0313	ARNT2,DLL1,E2F1,GAL,ITGA7,ITIH4,KIF1A,NKD1,NOS1,PDE4B,PLCD3,PPARG,PRICKLE1,REEP1,REL,TGIF2,TRAF3
	medroxyprogesterone acetate		chemical drug		0.816	0.00381	ARNT2,E2F1,ITGA7,NKD1,PPARG,PRICKLE1,REEP1
	SIRT1		transcription regulator		1	0.0108	ABCG1,ARNT2,HCK,HOXA5,KIF1A,NR1D1
	PKD1		ion channel		1	0.0115	IFNLR1,MID1,PDE4B,PKNOX2
	troglitazone		chemical drug		1.046	0.0261	ABCG1,E2F1,IFI16,PPARG,TGIF2
	TGFB1		growth factor		1.156	0.0278	ABCG1,AFM,ARNT2,E2F1,FLI1,GAL,GGPS1,IFI16,IFIH1,Ighg2b,ITGA7,MID1,NDRG4,PPARG
	STAT6		transcription regulator		1.231	0.0378	ARID5A,HCK,IFI16,IFIH1,Ighg2b
	ETV6-RUNX1		fusion gene/product		1.732	0.000441	ABCG1,CCM2L,DLL1,H4C4,IFI16,IFIH1,PDE4B
	Nr1h		group		1.919	0.00474	ABCG1,ARNT2,HCK,IFIH1
	SB203580		chemical - kinase inhibitor	Activated	2	0.152	PDE4B,PPARG,REL,Serpinb6b
	dexamethasone		chemical drug	Activated	2.494	0.0537	Akr1c14,Cd59a,CDH16,DLL1,GAL,GATA6,GPR153,HPCAL1,LAMA5,Nnt,NOS1,PDE4B,PPARG,RAB4A,TGIF2
